# Supplementary material for: Lipid-mediated regulation of SKN-1/Nrf in response to germ cell absence
Source: eLife. 2015 Aug 24;4:e07836. doi: 10.7554/eLife.07836 (PMC4541496; doi:10.7554/eLife.07836)
Supplement: Supplementary file 1. — (a) List of genes activated by GSC absence. The gene list is sorted by functional grouping, then by fold change of mRNA expression in glp-1(ts) relative to wild type. A fold change cutoff of 4 (p < 0.05; n = 1306) was used (see Figure 3—figure supplement 1 for rationale). A more conservative fold change cutoff of 5 that captured fewer genes (n = 615) was used for DAVID cluster analysis. FDR denotes false discovery rate. (b) List of genes activated by SKN-1 in wild-type animals. The gene list is sorted by functional grouping, then by fold change of mRNA expression in WT skn-1 RNAi-treated worms relative to WT control vector-treated worms. A fold change cutoff of 0.67 (n = 295) was used to enrich for higher confidence SKN-1 targets. (c) List of genes activated by SKN-1 in GSC(−) animals. The gene list is sorted by functional grouping, then by fold change of mRNA expression in glp-1(ts) skn-1 RNAi-treated worms relative to glp-1(ts) control vector-treated worms. A fold change cutoff of 0.67 (p < 0.05; n = 529) was used to enrich for higher confidence SKN-1 targets. (d) List of genes activated by GSC absence in a SKN-1-dependent manner. The gene list is sorted by functional grouping, then by fold change of mRNA expression in glp-1(ts) skn-1 RNAi-treated worms relative to glp-1(ts) control vector-treated worms. We employed a GSC(−) fold change cutoff of >4 and skn-1 RNAi cutoff of <0.67 to generate the list (see Figure 3—figure supplement 1 for GSC(−) FC cutoff rationale). Statistics were generated by min analysis. Predicted SKN-1 binding sites were determined using 1.5 kb upstream sequences from WBcel235 and the SKN-1 JASPAR matrix (Staab et al., 2013a). SKN-1::GFP ChIP-seq binding analysis was performed using the L1, L2, and L3 data sets available from modENCODE (Niu et al., 2011). Additional details are available in ‘Materials and methods’. DOI: http://dx.doi.org/10.7554/eLife.07836.022 [file elife-07836-supp1.xlsx]

## Sheet: Info
	Steinbaugh et al. (2015) RNA-Seq analysis of GSC removal and SKN-1 target gene expression [GSE63075] Blackwell Lab, Joslin Diabetes Center/Harvard Medical School mike@steinbaugh.com
	File	Description	N	GSC(-) > FC cutoff	skn-1 RNAi < FC cutoff	Differential expression
	Supplementary file 1a	Genes activated by GSC removal	1306	4	NA	FC: glp-1(ts) + vector / N2 + vector
	Supplementary file 1b	Genes activated by SKN-1 in wild type genetic background	295	NA	0.67	FC: N2 + skn-1 RNAi / N2 + vector
	Supplementary file 1c	Genes activated by SKN-1 in glp-1(ts) genetic background	529	NA	0.67	FC: glp-1(ts) + skn-1 RNAi / glp-1(ts) + vector
	Supplementary file 1d	Genes activated by GSC removal in a SKN-1-dependent manner	87	4	0.67	FC1: glp-1(ts) + vector / N2 + vector; FC2: N2 + skn-1 RNAi / N2 + vector
	Notes
	Worms were maintained at 25°C. RNAi was started at L1 stage. RNA was extracted at D1 adulthood. FC denotes fold change. See Figure S1 for GSC(-) FC cutoff rationale. RNA-Seq reads were processed using a custom voom/limma pipeline in R/Bioconductor. Ensembl WBcel235 was used as the reference genome. Functional annotations and phenotypes were obtained from Wormbase build WS246. Refer to the Supplem…

## Sheet: Supplementary file 1a
Grouping	Rank	WormBase ID	Sequence	Gene Name	WT CPM	FC	t	P	FDR	Gene Class	Manual Annotation	Description
(1) Detoxification	2	WBGene00008905	F17B5.1a	F17B5.1	0.2211	42.555	4.42	0.00122	0.00218	not known	thioredoxin-like	none available
(1) Detoxification	16	WBGene00008809	F14F7.2	cyp-13A11	0.0491649	18.9672	5.72	0.000173	0.000393	CYtochrome P450 family		cyp-13A11 encodes one of ~80 C. elegans cytochrome P450s: membrane-associated, heme-containing NADPH-dependent monooxygenases that catalyze the oxidative metabolism of a variety of exogenous compounds and endogenous substrates; cyp-13A11 expression is upregulated in response to the tetrachlorobiphenyl PCB52.
(1) Detoxification	27	WBGene00016013	C23G10.6	C23G10.6	0.6835	16.2834	9.52	2.04e-06	1.3e-05	not known	UDP-glucoronosyl/glucosyl transferase	none available
(1) Detoxification	45	WBGene00003473	K11G9.6	mtl-1	7.62346	13.8885	6.82	4.04e-05	0.000117	MeTaLlothionein		mtl-1 encodes one of two C. elegans metallothioneins, small, cysteine-rich, metal-binding proteins; MTL-1 functions in metal detoxification and homeostasis and in stress adaptation; in addition, mtl-1 plays a role in regulating growth and fertility; mtl-1 is constitutively expressed in the terminal bulb of the pharynx and expression is induced in larval intestinal cells following exposure to cadm…
(1) Detoxification	119	WBGene00004932	C08A9.1	sod-3	2.69153	9.30809	8.84	4.04e-06	2.09e-05	SOD (superoxide dismutase)		sod-3 encodes a iron/manganese superoxide dismutase, predicted to be mitochondrial, that might defend against oxidative stress and promote normal lifespan; sod-3 mRNA levels are diminished by mutation of daf-16 and chromatin immunoprecipitation (ChIP) studies demonstrate that DAF-16 can directly bind the sod-3 promoter; heterologously expressed SOD-3 in E. coli protects against methyl viologen-in…
(1) Detoxification	124	WBGene00011009	R04D3.1	cyp-14A4	0.0962121	9.18931	4.3	0.00147	0.00257	CYtochrome P450 family		cyp-14A4 encodes one of ~80 C. elegans cytochrome P450s: membrane-associated, heme-containing NADPH-dependent monooxygenases that catalyze the oxidative metabolism of a variety of exogenous compounds and endogenous substrates.
(1) Detoxification	187	WBGene00004003	C47A10.1	pgp-9	14.6179	7.45013	19.3	2.06e-09	1.24e-06	P-GlycoProtein related		pgp-9 encodes an ATP-binding protein that is a member of the P-glycoprotein subclass of the ATP-binding cassette (ABC) transporter superfamily; PGP-9 is predicted to function as a transmembrane protein that couples energy to transport of various molecules across membranes, and loss of pgp-9 activity via RNAi can result in embryonic lethality; pgp-9 promoter-gfp fusion proteins are expressed in th…
(1) Detoxification	188	WBGene00016697	C45H4.17	cyp-33C2	0.147208	7.43263	3.69	0.004	0.00636	CYtochrome P450 family		none available
(1) Detoxification	245	WBGene00012448	Y17D7A.4	cyp-33D3	0.128201	6.71204	3.6	0.00465	0.00729	CYtochrome P450 family		none available
(1) Detoxification	284	WBGene00004002	T21E8.3	pgp-8	0.674226	6.40597	4.04	0.00223	0.00375	P-GlycoProtein related		pgp-8 encodes an ATP-binding protein that is a member of the P-glycoprotein subclass of the ATP-binding cassette (ABC) transporter superfamily; PGP-8 is predicted to function as a transmembrane protein that couples energy to transport of various molecules across membranes, but as loss of pgp-8 activity via RNAi results in no obvious defects, the precise role of PGP-8 in C. elegans development and…
(1) Detoxification	288	WBGene00001758	Y45G12C.2	gst-10	11.823	6.38218	7.41	1.98e-05	6.66e-05	Glutathione S-Transferase		gst-10 encodes a glutathione S-transferase with similarity to the pi class of human glutathione S-transferases; GST-10 catalyzes the conjugation of glutathione to 4-hydroxynonenal in vitro.
(1) Detoxification	298	WBGene00010470	K01D12.11	cdr-4	22.9398	6.30133	5.19	0.000371	0.00076	CaDmium Responsive	glutathione S-transferase	cdr-4 encodes a predicted transmembrane protein that is a member of the CDR (cadmium responsive) family of proteins; cdr-4 expression is upregulated in response to cadmium treatment.
(1) Detoxification	360	WBGene00001772	F37B1.1	gst-24	4.65086	5.92119	10.3	9.7e-07	8.11e-06	Glutathione S-Transferase		none available
(1) Detoxification	362	WBGene00001787	Y53F4B.33	gst-39	5.64644	5.91446	8.58	5.31e-06	2.51e-05	Glutathione S-Transferase		none available
(1) Detoxification	366	WBGene00008296	C54D10.1	cdr-2	12.9231	5.89246	13.9	5.57e-08	2.31e-06	CaDmium Responsive		cdr-2 encodes a predicted transmembrane protein that is a member of the CDR (cadmium responsive) family of proteins; cdr-2 expression is increased upon exposure to cadmium ions, and loss of cdr-2 activity results in increased sensitivity to cadmium.
(1) Detoxification	381	WBGene00008499	F01D5.9	cyp-37A1	8.65462	5.81359	12.5	1.57e-07	3.29e-06	CYtochrome P450 family		none available
(1) Detoxification	386	WBGene00021167	Y5H2B.5	cyp-32B1	3.49954	5.77234	7.37	2.06e-05	6.88e-05	CYtochrome P450 family		none available
(1) Detoxification	447	WBGene00000372	T10B9.10	cyp-13A7	0.402661	5.50115	4.52	0.00104	0.00189	CYtochrome P450 family		cyp-13A7 encodes a homolog of cytochrome P450 proteins; these proteins are membrane proteins with a heme prosthetic group that catalyze the synthesis of steroid hormones (and bile salts), and also detoxify foreign substances (xenobiotic compounds); loss of cyp-13A7 activity in large-scale RNAi screens results in uncoordinated locomotion and decreased and/or slow growth; a cyp-13A7::gfp promoter f…
(1) Detoxification	512	WBGene00001819	ZK484.2a	haf-9	8.99062	5.27143	9.97	1.32e-06	9.72e-06	HAlF transporter (PGP related)		haf-9 encodes a protein similar to the conserved half-type ATP-binding cassette (ABC) transporter, TAPL/ABCB9; in elegans, haf-9 along with another TAPL gene, haf-4 is required for the formation of intestinal organelles; haf-9 and haf-4 are required for proper growth, normal brood size and for the normal defecation cycle; haf-9 and haf-4 are localized to intestinal organelles and physically inter…
(1) Detoxification	572	WBGene00001478	Y39A1A.19	fmo-3	4.96618	5.09719	12.8	1.26e-07	2.95e-06	Flavin-containing MonoOxygenase family		fmo-3 encodes a flavin-containing monoxygenase homologous to human FMO1, FMO2, and FMO3 (OMIM:602079, mutated in trimethylaminuria).
(1) Detoxification	640	WBGene00000831	Y54G11A.5	ctl-2	25.1821	4.91014	10.6	7.69e-07	7.06e-06	CaTaLase		ctl-2 encodes one of three C. elegans catalases; CTL-2 exhibits catalase and peroxidase activity in vitro, and thus likely functions in vivo as an antioxidant enzyme that protects cells from reactive oxygen species; ctl-2 activity is required for normal lifespan as well as for the extended lifespan seen in daf-2 mutant animals; in addition, ctl-2 is required for normal egg-laying capacity and for…
(1) Detoxification	699	WBGene00003474	T08G5.10	mtl-2	18.068	4.78578	3.53	0.00519	0.00804	MeTaLlothionein		mtl-2 encodes one of two C. elegans metallothioneins, small, cysteine-rich, metal-binding proteins; MTL-2 functions in metal detoxification and homeostasis and stress adaptation; in addition, mtl-2 plays a role in regulating growth and fertility; mtl-2 expression is induced in larval and adult intestinal cells following exposure to cadmium or heat shock; MTL-2 intestinal expression is dependent u…
(1) Detoxification	729	WBGene00001814	W04C9.1a	haf-4	12.9187	4.74479	13.4	7.71e-08	2.45e-06	HAlF transporter (PGP related)		haf-4 encodes a half-molecular ATP-binding cassette (ABC) transporters similar to the conserved half-type ATP-binding cassette (ABC) transporter, TAPL/ABCB9; in elegans, haf-4 along with another TAPL gene, haf-9 is required for the formation of intestinal organelles; haf-4 and haf-9 are required for proper growth, normal brood size and for the normal defecation cycle; haf-4 and haf-9 are localize…
(1) Detoxification	757	WBGene00001790	D1053.1	gst-42	10.4768	4.69254	11.2	4.51e-07	5.47e-06	Glutathione S-Transferase		gst-42 is orthologous to the human gene GLUTATHIONE TRANSFERASE ZETA-1 (also known as MALEYLACETOACETATE ISOMERASE; GSTZ1; OMIM:603758), which when mutated is thought to lead to a variety of type I tyrosinemia.
(1) Detoxification	766	WBGene00018260	F41B5.2	cyp-33C7	2.88873	4.68113	7.89	1.13e-05	4.34e-05	CYtochrome P450 family		none available
(1) Detoxification	772	WBGene00017108	E03E2.1	cyp-43A1	7.14822	4.67371	11.7	2.83e-07	4.32e-06	CYtochrome P450 family		none available
(1) Detoxification	775	WBGene00001754	F11G11.3	gst-6	5.3254	4.6676	6.25	8.41e-05	0.000215	Glutathione S-Transferase		gst-6 encodes a predicted glutathione S-transferase.
(1) Detoxification	785	WBGene00003997	ZK455.7	pgp-3	7.99965	4.6541	15	2.59e-08	1.85e-06	P-GlycoProtein related		pgp-3 encodes a transmembrane protein that is a member of the P-glycoprotein subclass of the ATP-binding cassette (ABC) transporter superfamily; with PGP-1, PGP-3 is required for defense against the pathogenic Pseudomonas aeruginosa strain PA14, and may facilitate ATP-dependent efflux of the toxic phenazine compounds produced by the bacteria; PGP-3 is also required for resistance to colchicine an…
(1) Detoxification	808	WBGene00019472	K07C6.4	cyp-35B1	1.05741	4.61093	9.12	3.03e-06	1.72e-05	CYtochrome P450 family		none available
(1) Detoxification	833	WBGene00009226	F28G4.1	cyp-37B1	4.12411	4.57565	6.05	0.000111	0.000271	CYtochrome P450 family		none available
(1) Detoxification	861	WBGene00001786	F35E8.8	gst-38	4.51015	4.53494	7.73	1.36e-05	4.99e-05	Glutathione S-Transferase		gst-38 encodes a glutathione-S-transferase; gst-38 is predicted to function as a phase II detoxification enzyme and its expression is altered in response to stress; a GST-38::GFP reporter is expressed in the intestine.
(1) Detoxification	895	WBGene00001774	Y53F4B.29	gst-26	9.25719	4.47258	9.14	2.96e-06	1.69e-05	Glutathione S-Transferase		none available
(1) Detoxification	898	WBGene00004008	F22E10.3	pgp-14	2.49605	4.47049	5.55	0.000221	0.000483	P-GlycoProtein related		pgp-14 encodes a member of the ABC transporter family with high similarity to the vertebrate MDR (multidrug resistance) family; PGP-14 is predicted to function as a transmembrane protein that couples energy to transport of various molecules across membranes, but as loss of pgp-14 activity via large-scale RNAi screens does not result in any obvious defects, the precise role of pgp-14 in C. elegans…
(1) Detoxification	936	WBGene00001775	Y53F4B.30	gst-27	12.687	4.40832	14	5.02e-08	2.29e-06	Glutathione S-Transferase		none available
(1) Detoxification	949	WBGene00001770	F21H7.1	gst-22	3.14081	4.39679	6.36	7.26e-05	0.00019	Glutathione S-Transferase		none available
(1) Detoxification	967	WBGene00000022	Y39D8C.1	abt-4	22.2848	4.36584	12.7	1.27e-07	2.95e-06	ABC Transporter family		abt-4 encodes a predicted ATP-binding cassette (ABC) transporter that is a member of the ABCA subfamily of transport proteins; ABT-4 is predicted to function as a transmembrane protein that couples energy to transport of various molecules across membranes, but as loss of abt-4 activity via RNAi results in no obvious defects, the precise role of abt-4 in C. elegans development and/or behavior is n…
(1) Detoxification	981	WBGene00011393	T03D8.6a	T03D8.6	8.78274	4.3512	11.9	2.44e-07	3.95e-06	not known	gamma-glutamyltransferase	none available
(1) Detoxification	1029	WBGene00001768	Y48E1B.10	gst-20	17.4915	4.30936	6.9	3.67e-05	0.000108	Glutathione S-Transferase		none available
(1) Detoxification	1080	WBGene00007964	C36A4.2	cyp-25A2	6.2442	4.24932	7.87	1.15e-05	4.4e-05	CYtochrome P450 family		none available
(1) Detoxification	1142	WBGene00001752	K08F4.7	gst-4	14.1712	4.16671	6.54	5.77e-05	0.000156	Glutathione S-Transferase		gst-4 encodes a putative glutathione-requiring prostaglandin D synthase; gst-4 is required for sperm to normally migrate towards a PUFA-based signal exuded by oocytes; gst-4(RNAi) hermaphrodites are infertile, both through aberrant loss of their own sperm and through failure of males to effectively inseminate them; in mammalian eicosanoid signalling, prostaglandin D synthase is required for the c…
(1) Detoxification	1161	WBGene00021817	Y53G8B.1	Y53G8B.1	3.38458	4.14334	7.87	1.16e-05	4.42e-05	not known	glutathione S-transferase	none available
(1) Detoxification	1190	WBGene00001479	F53F4.5a	fmo-4	7.53391	4.11515	11	5.01e-07	5.79e-06	Flavin-containing MonoOxygenase family		fmo-4 encodes a flavin-containing monoxygenase homologous to human FMO1, FMO2, and FMO3 (OMIM:602079, mutated in trimethylaminuria).
(1) Detoxification	1198	WBGene00001784	R07B1.4	gst-36	18.0729	4.10815	10	1.24e-06	9.39e-06	Glutathione S-Transferase		none available
(1) Detoxification	1228	WBGene00007963	C36A4.1	cyp-25A1	5.77142	4.07325	5.56	0.000218	0.000479	CYtochrome P450 family		cyp-25A1 encodes one of ~80 C. elegans cytochrome P450s: membrane-associated, heme-containing NADPH-dependent monooxygenases that catalyze the oxidative metabolism of a variety of exogenous compounds and endogenous substrates.
(1) Detoxification	1270	WBGene00000020	F12B6.1a	abt-2	10.4477	4.03888	13.6	6.53e-08	2.38e-06	ABC Transporter family		abt-2 encodes a predicted ATP-binding cassette (ABC) transporter that is a member of the ABCA subfamily of transport proteins; ABT-2 is predicted to function as a transmembrane protein that couples energy to transport of various molecules across membranes.
(1) Detoxification	1276	WBGene00015043	B0213.14	cyp-34A8	11.3394	4.03376	11.9	2.4e-07	3.94e-06	CYtochrome P450 family		none available
(1) Detoxification	1288	WBGene00010079	F55A11.6a	F55A11.6	5.49183	4.016	11.9	2.38e-07	3.94e-06	not known		F55A11.6 encodes a protein most similar to glutathione S-transferases; as loss of F55A11.6 activity via large-scale RNAi results in no obvious defects, the precise role of F55A11.6 in C. elegans development and/or behavior is not yet known.
(2) Lipid metabolism	13	WBGene00000989	ZK816.5	dhs-26	1.68391	20.1557	5.25	0.00034	0.000704	DeHydrogenases, Short chain		dhs-26 encodes a short-chain dehydrogenase predicted to be mitochondrial.
(2) Lipid metabolism	37	WBGene00001397	W06D12.3	fat-5	16.3927	14.6215	10.7	6.49e-07	6.5e-06	FATty acid desaturase		fat-5 encodes a delta-9 fatty acid desaturase that is predicted to be mitochondrial; when expressed heterologously in S. cerevisiae, FAT-5 rescues the fatty acid auxotrophy of the yeast delta-9 desaturase mutant ole1.
(2) Lipid metabolism	50	WBGene00016274	C30G12.2	C30G12.2	6.07258	13.2135	6.74	4.45e-05	0.000126	not known	short-chain dehydrogenase	none available
(2) Lipid metabolism	68	WBGene00001387	F15B9.1	far-3	5.87998	11.9134	10.4	8.88e-07	7.71e-06	Fatty Acid/Retinol binding protein		none available
(2) Lipid metabolism	79	WBGene00021703	Y48G9A.10	cpt-3	1.80421	10.9181	5.13	0.000408	0.000824	Carnitine Palmitoyl Transferase		none available
(2) Lipid metabolism	103	WBGene00012202	W02B12.4	W02B12.4	2.46765	9.94904	21.6	6.89e-10	1.07e-06	not known	carboxylesterase	none available
(2) Lipid metabolism	115	WBGene00010296	F59A1.10	dgat-2	9.74007	9.44013	21.1	8.71e-10	1.1e-06	acyl-CoA:DiacylGlycerol AcylTransferase		none available
(2) Lipid metabolism	122	WBGene00017336	F10D2.11	ugt-41	7.73868	9.24612	10.8	6.34e-07	6.42e-06	UDP-GlucuronosylTransferase		none available
(2) Lipid metabolism	149	WBGene00008565	F08A8.2	F08A8.2	4.82246	8.41087	8.64	4.95e-06	2.39e-05	not known	acyl-CoA dehydrogenase/oxidase	none available
(2) Lipid metabolism	175	WBGene00008629	F09F3.9	cpt-5	3.51457	7.69543	5.92	0.000132	0.000312	Carnitine Palmitoyl Transferase		none available
(2) Lipid metabolism	177	WBGene00022498	ZC8.1	hsd-2	0.118138	7.67343	4.67	0.000814	0.00152	HydroxySteroid Dehydrogenase homolog		The ZC8.1 gene encodes a homolog of the human gene 3BH1, which when mutated leads to giant cell hepatitis (OMIM:231100).
(2) Lipid metabolism	186	WBGene00008621	F09C8.1	F09C8.1	4.23975	7.47357	6.16	9.59e-05	0.00024	not known	lipase	none available
(2) Lipid metabolism	205	WBGene00017443	F13H8.11	F13H8.11	1.68605	7.23535	8.7	4.65e-06	2.29e-05	not known	lipase	none available
(2) Lipid metabolism	241	WBGene00009773	F46B6.8	lipl-2	7.29358	6.76573	8.37	6.65e-06	2.93e-05	LIPase Like		none available
(2) Lipid metabolism	244	WBGene00019886	R05D8.9	R05D8.9	0.219332	6.71674	3.67	0.00409	0.0065	not known	short-chain dehydrogenase	none available
(2) Lipid metabolism	277	WBGene00019978	R09B5.6	hacd-1	20.635	6.42709	8.12	8.7e-06	3.59e-05	Hydroxy-Acyl-CoA Dehydrogenase		none available
(2) Lipid metabolism	297	WBGene00008985	F20G2.1	F20G2.1	0.225378	6.30937	3.68	0.00407	0.00647	not known	short-chain dehydrogenase	none available
(2) Lipid metabolism	311	WBGene00015335	C02D5.1	acdh-6	0.165263	6.21604	5.65	0.000192	0.000428	Acyl CoA DeHydrogenase		none available
(2) Lipid metabolism	312	WBGene00001578	R12A1.4	ges-1	21.5032	6.21237	13.7	6.26e-08	2.37e-06	abnormal Gut ESterase		ges-1 encodes a gut-specific type B carboxylesterase; by homology, GES-1 hydrolyzes carboxylic ester substrates to yield an alcohol and a carboxylic anion, however, loss of GES-1 activity via mutation or RNAi does not result in any obvious abnormalities; GES-1 is expressed solely in the intestinal, or E, lineage from the 4 E-cell stage of gut development through adulthood; GES-1 contains a C-term…
(2) Lipid metabolism	313	WBGene00011362	T02B5.1	T02B5.1	2.18264	6.20415	6.52	5.89e-05	0.000159	not known	carboxylesterase	none available
(2) Lipid metabolism	316	WBGene00001390	W02A2.2	far-6	25.8731	6.18205	16.5	1.01e-08	1.53e-06	Fatty Acid/Retinol binding protein		none available
(2) Lipid metabolism	330	WBGene00015692	C10H11.3	ugt-25	5.70971	6.0658	8.51	5.68e-06	2.63e-05	UDP-GlucuronosylTransferase		none available
(2) Lipid metabolism	332	WBGene00003812	F55B12.5	nrf-5	17.7839	6.06003	18.6	3.05e-09	1.33e-06	Nose Resistant to Fluoxetine		nrf-5 encodes a lipid-binding protein that is related to mammalian cholesterol-ester-binding proteins; nrf-5 was identified in screens for genes that confer resistance to the action of fluoxetine, and appears to play a role in transporting hydrophobic molecules from the intestine to other tissues; NRF-5 also functions with CED-7 and TTR-52 to mediate phosphatidylserine transfer from apoptotic cel…
(2) Lipid metabolism	350	WBGene00009824	F47G4.3	gpdh-1	5.18723	5.97485	5.42	0.000268	0.000572	Glycerol-3-Phosphate DeHydrogenase		gpdh-1 encodes one of two C. elegans glycerol 3-phosphate dehydrogenases; gpdh-1 mRNA expression is upregulated in response to hypertonicity, suggesting that GPDH-1 does play a role in osmotic stress adaptation in C. elegans via glycerol biosynthesis; regulation of gpdh-1 expression is controlled, in part, by a pathway that includes the OSM-8 mucin and the PTR-23 Patched-like receptor.
(2) Lipid metabolism	356	WBGene00020016	R11G11.14	lipl-3	1.18391	5.9407	4.55	0.00099	0.00181	LIPase Like		none available
(2) Lipid metabolism	359	WBGene00020007	R11F4.1	R11F4.1	25.7285	5.92181	13.5	7.39e-08	2.41e-06	not known		The R11F4.1 gene encodes a putative glycerol kinase and is orthologous to human glycerol kinase (GK); glycerol kinase catalyses the phosphorylation of glycerol to glycerol-3 phosphate; in elegans, glycerol kinase is enriched in the dauer stage and is one of several genes involved in energy metabolism that are upregulated, when worms are grown in a nutrient deficient medium.
(2) Lipid metabolism	371	WBGene00008567	F08A8.4	F08A8.4	11.8803	5.87485	11.4	3.58e-07	4.88e-06	not known	peroxisomal acyl-CoA oxidase/dehydrogenase	none available
(2) Lipid metabolism	384	WBGene00019060	F58F9.7	F58F9.7	14.0886	5.7901	8.42	6.28e-06	2.82e-05	not known	peroxisomal acyl-CoA oxidase/dehydrogenase	none available
(2) Lipid metabolism	402	WBGene00019967	R08F11.3	cyp-33C8	3.67668	5.70852	8.57	5.35e-06	2.52e-05	CYtochrome P450 family		none available
(2) Lipid metabolism	404	WBGene00010684	K08F9.1a	K08F9.1	0.26072	5.70051	5.56	0.000217	0.000477	not known	sugar transporter	none available
(2) Lipid metabolism	405	WBGene00013855	ZC116.3	ZC116.3	7.26422	5.69168	13.3	8.11e-08	2.52e-06	not known		ZC116.3 is orthologous to the human gene CUBILIN (CUBN; OMIM:602997), which when mutated leads to hereditary megaloblastic anaemia 1 (OMIM:261100).
(2) Lipid metabolism	419	WBGene00015694	C10H11.5	ugt-27	0.0962121	5.63321	4.93	0.000547	0.00107	UDP-GlucuronosylTransferase		none available
(2) Lipid metabolism	420	WBGene00000213	W03G1.7a	asm-3	8.66922	5.63079	3.04	0.0121	0.0173	Acid SphingoMyelinase		none available
(2) Lipid metabolism	431	WBGene00000966	F55A12.4a	dhs-2	5.1111	5.58657	12.8	1.22e-07	2.94e-06	DeHydrogenases, Short chain		dhs-2 encodes a short-chain dehydrogenase predicted to be mitochondrial.
(2) Lipid metabolism	437	WBGene00019515	K08B4.3	ugt-19	5.3344	5.54987	17	7.21e-09	1.52e-06	UDP-GlucuronosylTransferase		none available
(2) Lipid metabolism	450	WBGene00010769	K11D2.2	asah-1	16.077	5.49208	3.73	0.00372	0.00597	AcylSphingosine AmidoHydrolase		K11D2.2 is orthologous to the human gene N-ACYLSPHINGOSINE AMIDOHYDROLASE (ASAH; OMIM:228000), which when mutated leads to Farber lipogranulomatosis.
(2) Lipid metabolism	458	WBGene00000905	T13C5.1a	daf-9	0.281718	5.46563	2.98	0.0134	0.019	abnormal DAuer Formation		daf-9 encodes a cytochrome P450 of the CYP2 subfamily that by homology is predicted to function as a steroidogenic or fatty acid hydroxylase; DAF-9 likely functions cell nonautonomously in hypodermal and neuronal cells to produce, for the DAF-12 nuclear receptor, a lipophilic hormone whose presence is necessary for bypassing entry into the alternative L3/dauer larval stage and promoting reproduct…
(2) Lipid metabolism	459	WBGene00015295	C01C10.3	acl-12	10.1522	5.45932	6.31	7.85e-05	0.000203	ACyLtransferase-like		none available
(2) Lipid metabolism	463	WBGene00011564	T07C5.1b	ugt-50	9.47993	5.44195	17.3	6.33e-09	1.52e-06	UDP-GlucuronosylTransferase		none available
(2) Lipid metabolism	474	WBGene00016997	D1005.3	cebp-1	10.2104	5.4018	15.5	1.87e-08	1.7e-06	C/EBP (CCAAT/enhancer-binding protein) homolog		cebp-1 encodes a bZip domain-containing protein that is a member of the CCAAT/enhancer-binding proteins (C/EBP) subfamily of bZip proteins; in C. elegans, CEBP-1 functions together with a DLK-1 signaling pathway to effect axon regeneration after laser axotomy in adult neurons; cebp-1 protein and mRNA are located in synapses and axons, and translation of axonal cebp-1 mRNA is upregulated via the D…
(2) Lipid metabolism	497	WBGene00004735	Y47D3B.7	sbp-1	14.2994	5.30055	16.9	7.87e-09	1.52e-06	Sterol regulatory element Binding Protein		sbp-1 encodes a basic helix-loop-helix (bHLH) transcription factor homologous to the mammalian Sterol Regulatory Element Binding Proteins (SREBPs, OMIM:184756, overexpression of nuclear form of SREBP-1c is associated with insulin resistance and features of congenital generalized lipodystrophy); in C. elegans, SBP-1 activity is required for normal lipid metabolism and wild-type levels of lipogenic…
(2) Lipid metabolism	501	WBGene00008167	C48B4.1	C48B4.1	8.54282	5.29051	7.98	1.03e-05	4.06e-05	not known	peroxisomal acyl-CoA oxidase/dehydrogenase	none available
(2) Lipid metabolism	505	WBGene00007175	B0395.3	B0395.3	25.4014	5.28383	14.9	2.79e-08	1.92e-06	not known	carnitine O-acetyltransferase	B0395.3 is orthologous to the human gene CHOLINE ACETYLTRANSFERASE ISOFORM R (CHAT; OMIM:118490), which when mutated leads to disease.
(2) Lipid metabolism	514	WBGene00004045	K10F12.3a	pll-1	2.94486	5.26513	14.5	3.59e-08	2.03e-06	PhosphoLipase C Like		none available
(2) Lipid metabolism	522	WBGene00001158	F01G10.3a	ech-9	2.3602	5.24175	2.59	0.0263	0.0353	Enoyl-CoA Hydratase		none available
(2) Lipid metabolism	531	WBGene00008486	F01D4.2	ugt-44	21.2372	5.21372	13.5	7.04e-08	2.41e-06	UDP-GlucuronosylTransferase		none available
(2) Lipid metabolism	551	WBGene00016862	C52A10.1	C52A10.1	10.1978	5.15187	12.9	1.14e-07	2.86e-06	not known	carboxylesterase	none available
(2) Lipid metabolism	552	WBGene00000370	Y73F8A.6	ccg-1	23.2853	5.14904	13.8	5.73e-08	2.31e-06	Conserved Cysteine/Glycine domain protein	lipid transport	none available
(2) Lipid metabolism	558	WBGene00010336	F59F4.1	F59F4.1	4.3652	5.1358	8.95	3.6e-06	1.94e-05	not known	peroxisomal acyl-CoA oxidase/dehydrogenase	none available
(2) Lipid metabolism	566	WBGene00008332	C55A6.3	C55A6.3	0.665437	5.11115	4.24	0.00162	0.00282	not known	short-chain dehydrogenase	none available
(2) Lipid metabolism	595	WBGene00019965	R08F11.1	R08F11.1	15.5547	5.04647	9.67	1.76e-06	1.19e-05	not known	glucosylceramidase	none available
(2) Lipid metabolism	605	WBGene00010157	F56G4.1	oac-34	0.210573	5.01504	3.96	0.00254	0.00422	O-ACyltransferase homolog		none available
(2) Lipid metabolism	615	WBGene00020509	T14F9.3	hex-1	20.6404	5.00039	11.6	3.22e-07	4.64e-06	HEXosaminidase		hex-1 encodes a beta-N-acetylhexosaminidase that is orthologous to the human gene CERVICAL CANCER PROTO-ONCOGENE 7 (HEXB; OMIM:606873), which when mutated leads to disease.
(2) Lipid metabolism	618	WBGene00017478	F15A8.6	F15A8.6	4.37501	4.97884	7.9	1.12e-05	4.31e-05	not known	carboxylesterase	none available
(2) Lipid metabolism	623	WBGene00001559	F45H7.2a	gei-1	9.0859	4.96296	12.7	1.32e-07	2.98e-06	GEX Interacting protein	lipid transfer	gei-1 encodes a protein containing a RhoGAP domain and a START (StAR-related lipid-transfer) domain and interacts with GEX-2 in yeast two-hybrid assays.
(2) Lipid metabolism	628	WBGene00000212	ZK455.4	asm-2	3.94653	4.95289	5.66	0.00019	0.000425	Acid SphingoMyelinase		asm-2 encodes a protein similar to human acid sphingomyelinase (ASM) or sphingomyelin phosphodiesterase 1; the ASM-2 protein has a putative secretory signal peptide at the N-terminus, saposin-like and proline-rich domains and putative N-linked glycosylation sites; asm-2 shows phosphodiesterase activity when expressed in COS-7 cells; like mammalian ASM, asm-2 is probably both intracellular and sec…
(2) Lipid metabolism	644	WBGene00011832	T19B10.3	T19B10.3	9.64567	4.90387	17.9	4.32e-09	1.41e-06	Beta GALactosidase homolog		The T19B10.3 gene encodes an ortholog of the human gene GALACTOSIDASE, BETA 1 (GLB1), which when mutated leads to gangliosidosis type I (OMIM:230500).
(2) Lipid metabolism	648	WBGene00022743	ZK430.8	mlt-7	9.42161	4.89843	12.4	1.63e-07	3.29e-06	MoLTing defective		mlt-7 encodes an animal heme peroxidase; MLT-7 is required for formation of the C. elegans cuticle and normal molting; specifically, MLT-7 functions in combination with BLI-3/DUOX for proper cross-linking of cuticular collagens; when expressed in vitro, MLT-7 exhibits peroxidase activity; MLT-7 is expressed in the hypodermis, which synthesizes the cuticle, at each larval molt.
(2) Lipid metabolism	657	WBGene00002255	F40F4.4a	lbp-3	16.6894	4.88186	9.21	2.75e-06	1.61e-05	Lipid Binding Protein		lbp-3 encodes a predicted secreted fatty acid binding protein (FABP) that is similar to the Ascaris suum secreted FABP As-p18; by homology, LBP-3 is predicted to function in sequestering or transporting small hydrophobic molecules such as lipids and steroid hormones; an lbp-3::gfp promoter fusion is expressed in the embryo, with expression seen in presumptive hypodermal cells by the comma stage a…
(2) Lipid metabolism	659	WBGene00010790	K12G11.3	sodh-1	17.3889	4.87398	3.78	0.00343	0.00555	SOrbitol DeHydrogenase family		none available
(2) Lipid metabolism	665	WBGene00020341	T08B1.4a	T08B1.4	4.04032	4.86763	11.3	4.09e-07	5.21e-06	not known	lipase	none available
(2) Lipid metabolism	667	WBGene00000973	Y32H12A.3	dhs-9	12.482	4.86465	10.3	9.52e-07	8.05e-06	DeHydrogenases, Short chain		dhs-9 encodes a member of the short-chain dehydrogenases/reductases family (SDR).
(2) Lipid metabolism	672	WBGene00008706	F11E6.1a	gba-3	4.19032	4.85476	18	4.24e-09	1.41e-06	beta-GlucocereBrosidAse		F11E6.1 is homologous to to the human gene GLUCOCEREBROSIDASE (GBA; OMIM:606463), which when mutated leads to Gaucher disease.
(2) Lipid metabolism	707	WBGene00010116	F55F3.2a	F55F3.2	6.59407	4.77937	10.5	7.78e-07	7.08e-06	not known	carboxylesterase	none available
(2) Lipid metabolism	711	WBGene00018984	F56F10.1	F56F10.1	25.489	4.77084	12.4	1.71e-07	3.37e-06	not known		F56F10.1 encodes a predicted carboxypeptidase.
(2) Lipid metabolism	720	WBGene00000983	F35B12.2	dhs-20	7.48423	4.75427	9.66	1.77e-06	1.2e-05	DeHydrogenases, Short chain		dhs-20 encodes a short-chain dehydrogenase predicted to be mitochondrial.
(2) Lipid metabolism	797	WBGene00012970	Y48A6B.9a	Y48A6B.9	4.03711	4.62963	10.1	1.13e-06	8.94e-06	not known	trans-2-enoyl-CoA reductase	none available
(2) Lipid metabolism	798	WBGene00008652	F10D11.6a	F10D11.6	3.4801	4.62614	7.29	2.26e-05	7.39e-05	not known	lipid-binding glycoprotein	none available
(2) Lipid metabolism	799	WBGene00017968	F32A5.2a	F32A5.2	13.4133	4.62432	17.8	4.75e-09	1.46e-06	ShK domain and PerOxidase domain containing protein		none available
(2) Lipid metabolism	812	WBGene00004033	E01H11.1a	pkc-2	12.7781	4.60679	12.4	1.66e-07	3.32e-06	Protein Kinase C		pkc-2 encodes protein kinases similar to the classical protein kinase C family of Ca2+/diacylglycerol-stimulated kinases; when expressed in insect cells, one PKC-2 isoform exhibits Ca2+-dependent serine phosphorylation; PKC-2 isoforms are expressed in neurons, the intestine, muscles cells, and the somatic distal gonad, including the spermatheca; in neurons, PKC-2 localizes to the cell body and to…
(2) Lipid metabolism	816	WBGene00008335	C55A6.6	C55A6.6	1.01102	4.60257	3.66	0.00419	0.00663	not known	short-chain dehydrogenase	none available
(2) Lipid metabolism	826	WBGene00017429	F13D11.4	F13D11.4	2.16834	4.58018	5.61	0.000202	0.000448	not known	steroid dehydrogenase	none available
(2) Lipid metabolism	836	WBGene00008607	F09B12.3	F09B12.3	17.3948	4.57405	15.7	1.61e-08	1.64e-06	not known	phospholipase B-like	none available
(2) Lipid metabolism	839	WBGene00012457	Y17G7B.1	acbp-6	2.71129	4.56766	9.88	1.44e-06	1.04e-05	Acyl-Coenzyme A Binding Protein		acbp-6 encodes a highly conserved protein containing a functional acyl-CoA-binding binding domain required for protein stability and ligand binding; loss of ACBP-6 results in 35-40% reduction in lipid chain unsaturation; ACBP-6::GFP is uniquely expressed in specific head, body and tail neurons.
(2) Lipid metabolism	871	WBGene00001059	F44B9.1a	dpf-6	2.56247	4.51729	4.35	0.00136	0.00241	Dipeptidyl Peptidase Four (IV) family		none available
(2) Lipid metabolism	886	WBGene00013197	Y54E5A.1	ttm-5	5.19602	4.4951	11.4	3.66e-07	4.94e-06	Toxin-regulated Targets of MAPK	fatty acid desaturase	none available
(2) Lipid metabolism	891	WBGene00019404	K05B2.4	K05B2.4	0.982503	4.48169	3.38	0.00673	0.0102	not known	acyl-CoA hydrolase	none available
(2) Lipid metabolism	941	WBGene00010062	F54F3.3	lipl-1	4.5554	4.40638	4.77	0.000698	0.00133	LIPase Like		none available
(2) Lipid metabolism	965	WBGene00001395	W08D2.4a	fat-3	26.5463	4.36609	3.97	0.00252	0.00418	FATty acid desaturase		fat-3 encodes a delta-6 fatty acid desaturase ('linoleoyl-CoA desaturase') containing an N-terminal cytochrome b5 domain that is orthologous to the vertebrate fatty acid desaturases (FADS); FAT-3 expressed in yeast uses linoleic and alpha-linolenic acid as substrates; FAT-3 is absolutely required in vivo for synthesis of delta-6 fatty acids, and also required for fully normal synthesis of C20 fat…
(2) Lipid metabolism	1001	WBGene00000908	F11A1.3a	daf-12	7.84619	4.33557	13.8	5.87e-08	2.31e-06	abnormal DAuer Formation		daf-12 encodes a member of the steroid hormone receptor superfamily that is homologous to human VITAMIN D RECEPTOR (VDR; OMIM:601769, mutated in vitamin D-resistant rickets); daf-12 affects dauer formation downstream of the TGF- and insulin signaling pathways, and affects gonad-dependent adult longevity together with DAF-16, chemosensory signal transduction, and distal tip cell migration and hypo…
(2) Lipid metabolism	1014	WBGene00007082	AH10.1	acs-10	0.246671	4.32246	2.24	0.048	0.0611	fatty Acid CoA Synthetase family		none available
(2) Lipid metabolism	1020	WBGene00008485	F01D4.1a	ugt-43	3.87567	4.31879	7.58	1.61e-05	5.64e-05	UDP-GlucuronosylTransferase		none available
(2) Lipid metabolism	1028	WBGene00044468	Y69A2AL.2	Y69A2AL.2	9.83185	4.31091	7.44	1.9e-05	6.45e-05	not known	phospholipase	none available
(2) Lipid metabolism	1055	WBGene00004059	C44B7.9	pmp-2	10.0027	4.28596	11.1	4.71e-07	5.59e-06	Peroxisomal Membrane Protein related	peroxysomal long chain fatty acyl transporter	none available
(2) Lipid metabolism	1056	WBGene00000138	B0019.1	amx-2	4.85535	4.28542	10.9	5.86e-07	6.16e-06	AMine oXidase family		none available
(2) Lipid metabolism	1063	WBGene00018036	F35C8.5	F35C8.5	12.3156	4.26439	8.35	6.82e-06	2.98e-05	not known	cholesterol hydroxylase	none available
(2) Lipid metabolism	1064	WBGene00022178	Y71H2AM.13	Y71H2AM.13	25.6037	4.26404	16.1	1.28e-08	1.58e-06	not known	carboxylesterase	none available
(2) Lipid metabolism	1094	WBGene00007070	AC3.2	ugt-49	8.56927	4.23013	11.8	2.74e-07	4.23e-06	UDP-GlucuronosylTransferase		none available
(2) Lipid metabolism	1095	WBGene00001385	F02A9.2a	far-1	237.873	4.22884	9.49	2.1e-06	1.33e-05	Fatty Acid/Retinol binding protein		far-1 encodes a fatty acid/retinol binding protein; expressed throughout development with highest expression levels in L3 stage larvae and in adult males.
(2) Lipid metabolism	1132	WBGene00016585	C42C1.7a	oac-59	2.81342	4.18572	7.31	2.23e-05	7.33e-05	O-ACyltransferase homolog		none available
(2) Lipid metabolism	1185	WBGene00016716	C46F4.2	acs-17	12.5923	4.11884	11.9	2.44e-07	3.95e-06	fatty Acid CoA Synthetase family		none available
(2) Lipid metabolism	1186	WBGene00013540	Y75B8A.3	Y75B8A.3	3.43855	4.1184	5.38	0.000282	0.000598	not known	carboxylesterase	none available
(2) Lipid metabolism	1188	WBGene00015965	C18C4.3	ugt-48	4.24159	4.11805	8.43	6.21e-06	2.8e-05	UDP-GlucuronosylTransferase		none available
(2) Lipid metabolism	1195	WBGene00015767	C14C11.3	hex-2	10.6184	4.10983	10.5	7.75e-07	7.06e-06	HEXosaminidase		hex-2 encodes a beta-N-acetylhexosaminidase.
(2) Lipid metabolism	1204	WBGene00011768	T14D7.2	oac-46	7.3431	4.10209	10.4	9.27e-07	7.94e-06	O-ACyltransferase homolog		T14D7.2 encodes an acyltransferase; large-scale RNAi experiments indicate that T14D7.2 activity is required for egg laying, coordination locomotion, and normal vulval morphology.
(2) Lipid metabolism	1207	WBGene00022191	Y71H2B.1	Y71H2B.1	3.82483	4.1013	12.2	1.99e-07	3.52e-06	not known	acyl-CoA/fatty acid binding	none available
(2) Lipid metabolism	1208	WBGene00018958	F56C11.6a	F56C11.6	3.35182	4.09848	8.07	9.23e-06	3.75e-05	not known	carboxylesterase	none available
(2) Lipid metabolism	1217	WBGene00018398	F43H9.2a	sptl-2	6.23491	4.08697	8.56	5.41e-06	2.54e-05	Serine Palmitoyl Transferase famiLy		none available
(2) Lipid metabolism	1225	WBGene00000981	C45B11.3	dhs-18	8.13398	4.07961	9.9	1.42e-06	1.02e-05	DeHydrogenases, Short chain		dhs-18 encodes a predicted short-chain dehydrogenase.
(2) Lipid metabolism	1243	WBGene00021709	Y49C4A.8a	ugt-29	5.00351	4.06324	10.6	7.42e-07	6.95e-06	UDP-GlucuronosylTransferase		none available
(2) Lipid metabolism	1254	WBGene00008986	F20G2.2	F20G2.2	13.0683	4.05212	9.19	2.83e-06	1.64e-05	not known	dehydrogenase	none available
(2) Lipid metabolism	1264	WBGene00019653	K11G9.2	K11G9.2	3.55616	4.04172	9.92	1.39e-06	1.01e-05	not known	carboxylesterase	none available
(2) Lipid metabolism	1272	WBGene00015067	B0238.1	B0238.1	3.49455	4.03742	7.1	2.88e-05	8.93e-05	not known	carboxylesterase	none available
(2) Lipid metabolism	1277	WBGene00019986	R09F10.1	R09F10.1	9.8302	4.03022	11.3	4.03e-07	5.18e-06	not known	endopeptidase	none available
(2) Lipid metabolism	1301	WBGene00017431	F13H6.3	F13H6.3	11.2559	4.00363	7.25	2.37e-05	7.66e-05	not known	carboxylesterase	none available
(3) ECM	3	WBGene00000551	C50F7.2	clx-1	0.0956779	40.4214	3.81	0.00324	0.00527	CoLlagen sequence X-hybridizing		clx-1 encodes a protein that contains 23 copies of a 15 amino acid repeat, possibly derived from a collagen triplet; there is no transcript evidence for this locus.
(3) ECM	6	WBGene00005016	B0491.2	sqt-1	0.14199	37.1833	6.28	8.14e-05	0.000209	SQuaT		sqt-1 encodes a cuticle collagen; during larval and adult development, sqt-1 activity is required, likely redundantly, for normal cuticle, and hence organismal, morphology; sqt-1 mRNA abundance oscillates during larval development, peaking at one point during each larval stage and peaking again in adults; sqt-1 transcripts are also detected in animals at the L1-L2d molt; in the temporally distinc…
(3) ECM	15	WBGene00000707	F52B11.4	col-133	0.706834	19.3183	4.5	0.00106	0.00193	COLlagen		none available
(3) ECM	17	WBGene00000748	C35B8.1	col-175	0.430827	18.9365	3.94	0.00262	0.00434	COLlagen		none available
(3) ECM	19	WBGene00004394	Y57A10A.11	rol-1	0.701301	18.4218	3.27	0.00808	0.012	ROLler: helically twisted, animals roll when moving		rol-1 encodes a nematode cuticular collagen required for normal body morphology at the adult stage of development; rol-1 expression is under the control of the heterochronic pathway, as heterochronic mutants that synthesize adult cuticle early produce animals that roll as larvae, while heterochronic mutants that fail to execute normal adult development never display the roller phenotype.
(3) ECM	20	WBGene00005017	C01B12.1	sqt-2	0.165263	18.4094	5.72	0.000175	0.000397	SQuaT		sqt-2 encodes a collagen required for normal alae formation and body morphology; sqt-2 mutants exhibit a slightly dumpy phenotype and the bodies of mutants are helically twisted.
(3) ECM	24	WBGene00000613	C27H5.5a	col-36	0.0491649	17.4914	4.49	0.00108	0.00196	COLlagen		col-36 encodes a collagen protein; expressed during the L1 to L2 and L2 to dauer larval stage molts.
(3) ECM	32	WBGene00000256	Y73B6BL.34	bli-6	1.85814	15.6282	7.24	2.42e-05	7.78e-05	BLIstered cuticle		bli-6 encodes a collagen involved in adult cuticle structure.
(3) ECM	34	WBGene00000711	C52D10.13	col-138	1.68214	15.041	4.85	0.000625	0.0012	COLlagen		none available
(3) ECM	36	WBGene00001074	F30B5.1	dpy-13	1.7659	14.6699	5.91	0.000133	0.000315	DumPY: shorter than wild-type		dpy-13 encodes a member of the collagen superfamily containing 20 copies of the collagen triple helix repeat; transcipt levels oscillate, peaking once during each larval stage.
(3) ECM	38	WBGene00000649	F11G11.12	col-73	1.33567	14.6189	4.78	0.00069	0.00131	COLlagen		none available
(3) ECM	40	WBGene00000639	ZK265.2	col-63	0.436731	14.5405	3.48	0.00567	0.00871	COLlagen		none available
(3) ECM	42	WBGene00000715	T15B7.4	col-142	22.2773	14.2762	12.4	1.62e-07	3.29e-06	COLlagen		none available
(3) ECM	49	WBGene00000729	F57B7.3	col-156	0.0962121	13.2354	3.92	0.00273	0.00451	COLlagen		none available
(3) ECM	63	WBGene00001066	Y41E3.2	dpy-4	1.68449	12.2362	4.63	0.000866	0.0016	DumPY: shorter than wild-type		dpy-4 encodes a cuticle collagen; dpy-4 activity is required for normal body morphology, locomotion, and larval development.
(3) ECM	65	WBGene00000653	M195.1	col-77	1.28818	12.1985	4	0.00239	0.004	COLlagen		col-77 encodes a cuticular collagen; as loss of col-77 activity via RNAi screens results in no obvious defects, the precise role of col-77 in C. elegans development and/or behavior is not yet known.
(3) ECM	73	WBGene00001067	F27C1.8	dpy-5	1.28439	11.3371	4.17	0.00182	0.00312	DumPY: shorter than wild-type		dpy-5 encodes a Group I cuticle procollagen; dpy-5 activity is required for wild-type body length, cuticle structure (width of the annuli), postembryonic growth rates, and reproduction; dpy-5 is described as an intermediate collagen gene, as its mRNA, which is present in all larval stages, adults, and dauer larvae, increases in abudance two hours prior to the secretion of each new cuticle; a dpy-…
(3) ECM	75	WBGene00000722	B0024.1	col-149	1.98068	11.2991	8.67	4.82e-06	2.35e-05	COLlagen		none available
(3) ECM	76	WBGene00000626	K09H9.3	col-49	0.466726	11.2944	3.34	0.00717	0.0108	COLlagen		col-49 encodes a cuticle collagen.
(3) ECM	77	WBGene00000704	F08G5.4	col-130	0.480948	11.0531	4.76	0.000714	0.00135	COLlagen		none available
(3) ECM	78	WBGene00000646	H17B01.2	col-70	0.191793	11.0299	4.28	0.00151	0.00265	COLlagen		none available
(3) ECM	80	WBGene00000712	F41F3.4	col-139	20.3743	10.8899	5.5	0.000238	0.000515	COLlagen		none available
(3) ECM	82	WBGene00000720	T06E4.4	col-147	0.786913	10.8558	7.22	2.47e-05	7.92e-05	COLlagen		none available
(3) ECM	93	WBGene00000657	F38A3.1	col-81	12.3469	10.3623	5.8	0.000156	0.00036	COLlagen		none available
(3) ECM	101	WBGene00000616	C09G5.4	col-39	2.65907	10.0727	9.58	1.92e-06	1.26e-05	COLlagen		col-39 encodes a collagen that is individually dispensable for viability and gross morphology in mass RNAi screens; the amino- and carboxyl-terminal cysteine-rich regions of COL-39 are most closely related to those of COL-8, COL-19, and COL-35.
(3) ECM	104	WBGene00000730	T11F9.9	col-157	0.14199	9.93392	3.06	0.0118	0.0169	COLlagen		none available
(3) ECM	110	WBGene00000694	Y11D7A.11	col-120	0.383572	9.71606	3.13	0.0104	0.0152	COLlagen		none available
(3) ECM	118	WBGene00000703	M18.1a	col-129	21.7955	9.33927	4.05	0.00218	0.00368	COLlagen		none available
(3) ECM	121	WBGene00000606	F11G11.10	col-17	0.613155	9.25705	3.38	0.00677	0.0102	COLlagen		col-17 encodes a collagen which is expressed in all developmental stages except eggs, like col-15, col-16, and col-20; collagen genes with this expression pattern may be used for synthesis of cuticles after the L1 stage (e.g., the L4 cuticle).
(3) ECM	125	WBGene00000683	Y38C1BA.3	col-109	0.588331	9.18244	3.53	0.00523	0.0081	COLlagen		col-109 encodes a cuticular collagen; loss of col-109 via large-scale RNAi screens results in no obvious defects.
(3) ECM	127	WBGene00000699	C29F4.1	col-125	2.77715	9.14191	6.55	5.7e-05	0.000155	COLlagen		none available
(3) ECM	133	WBGene00000759	E03G2.4	col-186	0.197527	8.99101	4.09	0.00208	0.00352	COLlagen		none available
(3) ECM	137	WBGene00000672	ZK1010.7	col-97	1.35176	8.85165	3.89	0.00287	0.00473	COLlagen		col-97 encodes a cuticular collagen; loss of col-97 activity via large-scale RNAi screens results in defects in body morphology and locomotion.
(3) ECM	138	WBGene00000753	C44C10.1	col-180	1.21818	8.77948	8.87	3.93e-06	2.05e-05	COLlagen		none available
(3) ECM	148	WBGene00000684	F19C7.7	col-110	0.157417	8.42968	4.36	0.00133	0.00236	COLlagen		none available
(3) ECM	153	WBGene00000681	C34H4.4a	col-107	2.61459	8.19736	5.9	0.000136	0.000321	COLlagen		none available
(3) ECM	159	WBGene00000599	B0222.8	col-10	2.07427	8.07522	9.38	2.34e-06	1.42e-05	COLlagen		col-10 encodes a collagen protein; expressed exclusively in hypodermal cells
(3) ECM	164	WBGene00000665	C29E4.1	col-90	0.191793	7.9504	4.84	0.000631	0.00121	COLlagen		none available
(3) ECM	170	WBGene00000663	W05G11.3	col-88	0.462793	7.81795	2.77	0.0195	0.0267	COLlagen		none available
(3) ECM	171	WBGene00004397	T01B7.7	rol-6	0.335503	7.76828	4.54	0.000997	0.00182	ROLler: helically twisted, animals roll when moving		The rol-6 gene encodes a cuticle collagen related to human collagen alpha 1 (III) chain precursor (OMIM:120180), and is required for normal cuticular morphology; ROL-6 interacts with SQT-1, a closely related cuticle collagen, and is expressed at all stages from L2 to adult with transcripts detected at each of the molts preceding these stages.
(3) ECM	180	WBGene00000667	W05B2.6	col-92	3.85648	7.50251	9.54	1.99e-06	1.28e-05	COLlagen		none available
(3) ECM	181	WBGene00000732	F57B1.3	col-159	24.1703	7.50154	6.13	9.98e-05	0.000248	COLlagen		none available
(3) ECM	184	WBGene00000601	F15H10.1	col-12	1.4064	7.47617	5.95	0.000127	0.000302	COLlagen		col-12 encodes a member of the collagen superfamily containing collagen triple helix repeats (20 copies); expressed throughout development but expression peaks after each larval molt when new cuticle is being secreted and deposited, and after the L4 to adult larval molt.
(3) ECM	190	WBGene00022649	ZK84.1	ZK84.1	3.4658	7.40069	12.3	1.77e-07	3.42e-06	not known	collagen	none available
(3) ECM	192	WBGene00000666	F09G8.6	col-91	0.460933	7.38767	4	0.00239	0.00399	COLlagen		col-91 encodes a cuticle collagen; loss of col-91 via large-scale RNAi results in no obvious defects.
(3) ECM	214	WBGene00000749	ZC373.7	col-176	0.898203	7.12357	6.5	6.07e-05	0.000163	COLlagen		none available
(3) ECM	223	WBGene00004300	F38A3.2	ram-2	7.37529	6.93062	9.56	1.95e-06	1.27e-05	abnormal RAy Morphology		ram-2 encodes a cuticle collagen that interacts with unc-6 to affect ray cell migration, and interacts with unc-5 and unc-6 to affect embryonic viability; also affects ray morphology in males such that the structural cells and the hypodermis of the rays are swollen in mutants.
(3) ECM	230	WBGene00000742	T10E10.5	col-169	0.30512	6.85126	4.62	0.00088	0.00162	COLlagen		none available
(3) ECM	261	WBGene00000740	T10E10.2	col-167	0.432314	6.54855	4.19	0.00176	0.00303	COLlagen		none available
(3) ECM	262	WBGene00000647	Y49F6B.10	col-71	3.17765	6.54795	4.23	0.00164	0.00284	COLlagen		none available
(3) ECM	269	WBGene00004398	ZK1290.3a	rol-8	1.52727	6.4971	5.08	0.00044	0.000882	ROLler: helically twisted, animals roll when moving		rol-8 encodes a collagen that is enriched in dauer larvae; mutations cause adults to become left-handed rollers.
(3) ECM	276	WBGene00000669	W05B2.1	col-94	11.4513	6.43169	15.9	1.46e-08	1.64e-06	COLlagen		none available
(3) ECM	318	WBGene00000603	C46A5.3a	col-14	1.1394	6.177	2.85	0.0168	0.0233	COLlagen		col-14 encodes a collagen protein that affects vulval morphology in a large-scale RNAi screen; mRNA expressed in embryos and transcript levels peak during each larval stage.
(3) ECM	325	WBGene00000602	F15H10.2	col-13	0.421824	6.09515	3.48	0.00571	0.00876	COLlagen		col-13 encodes a collagen which is expressed in all stages of development, like sqt-3 (col-1), col-3, col-10, col-11, col-12, and col-14; collagen genes with this expression profile may be specifically required to construct the L1 cuticle (and, perhaps, less specifically required for cuticles at other stages); the amino- and carboxyl-terminal cysteine-rich regions of COL-13 are most closely relat…
(3) ECM	326	WBGene00000739	T07H6.3a	col-166	8.23347	6.0813	18.5	3.18e-09	1.34e-06	COLlagen		none available
(3) ECM	327	WBGene00000678	F58F6.1	col-104	1.4488	6.07802	2.99	0.0132	0.0188	COLlagen		none available
(3) ECM	333	WBGene00003169	E03G2.3	mec-5	5.59728	6.05691	16.9	7.9e-09	1.52e-06	MEChanosensory abnormality		mec-5 encodes a collagen unique in the number of Gly-X-Y repeats and in the composition of amino acids surrounding these repeats; MEC-5 is required for normal mechanosensory response to gentle touch and for the proper functioning of the touch receptor neurons; mec-5 interacts genetically with mec-4 and mec-10 which encode degenerins (ion channels) expressed in the touch neurons, mec-9, which enco…
(3) ECM	346	WBGene00000717	B0222.6	col-144	2.11627	5.99153	10.1	1.12e-06	8.87e-06	COLlagen		none available
(3) ECM	348	WBGene00000638	C15A11.6	col-62	0.128201	5.98436	4.55	0.000986	0.0018	COLlagen		none available
(3) ECM	364	WBGene00003057	ZK836.1	lon-3	0.398249	5.90233	4.18	0.00179	0.00308	LONg		lon-3 encodes a cuticle collagen; during development, lon-3 acts downstream of the TGF-beta signaling pathway to specify body length; lon-3 reporter fusions are expressed in hypodermal cells and LON-3 appears to localize to the surface of the animal, consistent with a role in cuticle formation.
(3) ECM	387	WBGene00000618	T10B10.1	col-41	0.276321	5.77035	3.31	0.00758	0.0113	COLlagen		col-41 encodes a cuticle collagen.
(3) ECM	650	WBGene00000611	F36A4.10	col-34	3.74876	4.89583	15.4	2.03e-08	1.73e-06	COLlagen		col-34 encodes a cuticle collagen protein and is a critical component of male tail cuticle organization affecting ray morphology.
(3) ECM	683	WBGene00000615	F54C9.4	col-38	2.35789	4.82477	2.82	0.0176	0.0244	COLlagen		col-38 encodes a member of the collagen superfamily containing collagen triple helix repeats (20 copies) required for normal body morphology.
(3) ECM	807	WBGene00000718	B0222.7	col-145	0.867011	4.61126	2.28	0.0453	0.058	COLlagen		none available
(3) ECM	811	WBGene00001070	C31H2.2	dpy-8	0.557936	4.60681	4.79	0.000678	0.00129	DumPY: shorter than wild-type		dpy-8 encodes a collagen with a nematode-specific N-terminal domain that is required for normal body morphology and (perhaps) for a normal embryonic cell division rate; dpy-8 interacts genetically with emb-5 and glp-1.
(3) ECM	882	WBGene00000083	F08C6.1a	adt-2	21.5218	4.50338	14.5	3.55e-08	2.01e-06	ADAMTS family		adt-2 encodes a member of the ADAMTS (a disintegrin and metalloprotease with thrombospodin motif) family of secreated metalloproteases; ADT-2 binds to extracellular matrix and is involved in remodeling of the extracellular matrix; homozygous adt-2 mutants die at the 3-fold stage of embryogenesis or during hatching; adult worms are about 20% reduced body length as compared to the wild type; adt-2 …
(3) ECM	909	WBGene00000728	F55C10.3	col-155	4.44502	4.44858	7.96	1.04e-05	4.12e-05	COLlagen		none available
(3) ECM	938	WBGene00000252	F59E12.12	bli-2	0.3844	4.40751	3.61	0.00456	0.00717	BLIstered cuticle		A cuticle collagen involved in strut assembly in the adult cuticle.
(3) ECM	954	WBGene00000692	T11B7.3a	col-118	7.13666	4.38164	10.8	5.95e-07	6.19e-06	COLlagen		none available
(3) ECM	1049	WBGene00000671	Y41C4A.19	col-96	9.35713	4.29077	16	1.39e-08	1.63e-06	COLlagen		none available
(3) ECM	1136	WBGene00000527	C36B1.1a	cle-1	18.2682	4.17755	15.3	2.1e-08	1.73e-06	CoLlagen with Endostatin domain		cle-1 encodes the only vertebrate type XV/XVIII collagen homolog in C. elegans and generates multiple developmentally regulated protein isoforms via alternative splicing; cle-1 is required for neuron migrations, including the migration of the HSN, ALM and AVM neurons, axon guidance of the sensory and motor neurons, distal tip cell migration, and for proper morphogenesis of the mail tail; cle-1 is…
(3) ECM	1205	WBGene00001263	K04H4.1a	emb-9	220.899	4.10192	9.62	1.84e-06	1.22e-05	abnormal EMBroygenesis		emb-9 encodes the alpha-1 chain of Type IV basement membrane collagen most closely equivalent to human COL4A1 (OMIM:120130) on the basis of biological function; EMB-9 forms heterotrimeric Type IV collagen with LET-2, the alpha-2-like chain, and is required for the assembly and/or secretion of LET-2; EMB-9 is essential for embryonic morphogenesis, particularly epidermal elongation, and for larval …
(3) ECM	1279	WBGene00000641	K08C9.4	col-65	0.790934	4.02875	2.3	0.0434	0.0558	COLlagen		none available
(4) Transcription	196	WBGene00015497	C05G6.1	nhr-76	4.73307	7.3044	11.5	3.41e-07	4.76e-06	Nuclear Hormone Receptor family		none available
(4) Transcription	395	WBGene00003610	ZC410.1a	nhr-11	2.21141	5.74158	13.9	5.26e-08	2.3e-06	Nuclear Hormone Receptor family		nhr-11 encodes a member of the superfamily of nuclear receptors, which is one of the most abundant class of transcriptional regulators; nuclear receptors have a well conserved DNA binding domain and a less conserved C-terminal ligand binding domain.
(4) Transcription	469	WBGene00001441	K03C7.2a	fkh-9	9.46592	5.41558	13.9	5.57e-08	2.31e-06	ForKHead transcription factor family		fkh-9 encodes a member of the forkhead domain transcription factor family.
(4) Transcription	550	WBGene00018266	F41B5.10	nhr-183	0.614658	5.15287	5.9	0.000136	0.00032	Nuclear Hormone Receptor family		none available
(4) Transcription	554	WBGene00077521	F45H11.6	maf-1	1.34522	5.14574	6.81	4.09e-05	0.000118	MAF (MusculoAponeurotic Fibrosarcoma) transcription factor homolog		none available
(4) Transcription	654	WBGene00011099	R07B7.15	nhr-208	0.161367	4.89205	2.48	0.0317	0.0419	Nuclear Hormone Receptor family		none available
(4) Transcription	810	WBGene00001182	T22B7.1a	egl-13	3.60119	4.6071	7.71	1.39e-05	5.07e-05	EGg Laying defective		egl-13 encodes a SOX domain transcription factor; egl-13 is required for maintenance of the uterine pi cell fate; mutations in egl-13 affect the cell fusion process that makes the vulval-uterine connection and consequently egg laying; egl-13 is expressed in the pi cells, transiently expressed in the rho lineage, in the anchor cell following fusion, and in neurons, body wall muscles, and intestina…
(4) Transcription	1038	WBGene00003670	H10E21.3a	nhr-80	6.0361	4.29987	15.1	2.37e-08	1.8e-06	Nuclear Hormone Receptor family		nhr-80 encodes a nuclear hormone receptor, expressed in the intestine, that regulates expression of the delta-9 desaturases FAT-5/-6/-7, and thus regulates fatty acid metabolism; NHR-80 is fully required for any expression of FAT-7, full expression of FAT-5/-6, viability in the absence of FAT-6, and transcriptional hyperactivation of fat-7 in the absence of FAT-6, and for a fully normal adult lif…
(4) Transcription	1044	WBGene00000441	ZC64.3a	ceh-18	4.45768	4.29452	14.1	4.79e-08	2.26e-06	C. Elegans Homeobox		ceh-18 encodes a POU-class homeodomain transcription factor; CEH-18 is required in hermaphrodites for specific aspects of gonadal sheath cell differentiation, such as normal cell shape and position, that are essential for negative regulation of oocyte meiotic maturation by the sheath cells; in this process, CEH-18 functions in parallel with the VAB-1/Ephrin receptor as part of a sperm-sensing che…
(4) Transcription	1178	WBGene00012330	W07G1.3	zip-3	12.4253	4.12914	5.65	0.000192	0.00043	bZIP transcription factor family		zip-3 encodes a bZip transcription factor.
(4) Transcription	1189	WBGene00001345	F29G9.4a	fos-1	5.8643	4.11609	12.2	1.87e-07	3.44e-06	FOS (B-Zip transcription factor) homolog		fos-1 encodes two basic region-leucine zipper (bZip) transcription factors, FOS-1A and FOS-1B, that are the sole C. elegans orthologs of the fos bZip transcription factor family; during hermaphrodite development, FOS-1A activity is required cell autonomously in the gonadal anchor cell for basement-membrane removal and subsequent anchor cell invasion of the vulval epithelium; in addition, fos-1 ac…
(4) Transcription	1199	WBGene00012101	T27F2.4	zip-10	2.86933	4.10612	6.75	4.41e-05	0.000125	bZIP transcription factor family		none available
(4) Transcription	1218	WBGene00012005	T24H10.7a	jun-1	12.5446	4.08692	12.9	1.09e-07	2.8e-06	JUN transcription factor homolog		jun-1 encodes a basic-leucine zipper (bZIP) transcription factor that is the C. elegans JUN homolog; jun-1 activity is essential for regulation of ovulation, and thus normal levels of fertility; in regulating ovulation, JUN-1 functions with FOS-1 to regulate expression of plc-1 which encodes a phospholipase C essential for IP3 production and ovulation; in addition, JUN-1 interacts with FOS-1 in v…
(4) Transcription	1234	WBGene00003607	F33D4.1a	nhr-8	5.57014	4.07046	4.21	0.00171	0.00295	Nuclear Hormone Receptor family		The nhr-8 gene encodes a nuclear hormone receptor homolog; nhr-8(ok186) mutants have abnormally low resistance to the toxins colchicine and chloroquine.
(4) Transcription	1265	WBGene00022423	Y104H12A.1a	nhr-41	5.62162	4.04126	12.7	1.32e-07	2.98e-06	Nuclear Hormone Receptor family		nhr-41 encodes a nuclear receptor of the NR2D1 subfamily that is orthologous to the Drosophila DHR78 nuclear receptor essential for the onset of metamorphosis, and the mammalian TR2 and TR4 receptors which are expressed in androgen-sensitive organs and brain tissue, respectively; by homology, NHR-41 likely functions as a transcription factor that, based upon RNAi experiments, plays a role in the …
(5) Other	1	WBGene00014047	ZK666.7	clec-61	0.0491649	56.2461	6.41	6.84e-05	0.000181	C-type LECtin		none available
(5) Other	4	WBGene00005113	R186.2a	srd-35	0.0687769	39.8485	9.47	2.13e-06	1.34e-05	Serpentine Receptor, class D (delta)		none available
(5) Other	5	WBGene00044109	K02E11.10	K02E11.10	0.0687769	37.9639	7.06	2.99e-05	9.21e-05	not known		none available
(5) Other	7	WBGene00017736	F23C8.7	F23C8.7	0.947722	34.1185	15.1	2.33e-08	1.8e-06	not known	kinase	none available
(5) Other	8	WBGene00020674	T22B7.7	T22B7.7	10.8068	32.793	13.1	9.69e-08	2.7e-06	not known		none available
(5) Other	9	WBGene00020741	T23F4.3	T23F4.3	0.117039	30.1784	7.05	3.05e-05	9.34e-05	DieneLactone Hydrolase Domain containing protein		none available
(5) Other	10	WBGene00013972	ZK384.2	scl-20	0.0687769	24.8887	6.5	6.12e-05	0.000164	SCP-Like extracellular protein		scl-20 encodes a predicted extracellular protein that is a member of the C. elegans family of SCP/TAPS domain-containing proteins; SCL-20 is homologous to mammalian GliPR1, a p53 target with proapoptotic activity mediated by an increase in production of reactive oxygen species; loss of scl-20 activity via RNAi in daf-2 mutants and in gld-1;daf-2 doubly mutant animals indicates that, in C. elegans…
(5) Other	11	WBGene00008448	E01G4.6	E01G4.6	0.838387	23.6175	6.4	6.91e-05	0.000182	not known		none available
(5) Other	12	WBGene00011052	R06B9.1	arrd-11	0.107604	22.1519	5.1	0.000427	0.000859	ARRestin Domain protein		none available
(5) Other	14	WBGene00044201	H39E23.3	H39E23.3	0.0491649	19.5729	6.81	4.12e-05	0.000118	not known		none available
(5) Other	18	WBGene00021873	Y54G2A.8a	clec-82	0.216883	18.5668	4.67	0.000813	0.00152	C-type LECtin		none available
(5) Other	21	WBGene00021587	Y46C8AR.1	clec-76	0.0962121	18.2555	7.85	1.19e-05	4.5e-05	C-type LECtin		none available
(5) Other	22	WBGene00009213	F28D1.3	thn-1	0.0687769	17.9406	6.23	8.64e-05	0.000219	THaumatiN family		none available
(5) Other	23	WBGene00138721	C54D10.14a	C54D10.14	0.0962121	17.5514	5.95	0.000126	0.000301	not known		none available
(5) Other	25	WBGene00011305	R186.1	R186.1	0.89269	16.9249	14.1	4.86e-08	2.26e-06	not known		none available
(5) Other	26	WBGene00006952	ZK377.1	wrt-6	0.134591	16.9143	10.9	5.53e-07	6.04e-06	WaRThog (hedgehog-like family)		wrt-6 encodes a hedgehog-like protein, with (from N- to C-terminus) a signal sequence, a Wart domain, an short region of low-complexity sequence, and a Hint/Hog domain; WRT-6 is expressed in sheath and socket cells of anterior sensilla, seam cells, and hypodermis; the Hint/Hog domain is predicted to cut WRT-6 into two halves and then covalently link cholesterol to the C-terminus of the Wart domai…
(5) Other	28	WBGene00015393	C03G6.5	C03G6.5	1.25339	16.2544	9.18	2.84e-06	1.65e-05	not known		none available
(5) Other	29	WBGene00012683	Y39B6A.24	asp-17	2.302	16.0287	11.7	2.88e-07	4.36e-06	ASpartyl Protease		none available
(5) Other	30	WBGene00020326	T07H3.3	math-38	0.344528	16	6.45	6.51e-05	0.000173	MATH (meprin-associated Traf homology) domain containing		none available
(5) Other	31	WBGene00021791	Y51H7C.13	Y51H7C.13	2.18467	15.6987	13.2	8.98e-08	2.64e-06	not known		none available
(5) Other	33	WBGene00010723	K09E4.6	cpg-7	0.157664	15.1229	10.2	1.06e-06	8.59e-06	Chondroitin ProteoGlycan		cpg-7 encodes a small (116-residue), putatively secreted protein with 11 potential chondroitin attachment sites, 6 of them verified by mass spectrometry.
(5) Other	35	WBGene00007218	C01A2.6	C01A2.6	0.0916444	15.0106	4.81	0.000662	0.00127	not known		none available
(5) Other	39	WBGene00007393	C06H5.2	fbxa-157	0.0687769	14.6156	5.92	0.000132	0.000312	F-box A protein		This gene encodes a protein containing an F-box, a motif predicted to mediate protein-protein interactions either with homologs of yeast Skp-1p or with other proteins; this gene's encoded protein also contains an FTH/DUF38 motif, which may also mediate protein-protein interaction.
(5) Other	41	WBGene00015600	C08E3.8	fbxa-165	0.0836647	14.4594	3.69	0.00399	0.00635	F-box A protein		This gene encodes a protein containing an F-box, a motif predicted to mediate protein-protein interactions either with homologs of yeast Skp-1p or with other proteins; this gene's encoded protein also contains an FTH/DUF38 motif, which may also mediate protein-protein interaction.
(5) Other	43	WBGene00007344	C05E7.2	C05E7.2	0.132633	14.1041	3.48	0.00566	0.00869	not known		none available
(5) Other	44	WBGene00008301	C54D10.7	dct-3	0.369339	13.9984	6.81	4.11e-05	0.000118	DAF-16/FOXO Controlled, germline Tumor affecting		none available
(5) Other	46	WBGene00016845	C50F7.5	C50F7.5	4.18786	13.8407	4.87	0.000604	0.00116	not known		none available
(5) Other	47	WBGene00018380	F43C11.3	decr-1.1	0.0687769	13.7037	3.71	0.00383	0.00613	DiEnoyl-CoA Reductase, mitochondria		none available
(5) Other	48	WBGene00006539	T04H1.9	tbb-6	5.84039	13.4822	13.9	5.56e-08	2.31e-06	TuBulin, Beta		none available
(5) Other	51	WBGene00050913	T12B5.14	T12B5.14	0.179341	13.2008	7.36	2.1e-05	6.98e-05	not known		none available
(5) Other	52	WBGene00016556	C40D2.3	math-21	0.0687769	13.0696	6.02	0.000116	0.00028	MATH (meprin-associated Traf homology) domain containing		none available
(5) Other	53	WBGene00009895	F49E11.10a	scl-2	8.02732	12.9456	7.89	1.12e-05	4.34e-05	SCP-Like extracellular protein		scl-2 encodes a predicted extracellular protein that is a member of the C. elegans family of SCP/TAPS (sperm coating protein/Tpx-1/Ag5/PR-1/Sc7) domain-containing proteins; an scl-2 deletion mutation, tm2428, is reported to be homozygous viable.
(5) Other	54	WBGene00022680	ZK180.6a	ZK180.6	0.467633	12.8165	3.24	0.00856	0.0127	not known		none available
(5) Other	55	WBGene00016221	C29F9.6	C29F9.6	0.0687769	12.7193	4.71	0.00077	0.00144	not known	Zinc finger, TAZ; coactivator CBP	none available
(5) Other	56	WBGene00045188	B0284.5	B0284.5	0.0687769	12.7075	5.63	0.000197	0.000439	not known		none available
(5) Other	57	WBGene00008850	F15B9.6	F15B9.6	4.09601	12.6907	9.36	2.39e-06	1.45e-05	not known		none available
(5) Other	58	WBGene00009710	F44G3.10	F44G3.10	0.126264	12.6359	3	0.0129	0.0183	not known		F44G3.10 encodes a claudin homolog that may be required for normal cohesion of apical junctions in epithelia; F44G3.10 is worm-specific, with obvious homologs only in C. elegans; F44G3.10 has no obvious function in mass RNAi assays; claudins are integral membrane proteins with four transmembrane sequences that are found in mammalian tight junctions (TJs), induce TJs when transgenically expressed …
(5) Other	59	WBGene00008376	D1054.9a	D1054.9	0.187235	12.6313	4.64	0.000852	0.00158	not known		none available
(5) Other	60	WBGene00018062	F35F10.13	F35F10.13	0.611679	12.6242	8.06	9.38e-06	3.79e-05	not known		none available
(5) Other	61	WBGene00007660	C17H1.7	C17H1.7	2.99421	12.6049	7.09	2.88e-05	8.94e-05	not known		none available
(5) Other	62	WBGene00016281	C31B8.4	C31B8.4	0.107604	12.4145	4.47	0.00111	0.00201	not known		none available
(5) Other	64	WBGene00014046	ZK666.6	clec-60	0.43773	12.2067	2.54	0.0288	0.0382	C-type LECtin		clec-60 encodes a C-type lectin protein with no obvious non-nematode orthologs; clec-60 appears to play a role in the innate immune respone to some bacterial pathogens, including Microbacterium nematophilum and Salmonella enterica; clec-60 transcription is induced 6.6-fold by infection with M. nematophilum, making it one of the most strongly infection-responsive genes (second only to tts-1); CLEC…
(5) Other	66	WBGene00015224	B0507.7	B0507.7	0.0491649	12.1655	13.1	1e-07	2.71e-06	not known		none available
(5) Other	67	WBGene00015759	C14C6.5	C14C6.5	11.8826	12.1385	9.42	2.23e-06	1.38e-05	not known		C14C6.5 encodes a protein that contains a Metridin-like ShK toxin domain; C14C6.5 is involved in the transcriptional, innate immune response towards several different bacterial pathogens.
(5) Other	69	WBGene00000930	ZC373.6	dao-4	0.0491649	11.8566	4.85	0.000625	0.0012	Dauer or Aging adult Overexpression		dao-4 encodes a novel protein, conserved amongst nematodes; dao-4 transcripts are expressed at higher levels in wild-type adult animals than in daf-2 mutant adults at 25C, suggesting that dao-4 expression is positively regulated by DAF-2/insulin-like receptor signaling; reduced dao-4 expression in daf-2 mutants is dependent upon DAF-16.
(5) Other	70	WBGene00008010	C38D9.2	C38D9.2	1.35	11.7243	7.9	1.11e-05	4.31e-05	not known		none available
(5) Other	71	WBGene00002102	T10D4.13	ins-19	0.0956779	11.5276	3.6	0.00461	0.00723	INSulin related		ins-19 encodes an insulin-like peptide of the insulin superfamily of proteins (OMIM:176730, 147440); INS-19 is one of 38 insulin-like peptides in C. elegans, and although overexpression with INS-31 can result in low levels of larval lethality, the precise role of INS-19 in C. elegans development is not yet clear; INS-19/31 overexpression does not enhance dauer arrest in either a wild-type or daf-…
(5) Other	72	WBGene00045416	Y37H2A.14	Y37H2A.14	5.59854	11.3525	5.34	0.000298	0.000627	not known		none available
(5) Other	74	WBGene00020881	T28A11.19	T28A11.19	0.0687769	11.314	7.06	3.01e-05	9.24e-05	not known		none available
(5) Other	81	WBGene00017741	F23C8.13a	F23C8.13	0.748937	10.8673	10.7	6.84e-07	6.65e-06	not known		none available
(5) Other	83	WBGene00022887	ZK1290.5	ZK1290.5	5.24902	10.8042	12.8	1.26e-07	2.95e-06	not known	aldo/keto reductase	none available
(5) Other	84	WBGene00008698	F11D11.3	F11D11.3	0.26301	10.7634	2.33	0.0415	0.0535	not known	transmembrane glycoprotein	none available
(5) Other	85	WBGene00015225	B0507.8	B0507.8	0.218162	10.6899	5.16	0.00039	0.000794	not known		none available
(5) Other	86	WBGene00010124	F55G11.4	F55G11.4	17.422	10.6273	6.08	0.000106	0.00026	not known		F55G11.4 encodes a protein containing a CUB-like domain conserved amongst nematodes; F55G11.4 expression is increased in response to bacterial infection, suggesting that it plays a role in the defense response.
(5) Other	87	WBGene00021627	Y47D7A.15	Y47D7A.15	0.956281	10.6174	2.35	0.04	0.0517	not known		none available
(5) Other	88	WBGene00014813	M176.9	M176.9	0.0687769	10.6145	3.55	0.00507	0.00788	not known		none available
(5) Other	89	WBGene00021183	Y9C9A.16a	Y9C9A.16	0.30512	10.612	4.26	0.00157	0.00274	not known		none available
(5) Other	90	WBGene00044646	B0205.14	B0205.14	0.150527	10.513	4.75	0.000728	0.00137	not known		B0205.14 is a predicted gene that can encode a small, novel protein conserved in C. remanei and C. briggsae.
(5) Other	91	WBGene00013637	Y105C5A.13a	Y105C5A.13	0.156789	10.4549	3.76	0.00353	0.00568	not known		none available
(5) Other	92	WBGene00005685	F36G9.5	sru-22	0.0687769	10.3694	5.68	0.000184	0.000414	Serpentine Receptor, class U		none available
(5) Other	94	WBGene00017743	F23F1.2	F23F1.2	0.0962121	10.3445	8.21	7.89e-06	3.33e-05	not known		none available
(5) Other	95	WBGene00018997	F57B9.3	F57B9.3	0.298156	10.3327	6.27	8.2e-05	0.00021	not known	DNA/RNA helicase; DEAD-box	none available
(5) Other	96	WBGene00050974	Y6G8.9	Y6G8.9	0.14371	10.2483	5.02	0.000478	0.000949	not known	F-box domain	none available
(5) Other	97	WBGene00016785	C49G7.7	C49G7.7	2.12641	10.2137	7.97	1.03e-05	4.08e-05	not known	CUB-like domain	none available
(5) Other	98	WBGene00009061	F22G12.1	F22G12.1	1.35977	10.1894	6.29	8.05e-05	0.000207	not known		none available
(5) Other	99	WBGene00003096	C02A12.4	lys-7	62.7952	10.1739	7.98	1.02e-05	4.06e-05	LYSozyme		lys-7 encodes an enzyme homologous to an antimicrobial lysozyme encoded by the LYS4 gene of the protozoan parasite Entamoeba histolytica; LYS-7 functions in the innate immune response as an antimicrobial enzyme that, by homology, hydrolyzes the 1,4-beta-linkages between N-acetyl-D-glucosamine and N-acetylmuramic acid in peptidoglycan heteropolymers of prokaryotic cell walls; loss of lys-7 activit…
(5) Other	100	WBGene00020616	T20D4.10	T20D4.10	0.247882	10.0953	3.33	0.00735	0.011	not known		none available
(5) Other	102	WBGene00011668	T09F5.9	clec-47	0.533226	10.0176	2.67	0.0229	0.031	C-type LECtin		clec-47 encodes a C-type lectin; clec-47 expression is upregulated in response to stressors including ionizing radiation and bacterial infection.
(5) Other	105	WBGene00019021	F57H12.6	F57H12.6	0.134591	9.90329	8.49	5.81e-06	2.67e-05	not known		none available
(5) Other	106	WBGene00017735	F23C8.6	did-2	37.391	9.84726	21.8	6.16e-10	1.07e-06	Doa4-Independent Degradation, homologous to yeast Did2		none available
(5) Other	107	WBGene00219378	F43G6.17a	F43G6.17	0.0491649	9.77854	5.67	0.000187	0.000421	not known		none available
(5) Other	108	WBGene00008357	D1025.6	nspc-16	0.133844	9.75322	3.94	0.00263	0.00435	Nematode Specific Peptide family, group C		none available
(5) Other	109	WBGene00013007	Y48E1B.8	Y48E1B.8	5.56615	9.75057	5.63	0.000197	0.000438	not known	nucleotide-diphospho-sugar transferase	none available
(5) Other	111	WBGene00021081	W08A12.4	W08A12.4	0.206911	9.61973	3.66	0.00421	0.00666	not known		none available
(5) Other	112	WBGene00016991	CD4.5	CD4.5	0.0836647	9.56578	3.73	0.00374	0.006	not known		none available
(5) Other	113	WBGene00012231	W04A4.2	W04A4.2	4.43753	9.54395	11.8	2.67e-07	4.19e-06	not known		none available
(5) Other	114	WBGene00019730	M02D8.4a	asns-2	17.9109	9.4993	13.8	5.85e-08	2.31e-06	ASparagiNe Synthetase		none available
(5) Other	116	WBGene00008634	F10A3.4	F10A3.4	1.70057	9.43674	8.36	6.7e-06	2.95e-05	not known	CUB-like domain	none available
(5) Other	117	WBGene00007440	C08E8.4	C08E8.4	4.32539	9.3669	5.58	0.000211	0.000466	not known	aldehyde dehydrogenase	none available
(5) Other	120	WBGene00012398	Y6E2A.4	Y6E2A.4	0.926703	9.27075	7.59	1.6e-05	5.63e-05	not known		none available
(5) Other	123	WBGene00007131	B0284.1	B0284.1	0.600206	9.21544	3.93	0.00269	0.00445	not known		none available
(5) Other	126	WBGene00021473	Y39G10AR.17	sydn-1	14.557	9.18078	17.1	6.84e-09	1.52e-06	SSynaptic Defective eNhancer		none available
(5) Other	128	WBGene00005652	W07G4.6a	srr-1	0.128201	9.10664	4.59	0.000935	0.00172	Serpentine Receptor, class R		none available
(5) Other	129	WBGene00016523	C39B5.5	C39B5.5	0.589249	9.09208	3.16	0.00976	0.0143	not known		none available
(5) Other	130	WBGene00014039	ZK662.2	ZK662.2	0.0687769	9.04178	3.28	0.00799	0.0119	not known		none available
(5) Other	131	WBGene00022345	Y82E9BR.12	fbxa-138	0.112705	9.03895	3.98	0.00247	0.00411	F-box A protein		none available
(5) Other	132	WBGene00001500	C54F6.14	ftn-1	1.97392	9.01029	4.13	0.00192	0.00327	FerriTiN		ftn-1 encodes one of two C. elegans ferritin heavy chain homologs; ftn-1 activity is essential for normal lifespan under iron stress conditions and, in addition, has been reported to be essential for embryogenesis; an ftn-1::gfp reporter is expressed in the intestine at all stages of development and its expression, as well as that of ftn-1 mRNA, increases under iron stress conditions and in the b…
(5) Other	134	WBGene00003435	C33F10.9	msp-40	0.105231	8.98691	2.59	0.0262	0.0351	Major Sperm Protein		msp-40 encodes a protein that belongs to a family of proteins called the Major Sperm Proteins (MSPs) that is conserved in nematodes; this family consists of closely related, small, basic proteins that make up 15% of sperm protein; this multigene family consists of over fifty genes, including many pseudogenes; MSPs are involved in both extracellular signaling and cytoskeletal functions during repr…
(5) Other	135	WBGene00021235	Y19D10B.6	Y19D10B.6	0.420466	8.91853	5.48	0.000246	0.00053	not known		Y19D10B.6 encodes a neprilysin; neprilysins are thermolysin-like zinc metallopeptidases, found on the outer surface of animal cells, that negatively regulate small signalling peptides (e.g., enkephalin, tachykinin, insulin, and natriuretic peptides) by cleaving them; Y19D10B.6 has no clear orthologs in other organisms.
(5) Other	136	WBGene00014030	ZK637.13	glb-1	7.88321	8.86972	12	2.2e-07	3.71e-06	GLoBin related		glb-1 encodes a globin; glb-1 transcription is uninduced by anoxia, but repressed by DAF-2 signalling in a DAF-16 dependent manner; glb-1 is expressed in distal germline, late embryonic cells that are probably hypodermal precursors, and young adults; glb-1 transcription is lower in L3 larvae than in adults, while in adults it is higher than that of most other globins; glb-1 has no obvious functio…
(5) Other	139	WBGene00014006	ZK596.1	ZK596.1	3.56391	8.70044	21.4	7.34e-10	1.07e-06	not known		none available
(5) Other	140	WBGene00012216	W02D9.10	W02D9.10	7.09118	8.65087	15.5	1.9e-08	1.7e-06	not known		none available
(5) Other	141	WBGene00005654	F36D3.3	srr-3	0.0687769	8.62707	3.77	0.00349	0.00562	Serpentine Receptor, class R		none available
(5) Other	142	WBGene00008862	F15D4.5	F15D4.5	3.56062	8.61288	6	0.000118	0.000285	not known		none available
(5) Other	143	WBGene00021874	not known	clec-81	1.63836	8.59554	5.41	0.000271	0.000577	not known		none available
(5) Other	144	WBGene00019495	K07E8.3	sdz-24	3.84926	8.56071	7.52	1.74e-05	6e-05	SKN-1 Dependent Zygotic transcript		none available
(5) Other	145	WBGene00017734	F23C8.5a	F23C8.5	107.866	8.54001	17.4	5.91e-09	1.52e-06	not known		The F23C8.5 gene encodes an ortholog of the human gene ELECTRON TRANSFER FLAVOPROTEIN BETA SUBUNIT (ETFB), which when mutated leads to glutaricaciduria type IIB (OMIM:130410).
(5) Other	146	WBGene00009215	F28D1.5	thn-2	13.3158	8.45725	10.6	7.71e-07	7.06e-06	THaumatiN family		none available
(5) Other	147	WBGene00015660	C09H5.2a	catp-3	14.5194	8.44833	11.3	4.06e-07	5.19e-06	Cation transporting ATPase		none available
(5) Other	150	WBGene00009916	F52A8.3a	F52A8.3	0.0687769	8.29474	4.88	0.000595	0.00115	not known		none available
(5) Other	151	WBGene00011596	T07G12.5a	T07G12.5	0.0962121	8.20911	3.18	0.00952	0.0139	not known	permease	none available
(5) Other	152	WBGene00000951	K03B8.9	deg-3	0.172444	8.20777	4.76	0.000708	0.00134	DEGeneration of certain neurons		deg-3 encodes an alpha subunit of a nicotinic acetylcholine receptor (nAChR); originally defined by a gain-of-function mutation that results in neuronal degeneration and uncoordinated movement, DEG-3 can form heteromeric channels with a second alpha subunit, DES-2, and in vivo these channels appear to be required for chemosensation of choline; deg-3 and des-2 reside in an operon, and consistent w…
(5) Other	154	WBGene00004139	R09B5.5	pqn-54	0.179074	8.18974	3.99	0.00244	0.00408	Prion-like-(Q/N-rich)-domain-bearing protein		The protein product of this gene is predicted to contain a glutamine/asparagine (Q/N)-rich ('prion') domain, by the algorithm of Michelitsch and Weissman (as of the WS77 release of WormBase, i.e., in wormpep77).
(5) Other	155	WBGene00001725	Y65B4BR.6a	grl-16	1.19437	8.17966	2.68	0.0227	0.0308	GRound-Like (grd related)		grl-16 encodes, by alternative splicing, two hedgehog-like proteins with an N-terminal signal sequence, a central proline-rich low-complexity region, and a C-terminal Ground-like (Grl) domain; the Grl domain is predicted to form a cysteine-crosslinked protein involved in intercellular signalling, and it has subtle similarity to the N-terminal Hedge domain of HEDGEHOG proteins.
(5) Other	156	WBGene00021586	Y46C8AL.9a	clec-75	0.275802	8.17933	5.22	0.000358	0.000737	C-type LECtin		none available
(5) Other	157	WBGene00022383	Y95B8A.2	Y95B8A.2	0.433467	8.16431	6.4	6.93e-05	0.000182	not known		none available
(5) Other	158	WBGene00018601	F48C1.9	F48C1.9	0.133844	8.14154	2.72	0.0211	0.0287	not known		none available
(5) Other	160	WBGene00003539	T11F9.3	nas-20	5.00646	8.02188	10.1	1.15e-06	9.03e-06	Nematode AStacin protease		nas-20 encodes an astacin-like metalloprotease.
(5) Other	161	WBGene00206536	C14A6.16	C14A6.16	0.133844	8.0189	4.74	0.000737	0.00139	not known		none available
(5) Other	162	WBGene00005602	C03G6.3a	srj-14	0.347071	7.97424	6.23	8.71e-05	0.000221	Serpentine Receptor, class J		none available
(5) Other	163	WBGene00014132	ZK896.1	ZK896.1	0.343152	7.96065	4.82	0.00065	0.00125	not known	CUB-like domain	none available
(5) Other	165	WBGene00003958	F23B2.11	pcp-3	15.6313	7.91206	11.5	3.38e-07	4.74e-06	Prolyl Carboxy Peptidase like		none available
(5) Other	166	WBGene00004987	T08A9.12	spp-2	7.84837	7.9039	10.3	9.82e-07	8.18e-06	SaPosin-like Protein family		spp-2 encodes an antimicrobial peptide that belongs to the SPP-protein family, called caenopores, with structural similarity to saposin-like proteins (SAPLIPs), the amoebapores and the mammalian NK-lysin and granulysin; caenopores are part of the worm's innate immune system and interact with and eliminate bacteria via membrane pore-forming activity; C. elegans has at least 33 putative SPP protein…
(5) Other	167	WBGene00000399	R05H10.6	cdh-7	0.314031	7.82643	3.66	0.00419	0.00663	CaDHerin family		cdh-7 encodes a protein that contains a cadherin domain.
(5) Other	168	WBGene00017747	F23F1.6	F23F1.6	2.00598	7.82294	9.39	2.32e-06	1.41e-05	not known		none available
(5) Other	169	WBGene00017698	F22B7.9	F22B7.9	7.86798	7.82276	11.1	4.61e-07	5.52e-06	not known		F22B7.9 encodes a predicted methyltransferase; F22B7.9 reporter fusions are expressed in the intestine.
(5) Other	172	WBGene00022770	ZK563.6	acp-1	2.1495	7.76575	11.2	4.57e-07	5.5e-06	ACid Phosphatase family		none available
(5) Other	173	WBGene00021779	Y51H7C.1	Y51H7C.1	14.0627	7.75343	16.3	1.09e-08	1.53e-06	not known		none available
(5) Other	174	WBGene00007320	C05B5.2	C05B5.2	0.147208	7.69613	3.99	0.00244	0.00407	not known		none available
(5) Other	176	WBGene00001730	ZC168.5	grl-21	0.115353	7.68556	2.8	0.0183	0.0252	GRound-Like (grd related)		grl-21 encodes a hedgehog-like protein, with an N-terminal signal sequence, a central proline-rich low-complexity region, and a C-terminal Ground-like (Grl) domain; GRL-21 is expressed in arcade cells and hypodermis; the Grl domain is predicted to form a cysteine-crosslinked protein involved in intercellular signalling, and it has subtle similarity to the N-terminal Hedge domain of HEDGEHOG prote…
(5) Other	178	WBGene00010508	K02E2.7a	K02E2.7	0.0491649	7.56058	4.81	0.00066	0.00126	not known		none available
(5) Other	179	WBGene00016875	C52D10.1	C52D10.1	7.05301	7.55009	14.8	3e-08	1.95e-06	not known		none available
(5) Other	182	WBGene00018760	F53E10.4	irg-3	4.21261	7.49034	10.8	5.95e-07	6.19e-06	Infection Response Gene		none available
(5) Other	183	WBGene00016645	C44C1.6	C44C1.6	0.186375	7.47919	3.47	0.00578	0.00885	not known		none available
(5) Other	185	WBGene00045415	Y43F8B.15	Y43F8B.15	0.269315	7.47501	5.37	0.000286	0.000604	not known		none available
(5) Other	189	WBGene00021337	Y34F4.2a	Y34F4.2	1.78901	7.42665	10.1	1.19e-06	9.2e-06	not known		none available
(5) Other	191	WBGene00045401	T26F2.3	T26F2.3	0.424689	7.3982	4.32	0.00142	0.0025	not known		none available
(5) Other	193	WBGene00003778	C15H9.1	nnt-1	6.7318	7.34247	16.1	1.24e-08	1.58e-06	Nicotinamide Nucleotide Transhydrogenase		nnt-1 encodes a proton-pumping nicotinamide nucleotide transhydrogenase predicted to be mitochondrial.
(5) Other	194	WBGene00007384	C06G8.1	swt-3	6.55831	7.33868	10	1.28e-06	9.56e-06	SWEET sugar transporter family		none available
(5) Other	195	WBGene00012961	Y47H10A.5	Y47H10A.5	12.2964	7.31193	3.03	0.0122	0.0175	not known		none available
(5) Other	197	WBGene00008572	F08B12.4a	F08B12.4	19.7548	7.30284	11.9	2.48e-07	3.99e-06	not known		none available
(5) Other	198	WBGene00006893	F10E7.4	spon-1	7.62966	7.28773	14.3	4.09e-08	2.09e-06	SPONdin (extracellular matrix glycoprotein) family		spon-1 encodes a conserved member of the spondin family of ECM proteins, closely related to vertebrates spondins (OMIM: 604989, 605918); spon-1 most resemble to F-spondins which contain a N-terminal reelin domain and upto six thrombospondin type I repeats (TSRs); spon-1 mutants display defects in epidermal elongation, muscle attachment, axon guidance and development of excretory canal and of epid…
(5) Other	199	WBGene00022562	ZC204.12	ZC204.12	6.77066	7.28402	12.8	1.24e-07	2.95e-06	not known		none available
(5) Other	200	WBGene00008603	F09B9.4	F09B9.4	5.2419	7.28018	15.8	1.58e-08	1.64e-06	not known		none available
(5) Other	201	WBGene00007181	B0462.1	B0462.1	0.0805672	7.27692	4.56	0.000978	0.00179	not known		none available
(5) Other	202	WBGene00011844	T19C9.8	T19C9.8	0.979639	7.26527	4.96	0.000526	0.00103	not known		none available
(5) Other	203	WBGene00013481	Y69H2.3a	Y69H2.3	75.0973	7.25543	16.4	1.08e-08	1.53e-06	not known	protease inhibitor	none available
(5) Other	204	WBGene00013882	ZC410.5a	ZC410.5	14.3321	7.24603	15.8	1.5e-08	1.64e-06	not known		none available
(5) Other	206	WBGene00020774	T24E12.5	T24E12.5	1.27867	7.2105	10.9	5.63e-07	6.06e-06	not known		none available
(5) Other	207	WBGene00009877	F49C12.7a	F49C12.7	9.50485	7.20341	12.7	1.27e-07	2.95e-06	not known	aminoglycoside phosphotransferase	none available
(5) Other	208	WBGene00004275	W04G5.2a	rab-11.2	0.0836647	7.19645	3.27	0.00808	0.012	RAB family		none available
(5) Other	209	WBGene00021625	Y47D7A.13	Y47D7A.13	1.27935	7.16946	3.49	0.00564	0.00866	not known		none available
(5) Other	210	WBGene00018315	F41H10.2	F41H10.2	0.219332	7.16375	5.27	0.000331	0.000686	not known		none available
(5) Other	211	WBGene00006475	M03F4.3a	tyra-3	0.161367	7.14654	4.03	0.00228	0.00383	TYRAmine receptor		tyra-3 encodes a homolog of octopamine or tyramine receptors that is expressed in head neurons (anterior deirid and cephalic sensilla), tail neurons, and vulva; TYRA-3 is required for normal inhibition of movement by 5-HT, with tyra-3(RNAi) animals being hyperactive; heterologously expressed TYRA-3 has no effect on adenylate cyclase activity.
(5) Other	212	WBGene00016596	C42D4.3	C42D4.3	0.165263	7.13722	3.12	0.0106	0.0153	not known		none available
(5) Other	213	WBGene00007867	C32H11.4	C32H11.4	8.85114	7.13545	4.8	0.000673	0.00128	not known	CUB-like domain	none available
(5) Other	215	WBGene00006865	ZK563.1	slcf-2	0.643808	7.11901	5.92	0.000131	0.000311	SoLute Carrier Family		slcf-2 encodes a transmembrane permease of the major facilitator superfamily (MFS) that by homology, is predicted to transport metabolites across cellular membranes in response to chemiosmotic gradients; slcf-2 was first identified in molecular analyses of gene products linked to the vitellogenin (vit) loci on the X chromosome; slcf-2 mRNA is detected in embryos and adults, suggesting that slcf-2…
(5) Other	216	WBGene00011082	R07B1.11	R07B1.11	0.19863	7.06942	5.18	0.000381	0.000779	not known		none available
(5) Other	217	WBGene00019156	H04M03.12a	H04M03.12	0.164345	7.05914	4.06	0.00215	0.00364	not known		none available
(5) Other	218	WBGene00017938	F31A3.3	F31A3.3	0.134591	7.0336	3.96	0.00255	0.00423	not known		none available
(5) Other	219	WBGene00003554	F57C12.1	nas-38	0.133844	7.02431	4.39	0.00128	0.00228	Nematode AStacin protease		nas-38 encodes an astacin-like metalloprotease; loss of nas-38 activity via RNAi in an rrf-3 mutant background results in an extended life span.
(5) Other	220	WBGene00009835	F47H4.2a	F47H4.2	0.996413	6.97511	8.5	5.78e-06	2.66e-05	not known	F-box domain	This gene encodes a protein containing an F-box, a motif predicted to mediate protein-protein interactions either with homologs of yeast Skp-1p or with other proteins; this gene's encoded protein also contains an FTH/DUF38 motif, which may also mediate protein-protein interaction.
(5) Other	221	WBGene00044660	F44G3.13	fbxa-87	0.112705	6.94958	3.57	0.0049	0.00763	F-box A protein		none available
(5) Other	222	WBGene00017294	F09E10.1	F09E10.1	4.05661	6.93149	9.54	2e-06	1.29e-05	not known		none available
(5) Other	224	WBGene00009964	F53B6.9	fip-6	0.484644	6.92525	5.28	0.000328	0.000681	Fungus-Induced Protein		none available
(5) Other	225	WBGene00008390	D1086.3	D1086.3	21.6256	6.91481	12.3	1.83e-07	3.44e-06	not known		none available
(5) Other	226	WBGene00019105	F59D6.3	asp-8	3.99988	6.90808	20.5	1.13e-09	1.11e-06	ASpartyl Protease		none available
(5) Other	227	WBGene00018744	F53B3.6	F53B3.6	3.75839	6.87655	9.94	1.35e-06	9.89e-06	not known		none available
(5) Other	228	WBGene00010092	F55C5.2	F55C5.2	0.2355	6.87542	5.66	0.00019	0.000425	not known	glycerophosphoryl diester phosphodiesterase	none available
(5) Other	229	WBGene00020797	T25D3.3	T25D3.3	3.99546	6.85956	17.5	5.48e-09	1.52e-06	not known		none available
(5) Other	231	WBGene00018755	F53C3.12	bcmo-2	5.10737	6.848	16.9	7.71e-09	1.52e-06	Beta-Carotene 15,15'-MonoOxygenase		none available
(5) Other	232	WBGene00017612	F19G12.4	F19G12.4	0.0687769	6.84281	4.23	0.00164	0.00285	not known		none available
(5) Other	233	WBGene00019436	K06A9.2	K06A9.2	1.41213	6.83929	6.5	6.1e-05	0.000164	not known		This gene encodes a protein containing an F-box, a motif predicted to mediate protein-protein interactions either with homologs of yeast Skp-1p or with other proteins.
(5) Other	234	WBGene00044644	B0205.13	B0205.13	0.904727	6.83144	6.24	8.55e-05	0.000218	not known		B0205.13 encodes a small, novel protein conserved in C. remanei and C. briggsae.
(5) Other	235	WBGene00021043	W05G11.6a	pck-1	62.9528	6.82768	11.7	2.98e-07	4.45e-06	Phosphoenolypyruvate CarboxyKinase		pck-1 is one of three C. elegans genes that encode proteins with similarity to phosphoenolpyruvate carboxykinase (PEPCK); by similarity, the products of W05G11.6 are predicted to function in gluconeogenesis.
(5) Other	236	WBGene00022490	Y119D3B.13	Y119D3B.13	6.67131	6.8232	11.2	4.43e-07	5.42e-06	not known		none available
(5) Other	237	WBGene00012777	Y42A5A.2a	lact-8	2.04901	6.81237	11.7	2.95e-07	4.41e-06	beta-LACTamase domain containing		lact-8 encodes a beta-lactamase domain-containing protein that contains a predicted transmembrane domain in its N terminus.
(5) Other	238	WBGene00012809	Y43F8A.2	Y43F8A.2	0.134591	6.80692	3.6	0.00462	0.00724	not known		none available
(5) Other	239	WBGene00015403	C03H5.1	clec-10	1.78374	6.8006	9.65	1.8e-06	1.21e-05	C-type LECtin		none available
(5) Other	240	WBGene00015932	C17H12.6a	C17H12.6	1.8338	6.77254	3.71	0.00387	0.00618	not known	CUB-like domain	none available
(5) Other	242	WBGene00020471	T13B5.3	pho-14	24.4743	6.75044	17.1	7.01e-09	1.52e-06	intestinal acid PHOsphatase		none available
(5) Other	243	WBGene00022675	ZK180.1	gbb-2	2.04742	6.73189	9.45	2.18e-06	1.36e-05	GABA B receptor subunit		gbb-2 encodes a subunit of the GABAB receptor dimer (GBB-1/2) that is required for inhibition of cholinergic motor neurons by GABA, and thus for normally restrained movement and aldicarb resistance; gbb-2(tm1165) mutants move abnormally fast, with abnormally few changes of direction; GBB-2 is orthologous to human GABBR2 (OMIM:607340, associated with susceptibility to nicotine dependence).
(5) Other	246	WBGene00011042	R05H10.1	R05H10.1	0.158052	6.70342	3.14	0.0102	0.0149	not known		none available
(5) Other	247	WBGene00015605	C08E3.13	C08E3.13	0.133844	6.6724	2.86	0.0164	0.0229	not known		C08E3.13 encodes a novel protein; expression studies indicate that C08E3.13 expression is positively regulated by signaling through the DBL-1/TGF-beta signaling pathway; in situ hybridization experiments reveal that C08E3.13 transcripts are expressed in the intestine and the vulva.
(5) Other	248	WBGene00017732	F23C8.3a	F23C8.3	0.751224	6.6716	10.7	6.91e-07	6.69e-06	not known		none available
(5) Other	249	WBGene00008358	D1025.7	nspc-18	0.276321	6.65151	3.98	0.00246	0.0041	Nematode Specific Peptide family, group C		none available
(5) Other	250	WBGene00077629	K10G4.13	K10G4.13	0.0962121	6.65048	6.02	0.000116	0.00028	not known		none available
(5) Other	251	WBGene00004113	D1007.14	pqn-24	9.61122	6.64276	20.3	1.23e-09	1.11e-06	Prion-like-(Q/N-rich)-domain-bearing protein		The protein product of this gene is predicted to contain a glutamine/asparagine (Q/N)-rich ('prion') domain, by the algorithm of Michelitsch and Weissman (as of the WS77 release of WormBase, i.e., in wormpep77).
(5) Other	252	WBGene00011330	T01D3.6a	T01D3.6	14.6971	6.62291	6.05	0.00011	0.000269	not known	von Willebrand factor; fibrinogen; EGF-like	none available
(5) Other	253	WBGene00003879	F57H12.3	ora-1	0.0687769	6.62148	3.23	0.00867	0.0128	Onchocerca Related Antigen family		none available
(5) Other	254	WBGene00008359	D1025.8	nspc-17	0.367864	6.60081	5.56	0.000219	0.000481	Nematode Specific Peptide family, group C		none available
(5) Other	255	WBGene00014761	F46A8.11	F46A8.11	0.369339	6.59427	6.76	4.39e-05	0.000124	not known		none available
(5) Other	256	WBGene00003429	R05F9.13	msp-31	0.175032	6.59402	3.07	0.0115	0.0166	Major Sperm Protein		msp-31 encodes a member of the major sperm protein family; msp-31 has a C. briggsae homolog as predicted by the Wobble Aware Bulk Aligner (WABA); expression is enriched in sperm.
(5) Other	257	WBGene00015602	C08E3.10a	fbxa-158	0.359468	6.58446	2.48	0.0321	0.0423	F-box A protein		This gene encodes a protein containing an F-box, a motif predicted to mediate protein-protein interactions either with homologs of yeast Skp-1p or with other proteins; this gene's encoded protein also contains an FTH/DUF38 motif, which may also mediate protein-protein interaction.
(5) Other	258	WBGene00001113	F25H8.5a	dur-1	4.34653	6.5658	19.6	1.75e-09	1.24e-06	Dauer Up-Regulated		The dur-1 ('Dauer UpRegulated') gene encodes proteins (DUR-1A and DUR-1C) that are predicted to be hydrophilic and heat-resistant, and that might participate in anhydrobiosis; expression of at least one dur-1 transcript is upregulated in dauer larvae and other transcripts may be specifically expressed in dauer larvae.
(5) Other	259	WBGene00077692	C08E8.10	C08E8.10	1.58094	6.56435	5.73	0.000171	0.000388	not known		none available
(5) Other	260	WBGene00013400	Y62H9A.12	Y62H9A.12	0.235441	6.55337	4.19	0.00174	0.003	not known		none available
(5) Other	263	WBGene00012426	Y11D7A.1	Y11D7A.1	0.172726	6.53585	2.76	0.0197	0.027	not known		none available
(5) Other	264	WBGene00007414	C07E3.3a	C07E3.3	4.15875	6.53497	5.56	0.000219	0.00048	not known		none available
(5) Other	265	WBGene00194717	ZC239.22	ZC239.22	0.647999	6.532	6.34	7.47e-05	0.000195	not known		none available
(5) Other	266	WBGene00008584	F08G5.6	F08G5.6	3.88451	6.53028	3.63	0.00444	0.00699	not known		F08G5.6 encodes a CUB-like domain-containing protein; F08G5.6 is involved in the transcriptional, innate immune response towards several different bacterial pathogens; an F08G5.6::gfp promoter fusion is expressed in the intestine and in head neurons; F08G5.6 expression is positively regulated in the intestine by the ELT-2 GATA transcription factor.
(5) Other	267	WBGene00019532	K08D10.9	K08D10.9	0.0836647	6.51647	2.97	0.0136	0.0192	not known		none available
(5) Other	268	WBGene00013294	Y57G11B.1	Y57G11B.1	0.0491649	6.51284	3.46	0.00592	0.00904	not known		none available
(5) Other	270	WBGene00016877	C52D10.3	C52D10.3	5.11354	6.49466	11	5.23e-07	5.87e-06	not known		none available
(5) Other	271	WBGene00018051	F35D11.11a	dyf-14	17.5992	6.45541	14.1	4.64e-08	2.2e-06	abnormal CHEmotaxis		che-10 encodes, by alternative splicing, at least four isoforms of a rootletin ortholog required for ciliogenesis; che-10(ks69) mutants have strong but not absolute defects in cilium initiation, forming 1-2 short cilia per amphid channel and showing intraflagellar transport (IFT) along these vestigial cilia; che-10(ks69) mutants have no remaining cilia in their phasmid channels, and abnormal IFT …
(5) Other	272	WBGene00016187	C28G1.2	C28G1.2	0.150527	6.44044	3.19	0.00938	0.0137	not known	serine protease inhibitor	none available
(5) Other	273	WBGene00008492	F01D5.1	F01D5.1	6.95049	6.43987	7.12	2.79e-05	8.71e-05	not known	ShK domain	none available
(5) Other	274	WBGene00021263	Y22D7AR.10	Y22D7AR.10	15.726	6.43466	7.31	2.23e-05	7.32e-05	not known		none available
(5) Other	275	WBGene00010928	M162.2	clec-258	0.659301	6.43454	3.68	0.00407	0.00647	C-type LECtin		none available
(5) Other	278	WBGene00008632	F10A3.2	fbxa-88	0.19708	6.42704	3.52	0.00528	0.00817	F-box A protein		This gene encodes a protein containing an F-box, a motif predicted to mediate protein-protein interactions either with homologs of yeast Skp-1p or with other proteins; this gene's encoded protein also contains an FTH/DUF38 motif, which may also mediate protein-protein interaction.
(5) Other	279	WBGene00022848	ZK1055.7	ZK1055.7	12.1966	6.4221	13.6	6.74e-08	2.41e-06	not known		none available
(5) Other	280	WBGene00018307	F41G4.1	dyla-1	0.13839	6.41596	3.55	0.00504	0.00784	DYnein Light chain, Axonemal p28 type		none available
(5) Other	281	WBGene00009514	F37H8.5	F37H8.5	35.0285	6.41337	10.3	9.6e-07	8.07e-06	not known	thiol reductase	none available
(5) Other	282	WBGene00015223	B0507.6	B0507.6	0.411107	6.41197	4.48	0.00111	0.002	not known		none available
(5) Other	283	WBGene00022847	ZK1055.6a	ZK1055.6	4.65425	6.40894	14.5	3.46e-08	1.98e-06	not known		none available
(5) Other	285	WBGene00015935	C17H12.10	C17H12.10	0.118138	6.39779	5.01	0.000489	0.000968	not known		none available
(5) Other	286	WBGene00003124	K10B3.9	mai-1	6.09284	6.39526	14.6	3.4e-08	1.98e-06	Mitochondrial ATPase Inhibitor family		mai-1 is homologous to mitochondrial intrinsic ATPase inhibitor protein (IF(1)), which blocks reverse action (ATP hydrolysis) by F(0)F(1)-ATPase when its (normally required) proton gradient is lost; MAI-1 lacks an obvious mitochondrial import signal at its N-terminus, and is not transported to yeast mitochondria; MAI-1 may be cytosolic in vivo, regulating cytosolic ATPase(s); MAI-1 can inhibit ye…
(5) Other	287	WBGene00009645	F42G10.1	F42G10.1	5.41913	6.38674	9.47	2.13e-06	1.34e-05	not known		F42G10.1 encodes a neprilysin; neprilysins are thermolysin-like zinc metallopeptidases, found on the outer surface of animal cells, that negatively regulate small signalling peptides (e.g., enkephalin, tachykinin, insulin, and natriuretic peptides) by cleaving them; F42G10.1 has no clear orthologs in other organisms.
(5) Other	289	WBGene00015433	C04E12.2	C04E12.2	1.83519	6.37749	7.13	2.75e-05	8.6e-05	not known		none available
(5) Other	290	WBGene00016052	C24B9.9	dod-3	6.03733	6.37358	4.7	0.00078	0.00146	Downstream Of DAF-16 (regulated by DAF-16)		none available
(5) Other	291	WBGene00018310	F41G4.7	F41G4.7	0.275802	6.36859	5.57	0.000214	0.00047	not known		none available
(5) Other	292	WBGene00018521	F46H5.5	F46H5.5	0.101501	6.35617	3.18	0.00944	0.0138	not known		none available
(5) Other	293	WBGene00013169	Y53F4B.23	Y53F4B.23	0.847866	6.35588	3.34	0.00722	0.0108	not known		none available
(5) Other	294	WBGene00000781	C52E4.1	cpr-1	31.0949	6.33795	4.09	0.00205	0.00348	Cysteine PRotease related		cpr-1 encodes a cysteine protease of the cathepsin B-like cysteine protease family; cpr-1 appears to be required for embryogenesis; cpr-1 is specifically expressed in the gut of all stages except the embryo and around developing embryos in the gonad; expression of cpr-1 is regulated by three promoter GATA motifs.
(5) Other	295	WBGene00019564	K09D9.1	K09D9.1	2.99074	6.33495	9.5	2.07e-06	1.31e-05	not known		none available
(5) Other	296	WBGene00007452	C08F11.3	C08F11.3	0.453927	6.30985	6.06	0.000109	0.000268	not known		none available
(5) Other	299	WBGene00019932	R07C12.2	R07C12.2	4.34828	6.29529	5.84	0.000147	0.000341	not known		none available
(5) Other	300	WBGene00006650	F09E10.11a	tts-1	30.5478	6.29191	5.77	0.000162	0.000372	Transcribed Telomerase-like Sequence		none available
(5) Other	301	WBGene00014136	ZK896.5	ZK896.5	2.08972	6.28453	7.82	1.22e-05	4.58e-05	not known	CUB-like domain	none available
(5) Other	302	WBGene00009430	F35E12.6	F35E12.6	17.1378	6.28034	9.08	3.14e-06	1.76e-05	not known	CUB-like domain	none available
(5) Other	303	WBGene00007584	C14C10.1	C14C10.1	0.13839	6.2769	2.95	0.0141	0.0199	not known	mitochondrial substrate/solute carrier	none available
(5) Other	304	WBGene00009803	F47B8.2	F47B8.2	2.33714	6.26472	8.69	4.72e-06	2.31e-05	not known		none available
(5) Other	305	WBGene00019744	M02H5.8	M02H5.8	7.58504	6.26321	10.2	1.04e-06	8.51e-06	not known		none available
(5) Other	306	WBGene00020847	T27A10.7	cgr-1	5.39829	6.25659	13.6	6.53e-08	2.38e-06	CRAL/TRIO and GOLD domain suppressor of activated Ras		none available
(5) Other	307	WBGene00009592	F40F12.3	F40F12.3	0.191793	6.24554	4.33	0.00139	0.00246	not known		none available
(5) Other	308	WBGene00004026	T20B3.7	phy-3	1.36794	6.23771	8.04	9.51e-06	3.83e-05	Proline HYdroxylase		phy-3 encodes a catalytic alpha subunit of collagen prolyl 4-hydroxylase (P4H) orthologous to human P4H alpha (III) isoform (OMIM: 608987). phy-3 belongs to a family of genes coding for catalytic subunits of the collagen modifying enzyme prolyl 4-hydroxylase; PHY-3 is involved in the synthesis of collagens in early embryos; PHY-3 have no obvious phenotypic abnormalities, but the 4-hydroxyproline …
(5) Other	309	WBGene00008577	F08G2.5	F08G2.5	2.81021	6.22024	8.13	8.64e-06	3.56e-05	not known		none available
(5) Other	310	WBGene00017250	F08D12.7	F08D12.7	3.32956	6.21875	14	4.95e-08	2.28e-06	not known		F08D12.7 encodes a novel protein conserved amongst Caenorhaditis species; although loss of F08D12.7 activity via RNAi results in no obvious defects, F08D12.7 transcripts are enriched in L1-stage muscle and upregulated in L2 larvae in response to overexpression of hlh-2 and hlh-8; in addition, in analyses of the early embryonic transcriptome, F08D12.7 transcripts are classified as strictly materna…
(5) Other	314	WBGene00018174	F38B6.4	F38B6.4	10.485	6.20143	18.9	2.56e-09	1.29e-06	not known	phosphoribosylglycinamide synthetase	none available
(5) Other	315	WBGene00020617	T20D4.11	T20D4.11	0.943935	6.19208	4.91	0.00057	0.00111	not known		none available
(5) Other	317	WBGene00010135	F55H12.4	F55H12.4	29.0906	6.17823	9.4	2.29e-06	1.4e-05	not known		none available
(5) Other	319	WBGene00195165	F57G4.11	F57G4.11	0.25856	6.17516	3.09	0.0111	0.016	not known		none available
(5) Other	320	WBGene00011573	T07C12.9	anmt-3	13.2489	6.16401	17.3	6.18e-09	1.52e-06	Amine N-MethylTransferase		none available
(5) Other	321	WBGene00020358	T08E11.2	math-39	0.571794	6.16016	6.6	5.36e-05	0.000147	MATH (meprin-associated Traf homology) domain containing		none available
(5) Other	322	WBGene00015921	C17H11.1	C17H11.1	0.128201	6.11868	3.19	0.00936	0.0137	not known	G-protein-coupled receptor	none available
(5) Other	323	WBGene00011894	T21C9.8	ttr-23	1.86761	6.10767	8.28	7.31e-06	3.14e-05	TransThyretin-Related family domain		none available
(5) Other	324	WBGene00011474	T05D4.1	aldo-1	35.5985	6.10741	11.6	3.26e-07	4.65e-06	ALDOlase (fructose bisphosphate aldolase)		aldo-1 is orthologous to the human gene ALDOLASE A, FRUCTOSE-BISPHOSPHATE (ALDOA; OMIM:103850), which when mutated leads to aldolase A deficiency.
(5) Other	328	WBGene00013009	Y48E1B.11	fbxc-23	0.357519	6.07642	3.75	0.00362	0.00581	F-box C protein		none available
(5) Other	329	WBGene00014134	ZK896.3	ZK896.3	0.241232	6.0661	4.22	0.00166	0.00288	not known		none available
(5) Other	331	WBGene00012901	Y46G5A.10	cnp-2	2.21681	6.06217	11	5.33e-07	5.94e-06	CalciNeurin binding Protein		none available
(5) Other	334	WBGene00018031	F35B3.4	F35B3.4	0.133844	6.04264	2.41	0.0363	0.0473	not known		none available
(5) Other	335	WBGene00013073	Y51A2D.4	hmit-1.1	9.43682	6.0418	5.29	0.000324	0.000674	H(+) MyoInositol coTransporter		hmit-1.1 encodes one of three C. elegans proton (H+)-dependent myo-inositol transporters; loss of hmit-1.1 activity via large-scale RNAi result in no obvious abnormalities but by homology, HMIT-1.1 is predicted to function as a plasma membrane protein required for the regulated uptake of myo-inositol and thus potentially for regulation of cell signaling and intracellular osmolarity.
(5) Other	336	WBGene00044206	T26H5.9a	T26H5.9	5.097	6.03795	5.34	0.000301	0.000633	not known		none available
(5) Other	337	WBGene00015756	C14C6.2	C14C6.2	4.50013	6.02939	9.47	2.14e-06	1.34e-05	not known	ShK domain	none available
(5) Other	338	WBGene00018465	F45E1.4	F45E1.4	7.22828	6.02013	19.5	1.87e-09	1.24e-06	not known		none available
(5) Other	339	WBGene00012880	Y45F10C.4	Y45F10C.4	8.2529	6.01997	8.78	4.31e-06	2.18e-05	not known		none available
(5) Other	340	WBGene00022572	ZC239.14	ZC239.14	0.975298	6.01493	5.83	0.00015	0.000348	not known		none available
(5) Other	341	WBGene00020223	T05A7.6	T05A7.6	0.2211	6.00551	3.08	0.0114	0.0164	not known	kinase	none available
(5) Other	342	WBGene00006672	C24A3.6	twk-18	5.00841	6.00526	19.3	2.06e-09	1.24e-06	TWiK family of potassium channels		twk-18 encodes one of 44 C. elegans TWK (two-P domain K+) potassium channel subunits that contain two pore-forming domains and four transmembrane domains; TWK-18 was originally defined by gain-of-function mutations that result in embryonic lethality at the two-fold stage, locomotion defects, longer than normal body length, abnormal egg-laying, and temperature-sensitive paralysis; as loss of TWK-1…
(5) Other	343	WBGene00017970	F32A5.4a	F32A5.4	10.3736	6.00035	15	2.53e-08	1.84e-06	not known		none available
(5) Other	344	WBGene00008944	F19B2.5	F19B2.5	19.4658	5.99787	8.63	5.04e-06	2.42e-05	not known		none available
(5) Other	345	WBGene00022653	ZK105.1	ZK105.1	17.4395	5.99292	9.17	2.89e-06	1.67e-05	not known		none available
(5) Other	347	WBGene00023490	F36A2.14	F36A2.14	0.163725	5.98925	3.88	0.00292	0.0048	not known		none available
(5) Other	349	WBGene00022474	Y119C1B.9	zig-9	7.25301	5.98366	16.6	9.39e-09	1.52e-06	2 (Zwei) IG domain protein		none available
(5) Other	351	WBGene00012325	W07A12.8	W07A12.8	0.191793	5.97372	6.52	5.9e-05	0.000159	not known		none available
(5) Other	352	WBGene00194695	B0462.5	B0462.5	1.62997	5.97111	7	3.23e-05	9.77e-05	not known		none available
(5) Other	353	WBGene00013181	Y53H1B.2	Y53H1B.2	19.7752	5.96588	12.4	1.62e-07	3.29e-06	not known		none available
(5) Other	354	WBGene00011397	T03E6.8	T03E6.8	1.09102	5.96445	8.67	4.83e-06	2.35e-05	not known		none available
(5) Other	355	WBGene00016450	C35D10.14	clec-5	4.91784	5.95504	7.7	1.41e-05	5.11e-05	C-type LECtin		none available
(5) Other	357	WBGene00012134	T28F3.8	T28F3.8	8.56399	5.93963	10.9	5.73e-07	6.11e-06	not known		none available
(5) Other	358	WBGene00008040	C40H1.5	ttr-5	7.26029	5.92983	11.1	4.94e-07	5.77e-06	TransThyretin-Related family domain		C40H1.5 encodes a protein containing a predicted signal sequence followed by a transthyretin-like domain; the product of C40H1.5 belongs to a family of apparently nematode-specific proteins whose function is not yet known.
(5) Other	361	WBGene00086568	Y2H9A.6a	Y2H9A.6	0.155953	5.91796	3.21	0.00906	0.0133	not known		none available
(5) Other	363	WBGene00018055	F35F10.5	F35F10.5	1.60351	5.9075	5.76	0.000164	0.000375	not known		none available
(5) Other	365	WBGene00009626	F42A8.1	F42A8.1	19.757	5.89528	8.98	3.48e-06	1.9e-05	not known		none available
(5) Other	367	WBGene00018024	F35A5.1	F35A5.1	19.3193	5.88873	10.8	6.31e-07	6.41e-06	not known		The F35A5.1 gene encodes a homolog of human FMR2, which when mutated leads to fragile site mental retardation, type 2 (OMIM:309548).
(5) Other	368	WBGene00022858	ZK1193.2	ZK1193.2	13.9654	5.8869	13.3	8.29e-08	2.54e-06	not known		none available
(5) Other	369	WBGene00017214	F07E5.9	F07E5.9	0.107604	5.88544	2.74	0.0204	0.0279	not known		none available
(5) Other	370	WBGene00002118	K02E2.4	ins-35	0.133844	5.87671	2.51	0.0305	0.0403	INSulin related		ins-35 encodes one of several insulin-related peptides.
(5) Other	372	WBGene00021879	Y54G2A.14	clec-83	18.2991	5.87447	14.4	3.85e-08	2.09e-06	C-type LECtin		none available
(5) Other	373	WBGene00009957	F53B2.8	F53B2.8	23.1462	5.87405	7.77	1.3e-05	4.81e-05	not known		none available
(5) Other	374	WBGene00008446	E01G4.3a	E01G4.3	16.3179	5.86144	11.1	4.63e-07	5.53e-06	not known		none available
(5) Other	375	WBGene00005642	C05E4.3	srp-1	5.83824	5.85759	14.9	2.81e-08	1.92e-06	SeRPin		srp-1 encodes an ovalbumin-like serpin (ov-serpin) member of the serine protease inhibitor superfamily; by homology, SRP-1 is predicted to function as a suicide substrate that inhibits the proteolytic activity of serine proteases.
(5) Other	376	WBGene00016330	C32E12.4	C32E12.4	6.82696	5.8528	12.7	1.32e-07	2.98e-06	not known		none available
(5) Other	377	WBGene00020595	T20B5.2	T20B5.2	0.2355	5.83215	10	1.25e-06	9.41e-06	not known		none available
(5) Other	378	WBGene00011869	T20G5.7	dod-6	9.08402	5.82755	17.2	6.65e-09	1.52e-06	Downstream Of DAF-16 (regulated by DAF-16)		none available
(5) Other	379	WBGene00000402	C45G7.5	cdh-10	0.958112	5.82291	9.11	3.06e-06	1.73e-05	CaDHerin family		cdh-10 encodes a member of the cadherin superfamily.
(5) Other	380	WBGene00006861	C24H10.5	cal-5	17.7166	5.82291	18.6	3e-09	1.33e-06	CALmodulin related genes		uvt-2 encodes a protein that contains four EF-hand calcium binding motifs with similarity to human calmodulin; mRNA weakly expressed in L1 through L4 larval stages and in the adult hermaphrodite.
(5) Other	382	WBGene00021895	Y54G2A.33	clec-84	10.2525	5.79613	12.3	1.82e-07	3.44e-06	C-type LECtin		none available
(5) Other	383	WBGene00003524	T23H4.3	nas-5	0.971296	5.79204	6.23	8.66e-05	0.00022	Nematode AStacin protease		nas-5 encodes an astacin-like metalloprotease; loss of nas-5 activity in an RNAi hypersensitive strain results in axon guidance defects, including a failure of DD/VD motoneuron commissures to reach the dorsal cord, defasciculation of the dorsal nerve cord, and midline crossing defects in the ventral nerve cord.
(5) Other	385	WBGene00013700	Y106G6D.3	Y106G6D.3	0.174348	5.78661	3.01	0.0128	0.0183	not known		none available
(5) Other	388	WBGene00003943	K09C8.1	pbo-4	7.57171	5.76349	15.1	2.32e-08	1.8e-06	PBOc defective (defecation)		pbo-4 encodes a Na+/H+ ion exchanger (NHE) most closely related to mammalian NHE1 that promotes extracellular acidification (and intracellular alkalinization) by catalyzing the electroneutral exchange of one extracellular Na+ ion for one intracellular H+ ion; in C. elegans, PBO-4 functions cell autonomously in the intestine to regulate normal posterior body wall muscle contractions (pBoc) during …
(5) Other	389	WBGene00007067	4R79.2a	4R79.2	0.241626	5.7627	4.09	0.00208	0.00352	not known	nucleo/cytoplastmic transporter	none available
(5) Other	390	WBGene00011736	T12D8.9a	T12D8.9	18.1206	5.75933	14.7	3.02e-08	1.95e-06	not known		none available
(5) Other	391	WBGene00044073	C34H4.3a	tag-244	3.42669	5.75021	6.23	8.67e-05	0.00022	Temporarily Assigned Gene name		none available
(5) Other	392	WBGene00021645	Y47G6A.19a	Y47G6A.19	7.50549	5.74837	10.4	8.61e-07	7.55e-06	not known		Y47G6A.19 encodes, by alternative splicing, two isoforms of a putative metallocarboxypeptidase orthologous to human carboxypeptidase A and B precursors (CPA1-6 and CPB1-2); the larger Y47G6A.19 isoform contains a C-terminal metridin-like ShK toxin domain absent from the smaller one; Y47G6A.19 and its human orthologs, along with other proteins, comprise an M14A peptidase family; Y47G6A.19 is downr…
(5) Other	393	WBGene00009431	F35E12.7a	dct-17	14.3316	5.74717	2.84	0.017	0.0237	DAF-16/FOXO Controlled, germline Tumor affecting		none available
(5) Other	394	WBGene00015227	B0507.10	B0507.10	0.463447	5.74618	4.49	0.00109	0.00197	not known		none available
(5) Other	396	WBGene00020869	T28A11.2a	T28A11.2	8.37279	5.74123	11.6	3.01e-07	4.46e-06	not known		none available
(5) Other	397	WBGene00020981	W03D2.6	W03D2.6	3.44032	5.74021	13.1	9.35e-08	2.67e-06	not known		none available
(5) Other	398	WBGene00020201	T04A6.2	T04A6.2	0.133844	5.7393	3.06	0.0116	0.0167	not known		none available
(5) Other	399	WBGene00006464	T07H3.1	bath-47	2.4586	5.72918	4.83	0.000645	0.00124	BTB and MATH domain containing		none available
(5) Other	400	WBGene00002050	F38B2.1a	ifa-1	14.2513	5.72742	19.5	1.92e-09	1.24e-06	Intermediate Filament, A		IFA-1 encodes an essential intermediate filament protein that is coexpressed with the essential IF protein IFB-1; IFA-1 is required for survival past the L1 larva stage, and a normal intestine; IFA-1 forms heteropolymeric intermediate filaments in vitro with an equimolar mixture of IFB-1; IFA-1 is predicted to function as a structural component of the cytoskeleton, and is required for larval deve…
(5) Other	401	WBGene00008647	F10C2.7	F10C2.7	0.0962121	5.7133	3.8	0.00332	0.00538	not known		none available
(5) Other	403	WBGene00020672	T22B7.3	T22B7.3	4.92596	5.70446	6.9	3.66e-05	0.000108	not known		none available
(5) Other	406	WBGene00006784	T21C12.1b	unc-49	4.00481	5.68686	13.1	9.9e-08	2.7e-06	UNCoordinated		unc-49 encodes multiple subunits of a heteromeric GABA receptor; unc-49 activity is required for postsynaptic GABA responsiveness and thus for normal regulation of locomotion; UNC-49::GFP reporter fusions for at least two isoforms are expressed in dorsal and ventral head and body wall muscles, with isoform-specific expression also seen in the sphincter muscle; UNC-49::GFP subcellular localization…
(5) Other	407	WBGene00011307	R186.6	mpst-7	2.84508	5.68539	11.2	4.53e-07	5.47e-06	MercaptoPyruvate SulfurTransferase homolog		none available
(5) Other	408	WBGene00016521	C39B5.3	fbxa-62	0.112705	5.6807	4.61	0.000896	0.00165	F-box A protein		none available
(5) Other	409	WBGene00002266	ZK892.1a	lec-3	9.23484	5.67411	19.9	1.56e-09	1.24e-06	gaLECtin		none available
(5) Other	410	WBGene00004249	Y39A3CL.6	pvf-1	3.55937	5.67317	14.2	4.44e-08	2.17e-06	PDGF/VEGF growth factor related		pvf-1 encodes a protein related to the VEGF family of growth factors; in C. elegans, PVF-1 functions in the male tail to regulate the position of the ray 1 sensillum via inhibition of UNC-40/DCC netrin signaling through the CED-10 GTPase; PVF-1 can bind the human VEGF receptors VEGFR1 (FLT) and VEGFR2 (KDR) and when expressed in chick embryos and human umbilical vein endothelial cells induces ang…
(5) Other	411	WBGene00017247	F08D12.3	F08D12.3	4.27802	5.66741	12.3	1.81e-07	3.43e-06	not known		none available
(5) Other	412	WBGene00020640	T20H9.4	fbxa-73	0.150527	5.65894	3.47	0.00576	0.00882	F-box A protein		none available
(5) Other	413	WBGene00009397	F35C5.9	clec-66	7.28216	5.65878	13.6	6.74e-08	2.41e-06	C-type LECtin		none available
(5) Other	414	WBGene00189956	Y34F4.6a	Y34F4.6	0.961271	5.65807	5.46	0.000253	0.000544	not known		none available
(5) Other	415	WBGene00012404	Y6G8.2a	Y6G8.2	4.38024	5.65669	10.1	1.17e-06	9.12e-06	not known		none available
(5) Other	416	WBGene00011190	R10D12.9	swt-6	12.8365	5.65297	6.77	4.31e-05	0.000123	SWEET sugar transporter family		none available
(5) Other	417	WBGene00017780	F25E2.2a	F25E2.2	26.1931	5.64184	12.3	1.73e-07	3.39e-06	not known		none available
(5) Other	418	WBGene00015599	C08E3.7	fbxa-164	0.120856	5.63455	2.23	0.0489	0.0621	F-box A protein		This gene encodes a protein containing an F-box, a motif predicted to mediate protein-protein interactions either with homologs of yeast Skp-1p or with other proteins; this gene's encoded protein also contains an FTH/DUF38 motif, which may also mediate protein-protein interaction.
(5) Other	421	WBGene00019435	K06A9.1a	K06A9.1	6.28239	5.62853	5.96	0.000126	0.0003	not known		The K06A9.1 gene encodes an homolog of human TCOF1, which when mutated leads to Treacher-Collins syndrome (OMIM:154500).
(5) Other	422	WBGene00019931	R07C12.1	R07C12.1	0.0916444	5.62634	3.07	0.0115	0.0166	not known		none available
(5) Other	423	WBGene00011262	R13H4.3	pho-8	1.09738	5.62607	5.5	0.000239	0.000518	intestinal acid PHOsphatase		none available
(5) Other	424	WBGene00045239	Y49E10.29	Y49E10.29	4.46207	5.61976	10.5	8.11e-07	7.26e-06	not known		none available
(5) Other	425	WBGene00016474	C36C5.5	C36C5.5	2.04411	5.61789	6.91	3.63e-05	0.000107	not known		none available
(5) Other	426	WBGene00022801	ZK688.6a	pcp-5	15.1684	5.61633	15.2	2.19e-08	1.77e-06	Prolyl Carboxy Peptidase like		none available
(5) Other	427	WBGene00012822	Y43F8B.12	Y43F8B.12	0.19863	5.60942	4.17	0.00181	0.0031	not known		none available
(5) Other	428	WBGene00009888	F49E2.5a	F49E2.5	66.0985	5.60617	9.65	1.79e-06	1.2e-05	not known	ribosome biogenesis	none available
(5) Other	429	WBGene00017128	E04F6.9	E04F6.9	9.4397	5.59532	14.4	3.85e-08	2.09e-06	not known		none available
(5) Other	430	WBGene00017089	E01A2.7	poml-2	1.84348	5.58701	7.41	1.97e-05	6.65e-05	PON (paraoxonase) and MEC-6 Like		The E01A2.7 gene encodes one of five paraoxonase-like proteins; it is homologous to the human genes PARAOXONASE 1 gene (PON1, OMIM:168820) and PARAOXONASE 2 (OMIM:602447), which in some allelic forms are associated with susceptibility to coronary artery disease or to variations in fasting plasma glucose.
(5) Other	432	WBGene00020836	T27A1.4	lgc-34	4.1666	5.585	19.2	2.19e-09	1.26e-06	Ligand-Gated ion Channel		none available
(5) Other	433	WBGene00002348	R06C7.10	myo-1	15.9276	5.58268	15	2.6e-08	1.85e-06	MYOsin heavy chain structural genes		none available
(5) Other	434	WBGene00001699	F09D12.1	grd-10	4.54669	5.58011	7.52	1.74e-05	6e-05	GRounDhog (hedgehog-like family)		grd-10 encodes a hedgehog-like protein, with an N-terminal signal sequence and a C-terminal Ground domain; GRD-10 is expressed in seam cells; the Ground domain is predicted to form a cysteine-crosslinked protein involved in intercellular signalling, and it has subtle similarity to the N-terminal Hedge domain of HEDGEHOG proteins; GRD-10 is weakly required for normal molting; GRD-10 is also requir…
(5) Other	435	WBGene00000085	T14B1.2	aex-2	0.163725	5.57756	5.25	0.000342	0.000707	ABoc, EXpulsion (defecation) defective		aex-2 encodes a G-protein-coupled receptor; aex-2 functions in the nervous system to activate a G(s) alpha (gsa-1) signaling pathway that regulates defecation in the hermaphrodite digestive tract; in regulating the defecation cycles, AEX-2 likely serves as the receptor for the NLP-40 neuropeptide secreted by the intestine; an AEX-2::GFP reporter fusion is expressed in the nerve ring, ventral nerv…
(5) Other	436	WBGene00022859	ZK1193.3	ZK1193.3	4.16469	5.57696	7.14	2.71e-05	8.52e-05	not known		none available
(5) Other	438	WBGene00019803	PDB1.1a	PDB1.1	8.31471	5.54877	8.29	7.21e-06	3.11e-05	not known		none available
(5) Other	439	WBGene00013331	Y57G11C.42a	Y57G11C.42	0.658684	5.5285	4.33	0.00139	0.00245	not known		none available
(5) Other	440	WBGene00018576	F47G3.1	F47G3.1	2.07007	5.52363	8.84	4.03e-06	2.08e-05	not known		none available
(5) Other	441	WBGene00006533	T28D6.2	tba-7	8.64347	5.51872	7.04	3.07e-05	9.39e-05	TuBulin, Alpha		none available
(5) Other	442	WBGene00007197	B0513.5a	B0513.5	9.35392	5.51682	14.3	4.1e-08	2.09e-06	not known		none available
(5) Other	443	WBGene00019211	H18N23.2a	H18N23.2	12.236	5.51219	14.2	4.38e-08	2.17e-06	not known		none available
(5) Other	444	WBGene00016918	C54E4.2a	C54E4.2	20.323	5.51018	8.85	3.98e-06	2.07e-05	not known		none available
(5) Other	445	WBGene00018877	F55D10.1	aman-1	9.331	5.50313	12.7	1.31e-07	2.98e-06	Alpha MANnosidase		aman-1 encodes an ortholog of human lysosomal mannosidase (MAN2B1; OMIM:609458, mutated in alpha-mannosidosis); AMAN-1 is predicted to help digest glycoproteins by removing mannose residues from their N-linked oligosaccharides; AMAN-1 has seven predicted N-glycosylation sites; AMAN-1 is biochemically active in vitro, has optimal activity at pH 4-4.5, and is unaffected by Co(II); however, AMAN-1 e…
(5) Other	446	WBGene00016558	C41A3.1	C41A3.1	11.0712	5.50234	11.8	2.6e-07	4.1e-06	not known		none available
(5) Other	448	WBGene00021336	Y34F4.1a	Y34F4.1	1.96393	5.49702	6.44	6.59e-05	0.000175	not known		none available
(5) Other	449	WBGene00016407	C34D10.2a	C34D10.2	16.93	5.49553	10.2	1.07e-06	8.65e-06	not known		none available
(5) Other	451	WBGene00013969	ZK337.1a	tep-1	22.073	5.48908	11.9	2.44e-07	3.95e-06	TEP (ThiolEster contaiTEP (ThiolEster containing Protein)		none available
(5) Other	452	WBGene00016898	C53C9.2	C53C9.2	8.57522	5.47919	10.9	5.63e-07	6.06e-06	not known		none available
(5) Other	453	WBGene00013633	Y105C5A.8a	Y105C5A.8	8.98095	5.47721	13.8	5.83e-08	2.31e-06	not known		none available
(5) Other	454	WBGene00009637	F42F12.6	nspc-13	1.03322	5.4758	7.93	1.08e-05	4.21e-05	Nematode Specific Peptide family, group C		none available
(5) Other	455	WBGene00000281	K05G3.3	cah-3	13.2905	5.47266	13.7	6.13e-08	2.36e-06	Carbonic AnHydrase		cah-3 encodes a putative carbonic anhydrase, closely similar to its paralog CAH-5; cah-3 is expressed in intestine and head (including neurons) of L3 larvae through adults, and its transcription is moderately stimulated by DBL-1 and SMA-2; CAH-3 is bound by CKU-80 in two-hybrid assays, but has no obvious function in mass RNAi assays.
(5) Other	456	WBGene00003514	T18D3.4	myo-2	20.9886	5.47196	10.1	1.16e-06	9.06e-06	MYOsin heavy chain structural genes		myo-2 encodes a muscle-type specific myosin heavy chain isoform; myo-2 is expressed in pharyngeal muscle.
(5) Other	457	WBGene00022196	Y71H2B.7	gpa-17	3.38878	5.46627	12.4	1.63e-07	3.29e-06	G Protein, Alpha subunit		gpa-17 encodes a divergent Gq alpha subunit paralogous to EGL-30; gpa-17 is reported to be expressed in intestine, but has no known function in vivo.
(5) Other	460	WBGene00019647	K11D12.7	K11D12.7	10.6529	5.45324	11.9	2.49e-07	4.01e-06	not known		none available
(5) Other	461	WBGene00006965	F54F7.4	xtr-1	0.466739	5.45232	5.19	0.000375	0.000768	MX region of TRA-2 Related		xtr-1 encodes a protein with similarity to TRA-2A and TRA-2B in a region known as the MX region, hypothesized to be a protein-protein interaction domain involved in negatively regulating tra-2 activity in the germ line.
(5) Other	462	WBGene00015236	B0511.11	B0511.11	3.49685	5.44224	11.7	2.99e-07	4.45e-06	not known		none available
(5) Other	464	WBGene00006067	F41G4.3a	sto-5	0.914116	5.44078	5.05	0.000461	0.000919	STOmatin		none available
(5) Other	465	WBGene00013013	Y48E1B.16	clec-145	1.79593	5.43223	7.26	2.36e-05	7.62e-05	C-type LECtin		none available
(5) Other	466	WBGene00017483	F15E6.2a	lgc-22	7.60837	5.42437	12.5	1.55e-07	3.26e-06	Ligand-Gated ion Channel		none available
(5) Other	467	WBGene00000002	F27C8.1	aat-1	4.3845	5.42376	14.4	3.89e-08	2.09e-06	Amino Acid Transporter		aat-1 encodes an amino acid transporter catalytic subunit; when co-expressed in Xenopus oocytes with the ATG-2 glycoprotein subunit, AAT-1 is able to facilitate amino acid uptake and exchange, showing a relatively high affinity for small and some large neutral amino acids; in addition, AAT-1 is able to covalently associate with ATG-2 or ATG-1 to form heterodimers in the Xenopus expression system;…
(5) Other	468	WBGene00013439	Y66D12A.13	Y66D12A.13	6.39028	5.41913	17.9	4.37e-09	1.41e-06	not known		none available
(5) Other	470	WBGene00002274	F38A5.3a	lec-11	5.46505	5.41302	8.2	8.03e-06	3.37e-05	gaLECtin		lec-11 encodes a predicted member of the galectin family that shares highest similarity with lec-7 through lec-10 within the C-terminal tail and also shares a higher relative histidine content in common with lec-7 through lec-10; can bind sugar in vitro.
(5) Other	471	WBGene00009982	F53F1.4	F53F1.4	9.7943	5.41051	4.73	0.000746	0.0014	not known		none available
(5) Other	472	WBGene00015196	B0454.5	B0454.5	5.0305	5.41005	12.3	1.83e-07	3.44e-06	not known		none available
(5) Other	473	WBGene00018340	F42A10.3	anmt-2	8.77207	5.40611	10.2	1.03e-06	8.46e-06	Amine N-MethylTransferase		none available
(5) Other	475	WBGene00012070	T26H5.8	T26H5.8	0.163725	5.40095	3.36	0.00696	0.0105	not known		none available
(5) Other	476	WBGene00001702	W05E7.3	grd-13	4.47603	5.39817	6.9	3.64e-05	0.000107	GRounDhog (hedgehog-like family)		grd-13 encodes a hedgehog-like protein, with an N-terminal signal sequence and a C-terminal Ground domain; GRD-13 is expressed in posterior intestine and seam cells; the Ground domain is predicted to form a cysteine-crosslinked protein involved in intercellular signalling, and it has subtle similarity to the N-terminal Hedge domain of HEDGEHOG proteins; GRD-13 is required for normal growth to ful…
(5) Other	477	WBGene00003163	R03E9.1	mdl-1	17.8558	5.39537	17.4	5.78e-09	1.52e-06	MAD-Like		mdl-1 encodes a basic helix-loop-helix (bHLH) protein similar to the vertebrate MAD transcriptional regulators; in vitro, MDL-1 can heterodimerize, and bind an E-box DNA sequence, with MXL-1, a C. elegans MAX-like bHLH protein; when expressed in rat embryonic fibroblasts, MDL-1 is able to suppress c-MYC/RAS-induced cell transformation, in a manner dependent upon an intact, predicted SIN3 interact…
(5) Other	478	WBGene00017065	D2092.4	D2092.4	7.91691	5.39237	16.4	1.05e-08	1.53e-06	not known		none available
(5) Other	479	WBGene00009578	F40F8.5a	F40F8.5	24.971	5.37592	12.6	1.43e-07	3.14e-06	not known		none available
(5) Other	480	WBGene00017362	F10G2.1	F10G2.1	12.5803	5.37372	12.9	1.16e-07	2.87e-06	not known		none available
(5) Other	481	WBGene00008515	F02C12.1	F02C12.1	7.02749	5.37266	12.8	1.23e-07	2.95e-06	not known		none available
(5) Other	482	WBGene00010118	F55F3.4	F55F3.4	0.107604	5.37234	2.88	0.0159	0.0222	not known		none available
(5) Other	483	WBGene00003754	T13A10.5a	nlp-16	3.64901	5.36984	11.3	3.94e-07	5.14e-06	Neuropeptide-Like Protein		nlp-16 encodes a predicted neuropeptide that does not belong to a multigene family in C. elegans and is not clearly related to well-characterized neuropeptides; the peptide encoded by nlp-16 has been isolated from Ascaris suum.
(5) Other	484	WBGene00016894	C53B7.3a	C53B7.3	11.9477	5.36745	17.4	5.94e-09	1.52e-06	not known		none available
(5) Other	485	WBGene00016447	C35D10.11	msd-4	0.596575	5.35582	3.27	0.00821	0.0122	Major Sperm protein Domain containing		none available
(5) Other	486	WBGene00016097	C25E10.8	C25E10.8	3.79374	5.35086	10.8	6.14e-07	6.31e-06	not known		C25E10.8 encodes a putative secreted TIL-domain protease inhibitor paralogous to SWM-1, ISL-1, and the products of 11 other C. elegans genes; C25E10.8 and its relatives are collectively similar to other TIL-domain protease inhibitors from nematodes, insects, and vertebrates; despite both swm-1 and C25E10.8 being mutated by the swm-1(ok1193) deletion, transgenic rescue of swm-1(ok1193) by SWM-1 al…
(5) Other	487	WBGene00006495	F31D5.3a	cpna-1	16.6562	5.34648	13.3	8.46e-08	2.58e-06	CoPiNe domain protein, Atypical		none available
(5) Other	488	WBGene00017302	F09F7.5a	F09F7.5	7.73521	5.34179	14.6	3.33e-08	1.98e-06	not known		F09F7.5 encodes, by alternative splicing, three isoforms of an unfamiliar protein required for in conjunction with LIN-35 for normally large brood size, in conjunction with CLK-2 for normally rapid growth, and for normally short lifespan; F09F7.5 binds equally well to Cdc42 and Rac GTPases in vitro, probably through its N-terminal P21-Rho-binding domain; F09F7.5 has no obvious orthologs outside o…
(5) Other	489	WBGene00015598	C08E3.6	fbxa-163	0.267285	5.34118	2.59	0.0264	0.0354	F-box A protein		This gene encodes a protein containing an F-box, a motif predicted to mediate protein-protein interactions either with homologs of yeast Skp-1p or with other proteins; this gene's encoded protein also contains an FTH/DUF38 motif, which may also mediate protein-protein interaction.
(5) Other	490	WBGene00009393	F35C5.5a	clec-62	14.7944	5.34033	9.02	3.35e-06	1.84e-05	C-type LECtin		none available
(5) Other	491	WBGene00020456	T12B5.10	fbxa-60	8.76555	5.33924	9.84	1.49e-06	1.06e-05	F-box A protein		This gene encodes a protein containing an F-box, a motif predicted to mediate protein-protein interactions either with homologs of yeast Skp-1p or with other proteins; this gene's encoded protein also contains an FTH/DUF38 motif, which may also mediate protein-protein interaction.
(5) Other	492	WBGene00022548	ZC196.4	ZC196.4	0.355926	5.33395	3.57	0.0049	0.00764	not known		none available
(5) Other	493	WBGene00018184	F38E9.1	F38E9.1	5.25843	5.3331	9.08	3.16e-06	1.77e-05	not known		none available
(5) Other	494	WBGene00045271	F07G6.10	F07G6.10	0.959033	5.32977	8.15	8.41e-06	3.5e-05	not known		none available
(5) Other	495	WBGene00010661	K08E3.1	tyr-2	6.41452	5.32624	18.3	3.65e-09	1.41e-06	TYRosinase		none available
(5) Other	496	WBGene00012810	Y43F8A.3a	Y43F8A.3	3.37393	5.32386	9.69	1.72e-06	1.17e-05	not known		none available
(5) Other	498	WBGene00008394	D1086.7	D1086.7	14.8581	5.3004	11.1	4.75e-07	5.63e-06	not known		none available
(5) Other	499	WBGene00010972	R01H10.4	R01H10.4	2.93132	5.3	11.8	2.57e-07	4.09e-06	not known		none available
(5) Other	500	WBGene00015574	C07G3.2	irg-1	0.724826	5.29249	4.97	0.00052	0.00102	Infection Response Gene		irg-1 encodes a protein containing a conserved DUF1768 domain, a domain of unknown function found as a stand-alone domain in bacterial and bacteriophage proteins as well as fused to proteins involved in riboflavin biosynthesis in bacteria and plants; irg-1 expression is induced in response to infection with pathogenic Pseudomonas aeruginosa, in a manner independent of the p38 MAPK pathway, but de…
(5) Other	502	WBGene00014793	H40L08.2a	H40L08.2	12.5234	5.29023	13.9	5.29e-08	2.3e-06	not known		none available
(5) Other	503	WBGene00016920	C54E4.5	C54E4.5	6.16717	5.28508	11.1	4.66e-07	5.55e-06	not known		none available
(5) Other	504	WBGene00016095	C25E10.5	C25E10.5	2.94492	5.28398	13.3	8.61e-08	2.6e-06	not known		none available
(5) Other	506	WBGene00007303	C04F12.9	rnh-1.3	2.77855	5.28271	9.54	2e-06	1.29e-05	RNase H		rnh-1.3 is one of four C. elegans genes that can encode an RNase H ribonuclease; rnh-1.3 transcripts are expressed from the L3 larval stage through adulthood.
(5) Other	507	WBGene00003980	F09C3.1	pes-7	14.3766	5.27779	11.8	2.58e-07	4.09e-06	Patterned Expression Site		pes-7 encodes an IQGAP ortholog; IQGAP proteins bind actin and CLIP-170, effect activities of the Rho family GTPases Rac1 and Cdc42, and function in cytokinesis; PES-7 is required for completing meiosis and mitosis, and for germline formation and maintenance; IQGAP's alpha-actinin domain is related distantly to alpha-actinin domains in calponin, transgelin (SM22 alpha), and the proto-oncogene Vav…
(5) Other	508	WBGene00194815	Y43F8B.23	Y43F8B.23	0.29669	5.27747	4.74	0.000736	0.00139	not known		none available
(5) Other	509	WBGene00008988	F20G2.5	F20G2.5	1.63095	5.27672	2.23	0.049	0.0623	not known		none available
(5) Other	510	WBGene00003842	F52F12.1a	oct-1	1.02199	5.27544	6.07	0.000108	0.000265	Organic Cation Transporter		oct-1 encodes a organic cation transporter predicted to contain twelve transmembrane domains; OCT-1 induces the transport of the prototypical organic cation tetraethylammonium when expressed in mammalian cells, and has broad substrate specificity; OCT-1 is orthologous to human OCTN2 (OMIM:603377, mutated in primary carnitine deficiency).
(5) Other	511	WBGene00045457	F33H12.7	F33H12.7	3.05138	5.27467	2.71	0.0216	0.0294	not known		none available
(5) Other	513	WBGene00008388	D1086.1	D1086.1	3.67646	5.26606	9.55	1.97e-06	1.28e-05	not known		none available
(5) Other	515	WBGene00020703	T22F7.4	T22F7.4	1.78927	5.2646	3.79	0.0034	0.00549	not known		none available
(5) Other	516	WBGene00017127	E04F6.8	E04F6.8	15.7062	5.25988	12.6	1.39e-07	3.1e-06	not known		none available
(5) Other	517	WBGene00015878	C17B7.4	C17B7.4	0.610026	5.25892	6.76	4.35e-05	0.000124	not known		none available
(5) Other	518	WBGene00014300	D2023.1b	D2023.1	4.61965	5.25274	8.63	5.04e-06	2.42e-05	not known		none available
(5) Other	519	WBGene00017964	F31F7.1a	F31F7.1	29.044	5.24645	12.6	1.43e-07	3.14e-06	not known		none available
(5) Other	520	WBGene00008865	F15G9.1a	F15G9.1	15.3816	5.24555	14.3	4.2e-08	2.1e-06	not known		none available
(5) Other	521	WBGene00010703	K09A9.6a	K09A9.6	6.45686	5.24384	18.9	2.55e-09	1.29e-06	not known		none available
(5) Other	523	WBGene00007473	C08H9.14	chil-8	0.197527	5.24023	3.36	0.00697	0.0105	CHItinase-Like		none available
(5) Other	524	WBGene00006589	T08B1.2a	tnt-4	3.75234	5.23514	11	5e-07	5.79e-06	TropoNin T		none available
(5) Other	525	WBGene00017783	F25E5.2	F25E5.2	0.218162	5.23262	4.09	0.00207	0.00351	not known		none available
(5) Other	526	WBGene00020009	R11F4.3	R11F4.3	4.30065	5.23247	13.2	9.23e-08	2.67e-06	not known		none available
(5) Other	527	WBGene00022573	ZC239.15	ZC239.15	0.187235	5.23226	3.33	0.00732	0.011	not known		none available
(5) Other	528	WBGene00014152	ZK930.2	ZK930.2	5.0612	5.22365	11.2	4.49e-07	5.47e-06	not known		none available
(5) Other	529	WBGene00002267	C44F1.3	lec-4	20.8825	5.22074	12.2	1.95e-07	3.47e-06	gaLECtin		lec-4 encodes a predicted galectin that exhibits sugar binding properties in vitro.
(5) Other	530	WBGene00044205	T13F3.8	T13F3.8	0.214326	5.22037	5	0.000495	0.000979	not known		none available
(5) Other	532	WBGene00017965	F31F7.2	F31F7.2	0.220211	5.2089	3.77	0.0035	0.00564	not known		none available
(5) Other	533	WBGene00020878	T28A11.16	T28A11.16	0.483138	5.20597	3.85	0.00303	0.00496	not known		none available
(5) Other	534	WBGene00014755	F40F12.8	F40F12.8	0.267879	5.2045	3.21	0.009	0.0132	not known		none available
(5) Other	535	WBGene00012085	T27D12.1a	T27D12.1	21.9879	5.20393	11.2	4.24e-07	5.29e-06	not known		none available
(5) Other	536	WBGene00006602	ZK54.2a	tps-1	10.6577	5.19529	18.1	3.99e-09	1.41e-06	Trehalose 6-Phosphate Synthase		none available
(5) Other	537	WBGene00000780	F49D11.8	cpn-4	8.60017	5.19285	13.9	5.36e-08	2.3e-06	CalPoNin		cpn-4 encodes a calponin homolog, most closely related to its paralog CPN-3 in C. elegans; CPN-4 is somewhat more similar to calponins per se (such as CLP1 and CLP2 in humans) than to the to the calponin paralogs transgelin (SM22 alpha) or neuronal protein NP25.
(5) Other	538	WBGene00016425	C34H4.2	C34H4.2	15.5232	5.19191	8.14	8.49e-06	3.52e-05	not known		none available
(5) Other	539	WBGene00003567	C10G8.5a	ncx-2	9.06257	5.19111	13.2	8.76e-08	2.6e-06	Na/Ca eXchangers		ncx-2 encodes, by alternative splicing, three full-length isoforms of a putative 3Na[+]/1Ca[2+] exchanger, orthologous to human SLC8A1-3 and paralogous to NCX-1 and NCX-3; NCX-2 is predicted to export free cytoplasmic Ca[2+] with low affinity but high capacity, being complemented by low-capacity/high-affinity Ca[2+] ATPase pumps such as MCA-1/-3; NCX-3 has tandem Calx-alpha and Calx-beta domains …
(5) Other	540	WBGene00009344	F32H2.7	F32H2.7	0.220211	5.18972	2.93	0.0148	0.0208	not known		none available
(5) Other	541	WBGene00020886	T28B4.3	ttr-6	22.615	5.18795	15.8	1.5e-08	1.64e-06	TransThyretin-Related family domain		none available
(5) Other	542	WBGene00009030	F21H7.4	clec-233	0.435385	5.1827	4.11	0.00199	0.00339	C-type LECtin		none available
(5) Other	543	WBGene00012399	Y6E2A.5	Y6E2A.5	0.345386	5.17794	4.38	0.0013	0.0023	not known		none available
(5) Other	544	WBGene00019057	F58F9.3a	F58F9.3	2.89133	5.17235	6.35	7.41e-05	0.000193	not known		none available
(5) Other	545	WBGene00004796	ZK520.2	sid-2	6.17165	5.17147	10.6	7.58e-07	7.03e-06	Systemic RNA Interference Defective		sid-2 encodes a novel, single-pass transmembrane protein; SID-2 is required for environmental-mediated (i.e. ingestion or soaking) RNA interference (RNAi); SID-2::GFP is expressed strongly in the intestine where it localizes to the apical (lumenal) membrane; SID-2::GFP is also expressed at much lower levels in the excretory duct cells; when expressed in Caenorhabditis briggsae, a related nematode…
(5) Other	546	WBGene00021835	Y54E10A.17	Y54E10A.17	12.3899	5.1675	15.1	2.47e-08	1.83e-06	not known		none available
(5) Other	547	WBGene00004902	T13B5.1	snf-3	12.0887	5.15918	16.4	1.08e-08	1.53e-06	Sodium: Neurotransmitter symporter Family		none available
(5) Other	548	WBGene00006762	Y37D8A.23a	unc-25	4.60734	5.15856	18.1	4.04e-09	1.41e-06	UNCoordinated		unc-25 encodes the C. elegans ortholog of the GABA neurotransmitter biosynthetic enzyme, glutamic acid decarboxylase (GAD); unc-25 activity is required for GABA synthesis and thus for normal synaptic transmission and GABA-mediated behaviors; UNC-25 is expressed specifically in the 26 GABAergic neurons as soon as they are generated and localizes to cell bodies, axonal branches, and synaptic region…
(5) Other	549	WBGene00020080	R52.9	math-37	1.87187	5.15343	9.5	2.07e-06	1.31e-05	MATH (meprin-associated Traf homology) domain containing		none available
(5) Other	553	WBGene00020413	T10E9.3	T10E9.3	1.56793	5.14829	6.84	3.95e-05	0.000115	not known		none available
(5) Other	555	WBGene00020813	T25G12.6	T25G12.6	4.23773	5.14297	10.3	9.77e-07	8.16e-06	not known		none available
(5) Other	556	WBGene00000545	Y39A3CL.5a	clp-4	16.8061	5.1403	16.1	1.26e-08	1.58e-06	CaLPain family		clp-4 encodes a large calpain subunit that is homologous to Drosophila CalpainB and the mammalian muscle-specific Calpain 3 proteins (OMIM:114240, mutations are associated with limb-girdle muscular dystrophy); by homology, CLP-4 is predicted to function as a nonlysosomal, calcium-dependent, cysteine protease that is involved in intracellular proteolysis and peptidolysis; however, as loss of clp-4…
(5) Other	557	WBGene00016559	C41A3.2a	C41A3.2	3.12772	5.14027	11.9	2.5e-07	4.01e-06	not known		none available
(5) Other	559	WBGene00013008	Y48E1B.9a	clec-146	4.01591	5.13475	12.2	2e-07	3.53e-06	C-type LECtin		none available
(5) Other	560	WBGene00003959	Y116F11B.3	pcp-4	7.89982	5.12758	9.08	3.14e-06	1.76e-05	Prolyl Carboxy Peptidase like		none available
(5) Other	561	WBGene00044574	F23G4.1	F23G4.1	0.179074	5.12444	3.39	0.00661	0.01	not known		none available
(5) Other	562	WBGene00019213	H20E11.1a	H20E11.1	4.41571	5.12335	9.51	2.05e-06	1.31e-05	not known		none available
(5) Other	563	WBGene00020424	T10H9.1	T10H9.1	0.150527	5.11995	2.62	0.025	0.0336	not known		none available
(5) Other	564	WBGene00012381	Y2H9A.4a	Y2H9A.4	0.83992	5.11558	6.37	7.18e-05	0.000188	not known		none available
(5) Other	565	WBGene00015097	B0273.1a	B0273.1	0.210573	5.11458	3.65	0.00425	0.00672	not known		none available
(5) Other	567	WBGene00044990	T25B9.11a	T25B9.11	0.112705	5.11042	4.68	0.000805	0.0015	not known		none available
(5) Other	568	WBGene00020581	T19D12.6	T19D12.6	16.737	5.10803	17.3	6.23e-09	1.52e-06	not known		none available
(5) Other	569	WBGene00007841	C31C9.7	C31C9.7	2.76398	5.1068	6.58	5.5e-05	0.00015	not known		none available
(5) Other	570	WBGene00017756	F23F12.12	F23F12.12	9.24433	5.10301	7.63	1.53e-05	5.43e-05	not known		none available
(5) Other	571	WBGene00003956	ZK112.1	pcp-1	12.0237	5.10099	3.71	0.00383	0.00612	Prolyl Carboxy Peptidase like		pcp-1 encodes a predicted prolylcarboxypeptidase (PRCP); by homology, PCP-1 is predicted to function as a lysosomal serine-type peptidase that hydrolyzes proteins containing a penultimate proline residue.
(5) Other	573	WBGene00003232	ZC506.4a	mgl-1	0.178346	5.09676	3.47	0.00581	0.00889	Metabotropic GLutamate receptor family		mgl-1 encodes a Group II metabotropic glutamate receptor (OMIM:604099, loss-of-function mutations in mice are associated with defects in long-term depression); by homology, MGL-1 is predicted to function as a pre-synaptic G protein-coupled receptor that, in response to glutamate binding, inhibits adenylyl cyclase activity; loss of mgl-1 activity reduces the excess fat of daf-7 mutants, indicating…
(5) Other	574	WBGene00044457	C18H7.11	C18H7.11	5.27621	5.0962	8.12	8.76e-06	3.6e-05	not known		none available
(5) Other	575	WBGene00004993	C28C12.5	spp-8	20.1109	5.09235	6.6	5.34e-05	0.000147	SaPosin-like Protein family		none available
(5) Other	576	WBGene00077770	M04D5.3	M04D5.3	5.70365	5.0903	11.4	3.57e-07	4.87e-06	not known		none available
(5) Other	577	WBGene00010453	K01B6.1	fozi-1	3.3766	5.09004	7.98	1.02e-05	4.04e-05	FOrmin-homology and ZInc finger domains		fozi-1 encodes an unusual zinc-finger protein that has two C2H2 zinc-finger motifs that probably mediate transcriptional regulation along with a glutamine-rich region and a vestigial formin homology 2 (FH2) domain that has lost its ability to polymerize actin but retained its ability to dimerize; during postembryonic development, FOZI-1 acts with MAB-5 and redundantly with HLH-1/CeMyoD to autonom…
(5) Other	578	WBGene00008341	C56A3.2a	ttr-44	20.2648	5.08883	9.47	2.13e-06	1.34e-05	TransThyretin-Related family domain		none available
(5) Other	579	WBGene00219286	C04F12.16	C04F12.16	0.258523	5.08566	3.07	0.0115	0.0166	not known		none available
(5) Other	580	WBGene00009722	F45D3.2a	F45D3.2	0.892037	5.08412	6.51	5.97e-05	0.000161	not known		none available
(5) Other	581	WBGene00015169	B0403.5	B0403.5	1.99494	5.0799	10.5	7.75e-07	7.06e-06	not known		none available
(5) Other	582	WBGene00007282	C03E10.5	clec-223	9.44498	5.07684	9.93	1.37e-06	9.99e-06	C-type LECtin		none available
(5) Other	583	WBGene00001863	F15G9.4a	him-4	48.4322	5.07452	10.5	8.29e-07	7.35e-06	High Incidence of Males (increased X chromosome loss)		The him-4 gene encodes a large (5198-residue) extracellular protein, called 'hemicentin', that belongs to the immunoglobulin superfamily.
(5) Other	584	WBGene00000784	F44C4.3	cpr-4	41.2455	5.06755	4.89	0.000584	0.00113	Cysteine PRotease related		cpr-4 encodes a cathepsin B-like cysteine protease expressed at all life stages.
(5) Other	585	WBGene00007777	C27D8.1	C27D8.1	0.32753	5.065	4.37	0.0013	0.00232	not known		none available
(5) Other	586	WBGene00077693	T04C12.11	T04C12.11	5.6673	5.06391	13.7	6.3e-08	2.38e-06	not known		none available
(5) Other	587	WBGene00044183	F09C6.13	F09C6.13	0.112705	5.06014	2.86	0.0164	0.0229	not known		none available
(5) Other	588	WBGene00020449	T12B5.2	fbxa-54	1.20535	5.05914	4.86	0.000608	0.00117	F-box A protein		This gene encodes a protein containing an F-box, a motif predicted to mediate protein-protein interactions either with homologs of yeast Skp-1p or with other proteins; this gene's encoded protein also contains an FTH/DUF38 motif, which may also mediate protein-protein interaction.
(5) Other	589	WBGene00017594	F19C7.4	F19C7.4	1.88368	5.059	6.85	3.89e-05	0.000113	not known		none available
(5) Other	590	WBGene00020114	R153.1a	pde-4	7.88715	5.05593	13.1	9.34e-08	2.67e-06	PhosphoDiEsterase		pde-4 encodes a cAMP phosphodiesterase orthologous to Drosophila dunce and the mammalian PDE4 family of phosphodiesterases; genetic analysis indicates that pde-4 activity is required for negative regulation of cAMP pools in the synaptic signaling network that controls locomotory rates and for regulation of sleep-like behavior (lethargus) during larval development; antibody staining of adult anima…
(5) Other	591	WBGene00006620	C07G1.1	svh-1	0.201036	5.05416	5.81	0.000154	0.000355	Suppressor of VHp-1 deletion lethality		svh-1 encodes a homolog of human TRYP1 and ELA2; mutation of human TRYP1 or ELA2 leads, respectively, to hereditary pancreatitis (OMIM:276000) or cyclic haematopoiesis (OMIM:162800).
(5) Other	592	WBGene00004157	W03D2.1a	pqn-75	5.0728	5.05402	10.4	9.22e-07	7.91e-06	Prion-like-(Q/N-rich)-domain-bearing protein		The protein product of this gene is predicted to contain a glutamine/asparagine (Q/N)-rich ('prion') domain, by the algorithm of Michelitsch and Weissman (as of the WS77 release of WormBase, i.e., in wormpep77).
(5) Other	593	WBGene00018250	F40H3.2	F40H3.2	4.43457	5.05285	8.45	6.1e-06	2.76e-05	not known		none available
(5) Other	594	WBGene00020735	T23F2.2a	T23F2.2	4.063	5.04812	10.9	5.66e-07	6.06e-06	not known		none available
(5) Other	596	WBGene00009663	F43G6.11	hda-5	5.25927	5.04215	14.5	3.64e-08	2.04e-06	Histone DeAcetylase		none available
(5) Other	597	WBGene00007894	C33D3.3	C33D3.3	0.220211	5.04045	3.83	0.00315	0.00514	not known		none available
(5) Other	598	WBGene00010064	F54F7.2	F54F7.2	7.76287	5.03873	11.3	4e-07	5.17e-06	not known		none available
(5) Other	599	WBGene00019183	H10E21.2	npr-30	0.339291	5.03268	5.96	0.000125	0.0003	NeuroPeptide Receptor family		none available
(5) Other	600	WBGene00000952	E02H4.1	del-1	0.16201	5.02633	2.77	0.0193	0.0265	DEgenerin Like		del-1 encodes an ion channel protein of the DEG/ENaC (degenerin/epithelial Na+ channel) family; like other members of the degenerin family, DEL-1 is predicted to function as a sensory mechanotransduction channel, however detailed analysis of the DEL-1 mutant phenotype has not yet been reported; DEL-1 is expressed postembryonically in the VA and VB motor neurons and in the FLP sensory neurons; the…
(5) Other	601	WBGene00021977	Y58A7A.3	Y58A7A.3	8.74657	5.0258	12.4	1.6e-07	3.29e-06	not known		none available
(5) Other	602	WBGene00011460	T05A10.3	ttr-14	5.73282	5.022	10.9	5.77e-07	6.13e-06	TransThyretin-Related family domain		none available
(5) Other	603	WBGene00009306	F32A7.5a	F32A7.5	23.5865	5.01735	13.9	5.44e-08	2.31e-06	not known		none available
(5) Other	604	WBGene00014562	Y17D7B.7	Y17D7B.7	3.56088	5.01594	8.22	7.81e-06	3.3e-05	not known		none available
(5) Other	606	WBGene00004210	Y110A2AL.8a	ptc-3	22.953	5.01489	12.9	1.09e-07	2.8e-06	PaTChed family		ptc-3 encodes an ortholog of Drosophila PATCHED (PTC) and human PTCH (OMIM:601309, mutated in basal cell nevus syndrome), which defines one of seven paralogous families of sterol sensing domain (SSD) proteins; PTC-3 is strongly required for normal molting from L1 to L3 larval stages; PTC-3 is also required for normal growth to full size and for viability.
(5) Other	607	WBGene00020854	T27C4.1	T27C4.1	7.72447	5.01127	12.6	1.43e-07	3.14e-06	not known		none available
(5) Other	608	WBGene00020315	T07E3.4a	T07E3.4	11.2176	5.01002	13.8	5.68e-08	2.31e-06	not known		This gene encodes a protein containing an F-box, a motif predicted to mediate protein-protein interactions either with homologs of yeast Skp-1p or with other proteins.
(5) Other	609	WBGene00045405	D1086.18	D1086.18	0.179341	5.00919	3.19	0.00935	0.0137	not known		none available
(5) Other	610	WBGene00014262	ZK1321.4a	ZK1321.4	16.2465	5.00668	11.5	3.44e-07	4.78e-06	not known		none available
(5) Other	611	WBGene00013078	Y51A2D.10a	ttr-25	12.461	5.00625	16.1	1.25e-08	1.58e-06	TransThyretin-Related family domain		none available
(5) Other	612	WBGene00017374	F10G7.11	ttr-41	24.5822	5.00544	10.1	1.17e-06	9.08e-06	TransThyretin-Related family domain		none available
(5) Other	613	WBGene00015122	B0302.5	B0302.5	6.97994	5.00524	11.9	2.42e-07	3.95e-06	not known		none available
(5) Other	614	WBGene00022287	Y75B7AR.1	Y75B7AR.1	0.112705	5.00228	2.49	0.0314	0.0414	not known		none available
(5) Other	616	WBGene00002268	ZK1248.16	lec-5	47.9918	4.99293	12.4	1.64e-07	3.29e-06	gaLECtin		none available
(5) Other	617	WBGene00020230	T05A8.4	nep-2	8.63438	4.98421	13.6	6.86e-08	2.41e-06	NEPrilysin metallopeptidase family		T05A8.4 encodes a neprilysin; neprilysins are thermolysin-like zinc metallopeptidases, found on the outer surface of animal cells, that negatively regulate small signalling peptides (e.g., enkephalin, tachykinin, insulin, and natriuretic peptides) by cleaving them; while T05A8.4 is an ortholog of mammalian neutral endopeptidase (NEP), expressed on the brush-border membranes of kidney; more genera…
(5) Other	619	WBGene00015954	C18B2.3	C18B2.3	5.34164	4.97635	12.4	1.68e-07	3.32e-06	not known		none available
(5) Other	620	WBGene00022303	Y76B12C.9	Y76B12C.9	0.186195	4.97278	3.25	0.00836	0.0124	not known		none available
(5) Other	621	WBGene00044492	Y54G2A.49a	Y54G2A.49	2.55455	4.96609	5.82	0.000151	0.00035	not known		none available
(5) Other	622	WBGene00044759	T06E6.15	T06E6.15	0.14199	4.96447	3.47	0.00575	0.00881	not known		none available
(5) Other	624	WBGene00003893	C44B12.2a	ost-1	101.425	4.96021	8.79	4.25e-06	2.16e-05	OSTeonectin (SPARC) related		ost-1 encodes the C. elegans ortholog of the conserved basement membrane glycoprotein component osteonectin/SPARC/BM-40; loss of ost-1 function via RNAi indicates that ost-1 activity is required for embryonic and larval development, as well as for normal gut development, body size, and fecundity; an OST-1::GFP reporter fusion protein localizes to the basement membranes along body wall and sex mus…
(5) Other	625	WBGene00019113	F59E11.7a	F59E11.7	0.34875	4.95976	3.8	0.00334	0.00541	not known		none available
(5) Other	626	WBGene00219688	F36A4.21	linc-21	0.872113	4.95967	9.84	1.5e-06	1.06e-05	Long Intervening Non-Coding RNA		none available
(5) Other	627	WBGene00011124	R07H5.4	sdz-27	16.9661	4.95792	12	2.25e-07	3.78e-06	SKN-1 Dependent Zygotic transcript		none available
(5) Other	629	WBGene00008233	C50F4.8	C50F4.8	8.96119	4.95029	10.7	6.78e-07	6.64e-06	not known		none available
(5) Other	630	WBGene00002173	F33D4.2a	itr-1	25.1409	4.94843	15.3	2.12e-08	1.73e-06	Inositol Triphosphate Receptor		itr-1 encodes a putative inositol (1,4,5) trisphosphate receptor that affects the defecation cycle and pharyngeal pumping, and also affects ovulation in a pathway downstream of LET-23; interacts with UNC-54 in vivo, and is expressed in the adult intestine, pharynx, excretory cell, germ line, and spermatheca, with limited neuronal expression.
(5) Other	631	WBGene00005548	F33H12.5	sri-36	0.0956779	4.94838	2.32	0.0421	0.0543	Serpentine Receptor, class I		none available
(5) Other	632	WBGene00019660	K11H12.4	K11H12.4	2.03839	4.94775	6.19	9.1e-05	0.000229	not known		none available
(5) Other	633	WBGene00003966	C27H5.1	pdl-1	0.213136	4.9455	3.02	0.0125	0.0178	Phosphodiesterase DeLta-like		pdl-1 encodes the C. elegans ortholog of the mammalian cGMP phosphodiesterase delta subunit (PDE6D); genetic analyses indicate that pdl-1 plays a role in regulating gustatory plasticity.
(5) Other	634	WBGene00001633	Y66A7A.6	gly-8	25.3216	4.94378	18.9	2.58e-09	1.29e-06	GLYcosylation related		gly-8 encodes a predicted transmembrane polypeptide N-acetylgalactosaminyl transferase (ppGaNTase) similar to the essential Drosophila ppGaNTase encoded by Pgant35A; by homology, GLY-8 is predicted to function as a Golgi enzyme that catalyzes transfer of N-acetylgalactosamine to serine and threonine-containing acceptor peptides, thus initiating mucin-type O-glycosylation; as loss of gly-8 activit…
(5) Other	635	WBGene00012757	Y41C4A.11	Y41C4A.11	6.19084	4.94265	4.06	0.00216	0.00365	not known		Y41C4A.11 encodes a divergent paralog of F38E11.5, the beta' (beta-prime) subunit of the coatomer (COPI) complex.
(5) Other	636	WBGene00009340	F32G8.4	best-14	14.6372	4.92621	12.4	1.63e-07	3.29e-06	BESTrophin (chloride channel) homolog		none available
(5) Other	637	WBGene00009943	F52G2.3	F52G2.3	2.33282	4.9257	11.4	3.56e-07	4.87e-06	not known		none available
(5) Other	638	WBGene00016788	C49G7.10	C49G7.10	6.20678	4.92001	9.37	2.37e-06	1.43e-05	not known		none available
(5) Other	639	WBGene00016719	C46F9.3	math-24	1.56557	4.91135	9.53	2.01e-06	1.29e-05	MATH (meprin-associated Traf homology) domain containing		The C46F9.3 gene encodes a protein with a meprin-associated Traf homology (MATH) domain that may be involved in apoptosis.
(5) Other	641	WBGene00007591	C14H10.1	C14H10.1	16.0215	4.90886	11	5.12e-07	5.81e-06	not known		none available
(5) Other	642	WBGene00045305	ZC250.4	ZC250.4	8.20616	4.90812	13.6	6.47e-08	2.38e-06	not known		none available
(5) Other	643	WBGene00021335	Y34D9A.11	spp-23	6.2826	4.9044	10.7	6.91e-07	6.69e-06	SaPosin-like Protein family		none available
(5) Other	645	WBGene00013763	Y113G7B.14	Y113G7B.14	2.36328	4.90268	10.8	6.19e-07	6.32e-06	not known		none available
(5) Other	646	WBGene00004112	C46G7.4a	pqn-22	33.0708	4.89968	12.6	1.45e-07	3.16e-06	Prion-like-(Q/N-rich)-domain-bearing protein		The protein product of this gene is predicted to contain a glutamine/asparagine (Q/N)-rich ('prion') domain, by the algorithm of Michelitsch and Weissman (as of the WS77 release of WormBase, i.e., in wormpep77).
(5) Other	647	WBGene00021354	Y37E3.16	fpn-1.1	11.3022	4.89938	14.5	3.69e-08	2.05e-06	FerroPortiN		none available
(5) Other	649	WBGene00016283	C31B8.8	C31B8.8	5.48663	4.89828	17	7.23e-09	1.52e-06	not known		none available
(5) Other	651	WBGene00018971	F56D6.2	clec-67	13.2885	4.89406	8.9	3.8e-06	2.02e-05	C-type LECtin		clec-67 encodes a C-type lectin; clec-67 expression is upregulated in response to bacterial infection; clec-67 is expressed in the intestine and its expression is regulated by the ELT-2 GATA transcription factor.
(5) Other	652	WBGene00021079	W08A12.2	W08A12.2	3.70316	4.89383	10.7	6.75e-07	6.62e-06	not known		none available
(5) Other	653	WBGene00017586	F19B10.4	F19B10.4	0.128201	4.89368	3.25	0.0084	0.0124	not known		none available
(5) Other	655	WBGene00009311	F32A11.7	mltn-1	2.12102	4.8894	7.87	1.16e-05	4.42e-05	MLt-TeN (mlt-10) related		none available
(5) Other	656	WBGene00012525	Y32B12C.1	Y32B12C.1	0.225378	4.88554	2.73	0.0207	0.0283	not known		none available
(5) Other	658	WBGene00019064	F58G4.1	myo-5	9.61265	4.87612	11	5.17e-07	5.84e-06	MYOsin heavy chain structural genes		none available
(5) Other	660	WBGene00004173	ZC15.8	pqn-94	1.80667	4.87381	6.83	4e-05	0.000116	Prion-like-(Q/N-rich)-domain-bearing protein		The protein product of this gene is predicted to contain a glutamine/asparagine (Q/N)-rich ('prion') domain, by the algorithm of Michelitsch and Weissman (as of the WS77 release of WormBase, i.e., in wormpep77).
(5) Other	661	WBGene00016535	C39D10.8a	C39D10.8	7.18281	4.87241	17.5	5.47e-09	1.52e-06	not known		none available
(5) Other	662	WBGene00004810	Y60A3A.18	skr-4	9.10759	4.87178	8.65	4.92e-06	2.38e-05	SKp1 Related (ubiquitin ligase complex component)		The skr-4 gene encodes a homolog of Skp1 in S. cerevisiae that has no known function in vivo, since skr-4(RNAi) animals are at least superficially normal.
(5) Other	663	WBGene00016219	C29F9.4	C29F9.4	7.45898	4.87006	9.66	1.77e-06	1.2e-05	not known		none available
(5) Other	664	WBGene00009523	F38A1.10	clec-165	0.522604	4.86949	4.49	0.00109	0.00197	C-type LECtin		none available
(5) Other	666	WBGene00016769	C49C8.5	C49C8.5	15.3775	4.86657	8.3	7.17e-06	3.1e-05	not known		none available
(5) Other	668	WBGene00017687	F22A3.1a	ets-4	7.19552	4.86454	8.33	6.94e-06	3.02e-05	ETS class transcription factor		none available
(5) Other	669	WBGene00013654	Y105C5B.15a	Y105C5B.15	27.768	4.86411	7.52	1.72e-05	5.97e-05	not known		none available
(5) Other	670	WBGene00016172	C27H5.2a	C27H5.2	4.24564	4.86167	13.7	6.26e-08	2.37e-06	not known		none available
(5) Other	671	WBGene00001461	Y48D7A.2	flp-18	6.11101	4.86142	15.3	2.09e-08	1.73e-06	FMRF-Like Peptide		flp-18 encodes the only FMRFamide-related neuropeptide (FaRP) encoded by the C. elegans genome, other than flp-21, that activates the solitary (215V) form of NPR-1 in Xenopus oocytes; in addition, FLP-18 can activated the social (215F) form of NPR-1 in pharyngeal assays; FLP-18 is expressed in the interneurons AVA, AIY and RIG, the motor neuron RIM and the pharyngeal neurons M2 and M3.
(5) Other	673	WBGene00006586	W03F8.1	tni-4	8.9138	4.8541	13.1	9.69e-08	2.7e-06	TropoNin I		tni-4 encodes one of the four elegans troponin I proteins; tni-4 is required for the normal development of the pharynx during embryonic development; TNI-4 interacts only with the pharyngeal troponin C; tni-4 is expressed exclusively in the pharyngeal muscles.
(5) Other	674	WBGene00007807	C29F3.7a	C29F3.7	12.0327	4.85113	8.76	4.37e-06	2.2e-05	not known		C29F3.7 encodes a CUB-like domain-containing protein; C29F3.7 is involved in the transcriptional, innate immune response towards several different bacterial pathogens.
(5) Other	675	WBGene00019958	R08E3.2	R08E3.2	11.7116	4.84822	5.04	0.000465	0.000926	not known		none available
(5) Other	676	WBGene00017979	F32B5.6a	F32B5.6	17.8258	4.84576	15.5	1.8e-08	1.7e-06	not known		none available
(5) Other	677	WBGene00016332	C32F10.4	C32F10.4	9.44109	4.83782	6.12	0.000101	0.000251	not known		none available
(5) Other	678	WBGene00019478	K07C11.5	cri-2	8.36039	4.83778	15.4	1.97e-08	1.73e-06	Conserved Regulator of Innate immunity		K07C11.5 is orthologous to the human gene SIMILAR TO TISSUE INHIBITOR OF METALLOPROTEINASE 3 (SORSBY FUNDUS DYSTROPHY, PSEUDOINFLAMMATORY) (TIMP3; OMIM:188826), which when mutated leads to disease.
(5) Other	679	WBGene00010150	F56D5.6a	F56D5.6	10.6578	4.83629	11.8	2.58e-07	4.09e-06	not known		none available
(5) Other	680	WBGene00008868	F15G9.5	F15G9.5	0.9125	4.83383	5.88	0.00014	0.000328	not known		none available
(5) Other	681	WBGene00008220	C50B6.7	C50B6.7	7.68038	4.82558	5.16	0.000387	0.000789	not known		none available
(5) Other	682	WBGene00006610	F15A2.2	tre-4	3.023	4.82551	12.4	1.63e-07	3.29e-06	TREhalase		none available
(5) Other	684	WBGene00011726	T12A7.5	lpr-2	0.411829	4.81782	4.11	0.002	0.0034	LiPocalin-Related protein		lpr-2 encodes one of seven C. elegans proteins related to the lipocalin family of structurally related, low molecular weight, secreted proteins that bind and transport lipophilic molecules and participate in intercellular signaling.
(5) Other	685	WBGene00011105	R07E3.4	R07E3.4	6.52951	4.81675	10.6	7.54e-07	7.01e-06	not known		none available
(5) Other	686	WBGene00015172	B0410.3	B0410.3	9.34419	4.81554	13.2	8.73e-08	2.6e-06	not known		none available
(5) Other	687	WBGene00044484	C09B9.8a	hot-9	0.18903	4.81427	2.95	0.0142	0.02	Homolog of Odr-2 (Two)		none available
(5) Other	688	WBGene00012123	T28D6.3	T28D6.3	11.4755	4.81361	8.06	9.31e-06	3.77e-05	not known		none available
(5) Other	689	WBGene00021641	Y47G6A.15	Y47G6A.15	1.63493	4.80924	4.43	0.00119	0.00213	not known		none available
(5) Other	690	WBGene00015633	C09D4.2	C09D4.2	6.80558	4.80911	14.6	3.44e-08	1.98e-06	not known		none available
(5) Other	691	WBGene00005643	C05E4.1	srp-2	8.85018	4.80884	14.3	4.13e-08	2.09e-06	SeRPin		srp-2 encodes an ovalbumin-like serpin (ov-serpin), a member of the serine protease inhibitor superfamily that includes mammalian neuroserpin; SRP-2 is predicted to function as a suicide substrate that inhibits the proteolytic activity of serine proteases, and in vitro, recombinant SRP-2 is able to inhibit granzyme B activity; srp-2 expression is detected in hypodermal cells, particularly in the …
(5) Other	692	WBGene00007877	C33A11.1	C33A11.1	8.06464	4.79572	9.29	2.54e-06	1.51e-05	not known		none available
(5) Other	693	WBGene00016201	C28H8.11a	tdo-2	21.3113	4.79569	12.2	1.97e-07	3.5e-06	Tryptophan 2,3-DiOxygenase		none available
(5) Other	694	WBGene00016266	C30F12.7	idhg-2	10.2796	4.79385	11.7	2.88e-07	4.36e-06	Isocitrate DeHydrogenase Gamma		C30F12.7 encodes the C. elegans homolog of the gamma subunit of an NAD+-dependent mitochondrial isocitrate dehydrogenase; by homology, the product of C30F12.7 is predicted to catalyze the formation of alpha-ketoglutarate from isocitrate as part of the citric acid cycle.
(5) Other	695	WBGene00004811	F47H4.10	skr-5	0.714211	4.7933	3.68	0.00405	0.00644	SKp1 Related (ubiquitin ligase complex component)		The skr-5 gene encodes a homolog of Skp1 in S. cerevisiae that has no known function in vivo, since skr-5(RNAi) animals are at least superficially normal.
(5) Other	696	WBGene00020954	W02G9.4	W02G9.4	5.60021	4.78968	8.26	7.47e-06	3.2e-05	not known		none available
(5) Other	697	WBGene00002189	ZK909.2a	kin-1	15.1278	4.78732	16.7	8.83e-09	1.52e-06	protein KINase		kin-1 encodes multiple isoforms of a serine/threonine protein kinase that is orthologous to cAMP-dependent protein kinase (protein kinase A or PKA) catalytic subunits; KIN-1 is able to phosphorylate histone H2B in vitro and is associated with both particulate (~65%) and cytosolic (35%) cellular fractions; KIN-1 is expressed at low levels during embryogenesis, but its expression level increases in…
(5) Other	698	WBGene00015476	C05D9.9a	C05D9.9	2.22915	4.78722	7.12	2.78e-05	8.71e-05	not known		none available
(5) Other	700	WBGene00012782	Y43C5A.2	Y43C5A.2	43.695	4.78418	7.81	1.24e-05	4.64e-05	not known		none available
(5) Other	701	WBGene00012840	Y43F8C.20	grsp-1	9.13178	4.78244	14.6	3.39e-08	1.98e-06	Glycine Rich Secreted Protein		none available
(5) Other	702	WBGene00007142	B0334.1	ttr-18	17.307	4.78206	16.3	1.09e-08	1.53e-06	TransThyretin-Related family domain		none available
(5) Other	703	WBGene00016451	C35D10.15	clec-6	0.150527	4.78154	2.66	0.0235	0.0318	C-type LECtin		none available
(5) Other	704	WBGene00007340	C05D12.2	C05D12.2	2.14664	4.78131	8.55	5.44e-06	2.55e-05	not known		none available
(5) Other	705	WBGene00019780	M60.4a	M60.4	16.6677	4.78075	9.21	2.75e-06	1.61e-05	not known		none available
(5) Other	706	WBGene00017773	F25B5.1a	dct-6	14.7345	4.77994	18.2	3.76e-09	1.41e-06	DAF-16/FOXO Controlled, germline Tumor affecting		none available
(5) Other	708	WBGene00021602	Y46H3B.1	clec-205	2.63591	4.77387	12.4	1.64e-07	3.29e-06	C-type LECtin		none available
(5) Other	709	WBGene00017063	D2092.1a	D2092.1	2.77304	4.7725	12.7	1.32e-07	2.98e-06	Multiple C2 and Transmembrane region Protein family homolog		none available
(5) Other	710	WBGene00086560	ZK355.8	ZK355.8	0.133844	4.77131	2.33	0.0412	0.0531	not known		none available
(5) Other	712	WBGene00001190	Y37A1B.11a	egl-23	1.32796	4.76753	7.42	1.95e-05	6.57e-05	EGg Laying defective		egl-23 encodes one of 44 C. elegans TWK (two-P domain K+) potassium channel subunits that contain two pore-forming domains and four transmembrane domains; egl-23 was originally defined by gain-of-function mutations that result in defects in locomotion, egg-laying, and enteric muscle activation; loss of egl-23 function via reversion or RNA-mediated interference (RNAi) does not result in any abnorm…
(5) Other	713	WBGene00006603	F19H8.1a	tps-2	37.9625	4.76498	12.8	1.21e-07	2.93e-06	Trehalose 6-Phosphate Synthase		tps-2 encodes one of two trehalose-6-phosphate synthase proteins in C. elegans, and RNAi of both enzymes leads to a more than 90% reduction decrease in trehalose levels, but does not appear to affect viability or development; the tps-2 mRNA is expressed throughout development.
(5) Other	714	WBGene00002174	W03D8.6a	itx-1	23.2646	4.76432	13.1	9.95e-08	2.7e-06	InTestinal NeureXin-like		itx-1 encodes one of two Caspr orthologues found in the C. elegans genome; Caspr proteins belong to the Neurexin superfamily and are involved in mediating cell-cell contacts and in the formation of specialized membrane-domains in polarized epithelial and nerve cells; RNA interference of itx-1 suggests that itx-1 is involved in the correct positioning and maintenance of apical junctions and in mai…
(5) Other	715	WBGene00002041	Y66H1A.6a	hum-8	14.2413	4.76295	17.8	4.7e-09	1.46e-06	Heavy chain, Unconventional Myosin		none available
(5) Other	716	WBGene00009192	F27E5.1	F27E5.1	12.6629	4.75843	10.2	1.08e-06	8.71e-06	not known		none available
(5) Other	717	WBGene00007583	C14B4.2	C14B4.2	10.1076	4.7581	12.1	2.14e-07	3.67e-06	not known		none available
(5) Other	718	WBGene00004023	T16D1.2	pho-4	3.9148	4.75724	8.82	4.13e-06	2.12e-05	intestinal acid PHOsphatase		none available
(5) Other	719	WBGene00013275	Y57A10B.3	btb-14	5.98678	4.75495	11.6	3.13e-07	4.55e-06	BTB (Broad/complex/Tramtrack/Bric a brac) domain protein		none available
(5) Other	721	WBGene00018309	F41G4.5	F41G4.5	0.214326	4.74926	4	0.0024	0.00402	not known		none available
(5) Other	722	WBGene00008490	F01D4.8	F01D4.8	0.3263	4.74842	3.19	0.00928	0.0136	not known		none available
(5) Other	723	WBGene00003759	Y47D3B.2a	nlp-21	4.16895	4.74827	15.1	2.34e-08	1.8e-06	Neuropeptide-Like Protein		nlp-21 encodes nine predicted neuropeptide-like proteins; in C. elegans, nlp-21 is part of the GGARAF neuropeptide family that also contains nlp-9; nlp-21 is expressed in a variety of neurons, including AFD, five head neurons, the ventral nerve cord, one anterior pharyngeal neuron, and one tail neuron; nlp-21 expression is also detected in the embryo and the intestine; NLP-21 is tranported by den…
(5) Other	724	WBGene00015390	C03F11.4	C03F11.4	3.101	4.7478	11.3	3.97e-07	5.15e-06	not known		none available
(5) Other	725	WBGene00003404	C52A11.4a	mpz-1	10.9439	4.74735	15.2	2.32e-08	1.8e-06	Multiple PDZ domain protein		mpz-1 encodes a multi-PDZ domain scaffold protein; mpz-1(RNAi) animals have reduced serotonin (5-HT)-stimulated egg laying unless truncated SER-1 is transgenically expressed in vulval muscle; overexpressed MPZ-1 PDZ domain 10 also reduces SER-1-mediated egg laying; the PDZ domain 10 of MPZ-1 binds the C-terminal PDZ-binding motif (ETFL) of the 5-HT receptor SER-1; MPZ-1 also physically interacts …
(5) Other	726	WBGene00007394	C06H5.6a	C06H5.6	10.3699	4.74701	15.7	1.62e-08	1.64e-06	not known		none available
(5) Other	727	WBGene00016749	C48E7.1	C48E7.1	14.3759	4.74668	14.7	3.08e-08	1.98e-06	not known		none available
(5) Other	728	WBGene00008019	C38H2.2	C38H2.2	13.3923	4.74553	16.1	1.29e-08	1.58e-06	not known		C38H2.2 encodes a core 1 UDP-Gal:GalNAcalpha1-Ser/Thr beta1,3-galactosyltransferase (core 1 beta3-Gal-T or T-synthase, EC2.4.1.122); C38H2.2 protein is predicted to be primarily extracellular, with an N-terminal transmembrane domain; C38H2.2 shares 6 conserved cysteine residues with all known T-synthases, and is ubiquitously expressed; enzymatically active C38H2.2 can be generated from insect but…
(5) Other	730	WBGene00004184	T19D2.2	T19D2.2	7.17624	4.74086	11.5	3.47e-07	4.79e-06	not known		none available
(5) Other	731	WBGene00023417	C25E10.9a	swm-1	3.95396	4.73965	11.6	3.24e-07	4.65e-06	Sperm activation Without Mating		swm-1 encodes a putative secreted TIL-domain protease inhibitor that, in males, inhibits unpolarized round spermatids from remodelling themselves into motile spermatozoa until their transfer to a hermaphrodite; SWM-1 is also required for efficient sperm transfer, and thus for male fertility; SWM-1 is biologically active from spermatogenesis in L4 larvae onward into adulthood, and functions non-au…
(5) Other	732	WBGene00016292	C31H2.1a	tbc-7	6.55769	4.73905	13.5	7.08e-08	2.41e-06	TBC (Tre-2/Bub2/Cdc16) domain family		none available
(5) Other	733	WBGene00021975	Y58A7A.1a	Y58A7A.1	5.27463	4.73774	9.34	2.43e-06	1.46e-05	not known		none available
(5) Other	734	WBGene00004809	F44G3.6	skr-3	11.4124	4.73741	10.6	7.69e-07	7.06e-06	SKp1 Related (ubiquitin ligase complex component)		skr-3 encodes a homolog of Skp1 in S. cerevisiae; skr-3 transcripts are upregulated in response to pathogenic bacteria, and skr-3(RNAi) results in enhanced susceptibility to infection.
(5) Other	735	WBGene00008739	F13D12.3	F13D12.3	6.95295	4.73377	8.74	4.5e-06	2.24e-05	not known		none available
(5) Other	736	WBGene00020317	T07E3.6a	pdf-1	5.97796	4.72565	12.3	1.72e-07	3.38e-06	PDF (arthropod Pigment Dispersing Factor) homolog		none available
(5) Other	737	WBGene00018195	F39E9.2	btb-16	5.72246	4.72487	10.5	8.11e-07	7.26e-06	BTB (Broad/complex/Tramtrack/Bric a brac) domain protein		none available
(5) Other	738	WBGene00001955	F58A4.7a	hlh-11	11.6872	4.72216	11.7	2.91e-07	4.37e-06	Helix Loop Helix		none available
(5) Other	739	WBGene00012857	Y44A6E.1a	pbo-5	0.901274	4.71877	5.45	0.000255	0.000548	PBOc defective (defecation)		pbo-5 encodes a proton-gated ion channel required for normal posterior body muscle contractions during defecation; PBO-5 has no obvious non-nematode orthologs, but is paralogous to PBO-6/LGC-3; PBO-5 is expressed in the most posterior bodywall muscles, and in the head neurons RIFL, RIFR, and RIS; heterologous PBO-5/PBO-6 produces strong currents in Xenopus oocytes when stimulated by pH 6.0; pbo-5…
(5) Other	740	WBGene00012748	Y40H7A.11	Y40H7A.11	0.16201	4.71832	2.9	0.0153	0.0215	not known		none available
(5) Other	741	WBGene00012387	Y6B3B.1	Y6B3B.1	1.24269	4.71613	7.48	1.82e-05	6.23e-05	not known		none available
(5) Other	742	WBGene00020939	W02D7.3	W02D7.3	0.14199	4.71599	3.21	0.00903	0.0133	not known		none available
(5) Other	743	WBGene00009257	F29G6.1	F29G6.1	0.243895	4.7147	4.51	0.00106	0.00192	not known		none available
(5) Other	744	WBGene00009706	F44G3.2	F44G3.2	9.39438	4.71255	2.38	0.0379	0.0492	not known		none available
(5) Other	745	WBGene00018400	F43H9.4	F43H9.4	5.05788	4.70765	9.11	3.05e-06	1.73e-05	not known		none available
(5) Other	746	WBGene00018885	F55E10.6	F55E10.6	4.86025	4.70605	12.1	2.16e-07	3.69e-06	not known		none available
(5) Other	747	WBGene00004227	K07C10.1	ptr-13	12.0677	4.70595	17.4	5.89e-09	1.52e-06	PaTched Related family		ptr-13 encodes a nematode-specific member of the sterol sensing domain (SSD) proteins, distantly paralogous to Drosophila PATCHED (PTC) and human PTCH (OMIM:601309, mutated in basal cell nevus syndrome); PTR-13 is weakly required for normal molting from L4 to adult stages; PTR-13 is also required for normal growth to full size and locomotion.
(5) Other	748	WBGene00017659	F21C10.10	F21C10.10	25.6888	4.70524	8.59	5.26e-06	2.49e-05	not known		none available
(5) Other	749	WBGene00043997	Y79H2A.12	Y79H2A.12	0.137102	4.70494	3.1	0.0108	0.0157	not known		none available
(5) Other	750	WBGene00019014	F57C12.2	F57C12.2	1.39922	4.70395	6.15	9.6e-05	0.00024	not known		none available
(5) Other	751	WBGene00011540	T06E6.10	T06E6.10	7.7994	4.70267	13.1	9.95e-08	2.7e-06	not known		none available
(5) Other	752	WBGene00003175	C44B11.3	mec-12	8.97307	4.70026	8.52	5.66e-06	2.62e-05	MEChanosensory abnormality		mec-12 encodes an alpha-tubulin; MEC-12 is required for normal mechanosensory response to gentle touch, and specifically for formation of the 15-protofilament microtubule bundle present in the touch receptor neurons; mec-12 interacts genetically with mec-5, which encodes a unique C. elegans collagen secreted by the hypodermis; MEC-12 is highly expressed in the touch neurons as well as in several …
(5) Other	753	WBGene00020478	T13C2.2	T13C2.2	0.193594	4.69894	2.4	0.037	0.0482	not known		none available
(5) Other	754	WBGene00001172	C51E3.7a	egl-3	25.6821	4.69843	12.2	1.94e-07	3.47e-06	EGg Laying defective		The egl-3 gene encodes a homolog of a mammalian proprotein convertase that participates in peptide secretion.
(5) Other	755	WBGene00017678	F21F8.4	asp-12	3.57918	4.69787	9.34	2.43e-06	1.46e-05	ASpartyl Protease		none available
(5) Other	756	WBGene00013118	Y51H4A.24	Y51H4A.24	3.39126	4.69424	11.1	4.84e-07	5.71e-06	not known		none available
(5) Other	758	WBGene00018532	F47B7.1	F47B7.1	19.6117	4.68949	10.4	8.76e-07	7.64e-06	not known		none available
(5) Other	759	WBGene00002179	T22C1.7	jph-1	7.79832	4.68934	14.3	4.18e-08	2.1e-06	JunctoPHilin		jph-1 encodes a junctophilin, a protein that belongs to a transmembrane family of proteins implicated in the formation of the junctional membrane complex that forms between the plasma membrane and the endoplasmic reticulum in excitable cells; this complex facilitates cross-talk between the cell surface and intracellular ionic channels; RNA interference of jph-1 results in a locomotion defect sugg…
(5) Other	760	WBGene00006407	F25H5.1a	lim-9	17.4768	4.68719	12	2.35e-07	3.9e-06	LIM domain family		lim-9 encodes a protein containing one PET domain and six LIM domains and is orthologous to Drosophila LIMPET and vertebrate FHL2; in vitro binding and yeast two-hybrid assays indicate that LIM-9 physically interacts with UNC-96 and UNC-97 and thus, is likely a component of a protein complex that links muscle focal adhesions to thick filaments; LIM-9 also enables Wnt-directed planar cell polarity…
(5) Other	761	WBGene00044301	D2062.12	lgc-28	1.87187	4.6868	7.86	1.17e-05	4.45e-05	Ligand-Gated ion Channel		none available
(5) Other	762	WBGene00020195	T03G6.3	T03G6.3	8.00064	4.68501	13.5	7.46e-08	2.41e-06	not known		T03G6.3 encodes a protein homologous to human ENPP6 (nucleotide pyrophosphatase/phosphodiesterase 6); T03G6.3 fusion proteins are expressed in body wall and vulval muscles and localize dynamically to the I-bands of bodywall muscle sarcomeres; T03G6.3 activity is required for wild-type levels of PGL-1::GFP in P granules of F1 embryos.
(5) Other	763	WBGene00004172	Y75B8A.27	pqn-92	8.04421	4.685	10	1.28e-06	9.57e-06	Prion-like-(Q/N-rich)-domain-bearing protein		The protein product of this gene is predicted to contain a glutamine/asparagine (Q/N)-rich ('prion') domain, by the algorithm of Michelitsch and Weissman (as of the WS77 release of WormBase, i.e., in wormpep77).
(5) Other	764	WBGene00043062	Y54G2A.39a	clec-80	0.745593	4.68479	3.47	0.00578	0.00884	C-type LECtin		none available
(5) Other	765	WBGene00013484	Y69H2.9	Y69H2.9	3.57832	4.68431	12.9	1.15e-07	2.87e-06	not known		none available
(5) Other	767	WBGene00017671	F21F3.1	pgal-1	10.244	4.67829	14.6	3.31e-08	1.98e-06	PeptidylGlycine alpha-Amidating Lyase		none available
(5) Other	768	WBGene00007261	C02C6.3a	lron-3	8.79689	4.67807	18.7	2.83e-09	1.32e-06	eLRR (extracellular Leucine-Rich Repeat) ONly		none available
(5) Other	769	WBGene00021487	Y40B10A.2	comt-3	6.67677	4.67634	8.55	5.47e-06	2.56e-05	Catechol-O-MethylTransferase family		none available
(5) Other	770	WBGene00006984	F54D7.4	zig-7	8.53056	4.67486	10.5	7.95e-07	7.17e-06	2 (Zwei) IG domain protein		zig-7 encodes a predicted secreted protein that is a member of the immunoglobulin superfamily of proteins; loss of zig-7 activity via RNAi has been reported to result in aldicarb resistance; a zig-7::gfp reporter fusion is expressed in body wall muscle.
(5) Other	771	WBGene00016327	C32E12.1	C32E12.1	0.226636	4.67486	2.56	0.0277	0.0369	not known		none available
(5) Other	773	WBGene00001452	C36H8.3	flp-9	6.41452	4.67193	12.9	1.1e-07	2.8e-06	FMRF-Like Peptide		flp-9 encodes a predicted FMRFamide-like peptide neurotransmitter that inhibits action potentials in the pharyngeal muscle when applied to the pharynx of dissected worms and inhibits movement when injected into A. suum; expressed at highest levels prior to adulthood.
(5) Other	774	WBGene00019968	R08F11.4	R08F11.4	6.13354	4.66873	5.83	0.000149	0.000345	not known		none available
(5) Other	776	WBGene00000175	M02F4.8	aqp-7	35.6546	4.6663	11.7	2.84e-07	4.33e-06	AQuaPorin or aquaglyceroporin related		aqp-7 encodes an aquaglyceroporin whose expression in Xenopus oocytes increases either water or glycerol permeability five- to seven-fold; AQP-7 has no function in mass RNAi assays, perhaps reflecting genetic redundancy with its several paralogs; AQP-7 is expressed in muscle punctae (perhaps focal adhesions).
(5) Other	777	WBGene00007480	C09F9.3a	glna-1	3.93586	4.66597	9.75	1.63e-06	1.13e-05	GLutamiNAse		none available
(5) Other	778	WBGene00020579	T19D12.4a	T19D12.4	16.7327	4.66528	5.34	0.000299	0.000628	not known		none available
(5) Other	779	WBGene00008139	C47D12.5	C47D12.5	6.24262	4.6652	13.7	6.15e-08	2.36e-06	not known		none available
(5) Other	780	WBGene00007304	C04G2.1a	ttr-39	0.529831	4.66001	5.04	0.000469	0.000934	TransThyretin-Related family domain		none available
(5) Other	781	WBGene00021702	Y48G9A.9a	Y48G9A.9	7.42864	4.65793	11.8	2.57e-07	4.09e-06	not known		none available
(5) Other	782	WBGene00017322	F09G8.8	clec-160	11.2293	4.65716	6.46	6.41e-05	0.000171	C-type LECtin		none available
(5) Other	783	WBGene00009595	F40F12.7	F40F12.7	9.12991	4.65707	8.51	5.74e-06	2.65e-05	not known		none available
(5) Other	784	WBGene00008304	C54D10.10	C54D10.10	0.19863	4.65634	4.34	0.00137	0.00242	not known		none available
(5) Other	786	WBGene00019738	M02F4.7	clec-265	7.02029	4.64809	7.69	1.41e-05	5.12e-05	C-type LECtin		none available
(5) Other	787	WBGene00004135	K07D4.8	pqn-48	3.44226	4.64037	12.9	1.09e-07	2.79e-06	Prion-like-(Q/N-rich)-domain-bearing protein		The protein product of this gene is predicted to contain a glutamine/asparagine (Q/N)-rich ('prion') domain, by the algorithm of Michelitsch and Weissman (as of the WS77 release of WormBase, i.e., in wormpep77).
(5) Other	788	WBGene00020576	T19D12.1	T19D12.1	9.56195	4.63722	11.5	3.42e-07	4.76e-06	not known		none available
(5) Other	789	WBGene00012759	Y41C4A.13	sup-1	6.38375	4.63718	14.7	3.23e-08	1.98e-06	SUPpressor		sup-1 encodes a novel, single-pass transmembrane protein; sup-1 was identified as an allele-specific dominant suppressor of unc-17(e245); unc-17 encodes a synaptic vesicle acetylcholine transporter and the e245 missense mutation results in substitution of arginine for glycine in the ninth transmembrane domain and reduced levels of UNC-17 protein; sup-1 is defined by several alleles that all behav…
(5) Other	790	WBGene00018146	F37C4.6a	F37C4.6	9.89294	4.63509	15.9	1.45e-08	1.64e-06	not known		none available
(5) Other	791	WBGene00015780	C14F11.4a	C14F11.4	8.37662	4.63426	12.1	2.08e-07	3.61e-06	not known		none available
(5) Other	792	WBGene00021321	Y34B4A.5	Y34B4A.5	4.42658	4.63423	14.6	3.4e-08	1.98e-06	not known		none available
(5) Other	793	WBGene00021039	W05F2.7	W05F2.7	2.29858	4.63379	7.65	1.48e-05	5.32e-05	not known		none available
(5) Other	794	WBGene00013898	ZC443.3	ZC443.3	6.095	4.63054	10.3	9.29e-07	7.95e-06	not known		none available
(5) Other	795	WBGene00019489	K07E1.1	K07E1.1	7.07066	4.63044	9.43	2.22e-06	1.37e-05	not known		none available
(5) Other	796	WBGene00020082	R57.1a	gcp-2.1	32.0383	4.63018	15.4	1.93e-08	1.72e-06	see cpr	glutamate carboxypeptidase	none available
(5) Other	800	WBGene00019273	H43E16.1	H43E16.1	3.82656	4.62215	5.07	0.000445	0.000892	not known		none available
(5) Other	801	WBGene00012364	W09D12.1	W09D12.1	12.5873	4.61787	13.5	7.04e-08	2.41e-06	not known		none available
(5) Other	802	WBGene00000998	K07E12.1a	dig-1	46.3896	4.6172	10.7	6.81e-07	6.65e-06	DIsplaced Gonad		dig-1 encodes a giant member of the immunoglobulin superfamily; dig-1 functions cell non-autonomously to mediate axon fasciculation and maintenance of cell body position within ganglia; dig-1 is also required for proper placement of the gonad; dig-1 is initially expressed in the developing embryonic gut and then expressed by a number of different muscle cells, including the body wall, head, vulva…
(5) Other	803	WBGene00010424	H36L18.2	H36L18.2	10.8625	4.61638	9.98	1.31e-06	9.71e-06	not known		none available
(5) Other	804	WBGene00004890	D1037.2	smp-2	8.24415	4.6156	11.4	3.67e-07	4.95e-06	SeMaPhorin related		none available
(5) Other	805	WBGene00009091	F23D12.7	F23D12.7	3.48286	4.61339	10.9	5.59e-07	6.05e-06	not known		none available
(5) Other	806	WBGene00012598	Y38E10A.20	Y38E10A.20	0.347071	4.61234	10.9	5.5e-07	6.02e-06	not known		none available
(5) Other	809	WBGene00015560	C07A12.2	C07A12.2	0.155953	4.61069	2.77	0.0194	0.0266	not known		none available
(5) Other	813	WBGene00021020	W04B5.3a	W04B5.3	23.4209	4.60671	10.8	6.32e-07	6.41e-06	not known		none available
(5) Other	814	WBGene00021909	Y55B1BL.1a	Y55B1BL.1	6.02945	4.60488	11.2	4.29e-07	5.33e-06	not known		none available
(5) Other	815	WBGene00003756	F33A8.2	nlp-18	2.51796	4.60459	12.4	1.6e-07	3.29e-06	Neuropeptide-Like Protein		nlp-18 encodes four predicted neuropeptide-like proteins; in C. elegans, nlp-18 is part of the FAFA neuropeptide family that also contains nlp-20; nlp-18 is expressed in a variety of neurons, including ASI, NSM, four head neurons, two tail neurons, and two anterior pharyngeal neurons; nlp-18 expression is also detected in the spermatheca, the rectal gland, and the intestine; as loss of nlp-18 act…
(5) Other	817	WBGene00044723	K11H12.11	K11H12.11	1.1546	4.60245	6.73	4.51e-05	0.000127	not known		none available
(5) Other	818	WBGene00020120	R160.3	R160.3	1.99224	4.59942	9.77	1.59e-06	1.11e-05	not known		none available
(5) Other	819	WBGene00003839	T09A12.3	ocr-2	0.243895	4.59929	5.98	0.000122	0.000293	Osm-9 and Capsaicin receptor-Related		ocr-2 encodes a TRPV (transient receptor potential channel, vanilloid subfamily) ion channel; OCR-2 activity is required for several types of sensory transduction including olfaction, osmosensation, mechanosensation, and chemosensation; an OCR-2 fusion protein is expressed in sensory cilia and requires the OSM-9 TRPV channel protein for proper localization; likewise, OSM-9 requires OCR-2 for its …
(5) Other	820	WBGene00012428	Y11D7A.3a	Y11D7A.3	15.1714	4.59889	13.5	7.1e-08	2.41e-06	not known		none available
(5) Other	821	WBGene00008993	F21A3.3	F21A3.3	4.30077	4.59874	15.5	1.81e-08	1.7e-06	not known		F21A3.3 encodes a putatively secreted protein, with an N-terminal EGF-liked domain and a DUF1794 domain, that is homologous to human THAP4/CGI-36; F21A3.3 is a paralog of MAB-7, C15F1.1, C28H8.5, C52G5.2, T28H10.2, and a domain in Y46G5A.29.
(5) Other	822	WBGene00003511	F46G10.6	mxl-3	17.7329	4.59621	10.6	7.6e-07	7.03e-06	MaX-Like		mxl-3 encodes a basic helix-loop-helix transcription factor; an mxl-3 deletion mutation, tm2580, has been reported to exhibit a slight growth delay; in vitro, MXL-3 binds E-box and/or E-box-like sequences; an mxl-3 reporter fusion is expressed in larvae and adults and seen in head muscles and neurons, part of the intestine, and body hypodermis.
(5) Other	823	WBGene00003412	F20B6.3	mrp-6	4.34621	4.59553	9.44	2.2e-06	1.36e-05	Multidrug Resistance Protein family		none available
(5) Other	824	WBGene00004096	F40F8.7	pqm-1	9.73506	4.59302	12.8	1.2e-07	2.92e-06	ParaQuat (Methylviologen) responsive		pqm-1 encodes a C2H2-type zinc finger and leucine zipper-containing protein that is upregulated in response to oxidative stress induced by paraquat treatment; PQM-1 may function as a stress-responsive transcription factor.
(5) Other	825	WBGene00007397	C07A4.2	C07A4.2	1.47349	4.59208	7.26	2.37e-05	7.66e-05	not known		none available
(5) Other	827	WBGene00016542	C39H7.4	C39H7.4	6.31978	4.57918	10.9	5.62e-07	6.05e-06	not known		none available
(5) Other	828	WBGene00015823	C16B8.3	C16B8.3	13.35	4.57837	14.7	3.18e-08	1.98e-06	not known		none available
(5) Other	829	WBGene00010772	K11D9.3	K11D9.3	5.68849	4.57835	13.1	9.89e-08	2.7e-06	not known		none available
(5) Other	830	WBGene00020260	T05E7.4	T05E7.4	0.229903	4.578	2.79	0.0187	0.0257	not known		none available
(5) Other	831	WBGene00000522	C09F12.1	clc-1	13.2298	4.57611	5.46	0.000251	0.00054	CLaudin-like in Caenorhabditis		clc-1 encodes a claudin homolog, closely similar to CLC-2, that is required for normal cohesion of apical junctions in epithelia; claudins are integral membrane proteins with four transmembrane sequences that are found in mammalian tight junctions (TJs), induce TJs when transgenically expressed in cells normally lacking them, and can mediate the specific conductance of of specific ions (e.g., mag…
(5) Other	832	WBGene00019203	H14N18.3	ttr-47	22.7728	4.57587	8.72	4.58e-06	2.27e-05	TransThyretin-Related family domain		none available
(5) Other	834	WBGene00019332	K02F3.9	K02F3.9	7.92918	4.57535	9.62	1.84e-06	1.22e-05	not known		none available
(5) Other	835	WBGene00004310	C44C11.1a	ras-1	5.02773	4.57499	15.8	1.51e-08	1.64e-06	R-RAS related		ras-1 is orthologous to the human oncogene, Related Ras Viral Oncogene Homolog 2 (RRAS2).
(5) Other	837	WBGene00021876	Y54G2A.11a	Y54G2A.11	16.1058	4.56862	12.1	2.12e-07	3.65e-06	not known		none available
(5) Other	838	WBGene00000118	Y69F12A.2a	alh-12	26.2764	4.5677	8.89	3.85e-06	2.03e-05	ALdehyde deHydrogenase		none available
(5) Other	840	WBGene00008395	D1086.8a	D1086.8	1.94076	4.56738	6.65	5.04e-05	0.00014	not known		none available
(5) Other	841	WBGene00015110	B0281.3	B0281.3	3.4904	4.56615	6.9	3.66e-05	0.000108	not known		none available
(5) Other	842	WBGene00008654	F10F2.2	F10F2.2	34.0511	4.56544	12.1	2.02e-07	3.55e-06	not known		none available
(5) Other	843	WBGene00010086	F55B11.4	F55B11.4	13.1588	4.56439	12.8	1.22e-07	2.94e-06	not known		none available
(5) Other	844	WBGene00000169	F32A5.5a	aqp-1	9.91715	4.56333	11.3	3.88e-07	5.09e-06	AQuaPorin or aquaglyceroporin related		aqp-1 encodes, by alternative splicing, two isoforms of an aquaglyceroporin required for normally short lifespan; AQP-1 expression is upregulated under daf-2(-) conditions, and loss of AQP-1 function in daf-2 mutant animals results in reduced lifespan; AQP-1 increases glycerol permeability five- to seven-fold when expressed in Xenopus oocytes; AQP-1::GFP fusion proteins are expressed predominantl…
(5) Other	845	WBGene00001852	C30G7.1	hil-1	2.15193	4.56109	8.88	3.88e-06	2.04e-05	HIstone H1 Like		none available
(5) Other	846	WBGene00008709	F11E6.6	F11E6.6	0.658818	4.55705	8.88	3.89e-06	2.04e-05	not known		none available
(5) Other	847	WBGene00018068	F35H10.2	F35H10.2	0.306343	4.55688	4.65	0.000843	0.00156	not known		none available
(5) Other	848	WBGene00008365	D1046.4	D1046.4	0.986636	4.55552	5.63	0.000198	0.00044	not known		none available
(5) Other	849	WBGene00235306	W03D2.13a	W03D2.13	2.70275	4.5515	7.56	1.66e-05	5.79e-05	not known		none available
(5) Other	850	WBGene00018702	F52E4.5	F52E4.5	3.86665	4.54895	10.3	9.98e-07	8.28e-06	not known		none available
(5) Other	851	WBGene00219316	F21A3.11	F21A3.11	9.98178	4.54774	8.26	7.44e-06	3.19e-05	not known		none available
(5) Other	852	WBGene00002146	C09B8.1	ipp-5	4.2407	4.54732	13.8	5.72e-08	2.31e-06	Inositol Polyphosphate 5-Phosphatase		ipp-5 encodes a type I inositol 5-phosphatase homolog; ipp-5 acts downstream of let-23 to negatively regulate IP3 signaling and is involved in spermathecal contractions during ovulation; an ipp-5::gfp transcriptional reporter is expressed in the adult distal spermatheca and weakly in the proximal sheath.
(5) Other	853	WBGene00016218	C29F9.3a	C29F9.3	6.32612	4.54584	9.64	1.8e-06	1.21e-05	not known		none available
(5) Other	854	WBGene00012437	Y11D7A.14	hum-9	1.09517	4.5449	10.1	1.16e-06	9.07e-06	Heavy chain, Unconventional Myosin		Y11D7A.14 encodes a putative myosin, with an N-terminal myosin head motor domain and a C-terminal coiled-coil domain; Y11D7A.14 has no obvious function in mass RNAi assays.
(5) Other	855	WBGene00004831	F08B12.3a	slo-2	3.66848	4.54171	10.9	5.9e-07	6.18e-06	SLOwpoke potassium channel family		slo-2 encodes a high conductance, sodium-activated potassium channel; when expressed in Xenopus oocytes, SLO-2 exhibits a synergistic dependence on both chloride and calcium ions for activation; expression of a dominant negative SLO-2 mutant can interfere with activity of SLO-1, a second high conductance potassium channel, suggesting that the two channels can form functional heteromultimers; a SL…
(5) Other	856	WBGene00016912	C54D1.2	clec-86	5.03052	4.54019	5.83	0.000149	0.000346	C-type LECtin		none available
(5) Other	857	WBGene00003577	F56F3.2a	ndg-4	15.2216	4.53781	12.5	1.53e-07	3.26e-06	NorDiHydroGuaiaretic acid resistant		none available
(5) Other	858	WBGene00007593	C14H10.3a	C14H10.3	11.8343	4.53774	17.7	4.92e-09	1.48e-06	not known		none available
(5) Other	859	WBGene00009023	F21G4.1	F21G4.1	2.69829	4.5365	7.92	1.09e-05	4.26e-05	not known		none available
(5) Other	860	WBGene00016866	C52B9.3a	coel-1	3.55583	4.53536	5.89	0.000137	0.000323	tubulin folding COfactor E-Like protein		coel-1 encodes, by alternative splicing, two isoforms of a putative tubulin-destabilizing protein orthologous to human TBCEL (LRRC35; OMIM:610451), and paralogous to K07H8.1 and human TBCE (OMIM:604934, mutated in HRD); coel-1(tm2136) homozygotes are viable, and COEL-1 has no obvious function in mass RNAi assays.
(5) Other	862	WBGene00022144	Y71G12B.4	pghm-1	8.13341	4.53456	16.1	1.3e-08	1.58e-06	PeptidylGlycine-alpha-Hydroxylating Monooxygenase		none available
(5) Other	863	WBGene00019882	R05D3.9	R05D3.9	15.4972	4.52868	16.6	9.26e-09	1.52e-06	not known		none available
(5) Other	864	WBGene00021518	Y41D4B.16	hpo-6	29.3696	4.52867	9.66	1.77e-06	1.19e-05	Hypersensitive to POre-forming toxin		none available
(5) Other	865	WBGene00018101	F36H5.2a	math-27	4.26368	4.52558	14.6	3.44e-08	1.98e-06	MATH (meprin-associated Traf homology) domain containing		The F36H5.2 gene encodes a protein with a meprin-associated Traf homology (MATH) domain that may be involved in apoptosis.
(5) Other	866	WBGene00018871	F55C12.4	F55C12.4	0.416942	4.52516	4.03	0.00229	0.00384	not known		none available
(5) Other	867	WBGene00012213	W02D9.7	W02D9.7	20.9219	4.52419	7.58	1.61e-05	5.65e-05	not known		none available
(5) Other	868	WBGene00019521	K08B12.2a	dmd-7	11.7159	4.52137	15	2.5e-08	1.83e-06	DM (Doublesex/MAB-3) Domain family		none available
(5) Other	869	WBGene00020846	T27A10.6	T27A10.6	4.09235	4.52098	11.9	2.43e-07	3.95e-06	not known		none available
(5) Other	870	WBGene00011831	T19B10.2	T19B10.2	18.6798	4.51834	9.89	1.43e-06	1.03e-05	not known		none available
(5) Other	872	WBGene00004234	Y53F4B.28	ptr-20	5.16644	4.51652	10.7	6.87e-07	6.66e-06	PaTched Related family		ptr-20 encodes a nematode-specific member of the sterol sensing domain (SSD) proteins, distantly paralogous to Drosophila PATCHED (PTC) and human PTCH (OMIM:601309, mutated in basal cell nevus syndrome); PTR-20 is weakly required for normal molting from L3 to adult stages male tail development; PTR-20 is also required for normal adult alae formation, growth to full size, and locomotion.
(5) Other	873	WBGene00013077	Y51A2D.9a	ttr-24	27.8207	4.51649	8.43	6.23e-06	2.8e-05	TransThyretin-Related family domain		none available
(5) Other	874	WBGene00015247	B0545.4	B0545.4	0.631626	4.51424	5.65	0.000191	0.000428	not known		none available
(5) Other	875	WBGene00019619	K10C2.3	asp-14	22.2125	4.51169	6.29	8.01e-05	0.000206	ASpartyl Protease		asp-14 encodes an aspartyl protease.
(5) Other	876	WBGene00010522	K03A11.5	K03A11.5	1.81174	4.51046	7.08	2.95e-05	9.11e-05	not known		none available
(5) Other	877	WBGene00020577	T19D12.2a	T19D12.2	4.47251	4.50986	14.5	3.53e-08	2.01e-06	not known		none available
(5) Other	878	WBGene00011870	T20G5.8	T20G5.8	3.58566	4.5088	9.59	1.9e-06	1.25e-05	not known		none available
(5) Other	879	WBGene00007336	C05C12.4	C05C12.4	9.4153	4.5072	13.5	7.3e-08	2.41e-06	not known		none available
(5) Other	880	WBGene00021036	W05F2.4a	W05F2.4	12.2769	4.50674	12.6	1.4e-07	3.11e-06	not known		none available
(5) Other	881	WBGene00011102	R07E3.1a	R07E3.1	20.9659	4.50498	13.7	6.22e-08	2.37e-06	not known		none available
(5) Other	883	WBGene00006999	F42G4.3a	zyx-1	43.3346	4.50229	9.82	1.53e-06	1.08e-05	ZYXin		zyx-1 encodes a LIM domain protein and is most similar to vertebrate Zyxin; the vertebrate zyxin sub-family also includes migfilin, TRIP6 and LPP; the ZYX-1 protein is expressed in striated body wall muscle and localizes at dense bodies/Z-discs and in the nucleus; ZYX-1 physically interacts with P granule components (GLH proteins) and several dense body and M-line proteins, including DEB-1 (Vincu…
(5) Other	884	WBGene00020917	W01B11.6a	W01B11.6	10.0762	4.4979	9.69	1.72e-06	1.17e-05	not known		none available
(5) Other	885	WBGene00016018	C23H3.2a	C23H3.2	17.4938	4.49653	15	2.6e-08	1.85e-06	not known		none available
(5) Other	887	WBGene00006609	W05E10.4a	tre-3	11.1486	4.49456	10.6	7.35e-07	6.92e-06	TREhalase		tre-3 encodes one of four putative trehalases in C. elegans; tre-3 is expressed throughout development.
(5) Other	888	WBGene00022072	Y67D8C.8	cpg-9	17.7318	4.48987	5.27	0.000331	0.000687	Chondroitin ProteoGlycan		cpg-9 encodes a small (69-residue), putatively secreted protein with 4 potential chondroitin attachment sites, 2 of them verified by mass spectrometry; CPG-9 has no obvious function in mass RNAi assays.
(5) Other	889	WBGene00013515	Y73F4A.2	Y73F4A.2	3.05211	4.48827	6.9	3.65e-05	0.000108	not known		none available
(5) Other	890	WBGene00002272	C16H3.2	lec-9	33.9346	4.48502	11.2	4.48e-07	5.47e-06	gaLECtin		lec-9 encodes a predicted lectin that affects embryonic viability.
(5) Other	892	WBGene00022546	ZC196.2	ZC196.2	0.463447	4.47898	5.59	0.000209	0.000461	not known		none available
(5) Other	893	WBGene00009562	F39H2.1	flp-22	4.71601	4.47889	10.9	5.66e-07	6.06e-06	FMRF-Like Peptide		none available
(5) Other	894	WBGene00017529	F16G10.15	F16G10.15	0.282626	4.47535	2.6	0.0261	0.035	not known		none available
(5) Other	896	WBGene00020884	T28B4.1a	T28B4.1	3.42067	4.47146	12.2	1.93e-07	3.47e-06	not known		This gene encodes a protein containing an F-box, a motif predicted to mediate protein-protein interactions either with homologs of yeast Skp-1p or with other proteins.
(5) Other	897	WBGene00014148	ZK909.3	ZK909.3	5.84798	4.47102	13.9	5.52e-08	2.31e-06	not known		none available
(5) Other	899	WBGene00015464	C05C8.7	C05C8.7	13.2338	4.47047	12.4	1.62e-07	3.29e-06	not known		none available
(5) Other	900	WBGene00018473	F45E4.11	cima-1	3.16478	4.47032	15.5	1.89e-08	1.7e-06	CIrcuit MAintenance abnormal		cima-1 encodes a membrane solute transporter that is a member of the SLC17 family of transporters; CIMA-1 functions postembryonially in epidermal cells to maintain synaptic contacts established during embryogenesis; specifically, CIMA-1 negatively regulates levels of the EGL-15(5A)/FGF receptor isoform to correctly position glia and control epidermal-glia cell adhesion; cima-1 expression begins d…
(5) Other	901	WBGene00044605	F22A3.7	ttr-36	9.07962	4.46451	11.4	3.6e-07	4.89e-06	TransThyretin-Related family domain		none available
(5) Other	902	WBGene00007689	C18E9.9	C18E9.9	9.51	4.46275	14.2	4.43e-08	2.17e-06	not known		none available
(5) Other	903	WBGene00015956	C18B2.5a	C18B2.5	23.2095	4.4597	15.1	2.35e-08	1.8e-06	not known		none available
(5) Other	904	WBGene00008548	F07A11.5	F07A11.5	8.01493	4.45764	7.47	1.84e-05	6.3e-05	not known		none available
(5) Other	905	WBGene00015713	C12D12.1a	C12D12.1	54.6582	4.45688	10.7	7.02e-07	6.75e-06	not known		none available
(5) Other	906	WBGene00002054	F10C1.7a	ifb-2	27.6627	4.45674	10.6	7.1e-07	6.76e-06	Intermediate Filament, B		ifb-2 encodes an intermediate filament protein; IFB-2 is expressed exclusively in the intestine and functions as a structural component of the intestinal terminal web; within the terminal web, IFB-2 localizes to a discrete substructure known as the endotube.
(5) Other	907	WBGene00019068	F58H7.2	faah-3	13.5694	4.45006	12.7	1.32e-07	2.98e-06	Fatty Acid Amide Hydrolase homolog		none available
(5) Other	908	WBGene00020301	T07D1.2	T07D1.2	8.25873	4.44988	13.6	6.55e-08	2.38e-06	not known		none available
(5) Other	910	WBGene00004238	F46G10.5a	ptr-24	14.5093	4.44675	11.6	3.23e-07	4.65e-06	PaTched Related family		ptr-24 encodes a nematode-specific member of the sterol sensing domain (SSD) proteins, distantly paralogous to Drosophila PATCHED (PTC) and human PTCH (OMIM:601309, mutated in basal cell nevus syndrome); PTR-24 has no known function in vivo.
(5) Other	911	WBGene00007898	C33D9.3a	C33D9.3	2.6401	4.44573	7.12	2.8e-05	8.74e-05	not known		none available
(5) Other	912	WBGene00013514	Y73F4A.1	Y73F4A.1	4.90134	4.44307	5.6	0.000205	0.000454	not known		none available
(5) Other	913	WBGene00021128	W10C8.5	W10C8.5	13.3543	4.44111	13.5	7.36e-08	2.41e-06	not known		none available
(5) Other	914	WBGene00008284	C53D6.7	C53D6.7	5.81273	4.43992	13.8	5.98e-08	2.33e-06	not known		none available
(5) Other	915	WBGene00022736	ZK418.7	ZK418.7	1.9799	4.4394	6.51	6e-05	0.000161	not known		none available
(5) Other	916	WBGene00008633	F10A3.3	fbxa-18	0.14371	4.43855	2.86	0.0166	0.0231	F-box A protein		This gene encodes a protein containing an F-box, a motif predicted to mediate protein-protein interactions either with homologs of yeast Skp-1p or with other proteins.
(5) Other	917	WBGene00018350	F42C5.10	ttm-4	13.4439	4.43593	13.8	5.92e-08	2.31e-06	Intermediate Filament Organize		none available
(5) Other	918	WBGene00019977	R09B5.4	fpn-1.2	1.13724	4.43549	4.96	0.000526	0.00103	FerroPortiN		R09B5.4 is orthologous to the human gene HYPOTHETICAL PROTEIN (SLC11A3; OMIM:604653), which when mutated leads to disease.
(5) Other	919	WBGene00021253	Y22D7AL.15	Y22D7AL.15	7.0962	4.43538	5.81	0.000155	0.000356	not known		none available
(5) Other	920	WBGene00015857	C16D9.1	C16D9.1	0.197527	4.43403	2.51	0.0302	0.04	not known		none available
(5) Other	921	WBGene00003747	E03D2.2a	nlp-9	3.46224	4.43365	14.8	3e-08	1.95e-06	Neuropeptide-Like Protein		none available
(5) Other	922	WBGene00002976	T07H6.5	lev-9	0.367864	4.43162	3.92	0.0027	0.00446	LEVamisole resistant		lev-9 encodes a novel extracellular protein; lev-9 was identified in screens for mutants that are resistant to the anthelmintic levamisole; lev-9 mutations result in weak levamisole resistance with respect to locomotion, but strong resistance with respect to egg laying.
(5) Other	923	WBGene00004061	T02D1.5	pmp-4	6.25711	4.43082	6.42	6.77e-05	0.000179	Peroxisomal Membrane Protein related		The pmp-4 gene encodes a homolog of human ALD, which when mutated leads to X-linked adrenoleukodystrophy (OMIM:300100).
(5) Other	924	WBGene00014000	ZK550.6	ZK550.6	22.9118	4.4306	6.94	3.48e-05	0.000104	not known		The ZK550.6 gene encodes an ortholog of the human gene PHYTANOYL-COA HYDROXYLASE (PHYH; PAHX; OMIM:602026), which when mutated leads to Refsum disease (OMIM:266500).
(5) Other	925	WBGene00016349	C33E10.8	C33E10.8	0.178346	4.42857	3.14	0.0102	0.0148	not known		This gene encodes a protein containing an F-box, a motif predicted to mediate protein-protein interactions either with homologs of yeast Skp-1p or with other proteins.
(5) Other	926	WBGene00013884	ZC412.3	ZC412.3	8.81811	4.4283	10.8	6.27e-07	6.38e-06	not known		none available
(5) Other	927	WBGene00044686	W07E11.4	flp-28	7.42092	4.42737	16.8	8.38e-09	1.52e-06	FMRF-Like Peptide		none available
(5) Other	928	WBGene00022389	Y95B8A.10a	pde-6	12.5014	4.42577	17.1	6.91e-09	1.52e-06	PhosphoDiEsterase		pde-6 encodes a 3'-5'-cAMP phosphodiesterase most similar to the mammalian PDE8 family of enzymes; in C. elegans, PDE-6 activity is required for negative regulation of oocyte maturation.
(5) Other	929	WBGene00010943	M176.4	M176.4	8.54359	4.42406	9.27	2.61e-06	1.55e-05	not known		none available
(5) Other	930	WBGene00044471	F56D6.9	F56D6.9	1.34953	4.41837	5.17	0.000385	0.000786	not known		none available
(5) Other	931	WBGene00003463	ZK1251.6	msp-76	0.286405	4.41773	2.45	0.0339	0.0444	Major Sperm Protein		msp-76 encodes a protein that belongs to a family of proteins called the Major Sperm Proteins (MSPs) that is conserved in nematodes; this family consists of closely related, small, basic proteins that make up 15% of sperm protein; this multigene family consists of over fifty genes, including many pseudogenes; MSPs are involved in both extracellular signaling and cytoskeletal functions during repr…
(5) Other	932	WBGene00016505	C37C3.13	ttr-33	3.69692	4.41522	5.73	0.000173	0.000391	TransThyretin-Related family domain		none available
(5) Other	933	WBGene00003015	W03C9.4a	lin-29	1.45316	4.41404	3.91	0.00277	0.00458	abnormal cell LINeage		lin-29 encodes a zinc finger transcription factor of the C2H2 type that affects the heterochronic development of the vulva, egg laying system, male gonad, cuticle, and the molting cycle; expressed in uterine and vulval muscle cells, seam cells, pharynx, head neurons, ventral cord neurons, preanal ganglion, distal tip cells, anchor cell, vulval cells, male-specific linker cell, and cells in the ta…
(5) Other	934	WBGene00018874	F55C12.7	tag-234	3.35104	4.41251	9.05	3.26e-06	1.81e-05	Temporarily Assigned Gene name		none available
(5) Other	935	WBGene00021275	Y23H5B.4	dmsr-2	1.33071	4.41215	6.08	0.000106	0.000261	DroMyoSuppressin Receptor related		none available
(5) Other	937	WBGene00021161	Y4C6B.7a	Y4C6B.7	6.95721	4.40775	10.6	7.72e-07	7.06e-06	not known		none available
(5) Other	939	WBGene00019572	K09E2.3	K09E2.3	11.7723	4.40748	10.9	5.79e-07	6.14e-06	not known		none available
(5) Other	940	WBGene00021215	Y18H1A.11a	Y18H1A.11	0.483369	4.40713	5.48	0.000243	0.000526	not known		none available
(5) Other	942	WBGene00003522	K06A4.1	nas-3	1.39832	4.40523	4.35	0.00136	0.00241	Nematode AStacin protease		nas-3 encodes an astacin-like metalloprotease.
(5) Other	943	WBGene00015116	B0286.3	B0286.3	14.0086	4.40384	14.8	2.89e-08	1.94e-06	not known		none available
(5) Other	944	WBGene00016264	C30F12.5a	C30F12.5	6.01355	4.40156	14.8	3e-08	1.95e-06	not known		none available
(5) Other	945	WBGene00009635	F42F12.3	F42F12.3	7.11313	4.39894	12.5	1.54e-07	3.26e-06	not known		none available
(5) Other	946	WBGene00009642	F42G4.5a	F42G4.5	3.0983	4.3984	8.9	3.78e-06	2.02e-05	not known		none available
(5) Other	947	WBGene00002011	C14B9.1	hsp-12.2	5.51211	4.39832	11.6	3.02e-07	4.46e-06	Heat Shock Protein		hsp-12.2 encodes a small heat-shock protein that forms heterotetramers with HSP-12.3 and has no chaperone-like activity; structurally, HSP-12.2 is mostly a beta-sheet; at least one HSP-12 (which may or may not be HSP-12.2) is ubiquitously expressed in L1 larvae, and later expressed in adult spermatids (and perhaps spermatocytes), and some adult vulval cells.
(5) Other	948	WBGene00007176	B0399.1a	kcnl-1	1.76	4.39721	5.68	0.000183	0.000413	KCNN (potassium K ChaNNel, calcium activated)-Like		kcnl-1 encodes a small-conductance calcium-activated potassium channel subunit.
(5) Other	950	WBGene00001650	F25H8.3a	gon-1	9.57343	4.3886	14.8	2.87e-08	1.94e-06	abnormal GONad development		gon-1 encodes a functional metalloprotease that defines a new sub-family of secreted proteases known as MPT (metalloprotease with thrombospondin type 1 repeats); the other two members of this family are the bovine procollagen I N-protease ( PINP ) and the murine enzyme ADAMTS-1; gon-1 is essential for hermaphrodite gonadal morphogenesis and sequence homology with other metalloproteases suggests t…
(5) Other	951	WBGene00086569	F38A6.5	F38A6.5	1.18835	4.38597	4.12	0.00195	0.00332	not known		none available
(5) Other	952	WBGene00011392	T03D8.3	sbt-1	11.8906	4.38193	12.1	2.16e-07	3.69e-06	Seven B Two (mammalian 7BT prohormone convertase chaperone) homolog		sbt-1 encodes the C. elegans ortholog of the neuroendocrine chaperone 7B2; by homology, SBT-1 is predicted to function in the maturation/activation of the EGL-3/PC2 proprotein convertase; accordingly, mass spectrometry analysis indicates that sbt-1 activity is required for production of some neuropeptides; sbt-1 mutant animals are also aldicarb resistant, suggesting that SBT-1 is required for nor…
(5) Other	953	WBGene00003248	F57B7.4	mig-17	2.78167	4.3817	8.57	5.38e-06	2.53e-05	abnormal cell MIGration		mig-17 encodes a secreted metalloprotease that is a member of the ADAM (A Disintegrin And Metalloprotease) protein family; MIG-17 activity is required for proper migration of gonadal leader cells, namely the hermaphrodite distal tip cells (DTCs) and the male linker cell (MLC); a MIG-17::GFP translational fusion protein is first detected in late embryos with expression continuing through adulthood…
(5) Other	955	WBGene00014958	Y105C5A.2	Y105C5A.2	0.269315	4.37878	8.39	6.53e-06	2.89e-05	not known		none available
(5) Other	956	WBGene00044527	Y39H10B.2a	Y39H10B.2	7.87709	4.37782	7.89	1.13e-05	4.34e-05	not known		none available
(5) Other	957	WBGene00003957	F23B2.12	pcp-2	9.5262	4.37772	9.9	1.4e-06	1.02e-05	Prolyl Carboxy Peptidase like		pcp-2 encodes a prolyl carboxypeptidase.
(5) Other	958	WBGene00019772	M04G7.1	M04G7.1	1.09465	4.37386	6.45	6.54e-05	0.000174	not known		none available
(5) Other	959	WBGene00045275	F18E3.12	F18E3.12	6.63852	4.37382	8.43	6.19e-06	2.79e-05	not known		none available
(5) Other	960	WBGene00001457	Y37D8A.15	flp-14	5.24936	4.3729	15.5	1.81e-08	1.7e-06	FMRF-Like Peptide		flp-14 encodes four copies of a single FMRFamide-related short peptide neurotransmitter; FLP-14 can increase pharyngeal action potential frequency, although its exact role in C. elegans neurotransmission is not yet clear.
(5) Other	961	WBGene00001454	K02G10.4a	flp-11	3.6031	4.37244	9.99	1.3e-06	9.65e-06	FMRF-Like Peptide		none available
(5) Other	962	WBGene00013895	ZC434.9a	ZC434.9	6.10962	4.37062	11.7	2.87e-07	4.36e-06	not known		none available
(5) Other	963	WBGene00007749	C26E1.3	ceh-79	2.22841	4.36772	11.1	4.63e-07	5.53e-06	C. Elegans Homeobox		none available
(5) Other	964	WBGene00015551	C06G3.5a	C06G3.5	16.4546	4.36761	14.3	4.04e-08	2.09e-06	not known		C06G3.5 is orthologous to human ADENOSINE DEAMINASE (ADA; OMIM:102700), which when mutated leads to severe combined immunodeficiency.
(5) Other	966	WBGene00019300	K02D7.5	swt-1	5.28823	4.36605	7.44	1.9e-05	6.45e-05	SWEET sugar transporter family		none available
(5) Other	968	WBGene00018869	F55C12.1a	F55C12.1	14.7659	4.36501	13.8	5.77e-08	2.31e-06	not known		none available
(5) Other	969	WBGene00007153	B0365.6	clec-41	107.114	4.36379	4.83	0.000639	0.00123	C-type LECtin		none available
(5) Other	970	WBGene00017907	F28F9.3	F28F9.3	0.14199	4.36333	2.56	0.028	0.0373	not known		none available
(5) Other	971	WBGene00007495	C09G9.5a	C09G9.5	0.178346	4.36124	3.05	0.012	0.0172	not known		none available
(5) Other	972	WBGene00000225	C38C6.2a	atgp-2	6.76298	4.36072	15.4	1.99e-08	1.73e-06	Amino acid Transporter GlycoProtein subunit		atgp-2 encodes an amino acid transporter glycoprotein subunit; when co-expressed in Xenopus oocytes with either the AAT-1 or AAT-3 catalytic subunit, ATGP-2 facilitates amino acid uptake and exchange, showing a relatively high affinity for small and some large neutral amino acids; when co-expressed with AAT-9, ATGP-2 is able to enhance the activity of this catalytic subunit; ATGP-2 can covalently…
(5) Other	973	WBGene00003443	C34F11.4	msp-50	0.303493	4.35981	3.62	0.00446	0.00701	Major Sperm Protein		msp-50 encodes a protein that belongs to a family of proteins called the Major Sperm Proteins (MSPs) that is conserved in nematodes; this family consists of closely related, small, basic proteins that make up 15% of sperm protein; this multigene family consists of over fifty genes, including many pseudogenes; MSPs are involved in both extracellular signaling and cytoskeletal functions during repr…
(5) Other	974	WBGene00018353	F42G2.4	fbxa-182	5.61352	4.35833	7.15	2.69e-05	8.47e-05	F-box A protein		This gene encodes a protein containing an F-box, a motif predicted to mediate protein-protein interactions either with homologs of yeast Skp-1p or with other proteins; this gene's encoded protein also contains an FTH/DUF38 motif, which may also mediate protein-protein interaction.
(5) Other	975	WBGene00017948	F31D5.5	mth-1	7.23722	4.35593	8.96	3.56e-06	1.93e-05	MeTHuselah (Drosophila aging-associated GPCR) homolog		none available
(5) Other	976	WBGene00012184	W01F3.1a	mnr-1	12.1088	4.355	13.7	6.42e-08	2.38e-06	MeNoRin (dendritic branching protein)		none available
(5) Other	977	WBGene00020363	T08E11.7	fbxa-3	0.276321	4.35384	4.35	0.00136	0.0024	F-box A protein		This gene encodes a protein containing an F-box, a motif predicted to mediate protein-protein interactions either with homologs of yeast Skp-1p or with other proteins; this gene's encoded protein also contains an FTH/DUF38 motif, which may also mediate protein-protein interaction.
(5) Other	978	WBGene00016360	C33G8.2	C33G8.2	2.08058	4.35359	10.5	8.2e-07	7.3e-06	not known		none available
(5) Other	979	WBGene00008610	F09C3.2	F09C3.2	3.17986	4.35344	8.41	6.36e-06	2.85e-05	not known		none available
(5) Other	980	WBGene00017592	F19C7.2	F19C7.2	2.72878	4.35171	4.48	0.0011	0.00198	not known		none available
(5) Other	982	WBGene00020786	T25B2.2a	T25B2.2	3.80652	4.34859	10.4	9.11e-07	7.86e-06	not known		none available
(5) Other	983	WBGene00013859	ZC247.1	ZC247.1	10.8869	4.3478	16.7	8.61e-09	1.52e-06	not known		none available
(5) Other	984	WBGene00017621	F20A1.10	F20A1.10	8.40485	4.34656	11.6	3.25e-07	4.65e-06	not known		none available
(5) Other	985	WBGene00011522	T06D8.1a	srap-1	26.7571	4.34577	6.72	4.61e-05	0.00013	Serine Rich Adhesion Protein-like		none available
(5) Other	986	WBGene00014207	ZK1058.9a	ZK1058.9	16.6821	4.34552	10.7	6.54e-07	6.51e-06	not known		none available
(5) Other	987	WBGene00007460	C08F11.13a	C08F11.13	11.1842	4.34267	13.5	7.05e-08	2.41e-06	not known		none available
(5) Other	988	WBGene00000176	K02G10.7a	aqp-8	15.1448	4.34137	4.66	0.000828	0.00154	AQuaPorin or aquaglyceroporin related		aqp-8 encodes, by alternative splicing, two isoforms of a putative aquaglyceroporin with no known substrate, since AQP-8 expressed in Xenopus oocytes has no effect on water, glycerol, or urea permeability; loss of AQP-8 activity via mutation or RNAi results in no obvious defects; however, AQP-8, in conjunction with AQP-2, AQP-3, and AQP-4, is weakly required for recovery from hypotonic stress; AQ…
(5) Other	989	WBGene00016892	C53A3.2	C53A3.2	5.17237	4.34136	5.51	0.000235	0.00051	not known		none available
(5) Other	990	WBGene00006470	F40F9.2	tag-120	6.90539	4.34114	10.2	1.06e-06	8.58e-06	Temporarily Assigned Gene name		tag-120 encodes a predicted transmembrane protein; as loss of tag-120 activity via RNAi does not result in any abnormalities, the precise role of TAG-120 in C. elegans development and/or behavior is not yet known; however, TAG-120 is homologous to a Drosophila NMDA receptor-associated protein and mammalian transmembrane proteins that function in Fas-mediated cell death, so TAG-120 may play a role…
(5) Other	991	WBGene00017850	F27B10.1	F27B10.1	0.466476	4.3405	10.2	1.06e-06	8.61e-06	not known		none available
(5) Other	992	WBGene00017168	F01F1.14	F01F1.14	0.274399	4.3403	4.77	0.000699	0.00133	not known		none available
(5) Other	993	WBGene00015158	B0361.4	B0361.4	0.266809	4.33989	5.25	0.000341	0.000705	not known		none available
(5) Other	994	WBGene00014141	ZK899.2	ZK899.2	18.5378	4.3396	14.6	3.4e-08	1.98e-06	not known		none available
(5) Other	995	WBGene00010491	K02B7.3a	K02B7.3	7.70463	4.33944	10.9	5.89e-07	6.18e-06	not known		none available
(5) Other	996	WBGene00001703	T01B10.2	grd-14	4.91538	4.33926	7.41	1.98e-05	6.66e-05	GRounDhog (hedgehog-like family)		grd-14 encodes a hedgehog-like protein, with an N-terminal signal sequence and a C-terminal Ground domain; the Ground domain is predicted to form a cysteine-crosslinked protein involved in intercellular signalling, and it has subtle similarity to the N-terminal Hedge domain of HEDGEHOG proteins; GRD-14 is required for normal growth to full size, locomotion, and vulval morphogenesis; all of these …
(5) Other	997	WBGene00004124	F40F4.8	pqn-37	1.7666	4.3373	9.68	1.74e-06	1.18e-05	Prion-like-(Q/N-rich)-domain-bearing protein		The protein product of this gene is predicted to contain a glutamine/asparagine (Q/N)-rich ('prion') domain, by the algorithm of Michelitsch and Weissman (as of the WS77 release of WormBase, i.e., in wormpep77).
(5) Other	998	WBGene00013541	Y75B8A.4	Y75B8A.4	8.36311	4.33629	9.48	2.11e-06	1.33e-05	not known		none available
(5) Other	999	WBGene00003991	K03E6.6	pfn-3	8.59833	4.33625	10.9	5.82e-07	6.15e-06	ProFiliN		none available
(5) Other	1000	WBGene00012728	Y39G8B.9	Y39G8B.9	1.16922	4.33577	3.11	0.0108	0.0157	not known		none available
(5) Other	1002	WBGene00004311	F17C8.4	ras-2	10.4641	4.33489	11.5	3.35e-07	4.73e-06	R-RAS related		ras-2 encodes member of the Ras subfamily of RAS small GTPases with highest similarity to human M-Ras
(5) Other	1003	WBGene00018718	F52H2.6	F52H2.6	7.9986	4.33316	11.3	3.9e-07	5.11e-06	not known		F52H2.6 is orthologous to the human gene 3BETA-HYDROXYSTEROL DELTA 24 REDUCTASE (DHCR24; OMIM:606418), which when mutated leads to disease.
(5) Other	1004	WBGene00008199	C49C3.9	C49C3.9	11.5837	4.3328	3.62	0.00446	0.00701	not known		none available
(5) Other	1005	WBGene00008594	F08H9.6	clec-57	1.81841	4.33246	4.76	0.000709	0.00134	C-type LECtin		none available
(5) Other	1006	WBGene00044191	F43D2.6	F43D2.6	7.07238	4.32887	13.6	6.94e-08	2.41e-06	not known		none available
(5) Other	1007	WBGene00006452	R148.6	heh-1	41.8387	4.32858	6.88	3.74e-05	0.00011	HE1 homologue		tag-79/R148.6 is orthologous to human NPC2 (OMIM:601015, mutated in Niemann-Pick disease type C2)
(5) Other	1008	WBGene00020649	T21D12.9a	sma-10	6.20301	4.32858	11.1	4.92e-07	5.77e-06	SMAll		sma-10 encodes a protein containing leucine rich-repeats and immunoglobulin-like domains that is a member of the LRIG family of transmembrane proteins; sma-10 functions to regulate the TGFbeta signaling pathway that controls body size; consistent with genetic epistasis analysis suggesting that SMA-10 acts between the DBL-1/TGFbeta ligand and the SMA-6/TGFbeta receptor in the SMA-6/DAF-4 signaling…
(5) Other	1009	WBGene00019666	K12B6.1	sago-1	18.1019	4.32778	14.7	3.2e-08	1.98e-06	Synthetic secondary siRNA-deficient ArGOnaute mutant		sago-1 encodes an Argonaute homolog that is partially required for the amplification phase of RNAi responses; a multiply mutant strain (MAGO), consisting of ppw-1(tm914), sago-1(tm1195), sago-2(tm894), F58G1.1(tm1019), C06A1.4(tm887), and M03D4.6(tm1144) alleles, is completely resistant to both germline and somatic RNAi; sago-1 is genetically redundant with ppw-1 and sago-2, with any one of these…
(5) Other	1010	WBGene00020158	T02C5.1a	T02C5.1	48.089	4.32754	11.5	3.38e-07	4.74e-06	not known		The T02C5.1 gene encodes a protein that may be involved in apoptosis; it has some similarity to the tumor necrosis factor (TNF) receptor of vertebrates.
(5) Other	1011	WBGene00015061	B0228.4a	cpna-2	39.0682	4.32669	9.94	1.36e-06	9.91e-06	CoPiNe domain protein, Atypical		cpna-2 encodes proteins with similarity to several InterPro domains including those of polycystin cation channels, von Willebrand factor, the DNA recombination repair protein BRCA2, protein-tyrosine phosphatase, non-receptor type-13, glyoxylate carboligase, and copines, Ca2+-dependent phosphatidylserine binding proteins; cpna-2::gfp reporter fusions are expressed in body wall muscle.
(5) Other	1012	WBGene00012138	T28F4.3	T28F4.3	0.3844	4.32668	4.34	0.00138	0.00244	not known		none available
(5) Other	1013	WBGene00022010	Y59H11AR.2a	catp-7	22.4675	4.32284	13.2	9.22e-08	2.67e-06	Cation transporting ATPase		none available
(5) Other	1015	WBGene00044672	F42G2.8	fbxa-4	0.912344	4.32232	6.19	9.17e-05	0.000231	F-box A protein		none available
(5) Other	1016	WBGene00012891	Y45F10D.13a	sorb-1	2.97801	4.32063	8.26	7.47e-06	3.2e-05	SORBin homolog		none available
(5) Other	1017	WBGene00019347	K02H8.1a	mbl-1	7.47013	4.3202	8.12	8.72e-06	3.59e-05	MBL (muscleblind) splicing regulator homolog		mbl-1 encodes, by alternative splicing, two isoforms of a putative MUSCLEBLIND-type mRNA splicing regulator required in adults for normal muscle dense body organization, locomotion, and vulval morphogenesis; MBL-1 is orthologous to Drosophila MBL and human MBNL1 (OMIM:606516), MBNL2 (OMIM:607327), and MBNL3 (OMIM:300413); mbl-1 is transcribed in larvae and adults; mbl-1(RNAi) animals show protrud…
(5) Other	1018	WBGene00009518	F38A1.5	clec-166	1.96664	4.32011	5.96	0.000126	0.0003	C-type LECtin		none available
(5) Other	1019	WBGene00018522	F46H5.7a	F46H5.7	48.4793	4.31934	12.8	1.24e-07	2.95e-06	not known		none available
(5) Other	1021	WBGene00016190	C28G1.5a	C28G1.5	5.11007	4.31872	7.06	3.02e-05	9.27e-05	not known		none available
(5) Other	1022	WBGene00008493	F01D5.2	F01D5.2	2.57341	4.31548	2.29	0.044	0.0565	not known		none available
(5) Other	1023	WBGene00022644	ZK6.10	dod-19	111.376	4.31419	3.4	0.00656	0.00994	Downstream Of DAF-16 (regulated by DAF-16)		none available
(5) Other	1024	WBGene00020155	T02B11.3a	T02B11.3	17.4601	4.31404	14.6	3.43e-08	1.98e-06	not known		none available
(5) Other	1025	WBGene00001189	F01D4.4	egl-21	21.5336	4.31382	13.7	6.35e-08	2.38e-06	EGg Laying defective		egl-21 encodes a putative carboxypeptidase (whose homologs include human enkephalin convertase/carboxypeptidase E); EGL-21 is expressed throughout the nervous system; EGL-21 is required for normal synthesis of FMRFamide-like (FLP) and neuropeptide-like (NLP) peptides, and for normal egg-laying, locomotion, and defecation; EGL-21 promotes acetylcholine release at neuromuscular junctions; egl-21 mu…
(5) Other	1026	WBGene00003375	T04C9.4a	mlp-1	11.7536	4.31248	8.26	7.44e-06	3.19e-05	MLP/CRP family (Muscle LIM Protein/Cysteine-rich Protein)		mlp-1 encodes a LIM domain-containing protein that is a member of the MLP/CRP family of muscle LIM domain proteins.
(5) Other	1027	WBGene00010833	M03B6.1	M03B6.1	0.676445	4.31139	3.44	0.00611	0.00932	not known		none available
(5) Other	1030	WBGene00006622	F31D4.6	try-4	0.191068	4.30596	2.37	0.0385	0.05	TRYpsin-like protease		none available
(5) Other	1031	WBGene00016061	C24G6.6	hpo-15	46.1783	4.30595	11.6	3.04e-07	4.49e-06	Hypersensitive to POre-forming toxin		none available
(5) Other	1032	WBGene00013499	Y70G10A.3	Y70G10A.3	6.89869	4.30476	11.5	3.45e-07	4.79e-06	not known		none available
(5) Other	1033	WBGene00016134	C26B9.5	C26B9.5	20.7032	4.30361	10.8	6.18e-07	6.32e-06	not known		none available
(5) Other	1034	WBGene00013946	ZK228.3	ZK228.3	10.1219	4.30339	14.5	3.63e-08	2.04e-06	not known		none available
(5) Other	1035	WBGene00002040	F56A6.2a	hum-7	6.51429	4.3027	15.5	1.89e-08	1.7e-06	Heavy chain, Unconventional Myosin		hum-7 encodes a class IX unconventional myosin heavy chain that contains a myosin motor domain in the head region and zinc-finger and rhoGAP (rho GTPase activating protein) domains in the tail region; HUM-7 is required during embryogenesis for cytokinesis and normal cytoplasmic rearrangements, and by homology, may function in organization of the actin cytoskeleton; the precise expression and loca…
(5) Other	1036	WBGene00003749	ZK1320.10	nlp-11	2.62794	4.30269	7.68	1.44e-05	5.21e-05	Neuropeptide-Like Protein		none available
(5) Other	1037	WBGene00011495	T05F1.11	T05F1.11	1.00819	4.30016	6.6	5.33e-05	0.000146	not known		This gene encodes a protein containing an F-box, a motif predicted to mediate protein-protein interactions either with homologs of yeast Skp-1p or with other proteins.
(5) Other	1039	WBGene00017807	F26A1.9	F26A1.9	0.220211	4.29912	2.28	0.0454	0.0581	not known		none available
(5) Other	1040	WBGene00009638	F42F12.7	nspc-14	3.88671	4.29838	9.57	1.94e-06	1.27e-05	Nematode Specific Peptide family, group C		none available
(5) Other	1041	WBGene00019205	H16O14.1a	kcc-2	16.7414	4.29683	16.7	9.11e-09	1.52e-06	K+/Cl- Cotransporter		kcc-2 encodes a potassium chloride cotransporter; in C. elegans, kcc-2 acts partially redundantly with the sodium-driven chloride-bicarbonate transporter, abts-1, for effecting GABA-receptor mediated inhibitory neurotransmission in the HSNs (hermaphrodite-specific neurons) that control egg-laying and in body wall muscle to control body length and movement; neuronal expression studies indicate tha…
(5) Other	1042	WBGene00000277	C23H4.1	cab-1	35.3405	4.29624	13.8	5.99e-08	2.33e-06	C-terminus-of-AEX-Binding protein		Novel protein which has a C-terminal motif weakly homologous to mouse NPDC-1 and is involved in synaptic regulation; it is expressed in various neurons including ventral cord and tail ganglion neurons; it physically interacts with AEX-3, which is a guanine nucleotide exchange factor for the Rab3 GTPase.
(5) Other	1043	WBGene00010648	K08C7.6	K08C7.6	4.40907	4.29502	10.3	9.31e-07	7.96e-06	not known		none available
(5) Other	1045	WBGene00000783	T10H4.12	cpr-3	13.0302	4.29437	4.41	0.00124	0.00221	Cysteine PRotease related		none available
(5) Other	1046	WBGene00022713	ZK355.3	ZK355.3	0.0687769	4.29245	3.52	0.0053	0.00819	not known		none available
(5) Other	1047	WBGene00015955	C18B2.4	C18B2.4	13.9718	4.29137	12.7	1.29e-07	2.97e-06	not known		none available
(5) Other	1048	WBGene00013136	Y53C10A.5	Y53C10A.5	10.0527	4.29105	11.9	2.39e-07	3.94e-06	not known		none available
(5) Other	1050	WBGene00003744	T23E7.4a	nlp-6	3.96003	4.28959	11.8	2.59e-07	4.1e-06	Neuropeptide-Like Protein		none available
(5) Other	1051	WBGene00015081	B0244.6	B0244.6	0.497481	4.28897	4.79	0.000676	0.00129	not known		none available
(5) Other	1052	WBGene00012478	Y18D10A.8	Y18D10A.8	5.65886	4.2868	13	1.01e-07	2.72e-06	not known		none available
(5) Other	1053	WBGene00003423	R10E9.1	msi-1	21.6149	4.28667	14.1	4.87e-08	2.26e-06	MuSashI (fly neural) family		none available
(5) Other	1054	WBGene00008229	C50F4.1	C50F4.1	11.8885	4.28659	7.95	1.05e-05	4.15e-05	not known		none available
(5) Other	1057	WBGene00043983	C39D10.11	C39D10.11	1.97069	4.28519	8.91	3.74e-06	2e-05	not known		none available
(5) Other	1058	WBGene00013869	ZC373.4	ZC373.4	8.88055	4.2818	15.9	1.44e-08	1.64e-06	not known		none available
(5) Other	1059	WBGene00006863	F56B6.4a	gyg-1	10.2193	4.27955	14	5.11e-08	2.3e-06	GlYcoGenin like		none available
(5) Other	1060	WBGene00009805	F47B8.4a	F47B8.4	0.982231	4.27391	3.1	0.0109	0.0158	not known		none available
(5) Other	1061	WBGene00022499	ZC8.3	set-30	5.98132	4.27012	12.9	1.11e-07	2.81e-06	SET (trithorax/polycomb) domain containing		set-30 encodes a divergent ortholog of human SMYD1 (OMIM:606846), SMYD2 (OMIM:610663), and SYMD3 (OMIM:608783); SET-30 is paralogous to SET-10, SET-14, and SET-18; neither set-30(gk314) nor set-30(RNAi) have any obvious phenotypes.
(5) Other	1062	WBGene00018221	F40A3.6	F40A3.6	6.88865	4.26772	10.2	1.04e-06	8.52e-06	not known		none available
(5) Other	1065	WBGene00011571	T07C12.7	ttr-46	44.565	4.26339	7.73	1.35e-05	4.97e-05	TransThyretin-Related family domain		none available
(5) Other	1066	WBGene00018274	F41C3.8a	F41C3.8	1.10487	4.26048	11.2	4.24e-07	5.29e-06	not known		none available
(5) Other	1067	WBGene00003816	F25G6.6	asns-1	0.398911	4.25946	3.84	0.00311	0.00508	ASparagiNe Synthetase		asns-1 encodes a predicted asparaginyl-tRNA synthetase (AsnRS), a class II aminoacyl-tRNA synthetase that catalyzes the attachment of asparagine to its cognate tRNA and is thus required for protein biosynthesis.
(5) Other	1068	WBGene00007055	F41E6.6	tag-196	19.5688	4.25792	12.6	1.43e-07	3.14e-06	Temporarily Assigned Gene name		none available
(5) Other	1069	WBGene00019612	K10B3.6a	K10B3.6	3.82202	4.25704	13	1.03e-07	2.73e-06	GlyceroPhosphoCholine Phosphodiesterase homolog		gpcp-1 encodes one of two C. elegans proteins orthologous to mammalian glycerophosphocholine phosphodiesterase (GPCPD1); by homology, GPCP-1 is predicted to catalyze the hydrolysis of glycero-3-phosphocholine to produce choline and glycerol 3-phosphate (EC=3.1.4.2).
(5) Other	1070	WBGene00014108	ZK856.7	ZK856.7	8.51167	4.25661	11.2	4.57e-07	5.49e-06	not known		none available
(5) Other	1071	WBGene00004986	T07C4.4	spp-1	13.1335	4.25658	5.44	0.000259	0.000554	SaPosin-like Protein family		spp-1 encodes a caenopore, a saposin (B) domain-containing protein that is a member of the saposin-like protein (SAPLIP) superfamily containing mammalian NK-lysin and granulysin and the protozoan amoebapore-like proteins; SPP-1 exhibits antibacterial activity in vitro and its expression in vivo is regulated by the DAF-2/insulin receptor signaling pathway and by the presence of bacterial pathogens…
(5) Other	1072	WBGene00045276	F18E3.13	F18E3.13	7.95109	4.25459	6.02	0.000116	0.00028	not known		none available
(5) Other	1073	WBGene00018342	F42A10.6	F42A10.6	10.0611	4.25398	6.16	9.53e-05	0.000238	not known		none available
(5) Other	1074	WBGene00008435	DH11.1	glna-2	6.90659	4.25389	11.3	3.95e-07	5.14e-06	GLutamiNAse		none available
(5) Other	1075	WBGene00014001	ZK593.1a	pyk-2	16.6747	4.25352	12.9	1.11e-07	2.8e-06	PYruvate Kinase		pyk-2 encodes one of two C. elegans pyruvate kinases; large-scale expression studies show that pyk-2 is expressed in the larval and adult intestine.
(5) Other	1076	WBGene00014213	ZK1073.1	ZK1073.1	11.8739	4.25287	14.5	3.47e-08	1.98e-06	not known		none available
(5) Other	1077	WBGene00010605	K06G5.1a	K06G5.1	140.13	4.25218	6.56	5.6e-05	0.000153	not known		none available
(5) Other	1078	WBGene00012185	W01F3.2	W01F3.2	31.5179	4.2517	8.37	6.64e-06	2.93e-05	not known		none available
(5) Other	1079	WBGene00013083	Y51A2D.18	Y51A2D.18	8.47241	4.25011	10.7	6.57e-07	6.52e-06	not known		none available
(5) Other	1081	WBGene00001990	K07A12.6	hot-5	0.19863	4.24904	3.65	0.00425	0.00671	Homolog of Odr-2 (Two)		hot-5 encodes a predicted membrane-associated protein that is a member of the Ly-6 superfamily of glycosylphosphatidylinositol (GPI)-linked signaling proteins and is homologous to ODR-2, a neuronally expressed protein required for olfaction; as loss of hot-5 activity via RNA-mediated interference (RNAi) does not result in any abnormalities, the precise role of HOT-5 in C. elegans development and/…
(5) Other	1082	WBGene00020530	T15B12.1a	T15B12.1	6.40836	4.24536	11	5.18e-07	5.85e-06	not known		none available
(5) Other	1083	WBGene00017591	F19C7.1	F19C7.1	95.9803	4.24345	9.53	2.02e-06	1.29e-05	not known		none available
(5) Other	1084	WBGene00016783	C49G7.5	irg-2	2.06336	4.24091	7.9	1.12e-05	4.31e-05	Infection Response Gene		irg-2 encodes a novel protein, conserved amongst nematodes; irg-2 expression is induced in response to infection by virulent strains of Pseudomonas aeruginosa in a manner dependent upon the bZIP transcription factor ZIP-2, but independent of the p38 MAPK pathway.
(5) Other	1085	WBGene00002055	F37B4.2	ifc-1	4.30476	4.24053	9.55	1.98e-06	1.28e-05	Intermediate Filament, C		ifc-1 encodes a nonessential intermediate filament protein; IFC-1 is predicted to function as a structural component of the cytoskeleton; IFC-1 has no function in RNAi assays.
(5) Other	1086	WBGene00006585	T20B3.2	tni-3	9.34994	4.24016	7.08	2.94e-05	9.09e-05	TropoNin I		tni-3 encodes one of the four elegans troponin I genes; tni-3 is required for coordinated movement, normal body and muscle morphology and for the proper contractions of the vulva and anus; CeTNI-3 interacts with both the body wall and pharynx troponin C; tni-3 is strongly expressed in body wall, head and vulval muscles.
(5) Other	1087	WBGene00004122	F35D11.2a	pqn-35	2.86867	4.23982	7.97	1.03e-05	4.07e-05	Prion-like-(Q/N-rich)-domain-bearing protein		The protein product of this gene is predicted to contain a glutamine/asparagine (Q/N)-rich ('prion') domain, by the algorithm of Michelitsch and Weissman (as of the WS77 release of WormBase, i.e., in wormpep77).
(5) Other	1088	WBGene00077437	Y59H11AR.6	Y59H11AR.6	5.73255	4.23843	8.58	5.32e-06	2.51e-05	not known		none available
(5) Other	1089	WBGene00012875	Y45F10B.13a	Y45F10B.13	9.18046	4.23813	15.1	2.46e-08	1.83e-06	not known		none available
(5) Other	1090	WBGene00016613	C43G2.4	best-9	0.456191	4.23487	9.32	2.47e-06	1.48e-05	BESTrophin (chloride channel) homolog		none available
(5) Other	1091	WBGene00003732	F14B8.1a	nhx-4	4.94151	4.23311	14.6	3.41e-08	1.98e-06	Na/H eXchanger		nhx-4 encodes two isoforms of a sodium/proton exchanger expressed in the plasma membrane of nearly all cells and cell types; in polarized epithelial cells, NHX-4::GFP appears specifically located in the basolateral membrane, like human SLC9A1 ('NHE1'; OMIM:107310); nhx-4 has no reported mutant or RNAi phenotype, but, given its ubiquitous expression, may represent a housekeeping exchanger generall…
(5) Other	1092	WBGene00009778	F46C5.1	F46C5.1	0.326263	4.23182	3.65	0.0043	0.00679	not known		none available
(5) Other	1093	WBGene00018271	F41C3.5	F41C3.5	167.947	4.23085	13.5	7.07e-08	2.41e-06	not known		F41C3.5 encodes a serine carboxypeptidase that is related to human cathepsin A (CTSA, OMIM:256540, mutations are associated with galactosialidosis: beta-galactosidase and alpha-neuraminidase deficiency); microarray experiments have shown that F41C3.5 mRNA levels are reduced in a lin-14 loss-of-function mutant background, suggesting that F41C3.5 expression is positively regulated by LIN-14; large-…
(5) Other	1096	WBGene00011069	R06F6.6	ceh-62	2.12966	4.22791	6.6	5.36e-05	0.000147	C. Elegans Homeobox		none available
(5) Other	1097	WBGene00017126	E04F6.6	E04F6.6	4.40284	4.22758	7.86	1.17e-05	4.43e-05	not known		none available
(5) Other	1098	WBGene00008311	C54G4.1a	rskn-2	15.2418	4.22501	15.8	1.51e-08	1.64e-06	RSK-pNinety (RSK-p90 kinase) homolog		none available
(5) Other	1099	WBGene00021834	Y54E10A.16	mab-31	10.0339	4.22241	12.3	1.77e-07	3.42e-06	Male ABnormal		mab-31 encodes a novel protein that is highly conserved amongst nematodes; mab-31 functions in the TGF-beta signaling pathway to regulate the male tail ray patterning process, specifically the positioning of the R7-derived ray cell cluster; a mab-31::gfp reporter is expressed in a wide variety of tissues, including the intestine, hypodermis, pharynx, and neuronal support cells; in males, mab-31::…
(5) Other	1100	WBGene00017840	F26G1.4	ttm-2	4.56271	4.22126	8.3	7.13e-06	3.09e-05	Toxin-regulated Targets of MAPK		none available
(5) Other	1101	WBGene00005833	C25F9.7	srw-86	0.786913	4.21987	4.74	0.000734	0.00138	Serpentine Receptor, class W		none available
(5) Other	1102	WBGene00001091	C01B10.1	drh-2	8.43338	4.21861	14.6	3.29e-08	1.98e-06	Dicer Related Helicase		drh-2 was identified, along with drh-1, as a gene that can encode a protein with similarity to DExH-box helicases; drh-2, however, is classified by WB as a pseudogene because it has two frameshifts, based on EST and RNASeq alignments; the first frameshift occurs in exon 4 and the second occurs in exon 8 of the current WB gene structure; drh-2 appears to be the first gene in an operon (CEOP4647) f…
(5) Other	1103	WBGene00006530	F44F4.11	tba-4	27.8704	4.21824	6.65	5.02e-05	0.000139	TuBulin, Alpha		tba-4 encodes a member of the alpha tubulin family that also includes tba-1, tba-2, and tba-3, and affects embryonic viability.
(5) Other	1104	WBGene00045390	C38C3.10	C38C3.10	0.218162	4.21682	3.66	0.00417	0.00661	not known		none available
(5) Other	1105	WBGene00010083	F55B11.1	F55B11.1	8.41298	4.21624	12	2.17e-07	3.7e-06	not known		The F55B11.1 gene encodes an ortholog of the human gene XANTHINE DEHYDROGENASE (XDH), which when mutated leads to xanthinuria (OMIM:278300).
(5) Other	1106	WBGene00012007	T25B9.1	T25B9.1	7.97476	4.21485	14.6	3.29e-08	1.98e-06	not known		T25B9.1 encodes an protein highly similar to 2-amino-3-keto-butyrate coenzyme A ligases (also called AKB ligases or glycine acetyltransferases; EC 2.3.1.29; R.W.
(5) Other	1107	WBGene00016659	C45B2.2	C45B2.2	0.469708	4.21341	2.92	0.015	0.021	not known		none available
(5) Other	1108	WBGene00016781	C49G7.3	C49G7.3	10.6541	4.21273	15.7	1.62e-08	1.64e-06	not known		none available
(5) Other	1109	WBGene00013853	ZC116.1a	ZC116.1	1.13228	4.21022	6.83	4.02e-05	0.000116	not known		none available
(5) Other	1110	WBGene00011539	T06E6.5	fbxa-135	1.22016	4.20896	4.48	0.00111	0.002	F-box A protein		This gene encodes a protein containing an F-box, a motif predicted to mediate protein-protein interactions either with homologs of yeast Skp-1p or with other proteins; this gene's encoded protein also contains an FTH/DUF38 motif, which may also mediate protein-protein interaction.
(5) Other	1111	WBGene00006825	F13C5.6a	unc-96	4.43728	4.20751	8.66	4.89e-06	2.37e-05	UNCoordinated		unc-96 encodes a novel protein with no recognizable domains; unc-96 was identified in screens for mutations that disrupt body wall muscle cell structure and is required for muscle thick filament assembly, maintenance of muscle organization in response to muscle contraction, and normal locomotion; mutations in unc-96 interact genetically with mutations in unc-54, unc-98, unc-15, and unc-105, which…
(5) Other	1112	WBGene00010117	F55F3.3a	nkb-3	25.1276	4.20691	13.9	5.3e-08	2.3e-06	Na+/K+ ATPase, Beta subunit		none available
(5) Other	1113	WBGene00012910	Y46G5A.20	Y46G5A.20	1.54565	4.20668	4.32	0.00142	0.0025	not known		none available
(5) Other	1114	WBGene00004119	F21C10.8a	pqn-31	3.35115	4.20594	10.3	1.01e-06	8.34e-06	Prion-like-(Q/N-rich)-domain-bearing protein		The protein product of this gene is predicted to contain a glutamine/asparagine (Q/N)-rich ('prion') domain, by the algorithm of Michelitsch and Weissman (as of the WS77 release of WormBase, i.e., in wormpep77).
(5) Other	1115	WBGene00015561	C07A12.7a	C07A12.7	11.1619	4.20381	15.7	1.61e-08	1.64e-06	not known		none available
(5) Other	1116	WBGene00009432	F35E12.8a	F35E12.8	5.74563	4.2022	8.87	3.93e-06	2.05e-05	not known		none available
(5) Other	1117	WBGene00000006	C55C2.5a	aat-5	2.60269	4.20178	10.3	9.81e-07	8.18e-06	Amino Acid Transporter		aat-5 encodes a predicted amino acid transporter catalytic subunit; unlike catalytic subunits in other organisms, however, AAT-5 does not contain the highly conserved cysteine residue known to facilitate covalent interaction with a glycoprotein subunit, suggesting that AAT-5 does not require this residue for heterodimer formation or alternatively, does not require the glycoprotein subunit for fun…
(5) Other	1118	WBGene00009049	F22B8.7	F22B8.7	9.39923	4.20001	7.6	1.58e-05	5.59e-05	not known		none available
(5) Other	1119	WBGene00010945	M176.8	chil-13	3.53141	4.19868	9.41	2.28e-06	1.4e-05	CHItinase-Like		none available
(5) Other	1120	WBGene00010085	F55B11.3	F55B11.3	36.6463	4.19804	9.73	1.65e-06	1.14e-05	not known		none available
(5) Other	1121	WBGene00002217	F56E3.3a	klp-4	13.6052	4.19569	13.6	6.67e-08	2.41e-06	Kinesin-Like Protein		klp-4 encodes a kinesin-like motor protein paralogous to UNC-104 and KLP-6 and orthologous to Drosophila KHC-73 and the vertebrate KIF1A, KIF13B, and GAKIN motor proteins; as loss of KLP-4 function via RNA-mediated interference (RNAi) does not result in any abnormalities, the precise role of KLP-4 in C. elegans development and/or behavior is not yet known; based on sequence similarity, however, K…
(5) Other	1122	WBGene00013899	ZC443.4	ZC443.4	3.023	4.19294	6.61	5.3e-05	0.000146	not known		none available
(5) Other	1123	WBGene00219322	C33C12.12	C33C12.12	0.0962121	4.19137	2.6	0.0259	0.0347	not known		none available
(5) Other	1124	WBGene00016030	C24A1.3a	C24A1.3	5.18841	4.18873	16.5	1.01e-08	1.53e-06	not known		none available
(5) Other	1125	WBGene00006592	R151.5a	dpy-31	10.2301	4.18851	13.9	5.37e-08	2.3e-06	DumPY: shorter than wild-type		dpy-31 encodes an astacin zinc-metalloprotease of the BMP-1 (bone morphogenetic protein-1)/TOLLOID family; dpy-31 activity is required for proper cuticle formation and thus for normal body morphology; in addition, dpy-31 is essential for embryonic and larval development at 25 degrees C; genetic and immunofluorescence studies suggest that DPY-31 functions as an endopeptidase that is required for p…
(5) Other	1126	WBGene00020586	T19F4.1a	frpr-18	0.21502	4.18821	2.81	0.0182	0.0251	FMRFamide Peptide Receptor family		T19F4.1 encodes, by alternative splicing, two G-protein coupled receptors for the flp-2-encoded peptides SPREPIRFamide (FLP2-A) and LRGEPIRFamide (FLP2-B); T19F4.1B protein has an extension of 30 residues more than T19F4.1A in the intracellular C-terminal region; activation of either T19F4.1A or T19F4.1B is temperature-independent, and T19F4.1A/B are probably linked to the G(q) pathway.
(5) Other	1127	WBGene00011891	T21C9.3a	del-6	31.3162	4.18794	13.1	9.47e-08	2.68e-06	DEgenerin Like		none available
(5) Other	1128	WBGene00012592	Y38E10A.14	Y38E10A.14	6.48121	4.18792	8.05	9.44e-06	3.81e-05	not known		Y38E10A.14 encodes a novel protein.
(5) Other	1129	WBGene00014252	ZK1320.2	ZK1320.2	31.6333	4.18789	8.8	4.2e-06	2.15e-05	not known		none available
(5) Other	1130	WBGene00000789	M04G12.2	cpz-2	26.9505	4.18713	10.2	1.07e-06	8.62e-06	CathePsin Z		none available
(5) Other	1131	WBGene00012445	Y16B4A.2	Y16B4A.2	48.8781	4.18597	9.56	1.96e-06	1.27e-05	not known		none available
(5) Other	1133	WBGene00012717	Y39E4B.6a	Y39E4B.6	11.3462	4.18547	12.9	1.16e-07	2.87e-06	not known		none available
(5) Other	1134	WBGene00020760	T24C4.4	T24C4.4	2.76335	4.18497	7.59	1.59e-05	5.61e-05	not known		none available
(5) Other	1135	WBGene00021981	Y58G8A.1	lgc-26	2.70701	4.17962	10.5	8.08e-07	7.24e-06	Ligand-Gated ion Channel		lgc-26 encodes a ligand-gated ion channel with similarity to the nicotinic acetylcholine receptors; lgc-26 activity is required for endocytosis by coelomocytes; an LGC-26::GFP fusion protein is expressed in coelomocytes and localizes to the cytoplasm.
(5) Other	1137	WBGene00044176	C30G7.2a	C30G7.2	0.789575	4.17565	5.51	0.000233	0.000507	not known		none available
(5) Other	1138	WBGene00014294	C53C7.5a	C53C7.5	15.9772	4.17404	12.9	1.16e-07	2.87e-06	not known		none available
(5) Other	1139	WBGene00010012	F53H10.2a	saeg-1	16.9145	4.16896	14.4	3.87e-08	2.09e-06	Suppressor of Activated EGL-4		none available
(5) Other	1140	WBGene00004131	F55A12.9a	pqn-44	19.9324	4.16815	14.6	3.43e-08	1.98e-06	Prion-like-(Q/N-rich)-domain-bearing protein		The protein product of this gene is predicted to contain a glutamine/asparagine (Q/N)-rich ('prion') domain, by the algorithm of Michelitsch and Weissman (as of the WS77 release of WormBase, i.e., in wormpep77).
(5) Other	1141	WBGene00009886	F49E2.2a	F49E2.2	7.72784	4.16679	12.9	1.1e-07	2.8e-06	not known		none available
(5) Other	1143	WBGene00009081	F23B12.4a	F23B12.4	5.98372	4.16509	14.3	4.07e-08	2.09e-06	not known		none available
(5) Other	1144	WBGene00009102	F25B3.5a	F25B3.5	1.37535	4.16448	5.06	0.000455	0.000909	not known		none available
(5) Other	1145	WBGene00005000	C48E7.10	spp-15	8.4566	4.16444	9.1	3.09e-06	1.74e-05	SaPosin-like Protein family		none available
(5) Other	1146	WBGene00019018	F57F10.1a	abts-3	3.8868	4.16412	8.1	8.96e-06	3.66e-05	Anion/Bicarbonate TranSporter family		abts-3 encodes an anion transporter; abts-3 promoter gfp fusions are expressed in neurons and hypodermal cells in a pattern coincident with abts-1.
(5) Other	1147	WBGene00011385	T02G6.2a	T02G6.2	0.838018	4.16325	6.24	8.62e-05	0.000219	not known		none available
(5) Other	1148	WBGene00021048	W05H9.1a	W05H9.1	46.5522	4.16022	7.8	1.25e-05	4.67e-05	not known		none available
(5) Other	1149	WBGene00007725	C25F9.5	C25F9.5	2.00205	4.16013	4.29	0.00149	0.00261	not known		none available
(5) Other	1150	WBGene00017180	F02E11.2a	F02E11.2	0.137102	4.15971	3.2	0.00921	0.0135	not known		none available
(5) Other	1151	WBGene00008273	C53B4.3	C53B4.3	7.95546	4.15861	9.14	2.96e-06	1.69e-05	not known		C53B4.3 is orthologous to the human gene, Solute Carrier Family 22 (Organic Cation Transporter), Member 18, referred to as SLC22A18; C53B4.3 is expressed in body wall muscle based on large-scale GFP studies.
(5) Other	1152	WBGene00016419	C34G6.2	tyr-4	37.3113	4.15768	12.2	1.92e-07	3.47e-06	TYRosinase		none available
(5) Other	1153	WBGene00014091	ZK822.4	ZK822.4	13.1756	4.15679	13.6	6.53e-08	2.38e-06	not known		none available
(5) Other	1154	WBGene00012339	W07G4.5	W07G4.5	10.1476	4.15086	9.08	3.15e-06	1.77e-05	not known		none available
(5) Other	1155	WBGene00009634	F42F12.1	nspc-9	2.41716	4.14984	7.37	2.08e-05	6.93e-05	Nematode Specific Peptide family, group C		none available
(5) Other	1156	WBGene00019411	K05F1.10	K05F1.10	3.07342	4.1493	6.88	3.75e-05	0.00011	not known		K05F1.10 encodes a putative secreted TIL-domain protease inhibitor paralogous to SWM-1, ISL-1, and the products of 11 other C. elegans genes; K05F1.10 and its relatives are collectively similar to other TIL-domain protease inhibitors from nematodes, insects, and vertebrates; K05F1.10 transcription is reproducibly induced by infection, suggesting that it may participate in innate immunity.
(5) Other	1157	WBGene00006779	K11E8.1a	unc-43	25.6062	4.14599	14.8	2.95e-08	1.95e-06	UNCoordinated		unc-43 encodes the C. elegans ortholog of type II calcium/calmodulin-dependent protein kinase (CaMKII); unc-43 activity is required for a number of processes, including locomotion, neuronal cell fate specification and regulation of synaptic density, egg laying, defecation, and meiotic maturation; in regulating some of these processes, unc-43 acts in concert with MAPKKK and G protein signaling pat…
(5) Other	1158	WBGene00010918	M117.1a	M117.1	5.70603	4.14543	14.7	3.14e-08	1.98e-06	not known		none available
(5) Other	1159	WBGene00012125	T28D6.5a	T28D6.5	5.62047	4.14506	11.9	2.42e-07	3.95e-06	not known		none available
(5) Other	1160	WBGene00010407	H19N07.3a	H19N07.3	2.59912	4.14468	11.5	3.36e-07	4.74e-06	not known		none available
(5) Other	1162	WBGene00021491	Y40B10A.6	comt-4	2.95699	4.14242	2.83	0.0174	0.0241	Catechol-O-MethylTransferase family		none available
(5) Other	1163	WBGene00002224	F22F4.3a	klp-13	0.172044	4.14189	2.52	0.0297	0.0393	Kinesin-Like Protein		klp-13 encodes an atypical kinesin-like motor protein similar to Saccharomyces cerevisiae Kip3, which has been implicated in nuclear migration; as loss of KLP-13 function via RNA-mediated interference (RNAi) does not result in any abnormalities, the precise role of KLP-13 in C. elegans development and/or behavior is not yet known.
(5) Other	1164	WBGene00019468	not known	K07B1.8	13.8055	4.14115	9.03	3.33e-06	1.84e-05	not known		none available
(5) Other	1165	WBGene00008538	F02H6.5a	sqrd-1	3.69646	4.14037	8.57	5.37e-06	2.53e-05	Sulfide Quinone oxidoReDuctase		none available
(5) Other	1166	WBGene00017440	F13H8.7	upb-1	53.4576	4.13946	7.84	1.2e-05	4.53e-05	UreidoPropionase Beta		upb-1 encodes the C. elegans ortholog of 3-ureidopropionase; UPB-1 exhibits enzymatic activity in vitro, catalyzing the catabolism of 3-ureidopropionate and 2-methyl-3-ureidopropionate; a UPB-1::GFP fusion is expressed throughout larval development and in adults; UPB-1::GFP localizes to the dense body of striated body wall muscles, suggesting that UPB-1 may play a role in synthesis of carnosin-li…
(5) Other	1167	WBGene00006404	C31C9.1a	tag-10	25.7274	4.13599	10	1.23e-06	9.33e-06	Temporarily Assigned Gene name		tag-10 encodes, by alternative splicing, two nearly identical proteins; TAG-10 proteins are putatively secreted, with an N-terminal signal sequence and four C-terminal WD40 repeats; TAG-10 proteins are orthologous to the GA1 apical gut membrane polyprotein of Haemonchus contortus, and more distantly similar to the periplasmic TolB colicin receptor subunit of E. coli.
(5) Other	1168	WBGene00009679	F44D12.2	F44D12.2	2.35508	4.13559	7.56	1.65e-05	5.76e-05	not known		none available
(5) Other	1169	WBGene00013292	Y57G11A.4	Y57G11A.4	3.04533	4.13555	9.23	2.71e-06	1.59e-05	not known		none available
(5) Other	1170	WBGene00015684	C10G8.8a	C10G8.8	36.5521	4.13521	8.8	4.21e-06	2.15e-05	not known		none available
(5) Other	1171	WBGene00003097	C17G10.5	lys-8	87.3333	4.1352	10.2	1.03e-06	8.46e-06	LYSozyme		lys-8 encodes a putative lysozyme required for normal longevity, probably because it prevents killing of C. elegans by bacteria infecting its gut; LYS-8 is expressed in intestine up to the terminal bulb of the pharynx, as well as in g1 and g2 pharyngeal gland cells; LYS-8 expression is induced by infection with Serratia marcescens, Pseudomonas aeruginosa, or (weakly) by Microbacterium nematophilu…
(5) Other	1172	WBGene00012886	Y45F10D.6	Y45F10D.6	1.71594	4.13474	9.05	3.26e-06	1.81e-05	not known		none available
(5) Other	1173	WBGene00013643	Y105C5A.24	Y105C5A.24	3.99661	4.13422	9.11	3.05e-06	1.73e-05	not known		none available
(5) Other	1174	WBGene00021121	W09G12.7	W09G12.7	2.73132	4.13397	6.79	4.18e-05	0.00012	not known		none available
(5) Other	1175	WBGene00007574	C14B1.3	C14B1.3	6.86813	4.13349	10.7	7.06e-07	6.76e-06	not known		This gene encodes a protein containing an F-box, a motif predicted to mediate protein-protein interactions either with homologs of yeast Skp-1p or with other proteins.
(5) Other	1176	WBGene00012433	Y11D7A.9	Y11D7A.9	0.438405	4.13248	3.01	0.0128	0.0182	not known		none available
(5) Other	1177	WBGene00003876	C06G8.2	pept-2	7.46123	4.12974	14.9	2.79e-08	1.92e-06	PEPTide transporter family		pept-2 encodes a high-affinity, proton-coupled oligopeptide transporter; when expressed in Xenopus ooctyes, PEPT-2 exhibits proton-coupled transport activity for a broad spectrum of peptide substrates; pept-2 mRNA is detected at all stages of development, but is expressed at highest levels in late larval and adult stages; additionally, a pept-2::GFP reporter exhibits expression primarily in vulva…
(5) Other	1179	WBGene00011213	R10E8.8	R10E8.8	1.2185	4.12758	7.32	2.2e-05	7.25e-05	not known		none available
(5) Other	1180	WBGene00003485	W10G6.3	mua-6	44.0638	4.12632	15.1	2.33e-08	1.8e-06	MUscle Attachment abnormal		mua-6 encodes an essential intermediate filament protein (MUA-6/IFA-2) that is coexpressed with the essential IF protein IFB-1; MUA-6 is required for hypodermal integrity and for lasting attachment of muscles to the body wall; MUA-6 is also required for normal positioning of excretory canals and muscles; MUA-6 forms heteropolymeric intermediate filaments in vitro with an equimolar mixture of IFB-…
(5) Other	1181	WBGene00011803	T16G12.1	T16G12.1	13.76	4.12407	9.04	3.27e-06	1.81e-05	not known		none available
(5) Other	1182	WBGene00010540	K03H1.5	K03H1.5	5.82875	4.12279	10.2	1.04e-06	8.5e-06	not known		none available
(5) Other	1183	WBGene00019961	R08E5.1	R08E5.1	0.288553	4.12121	2.23	0.0491	0.0624	not known		none available
(5) Other	1184	WBGene00006591	T24A11.3	toh-1	8.29206	4.12121	13.5	6.95e-08	2.41e-06	TOllisH (tolloid and BMP-1 family)		toh-1 encodes an astacin-like metalloprotease; TOH-1 is predicted to function as a secreted protease; experiments that specifically assessed toh-1's role in molting indicate that toh-1(RNAi) causes no abnormal phenotypes.
(5) Other	1187	WBGene00019957	R08E3.1a	R08E3.1	97.5747	4.11825	6.1	0.000103	0.000254	not known	EGF-like	none available
(5) Other	1191	WBGene00015469	C05D2.8	C05D2.8	28.9447	4.1143	11.1	4.94e-07	5.77e-06	not known		none available
(5) Other	1192	WBGene00003374	K11D12.10a	mlk-1	8.53374	4.11244	14.8	2.96e-08	1.95e-06	human MLK (Mixed Lineage Kinase) homolog		none available
(5) Other	1193	WBGene00008354	D1025.2	gcsh-1	4.86714	4.11155	7.61	1.55e-05	5.5e-05	Glycine Cleavage System H protein		none available
(5) Other	1194	WBGene00016555	C40D2.2	math-20	2.28523	4.11024	8.87	3.92e-06	2.05e-05	MATH (meprin-associated Traf homology) domain containing		The C40D2.2 gene encodes a protein closely similar to C46F9.3, which has a meprin-associated Traf homology (MATH) domain and may be involved in apoptosis.
(5) Other	1196	WBGene00008356	D1025.4	nspc-20	1.06253	4.10962	3.81	0.00327	0.0053	Nematode Specific Peptide family, group C		none available
(5) Other	1197	WBGene00019868	R04B3.3	R04B3.3	0.165263	4.10827	3.65	0.00428	0.00675	not known		none available
(5) Other	1200	WBGene00001068	F16F9.2	dpy-6	3.17342	4.10597	9.06	3.2e-06	1.79e-05	DumPY: shorter than wild-type		dpy-6 encodes a novel, conserved protein that has similarity to human MUC2, a component of mucus layers; dpy-6 activity is required for normal body morphology; DPY-6 binds bovine calmodulin in vitro in a calcium-dependent manner.
(5) Other	1201	WBGene00007424	C08B6.3a	C08B6.3	1.10676	4.10388	3.99	0.00242	0.00404	not known		none available
(5) Other	1202	WBGene00000822	F40E10.3	csq-1	45.8659	4.10377	7.83	1.21e-05	4.56e-05	CalSeQuestrin		csq-1 encodes a calsequestrin that is required to normal survival in media containing either excess or deficient Ca[2+], and that also binds UNC-68's intraluminal domain; CSQ-1 binds Ca[2+] in vitro, and is thought to buffer Ca[2+] stores in sarcoplasmic reticulum; CSQ-1 is expressed in bodywall muscle cells from mid-embryogenesis to adulthood, as well as in vulval muscles, and in the isthmus and…
(5) Other	1203	WBGene00008494	F01D5.3	F01D5.3	4.10553	4.10289	3.78	0.00341	0.00551	not known		none available
(5) Other	1206	WBGene00019058	F58F9.4	F58F9.4	0.696199	4.10158	2.83	0.0175	0.0242	not known		none available
(5) Other	1209	WBGene00007938	C34F6.1	C34F6.1	0.178346	4.09664	2.58	0.0271	0.0362	not known		none available
(5) Other	1210	WBGene00011936	T22H2.6a	pgrn-1	15.3189	4.09573	13	1.02e-07	2.73e-06	ProGRaNulin homolog		pgrn-1 encodes an ortholog of human progranulin with three predicted granulin domains; pgrn-1 regulates the clearance of apoptotic cells, as loss of pgrn-1 results in an increased rate of apoptotic cell clearance; genetic studies indicate that the pgrn-1 activity requires the normal functioning of existing cell engulfment pathways; pgrn-1 is a secreted protein found in intestinal organelles, in t…
(5) Other	1211	WBGene00011833	T19B10.5	T19B10.5	5.26926	4.09554	7.9	1.11e-05	4.31e-05	not known		T19B10.5 encodes a protein with partial similarity to human PERIAXIN (PRX; OMIM:605725), which when mutated leads to Dejerine-Sottas neuropathy.
(5) Other	1212	WBGene00009652	F43D2.3	F43D2.3	0.165263	4.09503	5.18	0.00038	0.000777	not known		none available
(5) Other	1213	WBGene00020736	T23F2.3	T23F2.3	4.83282	4.09339	8.09	8.98e-06	3.66e-05	not known		none available
(5) Other	1214	WBGene00004858	R12B2.1a	sma-4	6.79083	4.09123	10.3	9.3e-07	7.95e-06	SMAll		sma-4 encodes a Smad protein and a homolog of human DPC4, which when mutated leads to pancreatic carcinoma (OMIM:260350); SMA-4 is similar to members of the vertebrate protein family of Dwarfins; during development, sma-4 functions as part of a DBL-1/SMA-6 TGF-beta-related signaling pathway that controls body size and male tail sensory ray and spicule formation; sma-4, through this pathway, also …
(5) Other	1215	WBGene00006801	K11C4.5a	unc-68	35.5705	4.08897	11	5.43e-07	6e-06	UNCoordinated		unc-68 encodes a ryanodine receptor ortholog that is expressed in body-wall muscle cells and is required for normal body tension and locomotion; unc-68 mutants are flaccid, sluggish, and resistant to ryanodine, but have normal muscle ultrastructure; UNC-68 is dispensable for excitation-contraction coupling itself, but may amplify its calcium signals; the unc-68/kra-1(kh30) mutation is an S1444N s…
(5) Other	1216	WBGene00016434	C35B1.4	C35B1.4	11.2387	4.08713	8.41	6.33e-06	2.84e-05	not known		none available
(5) Other	1219	WBGene00018969	F56D3.1	F56D3.1	1.00566	4.08687	3.07	0.0115	0.0166	not known		none available
(5) Other	1220	WBGene00000785	W07B8.5	cpr-5	29.0001	4.08663	3.41	0.00636	0.00966	Cysteine PRotease related		cpr-5 encodes a cysteine protease.
(5) Other	1221	WBGene00006582	C08D8.2a	tmd-2	4.40469	4.0843	8.93	3.69e-06	1.98e-05	TropoMoDulin		none available
(5) Other	1222	WBGene00022549	ZC196.5	ZC196.5	1.66018	4.08156	4.94	0.000545	0.00106	not known		none available
(5) Other	1223	WBGene00001460	C52D10.11	flp-17	3.31535	4.07985	10.4	8.6e-07	7.55e-06	FMRF-Like Peptide		flp-17 encodes a FMRFamide-related neuropeptide; FLP-17 displays potent excitatory activity on pharyngeal muscle pumping; a flp-17::gfp promoter fusion is expressed in the ciliated BAG neuron and M5 pharyngeal motoneuron, as well as in male-specific rays R1B, R5B, and R7B.
(5) Other	1224	WBGene00008214	C49F8.2	gem-1	6.09333	4.07972	8.51	5.74e-06	2.65e-05	Gon-2 Extragenic Modifier		none available
(5) Other	1226	WBGene00022745	ZK470.2a	ZK470.2	22.0065	4.07905	15.5	1.81e-08	1.7e-06	not known		none available
(5) Other	1227	WBGene00011732	T12D8.4	arrd-17	4.05784	4.07477	11.2	4.24e-07	5.29e-06	ARRestin Domain protein		none available
(5) Other	1229	WBGene00006667	F29F11.4	twk-12	0.482274	4.07278	3.72	0.00377	0.00603	TWiK family of potassium channels		twk-12 encodes one of 44 C. elegans TWK (two-P domain K+) potassium channel subunits that contain two pore-forming domains and four transmembrane domains; as loss of TWK-12 function via RNA-mediated interference (RNAi) does not result in any abnormalities, the precise role of TWK-12 in C. elegans development and/or behavior is not yet known; TWK-12 may, however, function redundantly with other TW…
(5) Other	1230	WBGene00000103	F28H6.1a	akt-2	7.45532	4.07265	12.5	1.56e-07	3.28e-06	AKT kinase family		akt-2 encodes a homolog of the serine/threonine kinase Akt/PKB, AKT-2, that is required for progression through the dauer stage of development and for the negative regulation of adult lifespan; inactivation of akt-2 causes animals to arrest constitutively at the dauer stage, while having an increased life span; widely expressed, AKT-2 is activated by the phospholipid products of phosphoinositide …
(5) Other	1231	WBGene00044615	B0252.8	B0252.8	0.551875	4.0725	3.54	0.00512	0.00795	not known		none available
(5) Other	1232	WBGene00018217	F40A3.2	F40A3.2	10.8555	4.07192	12.3	1.76e-07	3.42e-06	not known		none available
(5) Other	1233	WBGene00002026	C12C8.1	hsp-70	6.82069	4.07192	3.01	0.0127	0.0182	Heat Shock Protein		hsp-70 encodes a heat-shock protein that is a member of the hsp70 family of molecular chaperones.
(5) Other	1235	WBGene00014088	ZK809.8a	ZK809.8	10.5228	4.06978	8.17	8.28e-06	3.46e-05	not known		none available
(5) Other	1236	WBGene00010947	M176.11	M176.11	3.5224	4.06973	8.76	4.39e-06	2.2e-05	not known		none available
(5) Other	1237	WBGene00018145	F37C4.5a	F37C4.5	175.209	4.06969	13.8	5.7e-08	2.31e-06	not known		none available
(5) Other	1238	WBGene00011938	T22H6.2a	alh-13	14.2931	4.06827	7.97	1.04e-05	4.1e-05	ALdehyde deHydrogenase		none available
(5) Other	1239	WBGene00021984	Y59C2A.1	Y59C2A.1	6.04332	4.06718	13.3	8.26e-08	2.54e-06	not known		none available
(5) Other	1240	WBGene00001560	T22H6.6a	gei-3	25.6292	4.06568	11.6	3.07e-07	4.51e-06	GEX Interacting protein		gei-3 encodes a member of the high mobility group (HMG) protein family; interacts with GEX-3 in yeast two-hybrid assays.
(5) Other	1241	WBGene00012834	Y43F8C.13	Y43F8C.13	14.6893	4.0654	9.7	1.72e-06	1.17e-05	not known		none available
(5) Other	1242	WBGene00004156	W02A2.3a	pqn-74	1.39667	4.06485	5.29	0.000322	0.000671	Prion-like-(Q/N-rich)-domain-bearing protein		pqn-74 encodes a protein with two chitin-binding peritrophin-A domains, separated by a glutamine/asparagine (Q/N)-rich ('prion') domain; like CEJ-1 and CPG-2, PQN-74 might participate in eggshell synthesis and early embryonic development, and PQN-74's peritrophin-A domains might enable mechanical cross-linking of chitin.
(5) Other	1244	WBGene00009971	F53C11.1a	F53C11.1	10.0107	4.06085	7.52	1.72e-05	5.96e-05	not known		none available
(5) Other	1245	WBGene00019859	R03H10.7	R03H10.7	0.49504	4.06073	2.86	0.0166	0.0231	not known		none available
(5) Other	1246	WBGene00022515	ZC64.2	ttr-48	20.1804	4.05957	10.2	1.07e-06	8.65e-06	TransThyretin-Related family domain		none available
(5) Other	1247	WBGene00020146	T01C8.5	got-1.2	19.155	4.05945	14.6	3.24e-08	1.98e-06	Glutamate Oxaloacetate Transaminase		none available
(5) Other	1248	WBGene00001448	C03G5.7	flp-5	2.42752	4.05913	7.62	1.54e-05	5.47e-05	FMRF-Like Peptide		flp-5 encodes a predicted FMRFamide-like peptide neurotransmitter that increases action potential frequency in the pharyngeal muscle when applied to the pharynx of dissected worms; expressed in the sensory neurons ASE and PVM.
(5) Other	1249	WBGene00044500	T19E7.6	T19E7.6	2.75068	4.05894	6.79	4.21e-05	0.00012	not known		none available
(5) Other	1250	WBGene00019170	H06I04.6a	H06I04.6	7.37197	4.05478	13.4	7.5e-08	2.41e-06	not known		none available
(5) Other	1251	WBGene00008298	C54D10.3	C54D10.3	8.80813	4.05447	15.1	2.38e-08	1.8e-06	not known		none available
(5) Other	1252	WBGene00020806	T25F10.3	T25F10.3	3.20797	4.05336	12	2.19e-07	3.7e-06	not known		none available
(5) Other	1253	WBGene00009408	F35C12.3a	F35C12.3	3.14307	4.05302	7.39	2.03e-05	6.8e-05	not known		none available
(5) Other	1255	WBGene00006845	F11C3.2	unc-122	1.2808	4.05156	6.89	3.69e-05	0.000108	UNCoordinated		unc-122 encodes a predicted type II transmembrane protein with extracellular collagen-like domains and a highly conserved olfactomedin (OLF) domain that is found in a family of secreted proteins involved in formation and function of nervous systems; UNC-122 is required for proper locomotion and for normal morphology of the DVB motorneuron, and may regulate neuromuscular function by acting in an a…
(5) Other	1256	WBGene00050904	Y70C5A.3	Y70C5A.3	1.07462	4.04955	6.07	0.000108	0.000264	not known		none available
(5) Other	1257	WBGene00194769	Y32B12C.5	Y32B12C.5	0.913616	4.04821	4.23	0.00165	0.00287	not known		none available
(5) Other	1258	WBGene00006923	F08B1.1a	vhp-1	20.0233	4.04809	11	5.02e-07	5.79e-06	VH1 dual-specificity phosphatase family		vhp-1 encodes a MAP kinase phosphatase (MKP); VHP-1 activity is required for regulation of the KGB-1/JNK-like MAPK-mediated stress response pathway.
(5) Other	1259	WBGene00021434	Y39A3A.3	Y39A3A.3	0.343735	4.04746	2.93	0.0146	0.0206	not known		none available
(5) Other	1260	WBGene00012225	W03G11.3	W03G11.3	3.76697	4.04707	11.4	3.72e-07	4.98e-06	not known		none available
(5) Other	1261	WBGene00008258	C52E4.5a	mans-2	11.8277	4.0446	12.7	1.27e-07	2.95e-06	MAnnoSidase (family 47 glycohydrolase)		none available
(5) Other	1262	WBGene00022375	Y94H6A.2	Y94H6A.2	0.605593	4.04402	4.79	0.000683	0.0013	not known		none available
(5) Other	1263	WBGene00004321	F54E7.7	rcn-1	5.54311	4.04199	12.8	1.24e-07	2.95e-06	Regulator of CalciNeurin		rcn-1 encodes a calcipressin, which binds and inhibits calcineurin; RCN-1's orthologs include yeast Rcn1p and human DSCR1 (OMIM:602917; overexpressed in Down syndrome and Alzheimer disease); rcn-1 is expressed in hypodermal seam cells, various neurons, vulval epithelial and muscle cells, marginal pharyngeal cells, and in the male tail; rcn-1 transcription is regulated by TAX-6, and RCN-1 binds TA…
(5) Other	1266	WBGene00002021	F52E1.7a	hsp-17	10.5689	4.04107	6.7	4.7e-05	0.000132	Heat Shock Protein		hsp-17 encodes a heat shock protein that is a member of the hsp16/hsp20/alpha-crystallin family of heat shock proteins; by homology, HSP-17 is predicted to function as a molecular chaperone that protects cells from heat-induced protein aggregation and denaturation.
(5) Other	1267	WBGene00010174	F56H9.2a	F56H9.2	42.8823	4.04098	7.89	1.13e-05	4.35e-05	not known		none available
(5) Other	1268	WBGene00020632	T20F7.5	T20F7.5	1.84919	4.04081	8.17	8.27e-06	3.46e-05	not known		none available
(5) Other	1269	WBGene00044728	Y53F4B.45	Y53F4B.45	10.5012	4.03946	7.46	1.86e-05	6.36e-05	not known		none available
(5) Other	1271	WBGene00044737	JC8.14	ttr-45	37.1456	4.03763	9.01	3.38e-06	1.85e-05	TransThyretin-Related family domain		none available
(5) Other	1273	WBGene00002048	B0244.2	ida-1	15.0548	4.03682	13.9	5.34e-08	2.3e-06	related to Islet cell Diabetes Autoantigen		ida-1 encodes a protein tyrosine phosphatase-like receptor, orthologous to the mammalian type I diabetes autoantigens IA-2 and phogrin that are expressed in dense core vesicles of neuroendocrine tissue and involved in regulated protein secretion; in C. elegans, IDA-1 appears to be required for regulating presynaptic neurotransmission and in particular, for the neuropeptidergic control of egg-layi…
(5) Other	1274	WBGene00009241	F28H7.8	F28H7.8	4.14986	4.03452	9.95	1.35e-06	9.89e-06	not known		none available
(5) Other	1275	WBGene00019656	K11G12.5	K11G12.5	23.0663	4.03396	14.4	3.9e-08	2.09e-06	not known		none available
(5) Other	1278	WBGene00003409	E03G2.2	mrp-3	10.8806	4.03003	14.3	3.99e-08	2.09e-06	Multidrug Resistance Protein family		none available
(5) Other	1280	WBGene00001508	C10F3.6	fut-8	3.57909	4.02811	12.2	1.87e-07	3.44e-06	FUcosyl Transferase		fut-8 encodes a core alpha 1,6-fucosyltransferase; characterization of a recombinant form of the protein that contains the catalytic region of FUT-8 reveals a sustrate requirement for unsubstituted nonreducing terminal GlcNAc residues.
(5) Other	1281	WBGene00016735	C46H11.11	fhod-1	12.4009	4.02806	10.6	7.53e-07	7e-06	Formin HOmology Domain		none available
(5) Other	1282	WBGene00003178	F57H12.7a	mec-17	3.39125	4.02762	6.68	4.81e-05	0.000134	MEChanosensory abnormality		mec-17 encodes an alpha-tubulin acetyltransferase; MEC-17 activity is required for maintaining the differentiated state of the touch receptor neurons, and hence the animal's touch sensitivity, during later stages of larval development; MEC-17 and W06B11.1 function redundantly for acetylation of K40 on MEC-12 alpha-tubulin; mec-17 is expressed solely in the touch receptor cells from late embryogen…
(5) Other	1283	WBGene00012382	Y5F2A.1	ttr-16	81.2326	4.02477	7.94	1.06e-05	4.18e-05	TransThyretin-Related family domain		none available
(5) Other	1284	WBGene00015389	C03F11.3	scav-1	12.1588	4.0245	9.59	1.9e-06	1.25e-05	SCAVenger receptor (CD36 family) related		none available
(5) Other	1285	WBGene00016658	C45B2.1	C45B2.1	14.4054	4.0202	5.36	0.00029	0.000612	not known		none available
(5) Other	1286	WBGene00008595	F08H9.7	clec-56	8.67899	4.01789	10.3	9.92e-07	8.24e-06	C-type LECtin		none available
(5) Other	1287	WBGene00012854	Y44A6D.3a	Y44A6D.3	4.13944	4.01708	11	5.17e-07	5.84e-06	not known		none available
(5) Other	1289	WBGene00000224	F26D10.9a	atgp-1	11.8885	4.01365	12.6	1.45e-07	3.16e-06	Amino acid Transporter GlycoProtein subunit		atgp-1 encodes a predicted amino acid transporter glycoprotein subunit; when co-expressed in Xenopus oocytes with the AAT-1 or AAT-3 catalytic subunit, ATGP-1 is not able to facilitate amino acid uptake, even though ATGP-1 is able to covalently associate with AAT-1 or AAT-3 in the Xenopus expression system; however, when co-expressed with AAT-9, ATGP-1 is able to enhance the activity of this cata…
(5) Other	1290	WBGene00004859	W06B3.2a	sma-5	5.77975	4.01227	12	2.32e-07	3.87e-06	SMAll		sma-5 encodes a serine/threonine kinase homologous to the mammalian MAP kinase MAPK7/ERK5 (OMIM:602521, required for development of extraembryonic vasculature and embryonic cardiovasculature); SMA-5 is required for normal body size morphogenesis, growth rates, and intestinal granule distribution, and for regulating the size of the intestine, body wall muscle, and hypodermis, as well as the number…
(5) Other	1291	WBGene00018303	F41G3.10	F41G3.10	6.4843	4.01154	12.4	1.59e-07	3.29e-06	not known		none available
(5) Other	1292	WBGene00001745	R06A10.2a	gsa-1	16.5065	4.01037	6.38	7.11e-05	0.000186	G protein, Subunit Alpha		The gsa-1 gene encodes a Gs alpha subunit of heterotrimeric G proteins which affects L1 larval stage viability, movement, and egg laying; it is genetically upstream of sgs-1 with respect to neuronal degeneration, as defined by gain-of-function analysis, and is expressed in excitable cells.
(5) Other	1293	WBGene00001575	Y37A1B.15	gei-18	0.197527	4.00882	2.6	0.026	0.0349	GEX Interacting protein		none available
(5) Other	1294	WBGene00010822	M01G12.9	M01G12.9	2.77632	4.00857	3.73	0.00373	0.00598	not known		none available
(5) Other	1295	WBGene00016919	C54E4.4	C54E4.4	0.263168	4.00828	4.79	0.000685	0.0013	not known		none available
(5) Other	1296	WBGene00019624	K10C9.3	K10C9.3	10.7507	4.00708	9.58	1.92e-06	1.26e-05	not known		none available
(5) Other	1297	WBGene00018384	F43C11.7	F43C11.7	4.47262	4.00616	7.44	1.91e-05	6.48e-05	not known		none available
(5) Other	1298	WBGene00000942	ZC477.9a	deb-1	24.8522	4.0061	10.8	6.3e-07	6.41e-06	DEnse Body		The deb-1 gene encodes a vinculin ortholog highly conserved amongst metazoans including Drosophila, chick, and humans (OMIM:193065); DEB-1 is a muscle attachment protein found in dense bodies, and is required for attaching actin thin filaments to the basal sarcolemma; DEB-1 requires PAT-4/integrin-linked kinase for full assembly into nascent attachments.
(5) Other	1299	WBGene00000284	T28F2.3	cah-6	0.693549	4.00438	5.05	0.000461	0.000919	Carbonic AnHydrase		cah-6 encodes a predicted carbonic anhydrase.
(5) Other	1300	WBGene00011798	T16G1.4	T16G1.4	0.347464	4.00402	2.71	0.0216	0.0294	not known		none available
(5) Other	1302	WBGene00022142	Y71G12B.2	Y71G12B.2	0.703492	4.00252	3.55	0.00501	0.0078	not known		none available
(5) Other	1303	WBGene00015879	C17B7.5	C17B7.5	1.08753	4.00225	2.97	0.0137	0.0194	not known		none available
(5) Other	1304	WBGene00003752	D1009.4a	nlp-14	4.8598	4.00172	10.7	6.95e-07	6.7e-06	Neuropeptide-Like Protein		none available
(5) Other	1305	WBGene00017718	F22F4.5	F22F4.5	2.88819	4.00145	9.07	3.19e-06	1.78e-05	not known		none available
(5) Other	1306	WBGene00011112	R07E5.4	R07E5.4	9.78596	4.00062	11.9	2.42e-07	3.95e-06	not known		none available

## Sheet: Supplementary file 1b
Grouping	Rank	WormBase ID	Sequence	Gene Name	WT CPM	FC	t	P	FDR	Gene Class	Manual Annotation	Description
(1) Detoxification	11	WBGene00010148	F56D5.3	F56D5.3	1.27868	0.127096	-4.06	0.00216	0.296	not known	NADH:flavin oxidoreductase; NADH oxidase	none available
(1) Detoxification	23	WBGene00001764	F37B1.5	gst-16	2.11281	0.176074	-4.4	0.00126	0.215	Glutathione S-Transferase		none available
(1) Detoxification	36	WBGene00001752	K08F4.7	gst-4	14.1712	0.237106	-6.6	5.38e-05	0.0484	Glutathione S-Transferase		gst-4 encodes a putative glutathione-requiring prostaglandin D synthase; gst-4 is required for sperm to normally migrate towards a PUFA-based signal exuded by oocytes; gst-4(RNAi) hermaphrodites are infertile, both through aberrant loss of their own sperm and through failure of males to effectively inseminate them; in mammalian eicosanoid signalling, prostaglandin D synthase is required for the c…
(1) Detoxification	48	WBGene00014206	ZK1058.6	nit-1	3.45354	0.286357	-5.79	0.000158	0.0797	NITrilase		none available
(1) Detoxification	61	WBGene00021796	Y52E8A.3	Y52E8A.3	1.21502	0.324794	-2.44	0.0343	0.768	not known	thioredoxin domain	none available
(1) Detoxification	71	WBGene00001761	T26C5.1	gst-13	16.6825	0.352446	-5.46	0.000252	0.106	Glutathione S-Transferase		none available
(1) Detoxification	107	WBGene00010705	K09A11.2	cyp-14A1	2.83253	0.428054	-3.26	0.00822	0.515	CYtochrome P450 family		cyp-14A1 encodes one of ~80 C. elegans cytochrome P450s: membrane-associated, heme-containing NADPH-dependent monooxygenases that catalyze the oxidative metabolism of a variety of exogenous compounds and endogenous substrates.
(1) Detoxification	144	WBGene00010759	K10H10.2	cysl-2	16.9461	0.496169	-5.11	0.000422	0.141	CYsteine Synthase Like		cysl-2 encodes a homolog of sulfhydrylases/cysteine synthases.
(1) Detoxification	148	WBGene00007533	C12C8.2a	cbl-1	20.9168	0.502873	-6.24	8.52e-05	0.0537	Cystathionine Beta Lyase		cbl-1 encodes a putative cystathionine gamma-lyase orthologous to human CTH (OMIM:607657, mutated in cystathioninuria), and paralogous to CTH-1 and CTH-2; CBL-1, unlike its paralog CTH-2, does not inhibit DHC-1 in vivo.
(1) Detoxification	205	WBGene00015479	C05D10.3	wht-1	4.04217	0.575178	-3.39	0.00668	0.476	WHiTe (Drosophila) related ABC transporter		C05D10.3 encodes an ATP-binding cassette (ABC) transporter; C05D10.3 activity is required for efficient RNA interference (RNAi) of a germline-expressed target, pop-1.
(1) Detoxification	211	WBGene00001786	F35E8.8	gst-38	4.51015	0.585293	-2.74	0.0204	0.702	Glutathione S-Transferase		gst-38 encodes a glutathione-S-transferase; gst-38 is predicted to function as a phase II detoxification enzyme and its expression is altered in response to stress; a GST-38::GFP reporter is expressed in the intestine.
(1) Detoxification	231	WBGene00007254	C01H6.4	C01H6.4	4.44296	0.604829	-3.41	0.00644	0.469	not known	flavin monooxygenase	none available
(1) Detoxification	292	WBGene00018146	F37C4.6a	F37C4.6	9.89294	0.668682	-4.17	0.00181	0.262	not known	flavin monooxygenase	none available
(2) Lipid metabolism	6	WBGene00017154	F01E11.1	ugt-57	1.76925	0.0743115	-5.1	0.000425	0.141	UDP-GlucuronosylTransferase		none available
(2) Lipid metabolism	19	WBGene00017937	F30H5.3	F30H5.3	6.60492	0.166174	-4.43	0.0012	0.21	not known	short-chain dehydrogenase	none available
(2) Lipid metabolism	25	WBGene00020016	R11G11.14	lipl-3	1.18391	0.180392	-4.37	0.00131	0.217	LIPase Like		none available
(2) Lipid metabolism	32	WBGene00013101	Y51H4A.5	Y51H4A.5	1.70301	0.224413	-6.32	7.66e-05	0.0508	not known	lipase	none available
(2) Lipid metabolism	42	WBGene00002260	T22G5.6	lbp-8	0.822283	0.253065	-2.46	0.0333	0.762	Lipid Binding Protein		lpb-8 belongs to a family of small intracellular fatty acid binding proteins (FABPs) that includes As-p18, found in the parasitic nematode Ascaris suum; lpb-8 shares 55% identity with bovine heart FABP but only 25% identity with As-p18 and lacks a secretory signal
(2) Lipid metabolism	70	WBGene00008334	C55A6.5	sdz-8	1.61139	0.351298	-6.71	4.65e-05	0.0484	SKN-1 Dependent Zygotic transcript	short-chain dehydrogenase	none available
(2) Lipid metabolism	72	WBGene00001841	C36B7.7	hen-1	1.79909	0.35328	-3.67	0.00415	0.411	HEsitatioN behavior		hen-1 encodes a secreted protein that contains a low-density lipoprotein (LDL) receptor motif A; HEN-1 activity is required for integration of sensory stimuli and behavioral plasticity; a hen-1::GFP reporter is expressed in pharyngeal muscles, the vulva, and weakly in a subset of neurons; antibodies to HEN-1 protein detect expression exclusively in the AIY and ASE neurons, where HEN-1 appears to …
(2) Lipid metabolism	88	WBGene00008779	F14B4.1	F14B4.1	4.81437	0.376667	-4.7	0.000786	0.17	not known	low-density lipoprotein receptor	none available
(2) Lipid metabolism	89	WBGene00011725	T12A7.4a	lips-5	2.56329	0.380412	-3.35	0.00705	0.495	LIPaSe related		none available
(2) Lipid metabolism	91	WBGene00011321	T01C3.4	fil-1	1.23919	0.385117	-3.71	0.00384	0.4	Fasting Induced Lipase		none available
(2) Lipid metabolism	102	WBGene00012324	W07A12.7	rhy-1	5.84907	0.416088	-3.58	0.00478	0.415	Regulator of HYpoxia-inducible factor (hif-1)	acyltransferase	none available
(2) Lipid metabolism	103	WBGene00019232	H23N18.1	ugt-13	5.32558	0.417089	-3.21	0.00897	0.543	UDP-GlucuronosylTransferase		none available
(2) Lipid metabolism	104	WBGene00019233	H23N18.2	ugt-14	0.774558	0.42186	-2.45	0.0338	0.766	UDP-GlucuronosylTransferase		none available
(2) Lipid metabolism	109	WBGene00019580	K09E10.2a	oac-58	1.05235	0.43322	-3.01	0.0127	0.605	O-ACyltransferase homolog		none available
(2) Lipid metabolism	114	WBGene00018984	F56F10.1	F56F10.1	25.489	0.440474	-6.48	6.24e-05	0.0484	not known		F56F10.1 encodes a predicted carboxypeptidase.
(2) Lipid metabolism	121	WBGene00006416	T13A10.11a	sams-5	2.19525	0.456144	-2.83	0.0174	0.676	S-Adenosyl Methionine Synthetase		none available
(2) Lipid metabolism	128	WBGene00007691	C23H4.2	C23H4.2	2.12561	0.471404	-2.87	0.0162	0.647	not known	carboxylesterase	none available
(2) Lipid metabolism	137	WBGene00004092	F44C4.5	ppt-1	2.51591	0.484051	-3.35	0.00713	0.495	Palmitoyl Protein Thioesterase		ppt-1 encodes the C. elegans palmitoyl protein thioesterase-1 ortholog; by homology PPT-1 is predicted to function in degradation of palmitoylated proteins and ppt-1 mutations result in loss of enzymatic activity from mixed-stage extracts; in C. elegans, ppt-1 activity is essential for mitochondrial organization and biogenesis in neuronal and muscle cells, as well as for proper timing of the onse…
(2) Lipid metabolism	155	WBGene00001099	K02D7.4	dsc-4	60.9717	0.515391	-2.92	0.0148	0.629	Defecation Suppressor of Clk-1		dsc-4 encodes the C. elegans ortholog of the large subunit of the microsomal triglyceride transfer protein; dsc-4 affects the length of the defecation cycle and genetically interacts with clk-1 with respect to defecation cycle length, and also with respect to the clk-1- dependent adjustment of defecation cycle length to temperature; a DSC-4::GFP fusion protein is expressed in the intestine beginn…
(2) Lipid metabolism	156	WBGene00015965	C18C4.3	ugt-48	4.24159	0.516144	-3.94	0.00263	0.345	UDP-GlucuronosylTransferase		none available
(2) Lipid metabolism	168	WBGene00008205	C49F5.1	sams-1	88.3951	0.535873	-2.68	0.0227	0.729	S-Adenosyl Methionine Synthetase		sams-1 encodes an S-adenosyl methionine synthetase; by homology, SAMS-1 is predicted to function as a methyl-group donor in many biochemical reactions; sams-1 expression levels are negatively regulated by dietary restriction (as seen in eat-2 mutant animals), suggesting that increased lifespan due to dietary restriction is due, in part, to reducing the activity of key metabolic enzymes; loss of s…
(2) Lipid metabolism	172	WBGene00007833	C31A11.5	oac-6	7.82892	0.540197	-2.26	0.0465	0.819	O-ACyltransferase homolog	acyltransferase	none available
(2) Lipid metabolism	179	WBGene00015141	B0310.5	ugt-46	19.4227	0.54743	-3.77	0.00352	0.389	UDP-GlucuronosylTransferase		none available
(2) Lipid metabolism	193	WBGene00019477	K07C11.4	K07C11.4	6.4014	0.56414	-5.37	0.000289	0.114	not known	carboxylesterase	none available
(2) Lipid metabolism	244	WBGene00013904	ZC455.4	ugt-6	4.31544	0.620891	-2.31	0.0426	0.798	UDP-GlucuronosylTransferase		none available
(2) Lipid metabolism	249	WBGene00008485	F01D4.1a	ugt-43	3.87567	0.624021	-2.44	0.034	0.768	UDP-GlucuronosylTransferase		none available
(2) Lipid metabolism	258	WBGene00008451	E01G6.3	E01G6.3	1.58043	0.634019	-2.36	0.0393	0.792	not known	carboxylesterase	none available
(2) Lipid metabolism	265	WBGene00017515	F16F9.4	F16F9.4	3.48659	0.6448	-2.5	0.031	0.743	not known	lipase	none available
(2) Lipid metabolism	270	WBGene00001244	F41H10.8	elo-6	145.324	0.651996	-2.35	0.0402	0.795	fatty acid ELOngation		The elo-6 gene encodes a paralog of elo-1 and elo-2, each of which encodes a polyunsaturated fatty acid (PUFA) elongase; ELO-6 may be required for a normally high growth rate.
(2) Lipid metabolism	272	WBGene00022683	ZK185.3	ZK185.3	3.90885	0.653448	-2.63	0.0248	0.743	not known	acyl-CoA N-acyltransferase	none available
(2) Lipid metabolism	273	WBGene00004235	Y65B4BR.3	ptr-21	39.3731	0.65358	-2.92	0.0148	0.629	PaTched Related family	sterol-sensing domain of SREBP cleavage	ptr-21 encodes a nematode-specific member of the sterol sensing domain (SSD) proteins, distantly paralogous to Drosophila PATCHED (PTC) and human PTCH (OMIM:601309, mutated in basal cell nevus syndrome); PTR-21 is weakly required for normal molting from L4 to adult stages; PTR-21 is also required for normal growth to full size and locomotion.
(2) Lipid metabolism	285	WBGene00003561	F02E8.6	ncr-1	8.0333	0.65979	-2.41	0.0359	0.778	NPC1 (human Niemann Pick C disease) Related	sterol-sensing domain of SREBP cleavage	ncr-1 encodes a large transmembrane glycoprotein with a patched-like domain that is orthologous to human NPC1; NCR-1 and NPC1 are eukaryotic members of the resistance-nodulation-division (RND) family of membrane permeases, and have a putative sterol-sensing domain; by homology, NCR-1 is predicted to function in intracellular cholesterol and glycolipid trafficking; in C. elegans, NCR-1 is required…
(3) Proteasome	224	WBGene00003922	C15H11.7	pas-1	94.6851	0.596911	-4.72	0.000761	0.17	Proteasome Alpha Subunit		pas-1 encodes a type 6 alpha subunit of the 26S proteasome's 20S protease core particle (CP); PAS-1 is required for embryonic development and by homology, is predicted to comprise the outer rings of the proteasome and to play a role in selective degradation of ubiquitinated proteins during development; in vitro, PAS-1 interacts with VET-1, a coiled-coil domain-containing protein expressed in the …
(3) Proteasome	271	WBGene00004506	Y49E10.1	rpt-6	95.3416	0.652432	-4.4	0.00126	0.215	proteasome Regulatory Particle, ATPase-like		rpt-6 encodes a triple A ATPase that is a subunit of the 26S proteasome 19S regulatory particle (RP) base subcomplex; RPT-6 is required for embryonic and larval development and by homology, is predicted to function in unfolding protein substrates and translocating them into the core proteolytic particle (CP) of the proteasome.
(3) Proteasome	282	WBGene00004501	C52E4.4	rpt-1	183.048	0.658649	-3.9	0.00281	0.355	proteasome Regulatory Particle, ATPase-like		rpt-1 encodes a predicted ATPase subunit of the 19S regulatory complex of the proteasome that affects fertility and embryonic viability.
(3) Proteasome	290	WBGene00004461	F10G7.8	rpn-5	135.943	0.666052	-3.44	0.00609	0.469	proteasome Regulatory Particle, Non-ATPase-like		none available
(3) Proteasome	291	WBGene00004463	F49C12.8	rpn-7	161.649	0.667966	-3.54	0.0051	0.426	proteasome Regulatory Particle, Non-ATPase-like		rpn-7 is predicted to encode a non-ATPase subunit of the 19S regulatory complex of the proteasome that affects fertility and embryonic viability.
(4) ECM	16	WBGene00019619	K10C2.3	asp-14	22.2125	0.144272	-8.08	9.1e-06	0.0297	ASpartyl Protease	aspartyl protease	asp-14 encodes an aspartyl protease.
(4) ECM	55	WBGene00000252	F59E12.12	bli-2	0.3844	0.306639	-2.88	0.016	0.644	BLIstered cuticle		A cuticle collagen involved in strut assembly in the adult cuticle.
(4) ECM	66	WBGene00004397	T01B7.7	rol-6	0.335503	0.338321	-2.4	0.0366	0.778	ROLler: helically twisted, animals roll when moving		The rol-6 gene encodes a cuticle collagen related to human collagen alpha 1 (III) chain precursor (OMIM:120180), and is required for normal cuticular morphology; ROL-6 interacts with SQT-1, a closely related cuticle collagen, and is expressed at all stages from L2 to adult with transcripts detected at each of the molts preceding these stages.
(5) Transcription	13	WBGene00013583	Y80D3A.3	ceh-51	1.24639	0.137617	-2.8	0.0182	0.683	C. Elegans Homeobox		ceh-51 encodes a homeodomain transcription factor most closely related to those of NK-2 subfamily proteins containing multiple serine residues in the N-terminus; ceh-51 is expressed in the early MS lineage downstream of TBX-35; TBX-35 directly activates ceh-51 and TBX-35 is sufficient, but not necessary, for ceh-51 activation; activation of ceh-51 in a tbx-35 mutant background is POP-1-dependent;…
(5) Transcription	45	WBGene00002601	F26B1.7	let-381	0.957061	0.26899	-2.31	0.0426	0.798	LEThal		let-381 encodes a forkhead transcription factor and was identified in a screen for essential genes; let-381 is essential for development at different times as mutants exhibit embryonic and early larval lethality, with a few developing to sterile adults; inactivation of let-381 using RNA interference results in adults with mesodermal cell lineage defects and a reduced number of coelomocytes; repor…
(5) Transcription	90	WBGene00004013	F38A6.1a	pha-4	8.29448	0.380436	-7.79	1.27e-05	0.0297	defective PHArynx development		pha-4 encodes a FoxA transcription factor; during embryonic development, PHA-4 functions as an organ identity gene whose activity is necessary and sufficient for development of the pharynx/foregut; in addition, PHA-4 plays a key role in regulation of diet-restriction-induced longevity in adult animals; PHA-4 expression begins early in embryogenesis and is seen in pharyngeal and intestinal cells (…
(5) Transcription	133	WBGene00044330	R08B4.2	alr-1	1.97887	0.479726	-2.59	0.0266	0.743	AristaLess (Drosophila homeodomain) Related		alr-1 encodes a homeodomain transcription factor orthologous to aristaless/human Arx; alr-1 regulates the development of sensory neurons in the head and GABAergic motor neurons; ALR-1 affects touch receptor neuron (TRN) fate by acting as a transcriptional activator and is required selectively for TRN gene expression; alr-1 expression in TRNs depends on MEC-3; ALR-1 ensures TRN differentiation by …
(5) Transcription	251	WBGene00016975	C56E10.1	nhr-173	2.92358	0.626055	-2.28	0.0452	0.818	Nuclear Hormone Receptor family		none available
(5) Transcription	257	WBGene00016865	C52B9.2a	ets-9	2.47613	0.633979	-2.38	0.0379	0.78	ETS class transcription factor		none available
(5) Transcription	263	WBGene00006652	Y113G7A.6a	ttx-1	2.54422	0.640608	-2.5	0.0308	0.743	abnormal ThermoTaXis		ttx-1 encodes a homeodomain protein that is a member of the OTD/OTX subclass of homeodomain transcription factors; ttx-1 is expressed at higher levels in the AFD thermosensory neurons as compared to the AWB olfactory neurons and is necessary and partly sufficient for specification of the AFD thermosensory neuron fate and thus for proper AFD-mediated thermosensory behavior and normal expression of…
(5) Transcription	268	WBGene00018265	F41B5.9	nhr-182	3.31129	0.649234	-4.01	0.00235	0.315	Nuclear Hormone Receptor family		none available
(5) Transcription	283	WBGene00009532	F38B7.1a	ccch-1	20.4798	0.65927	-2.53	0.0294	0.743	CCCH-type zinc finger putative transcription factor	zinc finger, CCCH	ccch-1 encodes a CCCH tandem zinc finger (TZF) protein; based upon its sequence similarity to human tristetraprolin and ERF-2 the product of F38B7.1 is predicted to function as an RNA-binding protein that specifically binds to UAUU repeats.
(6) Receptor	18	WBGene00016748	C48C5.3	aexr-3	0.422782	0.162677	-5.84	0.000148	0.0796	AEX-2 related neuropeptide Receptor		none available
(6) Receptor	33	WBGene00020008	R11F4.2a	R11F4.2	0.303911	0.226306	-3.81	0.00329	0.377	not known	G-protein-coupled receptor	none available
(6) Receptor	35	WBGene00021178	Y9C9A.8	Y9C9A.8	0.699205	0.234674	-4.02	0.0023	0.311	not known	G-protein-coupled receptor	none available
(6) Receptor	37	WBGene00005092	B0547.3	srd-14	1.49737	0.239677	-4.48	0.00111	0.202	Serpentine Receptor, class D (delta)		none available
(6) Receptor	53	WBGene00000059	R06A4.10a	acr-20	0.462444	0.299708	-2.43	0.0351	0.777	AcetylCholine Receptor		acr-20 encodes an alpha 7-like homomer-forming subunit of the nicotinic acetylcholine receptor (nAChR) superfamily which encode ligand-gated ion channels that regulate fast action of acetylcholine at neuromuscular junctions and in the nervous system; ACR-20 is a member of the DEG-3-like group of nAChR subunits which appears to be unique to nematodes.
(6) Receptor	63	WBGene00012028	T25E12.13	srz-99	0.386958	0.33056	-2.51	0.0301	0.743	Serpentine Receptor, class Z		none available
(6) Receptor	68	WBGene00007664	C18B12.2	seb-3	0.898131	0.34046	-3.07	0.0115	0.593	SEcretin/class B GPCR		C18B12.2 encodes a G-protein-coupled receptor (GPCR) that is a member of the secretin family (also known as family B or family 2) of GPCRs.
(6) Receptor	75	WBGene00006895	T17A3.8	ver-2	1.52453	0.356884	-3.26	0.00833	0.517	VEGF (vascular endothelial growth factor) Receptor family		none available
(6) Receptor	84	WBGene00004776	F59C12.2a	ser-1	1.27392	0.369895	-2.33	0.0411	0.798	SERotonin/octopamine receptor family		ser-1 encodes a putative ortholog of mammalian 5-HT2 metabotropic serotonin receptors; SER-1 is required in both vulval muscle and neurons for the stimulation of egg-laying by serotonin (5-HT), but is completely dispensable for stimulation by the uptake inhibitor fluoxetine, and mostly dispensable for stimulation by the tricyclic antidepressant imipramine; SER-1 and SER-7 are redundantly required…
(6) Receptor	92	WBGene00015299	C01F1.4	C01F1.4	1.1721	0.385982	-2.23	0.0492	0.834	not known	G-protein-coupled receptor	none available
(6) Receptor	106	WBGene00017176	F02E8.2a	nmur-3	0.466476	0.427897	-3.01	0.0127	0.605	NMUR (NeuroMedin U Receptor) homolog	G-protein-coupled receptor	none available
(6) Receptor	143	WBGene00020086	R106.2	npr-24	0.672754	0.495449	-2.29	0.0445	0.814	NeuroPeptide Receptor family		none available
(6) Receptor	170	WBGene00008369	D1053.4	D1053.4	1.23881	0.53683	-2.77	0.0192	0.691	not known	TGF-beta/activin receptor	none available
(7) Channel/Transporter	8	WBGene00022641	ZK6.6a	ZK6.6	0.618563	0.11198	-8.13	8.67e-06	0.0297	not known	major facilitator superfamily; transporter	none available
(7) Channel/Transporter	31	WBGene00016063	C24G7.1	delm-2	0.572154	0.223564	-2.37	0.0385	0.787	DEgenerin Linked to Mechanosensation	degenerin; sodium channel	none available
(7) Channel/Transporter	38	WBGene00002128	C36H8.2	inx-6	1.05223	0.247008	-2.54	0.0287	0.743	INneXin		inx-6 encodes an innexin, an integral transmembrane channel protein that is a structural component of invertebrate gap junctions; INX-6 is required for formation of pharyngeal gap junctions and thus for the electrical coupling and synchronous muscle contractions necessary for normal feeding behavior and postembryonic development; INX-6 may function redundantly with EAT-5, another C. elegans innex…
(7) Channel/Transporter	40	WBGene00017806	F26A1.8	F26A1.8	0.647075	0.251365	-3.05	0.0119	0.593	not known	sulfite exporter; TauE/SafE	none available
(7) Channel/Transporter	51	WBGene00016064	C24G7.2	acd-1	1.98781	0.294782	-2.29	0.0444	0.814	ACid-sensitive Degenerin	degenerin; sodium channel	none available
(7) Channel/Transporter	57	WBGene00022283	Y74E4A.1a	lgc-27	1.46431	0.314463	-2.44	0.0344	0.77	Ligand-Gated ion Channel		none available
(7) Channel/Transporter	58	WBGene00017944	F31D5.1	F31D5.1	0.358386	0.31448	-3.06	0.0117	0.593	not known	major facilitator superfamily; transporter	none available
(7) Channel/Transporter	59	WBGene00019069	F58H7.3	lgc-30	1.21818	0.321758	-2.8	0.0183	0.684	Ligand-Gated ion Channel		none available
(7) Channel/Transporter	69	WBGene00022682	ZK185.2	ZK185.2	1.30149	0.345804	-4.64	0.000864	0.175	not known	magnesium transporter	ZK185.2 encodes an ortholog of human SLC41A1, SLC41A2, SLC41A3 and bacterial MgtE; based on orthology, ZK185.2 is predicted to transport Mg(2+) into cells; ZK185.2 is paralogous to K07H8.2 and ZK1053.6.
(7) Channel/Transporter	74	WBGene00019547	K09C4.1a	K09C4.1	2.16737	0.356519	-4.86	0.000612	0.157	not known	sugar transporter	none available
(7) Channel/Transporter	81	WBGene00019674	K12C11.3a	K12C11.3	1.55316	0.366639	-4.43	0.00119	0.21	not known	copper transporter	none available
(7) Channel/Transporter	110	WBGene00010789	K12G11.2	sulp-5	0.770612	0.435388	-2.39	0.0372	0.778	SULfate Permease family		sulp-5 encodes one of eight C. elegans members of the sulfate permease family of anion transporters; by homology, SULP-5 is predicted to function as an anion transporter that regulates cellular pH and volume via transmembrane movement of electrolytes and fluids; a SULP-5::GFP fusion is expressed in punctate structures irregularly distributed along the apical membrane of excretory cell canals and …
(7) Channel/Transporter	117	WBGene00013746	Y113G7A.5	lgc-55	0.796142	0.44567	-2.24	0.0487	0.833	Ligand-Gated ion Channel		lgc-55 encodes an amine-gated chloride channel; LGC-55 activity is required for backward locomotion and suppression of lateral head oscillations in response to anterior touch; LGC-55 is expressed in neurons and muscles that receive synaptic input from tyraminergic neurons, and localizes to the neuronal cell body and regions suggestive of postsynaptic specializations; when expressed in Xenopus ooc…
(7) Channel/Transporter	122	WBGene00010214	F57G8.5	F57G8.5	1.33281	0.457539	-4.09	0.00205	0.29	not known	sodium/hydrogen ion exchanger	none available
(7) Channel/Transporter	157	WBGene00000950	C47C12.6	deg-1	1.14933	0.519256	-4.81	0.000657	0.157	DEGeneration of certain neurons		deg-1 encodes a putative ion channel for which altered function induces necrotic cell death of neurons required for mechanosensory behavior; expressed in the ASH, IL1, AVD, AVG, and PVC neurons in addition to some muscle cells.
(7) Channel/Transporter	161	WBGene00008033	C39E9.10	spin-2	1.93283	0.526098	-2.71	0.0216	0.724	SPINster (Drosophila lysosomal permease) homolog	major facilitator superfamily; sugar transporter	none available
(7) Channel/Transporter	162	WBGene00006832	C41C4.5a	unc-105	1.62659	0.526427	-2.36	0.0392	0.792	UNCoordinated		unc-105 encodes a muscle degenerin, a mechanosensory membrane channel that is a member of the degenerin ion channel superfamily and similar to subunits of the mammalian amiloride-sensitive epithelial sodium channel (ENaC, OMIM:600761); UNC-105 is required for normal growth and for normal contraction and organization of muscle, where it is expressed; UNC-105 interacts with LET-2, an alpha2 chain o…
(7) Channel/Transporter	171	WBGene00008598	F09A5.1	spin-3	3.10699	0.53872	-3.02	0.0125	0.605	SPINster (Drosophila lysosomal permease) homolog	major facilitator superfamily; sugar transporter	none available
(7) Channel/Transporter	177	WBGene00012280	W05E10.1	W05E10.1	2.4389	0.546165	-2.25	0.0475	0.824	not known	major facilitator superfamily; transporter	none available
(7) Channel/Transporter	178	WBGene00009929	F52D10.1	abts-2	1.63394	0.546186	-2.66	0.0234	0.73	Anion/Bicarbonate TranSporter family		abts-2 encodes an anion transporter; when expressed in Xenopus oocytes, ABTS-2 does not exhibit detectable transport of chloride, sulfate, or oxolate anions; ABTS-2::GFP fusion proteins are expressed in the larval excretory cell and the adult ovaries, while an abts-2::gfp promoter fusion is seen in only one tail ganglion neuron; in intestinal cells, the ABTS-2::GFP fusion protein localizes to the…
(7) Channel/Transporter	181	WBGene00008793	F14D7.6a	F14D7.6	3.40918	0.550517	-3.58	0.00478	0.415	not known	major facilitator superfamily; transporter	none available
(7) Channel/Transporter	191	WBGene00006678	M04B2.5a	twk-25	1.90531	0.561783	-2.48	0.032	0.75	TWiK family of potassium channels		none available
(7) Channel/Transporter	196	WBGene00006671	C44E12.3a	twk-17	1.07343	0.567444	-2.23	0.0494	0.837	TWiK family of potassium channels		none available
(7) Channel/Transporter	200	WBGene00019904	R05G9.2a	twk-49	1.94169	0.56976	-3.33	0.00731	0.495	TWiK family of potassium channels		none available
(7) Channel/Transporter	208	WBGene00021948	Y55F3C.3a	kvs-5	3.7029	0.583691	-2.26	0.047	0.822	K (potassium) Voltage-Sensitive channel subunit		none available
(7) Channel/Transporter	213	WBGene00001135	ZK512.6a	eat-4	1.15991	0.589939	-2.51	0.0303	0.743	EATing: abnormal pharyngeal pumping		eat-4 encodes an ortholog of the mammalian BNPI vesicular glutamate transporter that affects chemotaxis, feeding, foraging and thermotaxis; eat-4 is expressed in specific neurons, including M3L and M3R which are known to be glutamatergic.
(7) Channel/Transporter	215	WBGene00007947	C35A5.3	C35A5.3	9.64732	0.590397	-2.75	0.0199	0.697	not known	major facilitator superfamily; transporter	none available
(7) Channel/Transporter	226	WBGene00019803	PDB1.1a	PDB1.1	8.31471	0.599489	-2.48	0.0321	0.751	not known	cation efflux protein	none available
(7) Channel/Transporter	228	WBGene00012699	Y39B6A.41	Y39B6A.41	1.87457	0.600812	-3.19	0.00926	0.553	not known	major facilitator superfamily; sugar transporter	none available
(7) Channel/Transporter	232	WBGene00007388	C06H2.4	folt-1	1.93489	0.606909	-2.33	0.0416	0.798	FOLate Transporter family		folt-1 encodes a folate transporter required for folate uptake; FOLT-1 is orthologous to the human folate transporter, SLC19A3 (Solute Carrier Family 19 (thiamine transporter), Member 3); folt-1 is required for proper germline function, oogenesis and sperm number in males, and for normal life-span; folt-1 mutants and folt-1(RNAi) animals show significantly lowered folate uptake; heterologously ex…
(7) Channel/Transporter	239	WBGene00020490	T13G4.3	tmc-1	2.09838	0.615273	-2.39	0.0373	0.778	TMC (TransMembrane Channel-like protein) family		tmc-1 encodes a multipass transmembrane protein; TMC-1 functions specifically as a sodium-sensitive channel that is required for salt taste chemosensation in the ASH neurons and for high salt avoidance behavior; when expressed in other neurons, TMC-1 is sufficient to generate a salt response in vivo, and when expressed in mammalian cells, TMC-1 generates a predominantly cationic current activated…
(7) Channel/Transporter	240	WBGene00000529	B0491.8a	clh-2	1.0837	0.616498	-2.62	0.0253	0.743	CLC-type chloride cHannel		clh-2 encodes a chloride channel protein that is required for embryonic viability; may have two transcripts transcribed from alternative promoters, and the two transcripts might be expressed in different cell types.
(7) Channel/Transporter	267	WBGene00015381	C03B1.13	C03B1.13	4.51877	0.645651	-2.31	0.0425	0.798	not known	sugar transporter	none available
(7) Channel/Transporter	280	WBGene00011718	T11G6.3	T11G6.3	3.81722	0.658089	-2.76	0.0195	0.695	not known	major facilitator superfamily; transporter	none available
(7) Channel/Transporter	284	WBGene00007550	C13C4.6	C13C4.6	1.67224	0.65964	-2.7	0.0218	0.726	not known		none available
(7) Channel/Transporter	295	WBGene00020445	T12B3.2	T12B3.2	5.75733	0.669178	-2.47	0.0327	0.757	not known	major facilitator superfamily; sugar transporter	none available
(8) Other	1	WBGene00007875	C32H11.12	dod-24	28.0906	0.0304745	-7.24	2.41e-05	0.0337	Downstream Of DAF-16 (regulated by DAF-16)	CUB-like domain	none available
(8) Other	2	WBGene00011175	R09E10.5	R09E10.5	5.1437	0.0315952	-4.95	0.000535	0.15	not known	AMOP domain	none available
(8) Other	3	WBGene00004155	W01C9.3a	pqn-73	2.25578	0.0413694	-10.9	5.81e-07	0.00732	Prion-like-(Q/N-rich)-domain-bearing protein		The protein product of this gene is predicted to contain a glutamine/asparagine (Q/N)-rich ('prion') domain, by the algorithm of Michelitsch and Weissman (as of the WS77 release of WormBase, i.e., in wormpep77).
(8) Other	4	WBGene00018640	F49E10.2a	F49E10.2	0.737525	0.066662	-4.32	0.00143	0.224	not known	carotenoid oxygenase	none available
(8) Other	5	WBGene00019839	R02F11.1	R02F11.1	0.92013	0.0725003	-4.85	0.000625	0.157	not known		none available
(8) Other	7	WBGene00008493	F01D5.2	F01D5.2	2.57341	0.099335	-3.62	0.00447	0.411	not known		none available
(8) Other	9	WBGene00016577	C41H7.7	clec-3	0.437317	0.112424	-5.63	0.000197	0.0886	C-type LECtin		none available
(8) Other	10	WBGene00007867	C32H11.4	C32H11.4	8.85114	0.112634	-5.33	0.000303	0.116	not known	CUB-like domain	none available
(8) Other	12	WBGene00007687	C18E9.7	C18E9.7	0.941711	0.13487	-4.81	0.000659	0.157	not known		none available
(8) Other	14	WBGene00016106	C25F6.7a	C25F6.7	0.942075	0.139559	-3.75	0.00358	0.39	not known		none available
(8) Other	15	WBGene00008988	F20G2.5	F20G2.5	1.63095	0.142529	-2.61	0.0253	0.743	not known	CUB-like domain	none available
(8) Other	17	WBGene00006642	F01E11.4	tsp-16	0.959222	0.152918	-3.89	0.00288	0.358	TetraSPanin family		none available
(8) Other	20	WBGene00022237	Y73B6BL.14	Y73B6BL.14	1.2775	0.167176	-7.69	1.41e-05	0.0297	not known	DNA ligase	none available
(8) Other	21	WBGene00010189	F57B1.6a	F57B1.6	1.42741	0.169648	-5.76	0.000165	0.0801	not known		none available
(8) Other	22	WBGene00010573	K04H4.2a	K04H4.2	5.21381	0.174738	-4.84	0.000632	0.157	not known		K04H4.2 encodes, by alternative splicing, three proteins ranging from 628 to 1446 residues in length; K04H4.2 proteins are predicted to be secreted, with an N-terminal chitin-binding peritrophin-A domain followed by up to 15 cysteine-rich domains; the general organization of K04H4.2 protein resembles that of T10E10.4; in mass RNAi assays, K04H4.2 is required for larval growth and locomotion; K04H…
(8) Other	24	WBGene00219770	Y82E9BL.20	linc-40	0.774321	0.178993	-4.11	0.00198	0.283	Long Intervening Non-Coding RNA		none available
(8) Other	26	WBGene00007247	C01G12.7	C01G12.7	0.494126	0.190204	-4.71	0.000767	0.17	not known		none available
(8) Other	27	WBGene00017703	F22E5.1	F22E5.1	3.36696	0.203299	-3.48	0.00573	0.457	not known		none available
(8) Other	28	WBGene00007154	B0365.7	dhc-3	0.66606	0.213203	-3.57	0.00487	0.418	Dynein Heavy Chain		none available
(8) Other	29	WBGene00010123	F55G11.2	F55G11.2	1.90545	0.215865	-3.61	0.0046	0.411	not known		F55G11.2 encodes a protein containing a CUB (complement C1r/C1s, Uegf, Bmp1)-like domain; F55G11.2 expression is upregulated in response to infection with the human bacterial pathogen Pseudomonas aeruginosa; F55G11.2 expression is regulated by the ELT-2 GATA transcription factor.
(8) Other	30	WBGene00016942	C55B7.3	C55B7.3	1.26298	0.216748	-2.26	0.0465	0.819	not known	phosphatase	none available
(8) Other	34	WBGene00220093	T25C12.11	T25C12.11	0.91712	0.233122	-4.53	0.00103	0.196	not known	non-coding RNA	none available
(8) Other	39	WBGene00019215	H20E11.3a	H20E11.3	2.88755	0.248987	-3.07	0.0116	0.593	not known	CUB-like domain	none available
(8) Other	41	WBGene00017326	F10C1.5	dmd-5	1.36941	0.251385	-6.44	6.57e-05	0.0484	DM (Doublesex/MAB-3) Domain family		none available
(8) Other	43	WBGene00009573	F40E10.5	F40E10.5	0.43643	0.258244	-2.66	0.0234	0.73	not known		none available
(8) Other	44	WBGene00022161	Y71G12B.26a	Y71G12B.26	0.823589	0.265435	-2.6	0.0261	0.743	not known		none available
(8) Other	46	WBGene00020703	T22F7.4	T22F7.4	1.78927	0.271411	-2.97	0.0136	0.619	not known		none available
(8) Other	47	WBGene00015094	B0261.6a	B0261.6	0.525276	0.282909	-2.33	0.0414	0.798	not known		none available
(8) Other	49	WBGene00010745	K10D11.1	dod-17	5.85849	0.288242	-2.35	0.0397	0.795	Downstream Of DAF-16 (regulated by DAF-16)	CUB-like domain	none available
(8) Other	50	WBGene00008494	F01D5.3	F01D5.3	4.10553	0.292301	-3.3	0.00777	0.515	not known		none available
(8) Other	52	WBGene00017092	E02C12.6	E02C12.6	1.01223	0.296737	-6.46	6.4e-05	0.0484	not known	fructosamine kinase	none available
(8) Other	54	WBGene00006456	F46F11.3	tag-83	0.522626	0.303824	-3.54	0.00511	0.426	Temporarily Assigned Gene name		none available
(8) Other	56	WBGene00018256	F41A4.1	cutl-28	1.72352	0.308901	-2.25	0.0476	0.824	CUTiclin-Like		none available
(8) Other	60	WBGene00002983	C54G7.3a	lgx-1	1.79333	0.322715	-2.51	0.0301	0.743	Lin-12 and Glp-1 X-hybridizing		lgx-1 encodes a polysaccharide deacetylase.
(8) Other	62	WBGene00016734	C46H11.10a	C46H11.10	0.587036	0.32904	-3.42	0.00626	0.469	not known		none available
(8) Other	64	WBGene00009166	F26F2.1	F26F2.1	0.343152	0.33078	-2.66	0.0234	0.73	not known		none available
(8) Other	65	WBGene00018856	F55A4.4	F55A4.4	0.480948	0.331927	-2.34	0.0404	0.795	not known	dsRNA binding motif	none available
(8) Other	67	WBGene00023252	C39H7.2	C39H7.2	1.66631	0.33972	-2.74	0.0203	0.702	not known		none available
(8) Other	73	WBGene00016180	C28C12.4	C28C12.4	1.8704	0.356041	-2.77	0.0193	0.691	not known		none available
(8) Other	76	WBGene00012917	Y46G5A.29	Y46G5A.29	0.867011	0.359875	-2.77	0.0193	0.691	not known	EGF-like	none available
(8) Other	77	WBGene00020631	T20F7.3	T20F7.3	0.315067	0.360307	-2.63	0.0247	0.743	not known	inositol polyphosphate kinase	none available
(8) Other	78	WBGene00013542	Y75B8A.5	lron-12	0.924832	0.361814	-2.22	0.0496	0.838	eLRR (extracellular Leucine-Rich Repeat) ONly		none available
(8) Other	79	WBGene00020106	R151.1	R151.1	1.04903	0.361816	-3.46	0.0059	0.464	not known		none available
(8) Other	80	WBGene00000401	F59C12.1	cdh-9	1.53128	0.364361	-3.3	0.00777	0.515	CaDHerin family		cdh-9 encodes a member of the cadherin superfamily of transmembrane glycoproteins that mediate homophilic cell-cell adhesion; as loss of CDH-9 activity via RNA-mediated interference (RNAi) does not result in any abnormalities, the precise role of CDH-9 in C. elegans development and/or behavior is not yet known.
(8) Other	82	WBGene00012833	Y43F8C.11	Y43F8C.11	0.377416	0.36723	-2.35	0.0403	0.795	not known		none available
(8) Other	83	WBGene00021865	Y54F10BM.11	fbxa-66	0.653386	0.368345	-2.7	0.022	0.729	F-box A protein		none available
(8) Other	85	WBGene00017215	F07F6.1	F07F6.1	0.605593	0.375042	-2.97	0.0137	0.619	not known	nucleotide binding	none available
(8) Other	86	WBGene00016337	C33C12.5	fbxb-38	1.08504	0.375149	-4.24	0.0016	0.246	F-box B protein		This gene encodes a protein containing an F-box, a motif predicted to mediate protein-protein interactions either with homologs of yeast Skp-1p or with other proteins; its encoded protein also contains a Pfam-B45 motif of presently unknown function.
(8) Other	87	WBGene00000895	B0412.1a	dac-1	0.990912	0.375316	-2.47	0.0324	0.754	DAChsund transcription factor homolog		dac-1 encodes the C. elegans ortholog of Dachshund, a transcriptional regulator first described in Drosophila that is a member of the SKI/SNO/DAC family of proteins; dac-1 is expressed at higher levels in the AFD thermosensory neurons as compared to the AWB olfactory neurons and likely plays a role in thermosensory behavior as on thermal gradients dac-1 mutants fail to suppress cryophilic drive b…
(8) Other	93	WBGene00000397	F08B4.2a	cdh-5	3.43188	0.387492	-3.66	0.00421	0.411	CaDHerin family		a homolog of cadherin.
(8) Other	94	WBGene00003740	T24D8.5	nlp-2	0.785749	0.388775	-2.56	0.028	0.743	Neuropeptide-Like Protein		none available
(8) Other	95	WBGene00013048	Y50E8A.5	Y50E8A.5	1.18761	0.393567	-2.31	0.0425	0.798	not known	gonadotropin	none available
(8) Other	96	WBGene00011899	T21C12.3	T21C12.3	0.61057	0.395784	-3.84	0.0031	0.365	not known		none available
(8) Other	97	WBGene00077692	C08E8.10	C08E8.10	1.58094	0.405326	-2.75	0.0199	0.697	not known		none available
(8) Other	98	WBGene00013802	Y116A8C.25	Y116A8C.25	1.11104	0.406212	-5.87	0.000141	0.0796	not known	phosphotransferase	none available
(8) Other	99	WBGene00007153	B0365.6	clec-41	107.114	0.40877	-2.93	0.0145	0.627	C-type LECtin		none available
(8) Other	100	WBGene00014135	ZK896.4	ZK896.4	2.24537	0.4133	-3.73	0.00372	0.396	not known	CUB-like domain	none available
(8) Other	101	WBGene00016086	C25A11.1	C25A11.1	2.30815	0.415432	-3.2	0.00925	0.553	not known		none available
(8) Other	105	WBGene00020052	R13A5.10	R13A5.10	1.45593	0.426368	-3.01	0.0127	0.605	not known		R13A5.10 encodes a cytidine deaminase; by homology the product of R13A5.10 is predicted to function in deamination of cytidine to uracil; large-scale expression studies indicate that R13A5.10 is expressed in larvae and adults and seen in the excretory cell and the nervous system.
(8) Other	108	WBGene00050943	ZC412.10	ZC412.10	1.0789	0.432428	-2.47	0.0325	0.755	not known		none available
(8) Other	111	WBGene00044241	C53D6.11	C53D6.11	0.853651	0.435788	-2.96	0.014	0.619	not known		none available
(8) Other	112	WBGene00021252	Y22D7AL.14	cht-4	0.954661	0.436804	-3.04	0.0121	0.596	CHiTinase	glycosyl hydrolase	none available
(8) Other	113	WBGene00017022	D1022.3	D1022.3	0.610026	0.436931	-2.39	0.0374	0.778	not known	dienelactone hydrolase	none available
(8) Other	115	WBGene00018055	F35F10.5	F35F10.5	1.60351	0.441279	-2.65	0.0237	0.732	not known		none available
(8) Other	116	WBGene00045252	Y62H9A.15a	Y62H9A.15	1.24651	0.444763	-4.81	0.000662	0.157	not known		none available
(8) Other	118	WBGene00011383	T02E9.5	T02E9.5	9.59433	0.44615	-4.18	0.00178	0.261	not known		none available
(8) Other	119	WBGene00010223	F58A3.3	F58A3.3	1.07948	0.446389	-2.97	0.0138	0.619	not known		none available
(8) Other	120	WBGene00023504	F26F2.8	F26F2.8	1.06716	0.449707	-2.68	0.0227	0.729	not known		none available
(8) Other	123	WBGene00017449	F14B8.7	otpl-3	2.39839	0.458187	-3.39	0.00662	0.474	OToPetrin-Like		otpl-3 encodes an ortholog of otopetrins such as human OTOP1 (OMIM:607806), OTOP2 (OMIM:607827), and OTOP3 (OMIM:607828), along with other homologs in fish and insects (such as crustacean OTOPLb); otopetrins are predicted to have 12 transmembrane helices; by homology with OTOP1 and OTOPLb, OTPL-3 might regulate intracellular calcium fluxes during extracellular stimuli, promote extracellular calci…
(8) Other	124	WBGene00012530	Y32F6A.5a	Y32F6A.5	60.1842	0.460269	-4.96	0.000528	0.15	not known	peptidase	none available
(8) Other	125	WBGene00017071	D2096.3	aagr-1	64.5852	0.463207	-4.71	0.000766	0.17	Acid Alpha Glucosidase Relate		none available
(8) Other	126	WBGene00019752	not known	M03D4.6	1.17916	0.464706	-2.66	0.0232	0.73	not known	Piwi domain	none available
(8) Other	127	WBGene00017001	D1007.3	D1007.3	1.05836	0.464911	-2.28	0.0454	0.818	not known		none available
(8) Other	129	WBGene00077714	R102.11a	R102.11	0.796142	0.473721	-2.51	0.0304	0.743	not known		none available
(8) Other	130	WBGene00015631	C09D1.2	clec-89	0.922267	0.474238	-3.46	0.00586	0.464	C-type LECtin		none available
(8) Other	131	WBGene00004923	Y75B7AL.3	snt-3	1.74843	0.474682	-3.52	0.00528	0.437	SyNapTotagmin		none available
(8) Other	132	WBGene00017168	F01F1.14	F01F1.14	0.274399	0.47914	-2.39	0.0372	0.778	not known		none available
(8) Other	134	WBGene00003957	F23B2.12	pcp-2	9.5262	0.481079	-4.91	0.000568	0.152	Prolyl Carboxy Peptidase like		pcp-2 encodes a prolyl carboxypeptidase.
(8) Other	135	WBGene00007531	C11H1.7a	C11H1.7	1.3171	0.48172	-2.54	0.0288	0.743	not known		none available
(8) Other	136	WBGene00006611	C23H3.7	tre-5	1.94169	0.482751	-3.05	0.012	0.593	TREhalase		none available
(8) Other	138	WBGene00011487	T05E12.6a	T05E12.6	17.0037	0.486691	-2.76	0.0198	0.697	not known	CUB-like domain	none available
(8) Other	139	WBGene00008091	C44F1.1	C44F1.1	3.71986	0.487808	-2.61	0.0255	0.743	not known		none available
(8) Other	140	WBGene00044492	Y54G2A.49a	Y54G2A.49	2.55455	0.489589	-2.59	0.0262	0.743	not known		none available
(8) Other	141	WBGene00018470	F45E4.5a	F45E4.5	1.31443	0.491304	-2.61	0.0255	0.743	not known		none available
(8) Other	142	WBGene00000016	T22H6.5	abf-5	1.58736	0.492159	-2.5	0.031	0.743	AntiBacterial Factor related		The abf-5 gene encodes a homolog of the antibacterial factor ASABF from Ascaris suum.
(8) Other	145	WBGene00009101	F25B3.4	F25B3.4	0.867011	0.499404	-2.4	0.0369	0.778	not known	phosphatase; calcineurin-like phosphoesterase	none available
(8) Other	146	WBGene00013654	Y105C5B.15a	Y105C5B.15	27.768	0.500575	-3.29	0.00786	0.515	not known	phosphatase	none available
(8) Other	147	WBGene00010266	F58G1.4	dct-18	59.5246	0.500645	-2.37	0.0388	0.789	DAF-16/FOXO Controlled, germline Tumor affecting		none available
(8) Other	149	WBGene00014079	ZK792.7a	ZK792.7	2.19019	0.505336	-3.49	0.00559	0.455	not known		none available
(8) Other	150	WBGene00235160	CD4.18	CD4.18	0.620268	0.508765	-2.34	0.0405	0.795	not known		none available
(8) Other	151	WBGene00004507	C18H9.7	rpy-1	2.19231	0.509475	-3.52	0.00535	0.44	RaPsYn		rpy-1 is orthologous to the human gene 43KDA ACETYLCHOLINE RECEPTOR-ASSOCIATED PROTEIN (RAPSN; OMIM:601592), which when mutated leads to congenital myasthenic syndrome.
(8) Other	152	WBGene00017257	F08F1.3	F08F1.3	2.3149	0.509609	-3.4	0.00652	0.469	not known		none available
(8) Other	153	WBGene00004740	T10H9.2	scd-2	1.60084	0.512312	-2.99	0.0132	0.615	Suppressor of Constitutive Dauer formation		scd-2 encodes the homolog of the anaplastic lymphoma kinase (ALK) receptor tyrosine kinase (RTK) (OMIM:105590, involved in the development of non-Hodgkin's lymphoma in humans); the ALK family of receptor tyrosine kinases belong to the insulin receptor superfamily; scd-2 was initially identified in a naturally occuring desert oasis strain of C. elegans that fails to respond to the dauer pheromone …
(8) Other	154	WBGene00011202	R10E4.6	R10E4.6	1.07266	0.512858	-2.94	0.0145	0.627	not known		none available
(8) Other	158	WBGene00003096	C02A12.4	lys-7	62.7952	0.520461	-2.25	0.0479	0.827	LYSozyme		lys-7 encodes an enzyme homologous to an antimicrobial lysozyme encoded by the LYS4 gene of the protozoan parasite Entamoeba histolytica; LYS-7 functions in the innate immune response as an antimicrobial enzyme that, by homology, hydrolyzes the 1,4-beta-linkages between N-acetyl-D-glucosamine and N-acetylmuramic acid in peptidoglycan heteropolymers of prokaryotic cell walls; loss of lys-7 activit…
(8) Other	159	WBGene00050884	Y69H2.15	Y69H2.15	0.868978	0.520703	-2.63	0.0245	0.743	not known		none available
(8) Other	160	WBGene00013968	ZK287.9	ZK287.9	2.81634	0.52092	-2.7	0.0217	0.724	not known		none available
(8) Other	163	WBGene00010738	K10D3.4	K10D3.4	17.616	0.527659	-2.96	0.0139	0.619	not known		none available
(8) Other	164	WBGene00016027	C23H5.8a	C23H5.8	20.4743	0.531298	-2.31	0.0426	0.798	not known		none available
(8) Other	165	WBGene00010799	M01B2.6	chil-12	1.19232	0.532132	-3.76	0.00352	0.389	CHItinase-Like	glycoside hydrolase	none available
(8) Other	166	WBGene00007916	C34C6.3	C34C6.3	0.453927	0.532363	-2.34	0.0405	0.795	not known	EGF-like	none available
(8) Other	167	WBGene00012491	Y20C6A.1a	Y20C6A.1	2.4361	0.533323	-3.04	0.0122	0.598	not known	F-box domain	This gene encodes a protein containing an F-box, a motif predicted to mediate protein-protein interactions either with homologs of yeast Skp-1p or with other proteins; this gene's encoded protein also contains an FTH/DUF38 motif, which may also mediate protein-protein interaction.
(8) Other	169	WBGene00022242	Y73B6BL.21a	sfrp-1	1.66169	0.536322	-2.5	0.0308	0.743	Secreted Frizzled-Related Protein		none available
(8) Other	173	WBGene00021171	Y8A9A.2	Y8A9A.2	3.21655	0.541125	-2.51	0.0302	0.743	not known	thrombospondin	none available
(8) Other	174	WBGene00015402	C03G6.17	C03G6.17	1.69436	0.542358	-3.87	0.00295	0.358	not known		none available
(8) Other	175	WBGene00014055	ZK669.5a	ZK669.5	1.31725	0.54294	-2.48	0.0322	0.751	not known	Ras GTPase	none available
(8) Other	176	WBGene00018607	F48E3.8a	F48E3.8	5.19622	0.544474	-3.07	0.0115	0.593	not known		F48E3.8 encodes a polysaccharide deacetylase.
(8) Other	180	WBGene00008460	E02H4.2	E02H4.2	0.900594	0.548205	-2.81	0.018	0.683	not known		none available
(8) Other	182	WBGene00002195	F08F1.1a	kin-9	0.817852	0.551834	-3.73	0.00374	0.396	protein KINase		kin-9 encodes a predicted protein tyrosine kinase.
(8) Other	183	WBGene00011727	T12A7.6	T12A7.6	1.22543	0.553081	-2.36	0.0395	0.794	not known		none available
(8) Other	184	WBGene00000455	C10G8.6	ceh-34	1.98225	0.553699	-2.88	0.0159	0.644	C. Elegans Homeobox		ceh-34 encodes a homeodomain protein, homologous to human SIX2 (OMIM:604994); ceh-34 activity is required for regulation of the programmed cell death of a pharyngeal neuron, the sister of the M4 motor neuron; CEH-34 binds the egl-1 5'-regulatory region in vitro and acts together with EYA-1, with which it physically interacts, to regulate expression of egl-1 to promote programmed cell death of the…
(8) Other	185	WBGene00235340	C45G7.13	C45G7.13	2.42929	0.554942	-2.37	0.0387	0.789	not known		none available
(8) Other	186	WBGene00017576	F18F11.3a	cdh-8	2.50073	0.557426	-2.39	0.0373	0.778	CaDHerin family		cdh-8 encodes a cadherin that may be nematode specific; CDH-8 is predicted to function as a membrane protein that plays a role in cell adhesion and/or morphogenesis, but as loss of cdh-8 activity via mutation or large-scale RNAi experiments results in no obvious abnormalities, the precise role of cdh-8 in C. elegans development and/or behavior is not yet known.
(8) Other	187	WBGene00013975	ZK455.5	ZK455.5	0.858376	0.55919	-2.63	0.0245	0.743	not known	nucleotide transferase	none available
(8) Other	188	WBGene00016877	C52D10.3	C52D10.3	5.11354	0.559876	-3.41	0.00643	0.469	not known		none available
(8) Other	189	WBGene00011384	T02G6.1	T02G6.1	1.71768	0.560796	-3.35	0.00706	0.495	not known		none available
(8) Other	190	WBGene00195183	R04A9.9	R04A9.9	2.51868	0.560826	-3.61	0.00458	0.411	not known		none available
(8) Other	192	WBGene00044452	Y102E9.5	Y102E9.5	1.78784	0.563074	-2.27	0.0458	0.819	not known		none available
(8) Other	194	WBGene00021503	Y40D12A.2	Y40D12A.2	15.3108	0.564378	-2.97	0.0137	0.619	not known	carboxypeptidase	none available
(8) Other	195	WBGene00010110	F55D12.1	F55D12.1	2.71317	0.564741	-3.34	0.0072	0.495	not known		none available
(8) Other	197	WBGene00016759	C49A9.5	C49A9.5	2.61459	0.568292	-4.35	0.00136	0.22	not known		none available
(8) Other	198	WBGene00013755	Y113G7B.3	fbxa-115	2.36474	0.568725	-3.05	0.012	0.593	F-box A protein		This gene encodes a protein containing an F-box, a motif predicted to mediate protein-protein interactions either with homologs of yeast Skp-1p or with other proteins; this gene's encoded protein also contains an FTH/DUF38 motif, which may also mediate protein-protein interaction.
(8) Other	199	WBGene00021531	Y42G9A.1	Y42G9A.1	2.57672	0.569611	-2.82	0.0179	0.683	not known		none available
(8) Other	201	WBGene00000449	F46F3.1a	ceh-27	2.94629	0.569871	-2.6	0.026	0.743	C. Elegans Homeobox		ceh-27 encodes a homeodomain protein of the NK-2 class that contains Drosophila scarecrow and human NKX-2 (OMIM:606727); CEH-27 activity is essential for embryogenesis and appears to be required for maintaining hypodermal integrity during movement as embryos lacking CEH-27 burst at a breach in the ventral hypodermis upon commencement of muscle contractions; CEH-27 expression is first detected in …
(8) Other	202	WBGene00022330	Y82E9BL.14	fbxa-80	1.01442	0.572484	-2.39	0.0375	0.778	F-box A protein		none available
(8) Other	203	WBGene00001986	F43D2.4a	hot-1	1.63111	0.573127	-3.9	0.00282	0.355	Homolog of Odr-2 (Two)		hot-1 encodes a predicted paralog of ODR-2 and contains a Ly-6 domain; may be expressed in neurons.
(8) Other	204	WBGene00045132	ZK643.9	ZK643.9	2.12701	0.574278	-2.26	0.0464	0.819	not known		none available
(8) Other	206	WBGene00012778	Y42A5A.3	Y42A5A.3	1.43922	0.57719	-2.31	0.0426	0.798	not known		none available
(8) Other	207	WBGene00018468	F45E4.3a	F45E4.3	1.94746	0.580222	-2.57	0.0276	0.743	Temporarily Assigned Gene name		F45E4.3 encodes a protein containing C-terminal PDZ and C2 Ca2+-binding domains that is related to the mammalian active zone protein Piccolo/Aczonin; loss of F45E4.3 activity has been reported to result in uncoordinated locomotion, suggesting that F45E4.3 plays a role in the organization and/or function of the neuromuscular system.
(8) Other	209	WBGene00010350	H01G02.3a	H01G02.3	0.809178	0.583855	-2.52	0.0297	0.743	not known		none available
(8) Other	210	WBGene00021772	Y51H7BM.1	math-45	3.25131	0.584801	-2.45	0.0335	0.764	MATH (meprin-associated Traf homology) domain containing		none available
(8) Other	212	WBGene00007290	C04B4.2	C04B4.2	29.1591	0.589429	-2.42	0.0354	0.778	not known		none available
(8) Other	214	WBGene00001863	F15G9.4a	him-4	48.4322	0.589985	-3.4	0.00649	0.469	High Incidence of Males (increased X chromosome loss)		The him-4 gene encodes a large (5198-residue) extracellular protein, called 'hemicentin', that belongs to the immunoglobulin superfamily.
(8) Other	216	WBGene00012202	W02B12.4	W02B12.4	2.46765	0.590911	-4.93	0.000546	0.15	not known	carboxylesterase	none available
(8) Other	217	WBGene00044469	T26C12.6	clec-173	14.1753	0.591242	-2.83	0.0174	0.676	C-type LECtin		none available
(8) Other	218	WBGene00019605	K10B2.2a	K10B2.2	5.34999	0.592853	-3.12	0.0106	0.593	not known	carboxypeptidase	none available
(8) Other	219	WBGene00009403	F35C11.4	F35C11.4	1.99432	0.594382	-2.39	0.037	0.778	not known		none available
(8) Other	220	WBGene00008783	F14B6.2	F14B6.2	1.46314	0.59517	-2.4	0.0367	0.778	not known		none available
(8) Other	221	WBGene00011839	T19C4.5a	T19C4.5	1.68126	0.595596	-2.57	0.0273	0.743	not known		none available
(8) Other	222	WBGene00021895	Y54G2A.33	clec-84	10.2525	0.59566	-3.62	0.0045	0.411	C-type LECtin		none available
(8) Other	223	WBGene00018375	F43C9.1	F43C9.1	1.83889	0.596688	-2.68	0.0226	0.729	not known		This gene encodes a protein containing an F-box, a motif predicted to mediate protein-protein interactions either with homologs of yeast Skp-1p or with other proteins.
(8) Other	225	WBGene00015751	C14A11.6	C14A11.6	1.48811	0.597449	-2.67	0.0231	0.73	not known		none available
(8) Other	227	WBGene00021519	Y41D4B.17	Y41D4B.17	2.78908	0.599683	-2.4	0.0367	0.778	not known	transmembrane glycoprotein	none available
(8) Other	229	WBGene00021532	Y42G9A.2	Y42G9A.2	2.11459	0.60112	-2.68	0.0226	0.729	not known		none available
(8) Other	230	WBGene00009068	F23A7.3	F23A7.3	0.85558	0.602917	-2.55	0.0285	0.743	not known		none available
(8) Other	233	WBGene00016061	C24G6.6	hpo-15	46.1783	0.608379	-3.96	0.00254	0.337	Hypersensitive to POre-forming toxin	oxidoreductase	none available
(8) Other	234	WBGene00219316	F21A3.11	F21A3.11	9.98178	0.608571	-2.71	0.0214	0.722	not known		none available
(8) Other	235	WBGene00044795	C06H5.8a	C06H5.8	2.16683	0.608799	-2.92	0.0149	0.629	not known		none available
(8) Other	236	WBGene00016644	C44C1.5a	C44C1.5	11.6147	0.611808	-2.5	0.0306	0.743	not known		none available
(8) Other	237	WBGene00185092	K08D8.7a	K08D8.7	1.20663	0.61361	-2.29	0.0447	0.815	not known		none available
(8) Other	238	WBGene00000998	K07E12.1a	dig-1	46.3896	0.614592	-3.4	0.00649	0.469	DIsplaced Gonad		dig-1 encodes a giant member of the immunoglobulin superfamily; dig-1 functions cell non-autonomously to mediate axon fasciculation and maintenance of cell body position within ganglia; dig-1 is also required for proper placement of the gonad; dig-1 is initially expressed in the developing embryonic gut and then expressed by a number of different muscle cells, including the body wall, head, vulva…
(8) Other	241	WBGene00007404	C07A9.8	best-5	0.849981	0.617067	-2.24	0.0482	0.83	BESTrophin (chloride channel) homolog		none available
(8) Other	242	WBGene00010328	F59C6.11	F59C6.11	2.15745	0.617964	-2.93	0.0147	0.629	not known		F59C6.11 encodes a claudin homolog that may be required for normal cohesion of apical junctions in epithelia; F59C6.11 is worm-specific, with obvious homologs only in C. elegans; F59C6.11 has no obvious function in mass RNAi assays; claudins are integral membrane proteins with four transmembrane sequences that are found in mammalian tight junctions (TJs), induce TJs when transgenically expressed …
(8) Other	243	WBGene00020294	T06F4.1a	T06F4.1	1.56321	0.619563	-2.68	0.0227	0.729	not known		none available
(8) Other	245	WBGene00017418	F13B6.3	F13B6.3	3.34704	0.621072	-2.44	0.0343	0.768	not known		none available
(8) Other	246	WBGene00017426	F13C5.5	F13C5.5	2.14848	0.622121	-3.07	0.0116	0.593	not known		none available
(8) Other	247	WBGene00016935	C54G7.4	ifta-1	2.28758	0.622512	-2.3	0.0438	0.808	IntraFlagellar Transport Associated		ifta-1 encodes a evolutionarily conserved protein found in ciliated unicellular and multicellular organisms including humans and is absent in non-ciliated organisms like yeast; IFTA-1 contains a X-box and several N-terminal WD repeats; ifta-1 is required for retrograde intraflagellar transport and likely associates with, or is a core component of the IFT-A subcomplex; ifta-1 is also required for …
(8) Other	248	WBGene00011753	T13F3.6	T13F3.6	25.1828	0.623337	-2.23	0.049	0.833	not known		none available
(8) Other	250	WBGene00008709	F11E6.6	F11E6.6	0.658818	0.625582	-2.74	0.0202	0.701	not known		none available
(8) Other	252	WBGene00018594	F48C1.1	aman-3	7.52383	0.63135	-2.57	0.0274	0.743	Alpha MANnosidase		aman-3 encodes a Co(II)-activated alpha-mannosidase II, orthologous to human MAN2C1; AMAN-3 is predicted to remove mannose residues from the N-linked oligosaccharides of glycoproteins; AMAN-3 contains three predicted N-glycosylation sites; AMAN-3 is biochemically active in vitro, with a pH optimum of 6.5; AMAN-3 requires either Co(II) or Mn(II) for activity, preferring the former ion; since aman-…
(8) Other	253	WBGene00002056	M6.1a	ifc-2	62.0918	0.631558	-3.62	0.0045	0.411	Intermediate Filament, C		ifc-2 encodes three isoforms of an intermediate filament protein dispensable for viability but required for normal movement, growth rate, body size, body shape, and cuticle strength; IFC-2 is present in the cytoplasm of intestinal cells, and at the desmosomes of intestinal and pharyngeal cells.
(8) Other	254	WBGene00015050	B0218.6a	clec-51	5.52222	0.631841	-3.24	0.00853	0.524	C-type LECtin		none available
(8) Other	255	WBGene00003958	F23B2.11	pcp-3	15.6313	0.632126	-2.55	0.0282	0.743	Prolyl Carboxy Peptidase like		none available
(8) Other	256	WBGene00004987	T08A9.12	spp-2	7.84837	0.633084	-2.28	0.0455	0.819	SaPosin-like Protein family		spp-2 encodes an antimicrobial peptide that belongs to the SPP-protein family, called caenopores, with structural similarity to saposin-like proteins (SAPLIPs), the amoebapores and the mammalian NK-lysin and granulysin; caenopores are part of the worm's innate immune system and interact with and eliminate bacteria via membrane pore-forming activity; C. elegans has at least 33 putative SPP protein…
(8) Other	259	WBGene00016134	C26B9.5	C26B9.5	20.7032	0.63733	-3.33	0.00729	0.495	not known	peptidase	none available
(8) Other	260	WBGene00008560	F07H5.9a	pho-13	4.24159	0.637566	-2.42	0.0354	0.778	intestinal acid PHOsphatase		none available
(8) Other	261	WBGene00011182	R09H10.5	R09H10.5	88.769	0.637843	-2.74	0.0205	0.702	not known	EGF-like	none available
(8) Other	262	WBGene00002139	R12E2.4a	inx-17	6.45311	0.640187	-3.84	0.0031	0.365	INneXin		none available
(8) Other	264	WBGene00019682	K12H4.7a	K12H4.7	167.228	0.643611	-3.17	0.00962	0.561	not known	carboxypeptidase	none available
(8) Other	266	WBGene00010454	K01B6.3	K01B6.3	1.16226	0.64549	-2.52	0.03	0.743	not known		none available
(8) Other	269	WBGene00017892	F28B4.3	F28B4.3	221.905	0.650793	-3.09	0.0112	0.593	not known	C-type lectin	none available
(8) Other	274	WBGene00001581	F57F4.3	gfi-1	89.9303	0.653875	-2.58	0.0267	0.743	GEI-4 (Four) Interacting protein		gfi-1 encodes a protein that contains 21 ET modules; interacts with unc-68 in yeast two-hybrid assays.
(8) Other	275	WBGene00019261	H34I24.2	H34I24.2	161.42	0.656431	-2.78	0.019	0.691	not known		none available
(8) Other	276	WBGene00008194	C49C3.4a	C49C3.4	95.8569	0.657327	-2.81	0.0182	0.683	not known	EGF-like	none available
(8) Other	277	WBGene00015469	C05D2.8	C05D2.8	28.9447	0.657422	-3.28	0.008	0.515	not known		none available
(8) Other	278	WBGene00001456	F33D4.3	flp-13	2.51521	0.657597	-2.92	0.0149	0.629	FMRF-Like Peptide		none available
(8) Other	279	WBGene00017796	F25G6.1	F25G6.1	2.41067	0.657945	-2.26	0.047	0.822	not known		none available
(8) Other	281	WBGene00009880	F49C12.11	F49C12.11	68.6255	0.658321	-2.33	0.0414	0.798	not known		none available
(8) Other	286	WBGene00010658	K08D8.4a	K08D8.4	10.5345	0.659999	-2.44	0.0341	0.768	not known	CUB-like domain	none available
(8) Other	287	WBGene00015803	C15H9.9	C15H9.9	37.013	0.661533	-2.85	0.0169	0.661	not known		none available
(8) Other	288	WBGene00045275	F18E3.12	F18E3.12	6.63852	0.663436	-2.35	0.0403	0.795	not known		none available
(8) Other	289	WBGene00007357	C06A12.3a	C06A12.3	3.94131	0.663542	-3.48	0.0057	0.457	not known		none available
(8) Other	293	WBGene00021533	Y42G9A.3a	Y42G9A.3	9.55645	0.66873	-3.71	0.00389	0.401	not known	leucine rich repeat	none available
(8) Other	294	WBGene00020022	R12C12.1a	R12C12.1	37.5411	0.668962	-2.58	0.0267	0.743	not known		R12C12.1 is orthologous to human GLYCINE DECARBOXYLASE (GLDC; OMIM:238300), which when mutated leads to glycine encephalopathy.

## Sheet: Supplementary file 1c
Grouping	Rank	Wormbase	Sequence	Gene Name	WT CPM	FC	t	P	FDR	Gene Class	Description
(1) Detoxification	1	WBGene00001764	F37B1.5	gst-16	2.11281	0.0307393	-8.82	4.13e-06	0.0203	Glutathione S-Transferase	none available
(1) Detoxification	6	WBGene00014206	ZK1058.6	nit-1	3.45354	0.109735	-10.2	1.04e-06	0.0131	NITrilase	none available
(1) Detoxification	39	WBGene00001752	K08F4.7	gst-4	14.1712	0.318101	-5.25	0.000342	0.102	Glutathione S-Transferase	gst-4 encodes a putative glutathione-requiring prostaglandin D synthase; gst-4 is required for sperm to normally migrate towards a PUFA-based signal exuded by oocytes; gst-4(RNAi) hermaphrodites are infertile, both through aberrant loss of their own sperm and through failure of males to effectively inseminate them; in mammalian eicosanoid signalling, prostaglandin D synthase is required for the c…
(1) Detoxification	77	WBGene00001761	T26C5.1	gst-13	16.6825	0.392266	-4.9	0.000577	0.112	Glutathione S-Transferase	none available
(1) Detoxification	107	WBGene00009554	F39B2.3	F39B2.3	17.2324	0.429173	-5.57	0.000215	0.0861	not known	F39B2.3 encodes an NADH quinone oxidoreductase.
(1) Detoxification	229	WBGene00010759	K10H10.2	cysl-2	16.9461	0.533045	-4.58	0.000936	0.125	CYsteine Synthase Like	cysl-2 encodes a homolog of sulfhydrylases/cysteine synthases.
(1) Detoxification	230	WBGene00001786	F35E8.8	gst-38	4.51015	0.533148	-3.21	0.00895	0.295	Glutathione S-Transferase	gst-38 encodes a glutathione-S-transferase; gst-38 is predicted to function as a phase II detoxification enzyme and its expression is altered in response to stress; a GST-38::GFP reporter is expressed in the intestine.
(1) Detoxification	249	WBGene00001755	F11G11.2	gst-7	51.1044	0.544116	-3.72	0.00382	0.219	Glutathione S-Transferase	gst-7 encodes a predicted glutathione S-transferase.
(1) Detoxification	356	WBGene00001749	R107.7	gst-1	78.8582	0.599706	-2.33	0.0416	0.453	Glutathione S-Transferase	gst-1 encodes a putative glutathione S-transferase of the pi class; GST-1 is required for sperm to normally migrate towards a PUFA-based signal exuded by oocytes; gst-1(RNAi) hermaphrodites are infertile, both through aberrant loss of their own sperm and through failure of males to effectively inseminate them.
(1) Detoxification	405	WBGene00001768	Y48E1B.10	gst-20	17.4915	0.619557	-2.26	0.0466	0.469	Glutathione S-Transferase	none available
(1) Detoxification	444	WBGene00021200	Y17G9B.3	cyp-31A3	24.7078	0.637469	-2.58	0.0269	0.39	CYtochrome P450 family	The Y17G9B.3 gene encodes a homolog of the human gene CYP7B1, which when mutated leads to pseudovitamin D deficiency rickets (OMIM:264700).
(2) Lipid metabolism	59	WBGene00020016	R11G11.14	lipl-3	1.18391	0.361352	-2.6	0.026	0.387	LIPase Like	none available
(2) Lipid metabolism	88	WBGene00007833	C31A11.5	oac-6	7.82892	0.401808	-3.35	0.0071	0.276	O-ACyltransferase homolog	none available
(2) Lipid metabolism	172	WBGene00008602	F09B9.1	oac-14	10.3511	0.486676	-3.84	0.00309	0.202	O-ACyltransferase homolog	none available
(2) Lipid metabolism	303	WBGene00008583	F08G5.5a	ugt-65	2.09917	0.574117	-2.24	0.0484	0.478	UDP-GlucuronosylTransferase	none available
(2) Lipid metabolism	399	WBGene00011517	T06C12.10	cgt-1	1.89833	0.615872	-2.61	0.0253	0.385	Ceramide Glucosyl Transferase	cgt-1 encodes a transmembrane protein that is one of three C. elegans ceramide glucosyltransferases; by homology, CGT-1 is predicted to localize to the Golgi membrane and catalyze the transfer of glucose from UDP-glucose to ceramide to synthesize glucosylceramide, a glycosphingolipid precursor; although cgt-1 mutant worms show no obvious defects, animals doubly mutant for cgt-1 and cgt-3 arrest d…
(2) Lipid metabolism	438	WBGene00008485	F01D4.1a	ugt-43	3.87567	0.633337	-2.37	0.0388	0.435	UDP-GlucuronosylTransferase	none available
(2) Lipid metabolism	457	WBGene00016844	C50F7.4	sucg-1	53.801	0.642833	-2.72	0.0212	0.367	SUCcinyl-CoA ligase, GTP-specific, beta subunit	none available
(2) Lipid metabolism	505	WBGene00009186	F27C8.6	trcs-1	200.171	0.660616	-2.37	0.0389	0.436	TRansport of membrane to Cell Surface	trcs-1 encodes a putative arylacetamide deacetylase and microsomal lipase; TRCS-1 is required for sperm to normally migrate towards a PUFA-based signal exuded by oocytes; trcs-1(RNAi) hermaphrodites are infertile, both through aberrant loss of their own sperm and through failure of males to effectively inseminate them.
(2) Lipid metabolism	516	WBGene00015965	C18C4.3	ugt-48	4.24159	0.66309	-2.45	0.0338	0.422	UDP-GlucuronosylTransferase	none available
(3) Proteasome	159	WBGene00004468	ZK20.5	rpn-12	68.0062	0.478265	-6.21	8.95e-05	0.056	proteasome Regulatory Particle, Non-ATPase-like	rpn-12 is predicted to encode a non-ATPase subunit of the 19S regulatory complex of the proteasome that interacts with NHR-6 in yeast two-hybrid assays.
(3) Proteasome	235	WBGene00003925	C36B1.4	pas-4	93.8405	0.53566	-4.86	0.000611	0.112	Proteasome Alpha Subunit	pas-4 encodes a proteasome alpha-type seven subunit of the core 20S proteasome subcomplex; loss of pas-4 activity via RNAi results in a wide variety of defects including embryonic and larval lethality, sterility, abnormal locomotion, slow growth, and abnormal transgene expression and subcellular localization; loss of pas-4 activity also results in activation of SKN-1, a transcription factor requi…
(3) Proteasome	273	WBGene00003952	C02F5.9	pbs-6	76.7458	0.559907	-4.74	0.000737	0.117	Proteasome Beta Subunit	The pbs-6 gene encodes a homolog of mammalian PSMB1.
(3) Proteasome	300	WBGene00003950	T20F5.2	pbs-4	100.614	0.57159	-4.82	0.000652	0.112	Proteasome Beta Subunit	pbs-4 encodes a B-type subunit of the 26S proteasome's 20S protease core particle; by homology, PBS-4 is predicted to function in ATP/ubiquitin-dependent nonlysosomal protein degradation; loss of pbs-4 activity via RNAi indicates that, in C. elegans, PBS-4 is required for embryonic, germline, and larval development.
(3) Proteasome	320	WBGene00004460	C30C11.2	rpn-3	177.894	0.58038	-5.64	0.000196	0.0856	proteasome Regulatory Particle, Non-ATPase-like	none available
(3) Proteasome	324	WBGene00003926	F25H2.9	pas-5	107.704	0.585545	-4.13	0.00195	0.158	Proteasome Alpha Subunit	pas-5 encodes a proteasome alpha-type five subunit of the core 20S proteasome subcomplex; loss of pas-5 activity via RNAi results in a variety of defects including embryonic and larval lethality, sterility, and abnormal locomotion; loss of pas-5 activity also results in activation of SKN-1, a transcription factor required in adult worms for the acute response to oxidative stress and maternally fo…
(3) Proteasome	325	WBGene00004504	F23F1.8a	rpt-4	109.215	0.585811	-4.51	0.00105	0.13	proteasome Regulatory Particle, ATPase-like	rpt-4 encodes a predicted ATPase subunit of the 19S regulatory complex of the proteasome that affects body morphology, embryonic viability, growth, movement, and fertility; interacts with itself in yeast two-hybrid assays.
(3) Proteasome	336	WBGene00004463	F49C12.8	rpn-7	161.649	0.59037	-4.63	0.000872	0.124	proteasome Regulatory Particle, Non-ATPase-like	rpn-7 is predicted to encode a non-ATPase subunit of the 19S regulatory complex of the proteasome that affects fertility and embryonic viability.
(3) Proteasome	371	WBGene00003953	F39H11.5	pbs-7	94.5906	0.606607	-4.13	0.00193	0.158	Proteasome Beta Subunit	pbs-7 encodes a B-type subunit of the 26S proteasome's 20S protease core particle; by homology, PBS-7 is predicted to function in ATP/ubiquitin-dependent nonlysosomal protein degradation; loss of pbs-7 activity via large-scale RNAi screens indicates that, in C. elegans, PBS-7 is required for normal movement and for embryonic, germline, and larval development.
(3) Proteasome	386	WBGene00003928	ZK945.2	pas-7	101.309	0.611611	-4.64	0.000856	0.124	Proteasome Alpha Subunit	pas-7 encodes a proteasome alpha-type three subunit of the core 20S proteasome subcomplex; loss of pas-7 activity via RNAi results in several defects including embryonic and larval lethality, sterility, and abnormal meiotic progression.
(3) Proteasome	396	WBGene00004502	F29G9.5	rpt-2	152.181	0.615573	-4.79	0.000685	0.112	proteasome Regulatory Particle, ATPase-like	none available
(3) Proteasome	409	WBGene00003923	D1054.2	pas-2	118.96	0.620289	-3.37	0.00682	0.275	Proteasome Alpha Subunit	pas-2 encodes a proteasome subunit with highest similarity to vertebrate proteasome alpha 2 subunits.
(3) Proteasome	433	WBGene00003948	C47B2.4	pbs-2	88.1702	0.630156	-4.84	0.000628	0.112	Proteasome Beta Subunit	none available
(3) Proteasome	437	WBGene00004465	T06D8.8	rpn-9	114.152	0.632981	-3.8	0.00335	0.208	proteasome Regulatory Particle, Non-ATPase-like	rpn-9 is predicted to encode a non-ATPase subunit of the 19S regulatory complex of the proteasome that that affects body morphology, embryonic viability, locomotion, larval viability, fertility, and growth; interacts with RPN-11 in yeast two-hybrid assays.
(3) Proteasome	448	WBGene00004503	F23F12.6	rpt-3	97.8883	0.639527	-4.16	0.00184	0.158	proteasome Regulatory Particle, ATPase-like	rpt-3 encodes a triple A ATPase subunit of the 26S proteasome's 19S regulatory particle (RP) base subcomplex; RPT-3 is required for embryonic, larval, and germline development and by homology, is predicted to function in unfolding protein substrates and translocating them into the core proteolytic particle (CP) of the proteasome.
(3) Proteasome	464	WBGene00004466	B0205.3	rpn-10	62.6523	0.647208	-4.25	0.0016	0.155	proteasome Regulatory Particle, Non-ATPase-like	rpn-10 encodes a protein that contains two ubiquitin interaction motifs and is a member of the von Willebrand factor, type A superfamily similar to the mouse 26S proteasome non-ATP regulatory subunit 4.
(3) Proteasome	483	WBGene00004505	F56H1.4	rpt-5	133.925	0.653936	-4.5	0.00107	0.13	proteasome Regulatory Particle, ATPase-like	rpt-5 encodes a triple A ATPase subunit of the 26S proteasome's 19S regulatory particle (RP) base subcomplex; RPT-5 is required for embryonic, larval, and germline development and by homology, is predicted to function in unfolding protein substrates and translocating them into the core proteolytic particle (CP) of the proteasome.
(3) Proteasome	488	WBGene00004458	T22D1.9	rpn-1	270.595	0.654819	-3.68	0.00405	0.223	proteasome Regulatory Particle, Non-ATPase-like	rpn-1 encodes a non-ATPase subunit of the 26S proteasome's 19S regulatory particle (RP) base subcomplex; rpn-1 activity is essential for embryonic, larval, and germline development; by homology, RPN-1 is predicted to function in unfolding and recognition of protein substrates and/or recycling of ubiquitin moieties during protein degradation.
(3) Proteasome	501	WBGene00003949	Y38A8.2	pbs-3	80.5806	0.65966	-3.38	0.00673	0.275	Proteasome Beta Subunit	pbs-3 encodes a B-type subunit of the 26S proteasome's 20S protease core particle; by homology, PBS-3 is predicted to function in ATP/ubiquitin-dependent nonlysosomal protein degradation; loss of pbs-3 activity via large-scale RNAi screens indicates that, in C. elegans, PBS-3 is required for embryonic and germline development, movement, normal body coloration, and normal body morphology.
(3) Proteasome	524	WBGene00004467	K07D4.3	rpn-11	99.253	0.665221	-3.69	0.00397	0.223	proteasome Regulatory Particle, Non-ATPase-like	rpn-11 encodes a predicted non-ATPase subunit of the 19S regulatory complex of the proteasome that affects adult viability, osmoregulation, embryonic viability, and movement; interacts with itself, RPN-9, and F55A11.3, based on yeast two-hybrid assays.
(3) Proteasome	527	WBGene00004506	Y49E10.1	rpt-6	95.3416	0.666431	-4.18	0.00179	0.158	proteasome Regulatory Particle, ATPase-like	rpt-6 encodes a triple A ATPase that is a subunit of the 26S proteasome 19S regulatory particle (RP) base subcomplex; RPT-6 is required for embryonic and larval development and by homology, is predicted to function in unfolding protein substrates and translocating them into the core proteolytic particle (CP) of the proteasome.
(3) Proteasome	528	WBGene00003947	K08D12.1	pbs-1	117.064	0.669602	-4.52	0.00103	0.13	Proteasome Beta Subunit	pbs-1 encodes a protease subunit with highest similarity to vertebrate proteasome subunit beta type 6 that affects fertility, embryonic viability, locomotion, and larval viability
(4) ECM	9	WBGene00019619	K10C2.3	asp-14	22.2125	0.164128	-7.54	1.68e-05	0.0303	ASpartyl Protease	asp-14 encodes an aspartyl protease.
(4) ECM	314	WBGene00000753	C44C10.1	col-180	1.21818	0.578029	-2.24	0.0486	0.478	COLlagen	none available
(4) ECM	365	WBGene00007488	C09G5.2a	dph-2	17.5812	0.603121	-3.46	0.00585	0.257	DiPHthamide biosynthesis protein	dph-2 encodes an ortholog of S. cerevisiae DPH2/YKL191W and human DPH2L2 (OMIM:603456); DPH-2 is a putative protein component of diphtamide synthesis.
(4) ECM	402	WBGene00007352	C06A1.1	cdc-48.1	536.907	0.616714	-3.88	0.00292	0.196	Cell Division Cycle related	cdc-48.1 encodes a type II AAA ATPase, homologous to yeast Cdc48 and mammalian p97/VCP, that functions as a ubiquitin-selective chaperone; cdc-48.1 acts redundantly with cdc-48.2 and in conjunction with ufd-1 and npl-4 in endoplasmic reticulum-associated protein degradation (ERAD); in addition, CDC-48.1, UFD-2 and chn-1 function together to regulate myosin assembly and muscle formation via the UN…
(4) ECM	407	WBGene00004737	F10G7.4	scc-1	41.9943	0.619809	-2.39	0.0373	0.434	yeast SCC (mitotic condensin subunit) homolog	scc-1 encodes a member of the Rad21/Rec8-like family of cohesion proteins that affects embryonic viability, fertility, the rate of embryonic cell divisions and the incidence of male progeny; interacts with ATL-1, F56D12.5, and F11E6.1 based on yeast two-hybrid assays, and is expressed in nondividing embryonic and germline nuclei.
(4) ECM	416	WBGene00010093	F55C5.4	capg-2	55.6821	0.622091	-3.15	0.01	0.3	CAP-G condensin subunit	none available
(4) ECM	454	WBGene00000885	T27D1.1	cyn-9	17.6147	0.641532	-3.43	0.00617	0.265	CYclophyliN	cyn-9 encodes a peptidyl prolyl cis-trans isomerase most similar to human cyclophilin G (OMIM:606093); CYN-9 likely functions as a catalyst in the folding and modification of cuticle collagens; a cyn-9::lacZ reporter is expressed in the syncytial hypodermis from early larval through adult stages; cyn-9 mRNA is expressed most strongly at the mid-L3 and mid-L4 larval stages, the intermoult period w…
(4) ECM	459	WBGene00013958	ZK265.6	ZK265.6	27.9018	0.645057	-2.28	0.0449	0.464	not known	none available
(4) ECM	466	WBGene00000405	T05G5.3	cdk-1	102.873	0.647335	-2.45	0.0339	0.422	Cyclin-Dependent Kinase family	cdk-1 encodes a cyclin-dependent kinase, orthologous to and functionally interchangeable with CDC28 from S. cerevisiae; CDK-1 is required for cell-cycle progression through M phase in both meiosis and mitosis; in regulating progression through meiosis and the oocyte-to-egg transition, CDK-1 functions to regulate the activity of the MBK-2 DYRK2 family kinase that phosphorylates a number of substra…
(5) Transcription	35	WBGene00001440	F40H3.4a	fkh-8	0.757676	0.31237	-2.31	0.043	0.459	ForKHead transcription factor family	fkh-8 encodes one of 15 C. elegans forkhead transcription factors; loss of fkh-8 activity via RNAi has been reported to result in either no defects or a weakly penetrant aldicarb resistance phenotype; an FKH-8 reporter fusion is expressed in nerve cells in the head and tail ganglia of both males and hermaphrodites with expression beginning in the later stages of embryogenesis and continuing throu…
(5) Transcription	55	WBGene00001981	C44C10.8	hnd-1	2.22394	0.356971	-2.8	0.0183	0.357	HAND bHLH transcription factor family	hnd-1 encodes a Hand bHLH transcription factor required for normal viability, gonadogenesis, and posterior body morphology; HND-1 is required for the formation of both somatic gonadal precursors and primordial germ cells, but not for later gonadogenesis; HND-1 is expressed embryogenesis in embryonic mesodermal precursor cells generating (mostly) body wall muscle, in somatic gonad precursor cells,…
(5) Transcription	117	WBGene00012405	Y6G8.3	ztf-25	5.37473	0.438604	-3.36	0.00698	0.275	Zinc finger putative Transcription Factor family	none available
(5) Transcription	154	WBGene00012101	T27F2.4	zip-10	2.86933	0.473619	-3.57	0.00487	0.237	bZIP transcription factor family	none available
(5) Transcription	206	WBGene00006387	W09B6.2	taf-6.1	17.748	0.515666	-3.6	0.00463	0.235	TAF (TBP-associated transcription factor) family	none available
(5) Transcription	240	WBGene00007932	C34D1.5a	zip-5	2.10626	0.538738	-3.33	0.00732	0.277	bZIP transcription factor family	zip-5 encodes a bZip transcription factor; a zip-5::gfp promoter reporter gene fusion is expressed primarily in the nervous system, with mid- and late-stage embryos showing strong expression in head neurons, while larvae show expression in the ventral nerve cord and head and tail neurons; adults also show GFP expression in head muscles and intermittently in the intestine.
(5) Transcription	254	WBGene00013319	Y57G11C.25	ccch-5	2.55514	0.546233	-2.28	0.0449	0.464	CCCH-type zinc finger putative transcription factor	Y57G11C.25 encodes a CCCH tandem zinc finger (TZF) protein; based upon its sequence similarity to C. elegans POS-1, the product of Y57G11C.25 is predicted to function as an RNA-binding protein.
(5) Transcription	308	WBGene00007014	T09A5.6	mdt-10	10.2241	0.576002	-4.26	0.00157	0.155	MeDiaTor	none available
(5) Transcription	327	WBGene00003164	Y57E12AL.5	mdt-6	29.7018	0.586458	-3.58	0.00478	0.236	MeDiaTor	mdt-6 encodes a highly conserved transcriptional mediator of the Med6 family that includes Saccharomyces cerevisiae Med6 and human MED6 (OMIM:602984); MDT-6 is an essential gene required maternally for embryogenesis and zygotically for postembryonic transcriptional regulation of genes involved in the Ras and Wnt signaling pathways that mediate vulval and male tail formation, respectively; mdt-6 i…
(5) Transcription	347	WBGene00011066	R06C7.9a	ztf-15	26.1492	0.596751	-2.3	0.0437	0.461	Zinc finger putative Transcription Factor family	none available
(5) Transcription	357	WBGene00009202	F28C6.1	aptf-4	4.69151	0.600234	-2.26	0.0466	0.469	AP-2 Transcription Factor family	aptf-4 encodes one of four C. elegans AP-2-like transcription factors; APTF-4 that is ~60% identical to that of APTF-3 which lies immediately adjacent to aptf-4 on chromosome II; loss of aptf-4 activity via large-scale RNAi experiments results in embryonic and larval lethality.
(5) Transcription	395	WBGene00000220	K08F8.2	atf-2	5.16299	0.615371	-2.3	0.0435	0.46	ATF (cAMP-dependent transcription factor) family	atf-2 encodes a cAMP-dependent transcription factor paralogous to CES-2, a bZip-like transcription factor that plays a key role in regulation of apoptosis; atf-2 activity is required for excretory duct cell development and essential for embryonic development; in regulating excretory duct cell development, ATF-2 controls expression of lin-48; in vitro, ATF-2 binds the regulatory regions of LIN-48 …
(5) Transcription	446	WBGene00007013	Y62F5A.1a	mdt-8	24.472	0.63838	-2.62	0.025	0.384	MeDiaTor	none available
(5) Transcription	449	WBGene00007012	ZK546.13	mdt-4	16.6681	0.639551	-2.94	0.0145	0.331	MeDiaTor	none available
(5) Transcription	473	WBGene00004411	C42D4.8	rpc-1	55.0239	0.649379	-2.63	0.0248	0.383	RNA Polymerase, Class III (C)	none available
(5) Transcription	481	WBGene00020399	T10B11.3	ztf-4	27.0875	0.652722	-4.04	0.00225	0.166	Zinc finger putative Transcription Factor family	none available
(5) Transcription	498	WBGene00006394	K10D3.3	taf-11.2	18.3074	0.658765	-2.44	0.0341	0.422	TAF (TBP-associated transcription factor) family	none available
(6) Receptor	29	WBGene00005833	C25F9.7	srw-86	0.786913	0.297969	-3.99	0.00244	0.178	Serpentine Receptor, class W	none available
(6) Receptor	114	WBGene00005657	C13D9.1	srr-6	0.913776	0.436038	-3.12	0.0106	0.305	Serpentine Receptor, class R	none available
(7) Channel/Transporter	201	WBGene00004904	Y46G5A.30	snf-5	0.896368	0.512667	-2.78	0.019	0.357	Sodium: Neurotransmitter symporter Family	none available
(7) Channel/Transporter	234	WBGene00000007	T11F9.4a	aat-6	3.01893	0.534822	-2.72	0.021	0.367	Amino Acid Transporter	aat-6 encodes a predicted amino acid transporter catalytic subunit; unlike catalytic subunits in other organisms, however, AAT-6 does not contain the highly conserved cysteine residue known to facilitate covalent interaction with a glycoprotein subunit, suggesting that AAT-6 does not require this residue for heterodimer formation or alternatively, does not require the glycoprotein subunit for fun…
(8) Other	2	WBGene00007867	C32H11.4	C32H11.4	8.85114	0.0509123	-7.27	2.33e-05	0.0352	not known	none available
(8) Other	3	WBGene00007875	C32H11.12	dod-24	28.0906	0.0517994	-6.14	9.78e-05	0.056	Downstream Of DAF-16 (regulated by DAF-16)	none available
(8) Other	4	WBGene00016577	C41H7.7	clec-3	0.437317	0.0523597	-7.6	1.57e-05	0.0303	C-type LECtin	none available
(8) Other	5	WBGene00010123	F55G11.2	F55G11.2	1.90545	0.094846	-5.54	0.000224	0.0861	not known	F55G11.2 encodes a protein containing a CUB (complement C1r/C1s, Uegf, Bmp1)-like domain; F55G11.2 expression is upregulated in response to infection with the human bacterial pathogen Pseudomonas aeruginosa; F55G11.2 expression is regulated by the ELT-2 GATA transcription factor.
(8) Other	7	WBGene00019214	H20E11.2	H20E11.2	0.336135	0.154633	-3.1	0.0108	0.308	not known	none available
(8) Other	8	WBGene00008493	F01D5.2	F01D5.2	2.57341	0.156083	-2.91	0.0151	0.331	not known	none available
(8) Other	10	WBGene00022292	Y75D11A.3	Y75D11A.3	4.38584	0.182759	-4.08	0.0021	0.16	not known	none available
(8) Other	11	WBGene00012916	Y46G5A.28	Y46G5A.28	2.42813	0.183302	-4.41	0.00123	0.138	not known	none available
(8) Other	12	WBGene00021796	Y52E8A.3	Y52E8A.3	1.21502	0.200709	-3.48	0.00566	0.253	not known	none available
(8) Other	13	WBGene00022262	Y73C8C.3	Y73C8C.3	1.65351	0.20623	-6.7	4.69e-05	0.0492	not known	none available
(8) Other	14	WBGene00016056	C24D10.5	C24D10.5	2.28369	0.208279	-6.17	9.36e-05	0.056	not known	none available
(8) Other	15	WBGene00010745	K10D11.1	dod-17	5.85849	0.222232	-2.85	0.0169	0.348	Downstream Of DAF-16 (regulated by DAF-16)	none available
(8) Other	16	WBGene00020543	T17A3.6	fbxb-83	1.40471	0.22448	-6.3	7.9e-05	0.056	F-box B protein	none available
(8) Other	17	WBGene00015766	C14C11.2	C14C11.2	10.6635	0.226187	-3.92	0.00271	0.188	not known	none available
(8) Other	18	WBGene00219210	Y37H2A.18	Y37H2A.18	1.60047	0.255605	-3.89	0.00286	0.194	not known	none available
(8) Other	19	WBGene00018725	F53A9.2	F53A9.2	0.513475	0.258102	-2.96	0.0138	0.331	not known	none available
(8) Other	20	WBGene00016229	C29G2.1	C29G2.1	2.0338	0.262992	-3.26	0.00823	0.288	not known	none available
(8) Other	21	WBGene00022265	Y73C8C.8	Y73C8C.8	2.45973	0.265745	-3.34	0.00719	0.276	not known	none available
(8) Other	22	WBGene00020859	T27C10.4	bath-25	0.517929	0.266366	-4.15	0.00188	0.158	BTB and MATH domain containing	none available
(8) Other	23	WBGene00020438	T12A2.3	T12A2.3	1.35508	0.268729	-4.73	0.00075	0.117	not known	none available
(8) Other	24	WBGene00019039	F58E1.8	fbxb-18	0.630762	0.268729	-3.36	0.00692	0.275	F-box B protein	This gene encodes a protein containing an F-box, a motif predicted to mediate protein-protein interactions either with homologs of yeast Skp-1p or with other proteins; this gene's encoded protein also contains leucine-rich repeats.
(8) Other	25	WBGene00019215	H20E11.3a	H20E11.3	2.88755	0.2839	-2.78	0.0191	0.357	not known	none available
(8) Other	26	WBGene00014135	ZK896.4	ZK896.4	2.24537	0.287464	-5.26	0.000334	0.102	not known	none available
(8) Other	27	WBGene00013254	Y57A10A.9	tag-276	2.22269	0.29282	-3.74	0.00367	0.219	Temporarily Assigned Gene name	none available
(8) Other	28	WBGene00021491	Y40B10A.6	comt-4	2.95699	0.294809	-2.43	0.0347	0.422	Catechol-O-MethylTransferase family	none available
(8) Other	30	WBGene00018103	F36H5.4	F36H5.4	1.54716	0.299321	-3.72	0.00382	0.219	not known	none available
(8) Other	31	WBGene00010209	F57G4.4	fbxa-191	1.2112	0.30314	-3.16	0.00985	0.3	F-box A protein	none available
(8) Other	32	WBGene00015974	C18E3.5	C18E3.5	17.8611	0.307433	-8.67	4.84e-06	0.0203	not known	none available
(8) Other	33	WBGene00006627	C02F5.8	tsp-1	1.99953	0.307466	-2.84	0.017	0.35	TetraSPanin family	none available
(8) Other	34	WBGene00001942	T23D8.6	his-68	10.1657	0.312285	-2.54	0.0287	0.399	HIStone	his-68 encodes an H2A histone.
(8) Other	36	WBGene00022181	Y71H2AM.16	pho-9	4.38259	0.314469	-5.38	0.000283	0.0975	intestinal acid PHOsphatase	none available
(8) Other	37	WBGene00010568	K04G2.10	K04G2.10	8.26857	0.317543	-2.24	0.048	0.476	not known	none available
(8) Other	38	WBGene00008496	F01D5.6	F01D5.6	0.909573	0.318029	-2.67	0.0228	0.377	not known	none available
(8) Other	40	WBGene00021178	Y9C9A.8	Y9C9A.8	0.699205	0.320205	-3.16	0.00982	0.3	not known	none available
(8) Other	41	WBGene00020194	T03G6.1	T03G6.1	2.24729	0.324944	-2.76	0.0197	0.363	not known	none available
(8) Other	42	WBGene00013612	Y102A5C.3	fbxa-207	1.93667	0.326882	-3.36	0.00692	0.275	F-box A protein	none available
(8) Other	43	WBGene00006952	ZK377.1	wrt-6	0.134591	0.328387	-4.3	0.00146	0.154	WaRThog (hedgehog-like family)	wrt-6 encodes a hedgehog-like protein, with (from N- to C-terminus) a signal sequence, a Wart domain, an short region of low-complexity sequence, and a Hint/Hog domain; WRT-6 is expressed in sheath and socket cells of anterior sensilla, seam cells, and hypodermis; the Hint/Hog domain is predicted to cut WRT-6 into two halves and then covalently link cholesterol to the C-terminus of the Wart domai…
(8) Other	44	WBGene00044024	C35A5.11a	C35A5.11	1.21605	0.335385	-2.24	0.0485	0.478	not known	none available
(8) Other	45	WBGene00007334	C05C10.7	C05C10.7	6.29253	0.337023	-2.66	0.0233	0.377	not known	none available
(8) Other	46	WBGene00007785	C27H6.3	C27H6.3	20.6989	0.344003	-6.4	6.9e-05	0.056	Twenty One u-rna (21U-RNA) biogenesis Fouled Up	none available
(8) Other	47	WBGene00017441	F13H8.8	F13H8.8	2.57416	0.346132	-3.64	0.00431	0.229	not known	none available
(8) Other	48	WBGene00017620	F20A1.9	F20A1.9	21.9058	0.350268	-3.74	0.00367	0.219	Twenty One u-rna (21U-RNA) biogenesis Fouled Up	none available
(8) Other	49	WBGene00045509	T07D10.8	T07D10.8	3.06421	0.35036	-3.76	0.00353	0.216	not known	none available
(8) Other	50	WBGene00008535	F02H6.2	F02H6.2	13.8563	0.350965	-4.5	0.00108	0.13	not known	none available
(8) Other	51	WBGene00016455	C35E7.3	C35E7.3	1.85081	0.351695	-2.74	0.0204	0.367	not known	none available
(8) Other	52	WBGene00002033	Y73B6BL.2	htp-2	25.6941	0.353355	-3.96	0.00255	0.181	Him-Three Paralog	htp-2 encodes, along with him-3, htp-1, and htp-3, one of four C. elegans meiosis-specific HORMA domain-containing proteins; HTP-2 is a component of the lateral element of the synaptonemal complex, and functions to regulate synaptonemal complex assembly and meiotic chromosome segregation.
(8) Other	53	WBGene00045086	Y43B11AR.7	Y43B11AR.7	1.03096	0.353523	-2.89	0.0157	0.334	not known	none available
(8) Other	54	WBGene00220190	Y65B4BM.2	Y65B4BM.2	1.04093	0.356023	-2.54	0.029	0.399	not known	none available
(8) Other	56	WBGene00011514	T06C12.5	fbxa-198	2.20448	0.358078	-3.68	0.00403	0.223	F-box A protein	This gene encodes a protein containing an F-box, a motif predicted to mediate protein-protein interactions either with homologs of yeast Skp-1p or with other proteins; this gene's encoded protein also contains an FTH/DUF38 motif, which may also mediate protein-protein interaction.
(8) Other	57	WBGene00016824	C50E3.13	C50E3.13	14.3099	0.360551	-5.54	0.000225	0.0861	not known	none available
(8) Other	58	WBGene00011155	R09B3.2	R09B3.2	67.5233	0.36124	-2.61	0.0253	0.385	not known	none available
(8) Other	60	WBGene00017461	F14D2.13a	bath-28	9.37922	0.363282	-4.32	0.00143	0.153	BTB and MATH domain containing	none available
(8) Other	61	WBGene00015818	C16A11.5	C16A11.5	8.8999	0.364147	-2.99	0.0133	0.325	not known	none available
(8) Other	62	WBGene00019139	F59H6.9	bath-1	5.25025	0.365238	-2.91	0.0153	0.332	BTB and MATH domain containing	none available
(8) Other	63	WBGene00010142	F56A8.8	F56A8.8	2.42389	0.366879	-2.35	0.04	0.442	not known	none available
(8) Other	64	WBGene00044692	F12E12.8	fbxb-91	2.09594	0.367073	-2.9	0.0156	0.334	F-box B protein	none available
(8) Other	65	WBGene00022854	ZK1127.7	cin-4	24.9833	0.367423	-3.07	0.0116	0.318	Chromosome INstability	none available
(8) Other	66	WBGene00010483	K01G12.3	K01G12.3	4.43098	0.37047	-3.05	0.012	0.319	not known	none available
(8) Other	67	WBGene00014822	R11H6.6	R11H6.6	1.63473	0.376669	-2.87	0.0163	0.342	not known	none available
(8) Other	68	WBGene00016402	C34D4.10	C34D4.10	5.08817	0.377682	-2.96	0.0139	0.331	not known	none available
(8) Other	69	WBGene00022172	Y71H2AM.7	cosa-1	7.51477	0.378545	-3.56	0.00495	0.238	CrossOver Site Associated	none available
(8) Other	70	WBGene00012210	W02D9.4	W02D9.4	8.34647	0.378836	-7.63	1.53e-05	0.0303	not known	none available
(8) Other	71	WBGene00008494	F01D5.3	F01D5.3	4.10553	0.381847	-2.58	0.0268	0.39	not known	none available
(8) Other	72	WBGene00016387	C34B2.2	kbp-5	18.8992	0.383253	-4.77	0.000707	0.114	KNL (kinetochore null) Binding Protein	none available
(8) Other	73	WBGene00012527	Y32F6A.1	set-22	16.8619	0.383554	-3.6	0.00465	0.235	SET (trithorax/polycomb) domain containing	set-22 encodes a SET domain-containing protein with no non-nematode orthologs; neither set-22(n5015) nor set-22(RNAi) have any obvious phenotypes.
(8) Other	74	WBGene00013158	Y53F4B.11a	Y53F4B.11	1.11936	0.384578	-2.31	0.0431	0.459	not known	none available
(8) Other	75	WBGene00009156	F26D10.12a	clec-196	5.93919	0.389121	-2.34	0.0405	0.445	C-type LECtin	none available
(8) Other	76	WBGene00018443	F45C12.12	btb-7	3.31088	0.390036	-2.75	0.0199	0.364	BTB (Broad/complex/Tramtrack/Bric a brac) domain protein	none available
(8) Other	78	WBGene00019795	M151.3	M151.3	3.81363	0.392473	-2.8	0.0184	0.357	not known	none available
(8) Other	79	WBGene00003976	T28H11.4a	pes-1	1.48367	0.394571	-3.07	0.0115	0.317	Patterned Expression Site	none available
(8) Other	80	WBGene00003092	Y22F5A.6	lys-3	1.41412	0.395006	-2.62	0.0252	0.384	LYSozyme	lys-3 encodes one of a family of ten C. elegans lysozyme genes that are homologous to lysozymes in the amoeboid protozoon Entamoeba histolytica.
(8) Other	81	WBGene00011011	R04D3.3	R04D3.3	51.399	0.395461	-3.84	0.00309	0.202	not known	none available
(8) Other	82	WBGene00010750	K10D11.6	K10D11.6	2.0148	0.3962	-3.53	0.0052	0.243	not known	none available
(8) Other	83	WBGene00012565	Y37H2A.5a	fbxa-210	20.1031	0.397452	-6.07	0.000108	0.0593	F-box A protein	This gene encodes a protein containing an F-box, a motif predicted to mediate protein-protein interactions either with homologs of yeast Skp-1p or with other proteins; this gene's encoded protein also contains an FTH/DUF38 motif, which may also mediate protein-protein interaction.
(8) Other	84	WBGene00021279	Y23H5B.8	Y23H5B.8	1.5077	0.397609	-2.81	0.0181	0.357	not known	none available
(8) Other	85	WBGene00011689	T10C6.7	T10C6.7	5.77138	0.399088	-2.38	0.0379	0.435	not known	This gene encodes a protein containing an F-box, a motif predicted to mediate protein-protein interactions either with homologs of yeast Skp-1p or with other proteins.
(8) Other	86	WBGene00010691	K08H2.4	K08H2.4	1.53676	0.401206	-2.92	0.0149	0.331	not known	none available
(8) Other	87	WBGene00013610	Y102A5C.1	fbxa-206	11.0186	0.40148	-3.72	0.0038	0.219	F-box A protein	This gene encodes a protein containing an F-box, a motif predicted to mediate protein-protein interactions either with homologs of yeast Skp-1p or with other proteins; this gene's encoded protein also contains an FTH/DUF38 motif, which may also mediate protein-protein interaction.
(8) Other	89	WBGene00008824	F14H3.5	F14H3.5	7.16695	0.40383	-3.52	0.0053	0.245	not known	none available
(8) Other	90	WBGene00012041	T26E3.8	T26E3.8	0.843503	0.40548	-3.11	0.0107	0.307	not known	none available
(8) Other	91	WBGene00007642	C17E4.2	C17E4.2	2.27877	0.406863	-2.39	0.0374	0.434	not known	none available
(8) Other	92	WBGene00013796	Y116A8C.19	Y116A8C.19	1.04815	0.406972	-2.26	0.0469	0.469	not known	Y116A8C.19 encodes a CCCH tandem zinc finger (TZF) protein; based upon its sequence similarity to C. elegans POS-1, the product of Y116A8C.19 is predicted to function as an RNA-binding protein.
(8) Other	93	WBGene00022657	ZK105.6	ZK105.6	0.421824	0.409379	-2.32	0.0418	0.453	not known	none available
(8) Other	94	WBGene00018762	F53E10.6	F53E10.6	20.8552	0.410784	-4.58	0.000941	0.125	not known	none available
(8) Other	95	WBGene00010124	F55G11.4	F55G11.4	17.422	0.412265	-2.28	0.0451	0.464	not known	F55G11.4 encodes a protein containing a CUB-like domain conserved amongst nematodes; F55G11.4 expression is increased in response to bacterial infection, suggesting that it plays a role in the defense response.
(8) Other	96	WBGene00000817	B0547.1	csn-5	27.7868	0.413148	-8.32	6.99e-06	0.022	COP-9 SigNalosome subunit	csn-5 encodes an ortholog of subunit 5 of the COP9 signalosome complex (CSN5), which in turn is a pan-eukaryotic multiprotein complex that positively regulates E3 ubiquitin ligases, physically interacts with SCF-type E3 ubiquitin ligases, and probably regulates protein degradation; CSN-5 (along with KGB-1 and ZYX-1) physically binds germline RNA helicases (GLH proteins), and csn-5(RNAi) results i…
(8) Other	97	WBGene00009270	F30F8.1	F30F8.1	40.8446	0.413613	-3.96	0.00255	0.181	not known	none available
(8) Other	98	WBGene00016880	C52E2.1	fbxb-95	1.05804	0.414062	-2.38	0.0382	0.435	F-box B protein	This gene encodes a protein containing an F-box, a motif predicted to mediate protein-protein interactions either with homologs of yeast Skp-1p or with other proteins; this gene's encoded protein also contains an FTH/DUF38 motif, which may also mediate protein-protein interaction.
(8) Other	99	WBGene00009863	F49B2.3	F49B2.3	0.756929	0.4149	-3.51	0.0054	0.248	not known	none available
(8) Other	100	WBGene00219778	B0025.7	B0025.7	2.1181	0.416605	-2.38	0.0378	0.435	not known	none available
(8) Other	101	WBGene00008726	F13A7.11	F13A7.11	2.32297	0.416948	-4.79	0.00068	0.112	not known	none available
(8) Other	102	WBGene00011049	R06A4.6	sdz-26	2.10808	0.41801	-4.57	0.000954	0.125	SKN-1 Dependent Zygotic transcript	none available
(8) Other	103	WBGene00007277	C03D6.5	asfl-1	24.9015	0.421087	-5.02	0.000482	0.108	ASF-Like	none available
(8) Other	104	WBGene00235353	Y67D8C.23	Y67D8C.23	1.02624	0.42292	-2.42	0.0356	0.428	not known	none available
(8) Other	105	WBGene00009123	F25H2.12a	F25H2.12	9.00383	0.424113	-6.3	7.86e-05	0.056	not known	none available
(8) Other	106	WBGene00015670	C10B5.1	C10B5.1	3.47384	0.426217	-6.02	0.000115	0.0601	not known	none available
(8) Other	108	WBGene00008823	F14H3.4	F14H3.4	13.6703	0.4293	-2.46	0.0333	0.421	not known	none available
(8) Other	109	WBGene00013101	Y51H4A.5	Y51H4A.5	1.70301	0.432076	-3.55	0.00504	0.238	not known	none available
(8) Other	110	WBGene00045163	Y67A10A.14	Y67A10A.14	0.852948	0.432359	-2.34	0.0405	0.445	not known	none available
(8) Other	111	WBGene00019035	F58E1.3	fbxb-26	1.39934	0.432796	-3.53	0.00524	0.245	F-box B protein	This gene encodes a protein containing an F-box, a motif predicted to mediate protein-protein interactions either with homologs of yeast Skp-1p or with other proteins.
(8) Other	112	WBGene00007278	C03D6.6	lab-1	13.2322	0.435393	-2.73	0.0206	0.367	Long Arms of the Bivalent protein	lab-1 encodes a protein containing a motif associated with binding, localization, and function of protein phosphatase 1 (PP1/Glc7); LAB-1 activity is required for establishment and maintenance of sister chromatid cohesion during meiosis; LAB-1 physically interacts with the protein phosphatases GSP-1 and GSP-2 and positively regulates the localization of GSP-2 to early meiotic nuclei; in addition,…
(8) Other	113	WBGene00006619	ZK546.15	try-1	25.5348	0.435828	-2.71	0.0215	0.369	TRYpsin-like protease	none available
(8) Other	115	WBGene00019042	F58E1.11	fbxc-21	1.20332	0.437008	-2.66	0.0236	0.377	F-box C protein	none available
(8) Other	116	WBGene00077443	Y71A12B.19	Y71A12B.19	0.793771	0.438243	-2.57	0.0274	0.392	not known	none available
(8) Other	118	WBGene00015590	C08C3.2	bath-15	14.0064	0.440107	-5.18	0.000379	0.102	BTB and MATH domain containing	none available
(8) Other	119	WBGene00044241	C53D6.11	C53D6.11	0.853651	0.440556	-2.92	0.0149	0.331	not known	none available
(8) Other	120	WBGene00013433	Y66D12A.7	Y66D12A.7	6.30678	0.441038	-3.72	0.00382	0.219	not known	none available
(8) Other	121	WBGene00019535	K08D10.12a	K08D10.12	5.09972	0.444644	-4.26	0.00156	0.155	not known	K08D10.12 encodes a putative tRNA 3'-site splicing endonuclease subunit, orthologous to human TSEN34 and budding yeast SEN34; K08D10.12 is coexpressed (as is DNJ-15) with the paralogous small nuclear ribonucleoprotein (snRNP)-associated proteins RNP-2/U1A and RNP-3/U2B
(8) Other	122	WBGene00018950	F56C9.6a	F56C9.6	65.3095	0.446389	-3.17	0.00962	0.3	not known	none available
(8) Other	123	WBGene00007434	C08B11.6	arp-6	21.5378	0.446871	-5.04	0.000463	0.108	Actin-Related Proteins	none available
(8) Other	124	WBGene00011017	R04F11.5	R04F11.5	11.7884	0.448634	-4.41	0.00123	0.138	not known	none available
(8) Other	125	WBGene00044541	K09H11.11	K09H11.11	1.82756	0.450705	-3.36	0.00693	0.275	not known	none available
(8) Other	126	WBGene00007171	B0393.6	B0393.6	31.5854	0.450771	-3.16	0.00991	0.3	not known	none available
(8) Other	127	WBGene00016993	CD4.8	CD4.8	7.92183	0.451691	-2.94	0.0145	0.331	not known	none available
(8) Other	128	WBGene00018456	F45D11.10	fbxc-39	2.0418	0.452516	-2.76	0.0198	0.363	F-box C protein	none available
(8) Other	129	WBGene00019605	K10B2.2a	K10B2.2	5.34999	0.453071	-4.72	0.00076	0.117	not known	none available
(8) Other	130	WBGene00018337	F42A9.8a	F42A9.8	9.73532	0.454391	-3.96	0.00253	0.181	not known	none available
(8) Other	131	WBGene00008910	F17C8.3	F17C8.3	0.837408	0.45454	-3.01	0.0128	0.321	not known	none available
(8) Other	132	WBGene00016374	C33H5.7	swd-2.2	27.4392	0.455178	-6.27	8.22e-05	0.056	Set1 WD40 repeat protein	none available
(8) Other	133	WBGene00022557	ZC204.7	fbxb-15	2.31732	0.455253	-4.45	0.00116	0.137	F-box B protein	none available
(8) Other	134	WBGene00018422	F44E2.9	F44E2.9	6.72598	0.45549	-4.9	0.000572	0.112	not known	none available
(8) Other	135	WBGene00015849	C16C8.11	C16C8.11	7.69694	0.456513	-4.11	0.002	0.158	not known	none available
(8) Other	136	WBGene00011513	T06C12.4	fbxa-197	5.02207	0.457611	-2.3	0.0433	0.46	F-box A protein	none available
(8) Other	137	WBGene00012498	Y24F12A.3	Y24F12A.3	4.36734	0.460027	-2.75	0.0201	0.366	not known	none available
(8) Other	138	WBGene00021944	Y55F3BR.7	Y55F3BR.7	3.57161	0.460479	-2.8	0.0184	0.357	not known	none available
(8) Other	139	WBGene00007797	C29A12.1	C29A12.1	23.2927	0.461224	-3.34	0.00725	0.276	not known	none available
(8) Other	140	WBGene00019989	R09F10.8	R09F10.8	29.7876	0.461593	-3.69	0.004	0.223	not known	none available
(8) Other	141	WBGene00016674	C45G9.2	C45G9.2	14.9196	0.462029	-4.19	0.00177	0.158	not known	none available
(8) Other	142	WBGene00016785	C49G7.7	C49G7.7	2.12641	0.464027	-2.63	0.0245	0.382	not known	none available
(8) Other	143	WBGene00016671	C45G7.4	C45G7.4	2.51339	0.464585	-3.81	0.00325	0.204	not known	none available
(8) Other	144	WBGene00019631	K10D2.5	K10D2.5	10.2177	0.465715	-4.35	0.00136	0.149	not known	none available
(8) Other	145	WBGene00017696	F22B7.6a	polk-1	44.2483	0.467461	-3.6	0.00468	0.235	POLK (DNA polymerase kappa) homolog	polk-1 encodes a putative DNA polymerase kappa orthologous to humam POLK (OMIM:605650); POLK-1 promotes lagging-strand synthesis through G/C rich sequences, and counteracts sensitivity to MMS mutagenesis in embryos; polk-1(RNAi) enhances the mutator phenotype of dog-1(gk10) 2.3-fold.
(8) Other	146	WBGene00006743	Y16B4A.1	unc-3	1.03472	0.467726	-2.54	0.0289	0.399	UNCoordinated	The unc-3 gene encodes a protein with homology to immunoglobulin (Ig) domain-containing transcription factors such as OLF-1 or SU(H).
(8) Other	147	WBGene00008536	F02H6.3a	F02H6.3	12.117	0.469326	-3.27	0.00819	0.288	not known	none available
(8) Other	148	WBGene00010678	K08F4.3	K08F4.3	27.3529	0.470913	-3.5	0.00547	0.249	not known	none available
(8) Other	149	WBGene00010542	K03H1.7	K03H1.7	11.9767	0.471949	-2.9	0.0155	0.334	not known	none available
(8) Other	150	WBGene00006873	M142.4	vab-7	0.86177	0.472424	-3.85	0.00307	0.202	Variable ABnormal morphology	The vab-7 gene encodes an even-skipped-like homeodomain protein that is required for DB motoneuron identity and posterior DB axonal polarity.
(8) Other	151	WBGene00011819	T16H12.11	hal-2	13.4384	0.472662	-2.66	0.0235	0.377	Homolog ALignment in meiosis abnormal	none available
(8) Other	152	WBGene00001808	T10G3.6a	gut-2	13.403	0.473321	-4.34	0.00138	0.15	GUT differentiation defective	gut-2 encodes a member of the Sm protein family with highest similarity to human U6 snRNA-associated Sm-like protein, LSm2, that affects embryonic viability.
(8) Other	153	WBGene00018070	F35H10.5	F35H10.5	4.11197	0.473418	-4.79	0.000684	0.112	not known	none available
(8) Other	155	WBGene00013241	Y56A3A.29a	ung-1	20.0751	0.47423	-5.15	0.000396	0.104	Uracil DNA N-Glycosylase	ung-1 encodes a uracil-DNA glycosylase; UNG-1 is required for genomic stability in somatic cells, and possibly also in germline, as well as for the recruitment of ATL-1 and RAD-51 to chromatin after depletion of dUTPase by dut-1(RNAi); ung-1(qa7600) or ung-1(RNAi) partially suppresses the lethality of dut-1(RNAi); purified UNG-1 can remove uracil from both U:G and U:A base pairs in DNA, and with …
(8) Other	156	WBGene00015816	C16A11.3a	C16A11.3	8.3643	0.474341	-2.59	0.0265	0.389	not known	none available
(8) Other	157	WBGene00018636	F49E8.2a	F49E8.2	35.7084	0.474588	-3.19	0.00933	0.3	not known	none available
(8) Other	158	WBGene00009651	F43D2.2	F43D2.2	9.17132	0.474885	-2.37	0.0387	0.435	not known	none available
(8) Other	160	WBGene00003184	F57B10.12	mei-2	69.2291	0.478641	-3.87	0.00297	0.198	defective MEIosis	mei-2 encodes a novel protein that contains a region similar to the p80-targeting subunit of katanin that is required for embryonic viability, alignment of chromosomes at the metaphase plate, and establishment of the oocyte meiotic spindle together with MEI-1; can interact with MEI-1 in HeLa cells and this complex can function to disassemble microtubules, expressed in the germ line, throughout th…
(8) Other	161	WBGene00020434	T11F8.2	T11F8.2	2.30739	0.478689	-2.34	0.0406	0.445	not known	none available
(8) Other	162	WBGene00019120	F59E12.4a	npl-4.1	6.21538	0.479722	-2.5	0.0311	0.411	NPL (yeast Nuclear Protein Localization) homolog	none available
(8) Other	163	WBGene00016553	C40A11.10	C40A11.10	2.66636	0.480131	-3.49	0.00558	0.253	not known	none available
(8) Other	164	WBGene00044987	K07A1.17	K07A1.17	13.6269	0.480662	-2.76	0.0197	0.363	not known	none available
(8) Other	165	WBGene00019132	F59H6.1	bath-19	5.73963	0.481791	-3.02	0.0126	0.319	BTB and MATH domain containing	none available
(8) Other	166	WBGene00012104	T27F6.4	sygl-1	42.2668	0.483338	-3.08	0.0113	0.314	SYnthetic GermLine proliferation defective	none available
(8) Other	167	WBGene00010128	F55G11.8	F55G11.8	5.1497	0.483436	-2.35	0.0401	0.442	not known	none available
(8) Other	168	WBGene00016163	C27D9.1	C27D9.1	36.1628	0.483966	-2.81	0.0181	0.357	not known	none available
(8) Other	169	WBGene00021730	Y49F6C.8	Y49F6C.8	8.04643	0.484206	-3.65	0.00427	0.229	not known	none available
(8) Other	170	WBGene00018724	F53A9.1	F53A9.1	4.02274	0.486175	-2.41	0.0361	0.43	not known	none available
(8) Other	171	WBGene00044492	Y54G2A.49a	Y54G2A.49	2.55455	0.486574	-2.62	0.0252	0.384	not known	none available
(8) Other	173	WBGene00020064	R13F6.1	kbp-1	15.589	0.488303	-2.94	0.0144	0.331	KNL (kinetochore null) Binding Protein	none available
(8) Other	174	WBGene00013587	Y80D3A.9	Y80D3A.9	8.63085	0.488362	-3.06	0.0118	0.319	not known	none available
(8) Other	175	WBGene00015104	B0280.9	B0280.9	33.771	0.490007	-3.74	0.00365	0.219	not known	none available
(8) Other	176	WBGene00006311	F57B1.2	sun-1	43.6409	0.490092	-2.75	0.02	0.365	SUN (S. pombe sad1/Ce-UNC-84) domain protein	sun-1 encodes a protein member of the SUN-domain family, also called Matefin and is paralogous to UNC-84, whose general domain organization (one or more central transmembrane and coiled-coil domains, followed by a C-terminal SUN domain) is shared by Sad1p from Schizosaccharomyces pombe and UNC-84 from C. elegans; SUN-domain proteins bind lamins and the KASH domain proteins of the outer nuclear me…
(8) Other	177	WBGene00022034	Y65B4BL.2a	deps-1	115.145	0.49013	-3.18	0.00942	0.3	DEfective P granules and Sterile	deps-1 encodes an large (619-residue), unfamiliar P-granule-associated protein required for germline RNAi, PGL-1's localization in P granules, accumulation of GLH-1 and RDE-4 (along with glh-1 mRNA), germline proliferation and fertility at high temperatures, and embryonic viability at low temperatures; unless rescued by maternal DEPS-1, deps-1 mutants show temperature-sensitive sterility at 24+ d…
(8) Other	178	WBGene00010998	R03G8.3	R03G8.3	4.53636	0.491989	-2.72	0.0212	0.367	not known	none available
(8) Other	179	WBGene00022852	ZK1127.5	ZK1127.5	13.2794	0.492872	-2.78	0.019	0.357	not known	none available
(8) Other	180	WBGene00001985	C18E3.8	hop-1	16.0155	0.493098	-2.52	0.0299	0.405	Homolog Of Presenilin	hop-1 encodes one of three C. elegans presenilins (the other two presenilins are encoded by sel-12 and spe-4); originally identified on the basis of its sequence similarity to SEL-12 and the human PS1 and PS2 presenilins, HOP-1 has been shown to function redundantly with SEL-12 in embryonic, larval, and germline development and thus, to likely function by regulating LIN-12/GLP-1 signaling; in add…
(8) Other	181	WBGene00012830	Y43F8C.8	mrps-28	9.66281	0.494064	-4.66	0.000833	0.124	Mitochondrial Ribosomal Protein, Small	none available
(8) Other	182	WBGene00021853	Y54F10AM.11	Y54F10AM.11	14.4613	0.494315	-2.41	0.0364	0.431	not known	none available
(8) Other	183	WBGene00016381	C33H5.15a	sgo-1	23.4119	0.495441	-2.64	0.0242	0.382	ShuGOshin (yeast chromosome segregation protein) homolog	none available
(8) Other	184	WBGene00010475	K01F9.2	K01F9.2	1.50656	0.496712	-2.78	0.0191	0.357	not known	none available
(8) Other	185	WBGene00007445	C08F8.3a	C08F8.3	40.6193	0.497932	-2.68	0.0227	0.377	not known	none available
(8) Other	186	WBGene00018904	F55G1.9	F55G1.9	14.0345	0.498383	-6.78	4.23e-05	0.0485	not known	none available
(8) Other	187	WBGene00017716	F22F4.1	F22F4.1	0.983916	0.498852	-2.88	0.016	0.339	not known	none available
(8) Other	188	WBGene00015025	B0205.11	mrpl-9	28.7165	0.499319	-5.37	0.000286	0.0975	Mitochondrial Ribosomal Protein, Large	none available
(8) Other	189	WBGene00011367	T02C12.2	snpc-3.4	14.1496	0.501049	-5.26	0.000335	0.102	SNAPc (Small Nuclear RNA Activating Complex) homolog	none available
(8) Other	190	WBGene00013122	Y52B11A.2a	Y52B11A.2	15.0368	0.502406	-4.48	0.0011	0.132	not known	none available
(8) Other	191	WBGene00020819	T26A5.2a	T26A5.2	21.9698	0.503112	-3.2	0.00917	0.297	not known	none available
(8) Other	192	WBGene00014516	T10C6.8	hpo-42	14.4331	0.503154	-4.26	0.00157	0.155	Hypersensitive to POre-forming toxin	none available
(8) Other	193	WBGene00008959	F19H6.4	F19H6.4	12.3529	0.504854	-3.16	0.00989	0.3	not known	none available
(8) Other	194	WBGene00016607	C43E11.9	C43E11.9	16.3266	0.50534	-4.59	0.000927	0.125	not known	none available
(8) Other	195	WBGene00001853	Y73B6BL.9a	hil-2	48.2061	0.505422	-2.84	0.0172	0.351	HIstone H1 Like	none available
(8) Other	196	WBGene00012280	W05E10.1	W05E10.1	2.4389	0.505488	-2.54	0.0289	0.399	not known	none available
(8) Other	197	WBGene00021112	W09C3.4	W09C3.4	15.9221	0.507012	-3.65	0.00429	0.229	not known	none available
(8) Other	198	WBGene00010328	F59C6.11	F59C6.11	2.15745	0.507905	-4.12	0.00196	0.158	not known	F59C6.11 encodes a claudin homolog that may be required for normal cohesion of apical junctions in epithelia; F59C6.11 is worm-specific, with obvious homologs only in C. elegans; F59C6.11 has no obvious function in mass RNAi assays; claudins are integral membrane proteins with four transmembrane sequences that are found in mammalian tight junctions (TJs), induce TJs when transgenically expressed …
(8) Other	199	WBGene00019129	F59G1.8a	F59G1.8	9.38399	0.509356	-3.52	0.00528	0.245	not known	none available
(8) Other	200	WBGene00008005	C38D4.4	C38D4.4	37.6824	0.512002	-2.4	0.0365	0.432	not known	none available
(8) Other	202	WBGene00022237	Y73B6BL.14	Y73B6BL.14	1.2775	0.513195	-2.87	0.0163	0.341	not known	none available
(8) Other	203	WBGene00000392	F49E8.4	cdd-2	19.7625	0.513443	-4.85	0.000622	0.112	CytiDine Deaminase	A functional cytidine deaminase that affects morphology of embryos; it is expressed at all life cycle stages.
(8) Other	204	WBGene00019075	F59A3.2	F59A3.2	16.7682	0.513877	-3.36	0.00694	0.275	not known	none available
(8) Other	205	WBGene00016745	C48B6.9	C48B6.9	4.31513	0.513887	-2.46	0.0331	0.42	not known	none available
(8) Other	207	WBGene00009292	F31D4.5a	F31D4.5	2.09583	0.515691	-3.04	0.0122	0.319	not known	none available
(8) Other	208	WBGene00011489	T05F1.2	T05F1.2	120.741	0.516142	-3.05	0.012	0.319	not known	T05F1.2 encodes a novel protein; in situ hybridization studies indicate that T05F1.2 mRNA is expressed in the medial germline.
(8) Other	209	WBGene00020433	T11F8.1	T11F8.1	6.01073	0.516804	-2.79	0.0187	0.357	not known	none available
(8) Other	210	WBGene00020858	T27C10.3	mop-25.3	9.39546	0.51782	-2.43	0.0349	0.424	MO25 (MOuse embryo scaffolding Protein) homolog	mop-25.3 encodes a divergent ortholog of fission yeast Mo25p, budding yeast Hym1p, Aspergillus nidulans HymA, human CAB39, and human CAB39L; MOP-25.3 is paralogous to MOP-25.1 and MOP-25.2.
(8) Other	211	WBGene00013151	Y53F4B.4a	Y53F4B.4	10.8555	0.518619	-2.69	0.0221	0.373	not known	none available
(8) Other	212	WBGene00022488	Y119D3B.11	orc-3	26.9734	0.518835	-6.14	9.74e-05	0.056	ORC (Origin Recognition Complex) subunit	none available
(8) Other	213	WBGene00010234	F58B3.9	ttr-50	41.1694	0.518907	-2.23	0.0492	0.481	TransThyretin-Related family domain	none available
(8) Other	214	WBGene00013419	Y65A5A.2a	Y65A5A.2	26.8959	0.519029	-2.8	0.0182	0.357	not known	none available
(8) Other	215	WBGene00019956	R08C7.13	fbxb-75	1.85602	0.519549	-2.32	0.0422	0.456	F-box B protein	none available
(8) Other	216	WBGene00021541	Y42H9B.3	Y42H9B.3	35.0618	0.520721	-3.71	0.00383	0.219	not known	none available
(8) Other	217	WBGene00044720	Y53F4B.42	Y53F4B.42	7.84443	0.522221	-2.72	0.0212	0.367	not known	none available
(8) Other	218	WBGene00014117	ZK858.3	clec-91	70.2473	0.522531	-4.12	0.00197	0.158	C-type LECtin	none available
(8) Other	219	WBGene00019247	H27M09.3	syp-4	55.5583	0.523121	-2.68	0.0224	0.375	SYnaPsis in meiosis abnormal	none available
(8) Other	220	WBGene00001831	F58A4.3	hcp-3	40.0947	0.523172	-3.03	0.0124	0.319	HoloCentric chromosome binding Protein	The hcp-3 gene encodes a centromere protein (CENP)-A homolog required for kinetochore function; inactivation of hcp-3 in one-cell embryos by RNAi causes a complete loss of kinetochores, with total failure of chromosomes to segregate properly during mitosis, to recruit components to the kinetochore other than HCP-3, or to assemble a stable mitotic spindle; in addition, HCP-4 fails to localize prop…
(8) Other	221	WBGene00001110	F38B7.5	duo-1	22.1898	0.525136	-3.03	0.0122	0.319	Deubiquitylating with USP/UBP and OTU domains	none available
(8) Other	222	WBGene00012110	T28A8.4	T28A8.4	19.8788	0.526553	-3.15	0.00993	0.3	not known	none available
(8) Other	223	WBGene00019598	K09H9.7	K09H9.7	10.1868	0.526855	-3.13	0.0104	0.303	not known	none available
(8) Other	224	WBGene00017091	E02C12.4	ttr-40	1.05555	0.529938	-2.39	0.0376	0.435	TransThyretin-Related family domain	none available
(8) Other	225	WBGene00009731	F45G2.3	exo-1	28.3291	0.530083	-3.26	0.00821	0.288	EXOnuclease	exo-1 encodes a 5'-3' exonuclease; by homology, EXO-1 is predicted to play a role in DNA metabolic processes, including recombination, double-strand break repair and DNA mismatch repair.
(8) Other	226	WBGene00016178	C28C12.2	mesp-1	115.817	0.530144	-3.15	0.01	0.3	MEiotic SPindle	none available
(8) Other	227	WBGene00019564	K09D9.1	K09D9.1	2.99074	0.531925	-3.25	0.00844	0.291	not known	none available
(8) Other	228	WBGene00021035	W05F2.3	W05F2.3	186.283	0.533008	-3.01	0.0128	0.321	not known	none available
(8) Other	231	WBGene00009163	F26E4.10a	drsh-1	32.5173	0.533432	-3.68	0.00403	0.223	Ortholog of Drosophila DRoSHa gene	drsh-1 encodes a predicted RNase III-type ribonuclease that is orthologous to Drosophila and human Drosha; by homology, DRSH-1 is predicted to function as an endoribonuclease that, in the nucleus, initiates cleavage of primary miRNA transcripts (pri-mRNAs) into pre-miRNAs that are then exported to the cytoplasm for further processing; loss of drsh-1 activity via RNAi results in re-expression of a…
(8) Other	232	WBGene00019547	K09C4.1a	K09C4.1	2.16737	0.533891	-2.96	0.014	0.331	not known	none available
(8) Other	233	WBGene00015610	C08F1.6	C08F1.6	4.8525	0.53448	-3.82	0.00319	0.202	not known	none available
(8) Other	236	WBGene00022775	ZK616.5	ZK616.5	20.4448	0.535983	-2.8	0.0183	0.357	not known	none available
(8) Other	237	WBGene00008488	F01D4.5a	F01D4.5	11.1938	0.536022	-3.21	0.00895	0.295	not known	none available
(8) Other	238	WBGene00001104	W09G12.1	dsl-2	8.08762	0.536902	-3.3	0.00778	0.283	Delta/Serrate/Lag-2 domain	dsl-2 encodes a putative transmembrane protein whose extracellular domain has single DSL and EGF domains in series, somewhat like Delta/LAG-2; DSL-2 belongs to a nematode-specific family of Delta/LAG-2-like proteins that includes DSL-1, -2, -3, -5, -6, and -7.
(8) Other	239	WBGene00022390	Y95B8A.11a	him-19	7.43718	0.537951	-2.67	0.0228	0.377	High Incidence of Males (increased X chromosome loss)	him-19 encodes a novel protein conserved amongst nematodes that has some similarity to members of the DDX6 DEAD/H-box RNA helicase family; during meiosis, him-19 is required for proper homologue recognition, recombination, and synaptonemal complex formation with a greater requirement seen in the female versus male germ line as well as in older animals.
(8) Other	241	WBGene00003418	H26D21.2	msh-2	62.708	0.539897	-2.57	0.0273	0.391	MSH (MutS Homolog) family	The msh-2 gene encodes a DNA mismatch repair protein homolog that is orthologous to human MSH2 (OMIM:120435); mutation of the human MSH2 gene leads to hereditary non-polyposis colon cancer (OMIM:120436).
(8) Other	242	WBGene00008740	F13D12.5	F13D12.5	25.2948	0.540642	-2.54	0.0286	0.399	not known	none available
(8) Other	243	WBGene00011509	T05H10.4a	T05H10.4	25.4561	0.542898	-3.11	0.0108	0.308	not known	none available
(8) Other	244	WBGene00007290	C04B4.2	C04B4.2	29.1591	0.542898	-2.8	0.0184	0.357	not known	none available
(8) Other	245	WBGene00019769	M04F3.3	M04F3.3	2.67359	0.542982	-2.48	0.0319	0.416	not known	none available
(8) Other	246	WBGene00019429	K06A5.1	K06A5.1	28.9344	0.543105	-5.38	0.000284	0.0975	not known	none available
(8) Other	247	WBGene00014958	Y105C5A.2	Y105C5A.2	0.269315	0.543575	-3.46	0.00587	0.257	not known	none available
(8) Other	248	WBGene00018045	F35D11.4	F35D11.4	12.0562	0.543592	-5.22	0.000355	0.102	not known	none available
(8) Other	250	WBGene00013246	Y57A10A.1	Y57A10A.1	15.4384	0.544185	-2.86	0.0166	0.345	not known	none available
(8) Other	251	WBGene00015112	B0281.5a	B0281.5	5.69356	0.544398	-3.86	0.00299	0.198	not known	none available
(8) Other	252	WBGene00017142	EEED8.14	EEED8.14	12.4238	0.545367	-2.57	0.0273	0.391	not known	none available
(8) Other	253	WBGene00020914	W01B11.2	sulp-6	0.836412	0.545461	-3.09	0.011	0.312	SULfate Permease family	sulp-6 encodes one of eight C. elegans members of the sulfate permease family of anion transporters; by homology, SULP-6 is predicted to function as an anion transporter that regulates cellular pH and volume via transmembrane movement of electrolytes and fluids; a sulp-6::GFP transcriptional fusion is expressed in the posterior intestine.
(8) Other	255	WBGene00017738	F23C8.9	F23C8.9	18.3063	0.54798	-3.62	0.00446	0.233	not known	none available
(8) Other	256	WBGene00004822	C42D4.6	skr-16	6.36437	0.54919	-4.14	0.0019	0.158	SKp1 Related (ubiquitin ligase complex component)	The skr-16 gene encodes a homolog of Skp1 in S. cerevisiae that has no known function in vivo, since skr-16(RNAi) animals are at least superficially normal.
(8) Other	257	WBGene00011892	T21C9.4	T21C9.4	14.8047	0.549857	-4.53	0.00101	0.13	not known	none available
(8) Other	258	WBGene00020684	T22D1.5	T22D1.5	87.9634	0.550299	-2.45	0.0336	0.422	not known	none available
(8) Other	259	WBGene00008316	C54G4.6	dod-18	5.33094	0.550719	-2.47	0.0327	0.42	Downstream Of DAF-16 (regulated by DAF-16)	dod-18 encodes a Maf-like protein required for normally short lifespan; dod-18 is repressed in daf-2 mutants and induced in daf-16 mutants, and dod-18(RNAi) lengthens lifespan by 30%; MAF-like proteins are ubiquitous among eukarya, bacteria, and archaea; DOD-18 is orthologous to the N-terminal ~200 residues of human ASMTL (OMIM:300162), and to Bacillus subtilis Maf (Multicopy Associated Filamenta…
(8) Other	260	WBGene00007194	B0491.7	B0491.7	12.9226	0.550805	-3.81	0.00325	0.204	not known	B0491.7 encodes a putative diphthine synthase orthologous to S. cerevisiae DPH5; DPH5 is an S-adenosylmethionine:EF-2 methyltransferase required for the enzymatic conversion of 3-amino-3-carboxypropyl-histidine to diphthine; DPH5 adds at least the last two of the three methyl groups present in diphthine, and is homologous to bacterial AdoMet:uroporphyrinogen III methyltransferases.
(8) Other	261	WBGene00010036	F54C8.2	cpar-1	27.9182	0.551615	-5.32	0.000308	0.102	Centromeric Protein A Related	cpar-1 encodes one of two C. elegans proteins homologous to the inner kinetochore histone H3 variant CENP-A (the other is encoded by hcp-3); loss of cpar-1 and hcp-3 activity via RNAi results in mitotic chromosome segregation defects, but no significant defects in meiotic chromosome segregation; when expressed in the germline using the pie-1 promoter, a CPAR-1::GFP fusion protein localizes to mei…
(8) Other	262	WBGene00015781	C14F11.6	C14F11.6	3.47503	0.551879	-2.94	0.0144	0.331	not known	none available
(8) Other	263	WBGene00007114	B0035.16	B0035.16	3.63487	0.553318	-4.26	0.00156	0.155	nuclear encoded Mitochondrial TRNA 2-ThioUridylase	mttu-1 encodes a mitochondrial tRNA 2-thiouridylase orthologous to human TRMU (tRNA 5-methylaminomethyl-2-thiouridylate methyltransferase); by homology, nuclear-encoded MTTU-1 is predicted to catalyze the 2-thiolation of uridine at the wobble position (U34) of mitochondrial tRNAs and thereby promote mitochondrial protein synthesis and respiratory function.
(8) Other	264	WBGene00015136	B0304.4	B0304.4	7.01502	0.554585	-2.38	0.0379	0.435	not known	none available
(8) Other	265	WBGene00011350	T01H3.4	perm-1	41.3157	0.555093	-3.25	0.00843	0.291	PERMeable eggshell	perm-1 encodes a sugar modifying enzyme; perm-1 is required for formation of the eggshell permeability barrier, a distinct envelope that forms between the embryonic plasma membrane and the trilaminar eggshell.
(8) Other	266	WBGene00007640	C17D12.7	C17D12.7	26.8436	0.556438	-2.52	0.0298	0.405	not known	none available
(8) Other	267	WBGene00017990	F32E10.2	cec-4	25.4258	0.557421	-3.07	0.0115	0.317	C.Elegans Chromodomain protein	none available
(8) Other	268	WBGene00000467	F52B5.5a	cep-1	25.0108	0.557714	-4.85	0.000625	0.112	C. Elegans P-53-like protein	cep-1 encodes an ortholog of the human tumor suppressor p53 (OMIM:191170, mutated in Li-Fraumeni syndrome) that promotes DNA damage-induced apoptosis and is required for normal meiotic segregation in the germ line, and affects sensitivity to hypoxia-induced lethality and longevity in response to starvation; CEP-1 is expressed ubiquitously in embryos and in the nucleoli of a subset of pharyngeal c…
(8) Other	269	WBGene00004354	F45B8.1	rgs-11	7.7103	0.558258	-2.35	0.0401	0.442	Regulator of G protein Signaling	none available
(8) Other	270	WBGene00013792	Y116A8C.13a	Y116A8C.13	21.9274	0.558671	-2.69	0.0222	0.373	not known	none available
(8) Other	271	WBGene00020193	T03F1.12	T03F1.12	9.76327	0.55924	-3.71	0.00386	0.219	not known	none available
(8) Other	272	WBGene00000592	F08H9.1	coh-3	14.6907	0.559589	-2.78	0.0189	0.357	COHesin family	coh-3 encodes a member of the Rad21/Rec8-like family of cohesion proteins known as kleisins; COH-3, along with its paralogs REC-8 and COH-4, function as members of a meiotic cohesin complex that mediates sister chromatid cohesion; coh-3 transcripts are expressed in the germline.
(8) Other	274	WBGene00006976	K02B12.8a	zhp-3	17.2409	0.56036	-2.36	0.0394	0.439	Zip (yeast meiotic zipper) Homologous Protein	zhp-3 encodes a RING finger protein orthologous to budding yeast Cst9p (meiotically expressed) and human RNF212 (associated with varying recombination rate); during meiosis, ZHP-3 activity is required for linking meiotic recombination with disassembly of the synaptonemal complex (SC) and bivalent formation; ZHP-3 activity is thus essential for proper chromosome segregation and normal levels of fe…
(8) Other	275	WBGene00008425	D2045.8	D2045.8	1.6318	0.561428	-2.25	0.0474	0.473	not known	none available
(8) Other	276	WBGene00002228	C06G3.2	klp-18	80.1355	0.56263	-3.52	0.00533	0.246	Kinesin-Like Protein	klp-18 encodes a kinesin motor protein whose motor domain is most similar to that of the Xenopus and human klp2 proteins; loss of klp-18 activity via RNAi indicates that KLP-18 is required for the assembly of a disordered array of acentrosomal (female meiotic) microtubules into an organized, functional, bipolar spindle; in addition, KLP-18 may also play a role in cortex dynamics during post-meiot…
(8) Other	277	WBGene00019692	M01A10.1	M01A10.1	15.8006	0.562814	-2.48	0.0321	0.416	not known	M01A10.1 encodes a protein, belonging to an ancient family of single-stranded nucleic acid-binding proteins, that is predicted to regulate gene expression through binding either mRNA or (locally) single-stranded DNA; it is most likely to specifically bind one or more discrete mRNAs and regulate their spatial localization or alternative splicing.
(8) Other	278	WBGene00015312	C01G8.1a	C01G8.1	114.481	0.563241	-2.77	0.0195	0.362	not known	none available
(8) Other	279	WBGene00001855	C18G1.5	hil-4	184.696	0.563249	-2.54	0.0287	0.399	HIstone H1 Like	none available
(8) Other	280	WBGene00011528	T06D8.7	T06D8.7	18.3977	0.563621	-5.02	0.000481	0.108	not known	none available
(8) Other	281	WBGene00019014	F57C12.2	F57C12.2	1.39922	0.563899	-2.28	0.0453	0.465	not known	none available
(8) Other	282	WBGene00010767	K11B4.2	K11B4.2	8.58996	0.564053	-2.28	0.0449	0.464	not known	none available
(8) Other	283	WBGene00009179	F26H11.1	kbp-3	20.3	0.56466	-2.48	0.0321	0.416	KNL (kinetochore null) Binding Protein	none available
(8) Other	284	WBGene00018909	F56A3.2	slx-1	23.0984	0.56544	-2.66	0.0233	0.377	yeast SLX (Synthetic Lethal X) homolog	none available
(8) Other	285	WBGene00022420	Y102E9.2a	Y102E9.2	58.1055	0.565677	-5.54	0.000223	0.0861	not known	none available
(8) Other	286	WBGene00001856	B0414.3	hil-5	162.653	0.56589	-3.36	0.00701	0.275	HIstone H1 Like	none available
(8) Other	287	WBGene00009296	F31E9.3	F31E9.3	0.306343	0.566475	-3.05	0.0118	0.319	not known	This gene encodes a protein containing an F-box, a motif predicted to mediate protein-protein interactions either with homologs of yeast Skp-1p or with other proteins; this gene's encoded protein also contains an FTH/DUF38 motif, which may also mediate protein-protein interaction.
(8) Other	288	WBGene00013215	Y54G11A.4	Y54G11A.4	1.66502	0.566593	-2.61	0.0257	0.386	not known	none available
(8) Other	289	WBGene00004726	F10E9.8	sas-4	27.3713	0.56762	-2.89	0.0157	0.334	Spindle ASsembly abnormal	sas-4 encodes a predicted coiled-coil protein and centriole component recruited to the centrosome once per cell cycle at the time of organelle duplication and is required for centriole duplication and spindle assembly, levels dictate centrosome size, and also affects germ cell proliferation and locomotion; colocalizes with gamma-tubulin to centrosomes both in sperm and in the syncitial part of th…
(8) Other	290	WBGene00013193	Y54E2A.8a	Y54E2A.8	14.9839	0.567891	-3.02	0.0126	0.319	not known	none available
(8) Other	291	WBGene00010899	M28.8	M28.8	6.25738	0.568998	-2.64	0.0244	0.382	not known	none available
(8) Other	292	WBGene00015010	B0041.6a	ptps-1	3.77694	0.569353	-2.73	0.0207	0.367	Pyruvoyl TetrahydrobioPterin Synthase	B0041.6 is orthologous to the human gene 6-PYRUVOYLTETRAHYDROPTERIN SYNTHASE (PTS; OMIM:261640), which when mutated leads to disease.
(8) Other	293	WBGene00022970	CD4.10	CD4.10	6.61092	0.569852	-2.72	0.021	0.367	not known	none available
(8) Other	294	WBGene00019008	F57C9.1a	F57C9.1	16.0271	0.569861	-4.71	0.00077	0.117	not known	none available
(8) Other	295	WBGene00014224	ZK1098.7	mrps-23	11.196	0.570045	-3.84	0.00313	0.202	Mitochondrial Ribosomal Protein, Small	none available
(8) Other	296	WBGene00011886	T21B10.4	T21B10.4	32.693	0.570853	-3.03	0.0124	0.319	not known	none available
(8) Other	297	WBGene00017733	F23C8.4	ubxn-1	72.6628	0.571079	-5.3	0.000318	0.102	UBX-containing protein in Nematodes	ubxn-1 encodes one of six C. elegans UBX (ubiquitin regulatory X) domain-containing proteins.
(8) Other	298	WBGene00017843	F26G5.1a	F26G5.1	12.8554	0.571155	-3.44	0.00605	0.263	not known	none available
(8) Other	299	WBGene00021495	Y40C5A.1	sqst-2	2.07427	0.571436	-2.74	0.0203	0.367	SeQueSTosome related	none available
(8) Other	301	WBGene00016262	C30F12.3	C30F12.3	1.25068	0.571725	-2.36	0.0396	0.439	not known	none available
(8) Other	302	WBGene00019011	F57C9.4a	F57C9.4	41.2301	0.571974	-5.11	0.000423	0.108	not known	none available
(8) Other	304	WBGene00010353	H02I12.5	H02I12.5	64.6361	0.574445	-3.19	0.00937	0.3	not known	none available
(8) Other	305	WBGene00016485	C36C9.1	C36C9.1	18.9705	0.574509	-2.47	0.0325	0.419	Maternal Effect Germ-cell defective	none available
(8) Other	306	WBGene00021056	W06B4.1	W06B4.1	72.1468	0.57483	-2.68	0.0226	0.377	not known	none available
(8) Other	307	WBGene00017667	F21E9.3	ttr-37	4.09268	0.575193	-3.05	0.0119	0.319	TransThyretin-Related family domain	none available
(8) Other	309	WBGene00012652	Y39A1A.14	Y39A1A.14	16.7772	0.576592	-2.99	0.0132	0.325	not known	none available
(8) Other	310	WBGene00017084	E01A2.1a	E01A2.1	22.6251	0.576705	-3.01	0.0127	0.321	not known	none available
(8) Other	311	WBGene00004243	B0273.2	puf-7	21.7975	0.577014	-2.84	0.017	0.349	PUF (Pumilio/FBF) domain-containing	puf-7 encodes a protein 97% identical to PUF-6 and functions redundantly with the other PUF genes, fbf-1, fbf-2, puf-6, and puf-8, during primordial germ cell development, based on combinatorial RNAi; interacts with NOS-2 in yeast two-hybrid screens.
(8) Other	312	WBGene00008877	F16A11.2	F16A11.2	19.7132	0.577367	-4.24	0.0016	0.155	not known	none available
(8) Other	313	WBGene00008169	C48B4.6	C48B4.6	10.4227	0.577769	-4.11	0.00198	0.158	not known	none available
(8) Other	315	WBGene00007332	C05C10.5a	C05C10.5	94.2432	0.578237	-2.79	0.0186	0.357	not known	C05C10.5 encodes a novel protein that is conserved in C. remanei and C. briggsae; large-scale RNAi screens have indicated that C05C10.5 activity is required for normal body morphology, chromosome segregation, and embryonic development; in situ hybridization experiments reveal that C05C10.5 mRNA is expressed in the medial germline.
(8) Other	316	WBGene00015487	C05D11.10	mrps-17	14.0751	0.579336	-2.27	0.0461	0.466	Mitochondrial Ribosomal Protein, Small	none available
(8) Other	317	WBGene00009367	F33H2.3	F33H2.3	35.6946	0.579895	-2.56	0.0277	0.394	not known	none available
(8) Other	318	WBGene00009301	F31F6.2	F31F6.2	6.05289	0.580188	-2.48	0.0317	0.414	not known	F31F6.2 encodes a novel protein that is conserved in C. elegans; three other genes related to F31F6.2 are present in tandem on the X chromosome; loss of F31F6.2 function via large-scale RNAi results in increased fat content.
(8) Other	319	WBGene00008399	D2005.4	D2005.4	36.5785	0.580272	-3.14	0.0101	0.3	not known	none available
(8) Other	321	WBGene00018948	F56C9.3	F56C9.3	39.7056	0.584063	-2.78	0.0191	0.357	not known	none available
(8) Other	322	WBGene00013156	Y53F4B.9	Y53F4B.9	114.298	0.584312	-2.75	0.0201	0.367	not known	none available
(8) Other	323	WBGene00011039	R05H5.4	R05H5.4	7.45744	0.584915	-3.44	0.00611	0.264	not known	none available
(8) Other	326	WBGene00012651	Y39A1A.13	orc-4	19.3642	0.586027	-3.93	0.00267	0.187	ORC (Origin Recognition Complex) subunit	none available
(8) Other	328	WBGene00016788	C49G7.10	C49G7.10	6.20678	0.586914	-3.13	0.0103	0.303	not known	none available
(8) Other	329	WBGene00008385	D1081.7a	D1081.7	186.541	0.587907	-2.48	0.0317	0.414	not known	none available
(8) Other	330	WBGene00009432	F35E12.8a	F35E12.8	5.74563	0.588002	-3.28	0.00801	0.285	not known	none available
(8) Other	331	WBGene00001975	F45E4.9	hmg-5	19.8164	0.588221	-3.21	0.00903	0.296	HMG	hmg-5 encodes an HMG (high mobility group) box-containing protein; HMG-5 binds to double-stranded telomeric DNA in vitro, and a deletion mutation in hmg-5 has been reported to result in lethality and sterility; HMG-5 is expressed in oocytes and all cells of early and late embryos, where it localizes to the nucleus, specifically to chromosomal ends.
(8) Other	332	WBGene00044949	Y49A10A.2	Y49A10A.2	6.03997	0.588692	-2.72	0.0209	0.367	not known	none available
(8) Other	333	WBGene00020760	T24C4.4	T24C4.4	2.76335	0.588853	-2.81	0.0181	0.357	not known	none available
(8) Other	334	WBGene00009132	F25H8.2	F25H8.2	24.2528	0.588926	-4.2	0.00171	0.158	not known	none available
(8) Other	335	WBGene00002143	Y47G6A.1	inx-21	14.064	0.589911	-3.02	0.0126	0.319	INneXin	inx-21 encodes an innexin, an integral transmembrane channel protein that is a structural component of invertebrate gap junctions; as loss of INX-21 activity via RNA-mediated interference (RNAi) does not result in any abnormalities, the precise role of INX-21 in C. elegans development and/or behavior is not yet known; the INX-21 expression pattern has not been determined.
(8) Other	337	WBGene00011743	T13F2.2	T13F2.2	22.7192	0.5923	-2.63	0.0246	0.382	not known	none available
(8) Other	338	WBGene00007710	C25A1.9a	rsa-1	43.2248	0.593198	-3.18	0.00946	0.3	Regulator of Spindle Assembly	rsa-1 encodes a protein phosphatase 2A (PP2A) regulatory subunit of the B'' class; RSA-1 is required for localization of C. elegans PP2A to centrosomes and for mitotic spindle assembly; RSA-1 physically interacts with the LET-92 PP2A catalytic subunit and the PAA-1 PP2A structural subunit; centrosomal levels of PAA-1 are decreased in rsa-1 mutant animals; RSA-1 localizes to centrosomes.
(8) Other	339	WBGene00077453	Y62F5A.12	Y62F5A.12	15.0081	0.593491	-2.45	0.0338	0.422	not known	none available
(8) Other	340	WBGene00015916	C17G10.2	C17G10.2	21.8441	0.593737	-3.03	0.0124	0.319	not known	none available
(8) Other	341	WBGene00021658	Y48G1A.2	Y48G1A.2	17.3514	0.594863	-2.72	0.021	0.367	not known	none available
(8) Other	342	WBGene00011364	T02B5.3	T02B5.3	5.35081	0.595027	-2.58	0.0271	0.391	not known	none available
(8) Other	343	WBGene00009113	F25D7.4	F25D7.4	50.4084	0.595037	-2.51	0.0303	0.406	not known	none available
(8) Other	344	WBGene00016435	C35B1.5	C35B1.5	47.6054	0.595122	-2.35	0.0397	0.439	not known	none available
(8) Other	345	WBGene00007561	C14A4.11	ccm-3	22.6745	0.596123	-3.58	0.0048	0.236	CCM (Cerebral Cavernous Malformation) gene homolog	ccm-3 encodes a protein with similarity to vertebrate programmed cell death protein 10, also known as TFAR15 or CCM3, which is associated with cerebral cavernous malformations type 3 (OMIM:603285); in C. elegans, deletion mutations in ccm-3 are associated with sterility and lethality and large-scale RNAi experiments targeting ccm-3 result in embryonic lethality, body morphology defects, and mater…
(8) Other	346	WBGene00017774	F25B5.2a	nop-1	62.6111	0.596687	-2.27	0.0457	0.466	NO Pseudocleavage or reduced pseudocleavage	none available
(8) Other	348	WBGene00018984	F56F10.1	F56F10.1	25.489	0.597408	-4.07	0.00212	0.16	not known	F56F10.1 encodes a predicted carboxypeptidase.
(8) Other	349	WBGene00009444	F35G12.11	F35G12.11	16.3234	0.597777	-2.61	0.0257	0.386	not known	none available
(8) Other	350	WBGene00020843	T27A3.7	T27A3.7	18.1134	0.598202	-3.17	0.00974	0.3	not known	none available
(8) Other	351	WBGene00015474	C05D9.7	C05D9.7	5.88713	0.598312	-2.63	0.0246	0.382	not known	none available
(8) Other	352	WBGene00021959	Y57E12AL.6	Y57E12AL.6	36.2872	0.598508	-5.09	0.000432	0.108	not known	none available
(8) Other	353	WBGene00008219	C50B6.3a	C50B6.3	53.6859	0.598645	-3.3	0.00769	0.282	not known	none available
(8) Other	354	WBGene00008035	C39E9.12	C39E9.12	52.0152	0.599146	-2.68	0.0228	0.377	not known	none available
(8) Other	355	WBGene00008167	C48B4.1	C48B4.1	8.54282	0.599221	-2.45	0.0336	0.422	not known	none available
(8) Other	358	WBGene00012858	Y44F5A.1	Y44F5A.1	12.4909	0.600897	-2.24	0.0487	0.478	not known	none available
(8) Other	359	WBGene00019792	M116.5	M116.5	10.5478	0.601029	-2.54	0.029	0.399	not known	none available
(8) Other	360	WBGene00018721	F53A3.2	polh-1	34.2453	0.601033	-2.67	0.0232	0.377	POLH (DNA polymerase eta) homolog	polh-1 encodes a putative DNA polymerase eta orthologous to human POLH (OMIM:603968, mutated in xeroderma pigmentosum); POLH-1 promotes lagging-strand synthesis through G/C rich sequences, is required for normal resistance to UV-induced mutagenesis in early embryos, and suppresses the damage-induced DNA replication checkpoint in embryos; polh-1(RNAi) enhances the mutator phenotype of dog-1(gk10) …
(8) Other	361	WBGene00012074	T27A8.2	T27A8.2	3.24806	0.602364	-2.52	0.03	0.406	not known	none available
(8) Other	362	WBGene00010891	M18.6a	M18.6	12.5857	0.602873	-3.74	0.00368	0.219	not known	none available
(8) Other	363	WBGene00021074	W07E6.2	W07E6.2	18.5828	0.602885	-2.26	0.0467	0.469	not known	W07E6.2 encodes an ortholog of S. cerevisiae RSA4 that may suppress tumorous growth in the germ line by ensuring robust larval germline proliferation; like PRO-1, -2, and -3, W07E6.2 is probably required for ribosome biogenesis, suggesting a link between biogenesis in the distal sheath and control of cell division in the germ line.
(8) Other	364	WBGene00012645	Y39A1A.6	mrpl-22	10.9558	0.603017	-3.81	0.00327	0.204	Mitochondrial Ribosomal Protein, Large	none available
(8) Other	366	WBGene00022099	Y69A2AR.28	Y69A2AR.28	16.05	0.603363	-2.53	0.0291	0.401	not known	none available
(8) Other	367	WBGene00007533	C12C8.2a	cbl-1	20.9168	0.604379	-4.57	0.000952	0.125	Cystathionine Beta Lyase	cbl-1 encodes a putative cystathionine gamma-lyase orthologous to human CTH (OMIM:607657, mutated in cystathioninuria), and paralogous to CTH-1 and CTH-2; CBL-1, unlike its paralog CTH-2, does not inhibit DHC-1 in vivo.
(8) Other	368	WBGene00011434	T04D3.5	T04D3.5	16.5359	0.605911	-3.03	0.0122	0.319	not known	none available
(8) Other	369	WBGene00020261	T05E7.5	vet-1	5.99222	0.606338	-2.78	0.0188	0.357	Very Early Transcript	none available
(8) Other	370	WBGene00011560	T07C4.3a	T07C4.3	144.75	0.606568	-2.56	0.0278	0.394	not known	none available
(8) Other	372	WBGene00002051	F52E10.5	ifa-3	3.51832	0.606687	-2.29	0.0446	0.463	Intermediate Filament, A	ifa-3 encodes an essential intermediate filament protein that is coexpressed with the essential IF protein IFB-1; IFA-3 is required for survival past early larval stages, correct positioning of excretory canals and body muscles, attachment of cuticle to hypodermis, and locomotion; IFA-3 forms heteropolymeric intermediate filaments in vitro with an equimolar mixture of IFB-1; IFA-3 is expressed in…
(8) Other	373	WBGene00012675	Y39B6A.13	Y39B6A.13	13.8153	0.606819	-2.46	0.0331	0.42	not known	none available
(8) Other	374	WBGene00014118	ZK858.5	ZK858.5	11.2762	0.607311	-2.87	0.0162	0.341	not known	none available
(8) Other	375	WBGene00001281	F10B5.6	emb-27	32.3873	0.607437	-3.06	0.0117	0.319	abnormal EMBroygenesis	emb-27 encodes a tetratricopeptide repeat (TPR)-containing protein that is the C. elegans ortholog of the anaphase-promoting complex (APC) subunit APC-6 (CDC16); required maternally and paternally, EMB-27 activity is essential for proper execution of the metaphase-to-anaphase transition during meiosis (both oogenesis and spermatogenesis) and mitosis (during germline proliferation); EMB-27 activit…
(8) Other	376	WBGene00011376	T02E1.3a	gla-3	60.7874	0.607757	-2.37	0.0388	0.435	Germ Line Apoptosis abnormal	gla-3 encodes a TIS11-like protein with two CCCH-like zinc-finger domains that inhibits apoptosis in the germline, and weakly inhibits RAS signalling in vulval development along with RAS-induced muscle protein degradation; GLA-3 inhibits physiological apoptosis in oocytes, keeping it down to a normal level of ~50% in hermaphrodite gonads; gla-3 is expressed in the germline of L4 larvae and adults…
(8) Other	377	WBGene00009404	F35C11.5	F35C11.5	61.9926	0.607983	-2.77	0.0195	0.362	not known	none available
(8) Other	378	WBGene00008561	F07H5.10	F07H5.10	18.0527	0.608141	-2.62	0.0249	0.384	not known	none available
(8) Other	379	WBGene00013857	ZC168.3a	orc-5	33.7362	0.608645	-3.3	0.00767	0.282	ORC (Origin Recognition Complex) subunit	none available
(8) Other	380	WBGene00007789	C28A5.2	C28A5.2	10.4551	0.609276	-3.45	0.00599	0.261	not known	none available
(8) Other	381	WBGene00001186	F55A8.1a	egl-18	16.361	0.609581	-3.61	0.00453	0.233	EGg Laying defective	egl-18 encodes a member of the GATA-family of transcription factors that affects cell migration, cell fate specification; expressed in the head, in hypodermal seam cells, VC neurons, and vulval precursor cells.
(8) Other	382	WBGene00016323	C32E8.5	C32E8.5	34.3436	0.610086	-2.92	0.0148	0.331	not known	none available
(8) Other	383	WBGene00008709	F11E6.6	F11E6.6	0.658818	0.610098	-2.89	0.0156	0.334	not known	none available
(8) Other	384	WBGene00019121	F59E12.5a	npl-4.2	8.08303	0.610526	-2.62	0.0249	0.384	NPL (yeast Nuclear Protein Localization) homolog	none available
(8) Other	385	WBGene00011010	R04D3.2	R04D3.2	17.3868	0.611335	-3.49	0.00557	0.253	not known	none available
(8) Other	387	WBGene00022036	Y65B4BL.4	Y65B4BL.4	23.518	0.612428	-2.48	0.0321	0.416	not known	none available
(8) Other	388	WBGene00007063	2L52.1	2L52.1	5.17407	0.612995	-4.41	0.00122	0.138	not known	2L52.1 encodes a protein with sequence similarity to GLI-family zinc-finger transcription factors; deletion mutations in 2L52.1 are reported to be homozygous viable.
(8) Other	389	WBGene00013862	ZC302.2a	wdr-5.3	39.2632	0.61432	-2.34	0.041	0.448	WD Repeat protein	none available
(8) Other	390	WBGene00021829	Y54E10A.7	mrpl-17	14.6338	0.614632	-5.21	0.000361	0.102	Mitochondrial Ribosomal Protein, Large	none available
(8) Other	391	WBGene00011532	T06D10.2	chaf-1	62.8347	0.614888	-2.26	0.0465	0.469	CHromatin Assembly Factor	none available
(8) Other	392	WBGene00010623	K07A12.5	K07A12.5	1.77861	0.614937	-2.66	0.0233	0.377	not known	none available
(8) Other	393	WBGene00017934	F30B5.4a	F30B5.4	24.9835	0.61511	-3.65	0.00428	0.229	not known	none available
(8) Other	394	WBGene00000866	Y43E12A.1	cyb-2.1	57.3089	0.615241	-3.03	0.0124	0.319	CYclin B	none available
(8) Other	397	WBGene00007991	C37A5.7	C37A5.7	7.59241	0.615649	-2.3	0.0439	0.461	not known	none available
(8) Other	398	WBGene00017101	E02H9.3a	E02H9.3	13.9103	0.615828	-4.13	0.00192	0.158	not known	none available
(8) Other	400	WBGene00013324	Y57G11C.34	mrps-7	13.3769	0.615973	-3.04	0.0121	0.319	Mitochondrial Ribosomal Protein, Small	none available
(8) Other	401	WBGene00013257	Y57A10A.14	Y57A10A.14	3.97043	0.616405	-2.51	0.0306	0.408	not known	none available
(8) Other	403	WBGene00011342	T01G5.7	T01G5.7	5.94668	0.616735	-4.62	0.000888	0.124	not known	none available
(8) Other	404	WBGene00045261	H29C22.1	H29C22.1	16.0152	0.618359	-2.72	0.0212	0.367	not known	none available
(8) Other	406	WBGene00023427	F14D2.15	F14D2.15	5.2482	0.619743	-3.39	0.00658	0.274	not known	none available
(8) Other	408	WBGene00002068	C27A2.3	ify-1	77.7384	0.619992	-2.73	0.0207	0.367	Interactor of FizzY protein	ify-1 encodes a rapidly evolving protein ligand of FZY-1, with only 53% identity between C. elegans and C. briggsae and with no visible homologs in more distant species; IFY-1 binds FZY-1 and SEP-1 in yeast two-hybrid assays; ify-1(RNAi) and sep-1(RNAi) animals arrest as one-cell embryos with disorganized chromosomes, supporting the hypothesis that IFY-1 is a securin; the fzy-1(h1983) mutation bl…
[truncated: 96 more rows]

## Sheet: Supplementary file 1d
Grouping	Rank	Wormbase	Sequence	Gene Name	Predicted Human Ortholog	WT CPM	FC WT + skn-1 RNAi vs. WT + EV	FC glp-1(ts) + EV vs. WT + EV	FC glp-1(ts) + skn-1 vs. glp-1(ts) + EV	min t	min P	min FDR		skn-1 RNAi in glp-1(ts) vs. N2 deviation		Predicted SKN-1 binding sites	SKN-1::GFP ChIP-Seq L1 L2 L3				Gene Class	Manual Annotation	Description
[truncated: 87 more rows]
