# Supplementary figures and images for: Lipid-mediated regulation of SKN-1/Nrf in response to germ cell absence
Source: eLife journal article supplement (doi:10.7554/elife.07836), 2015-07-21

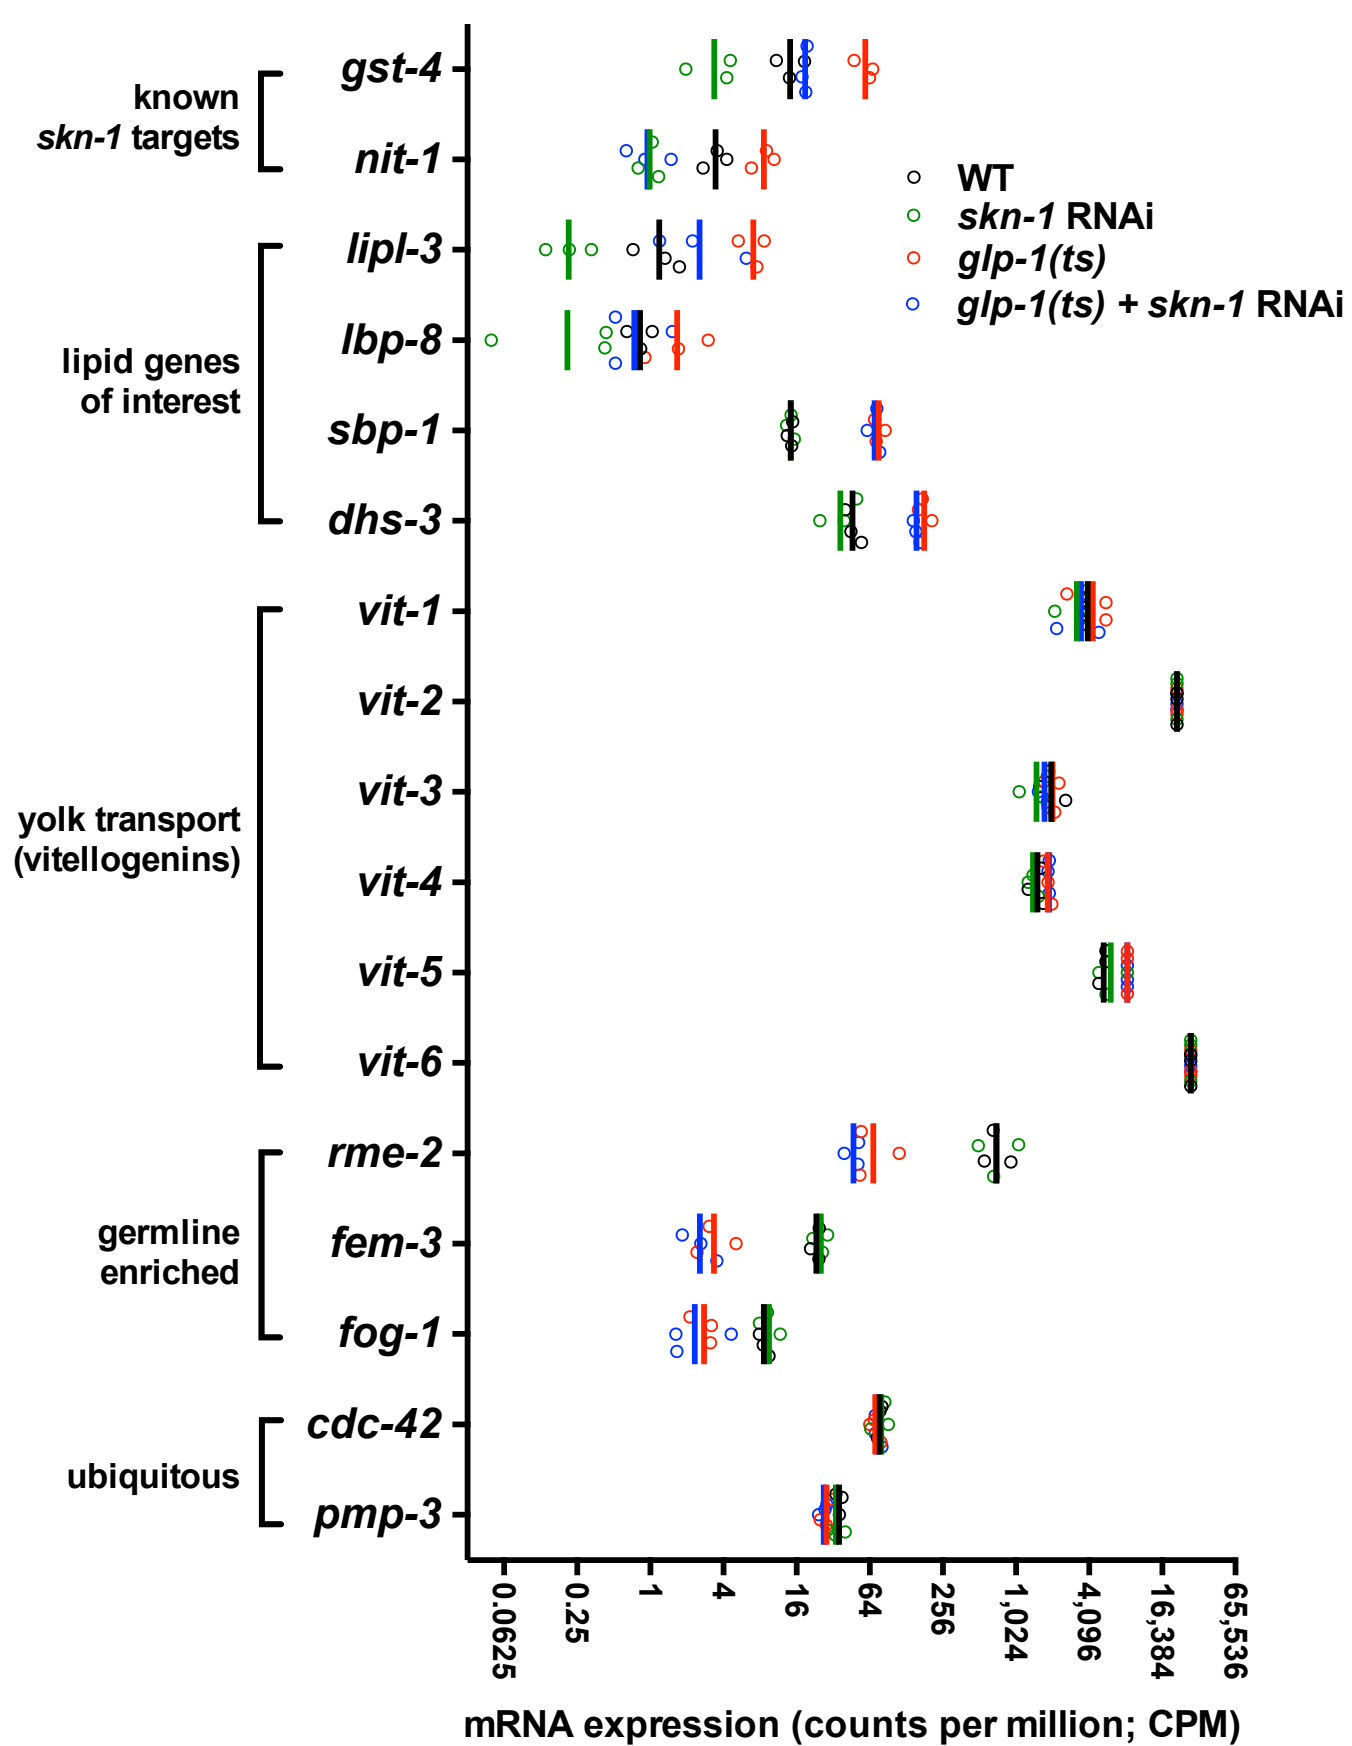

Supplement: supp [file elife-07836-supp-v1.zip]

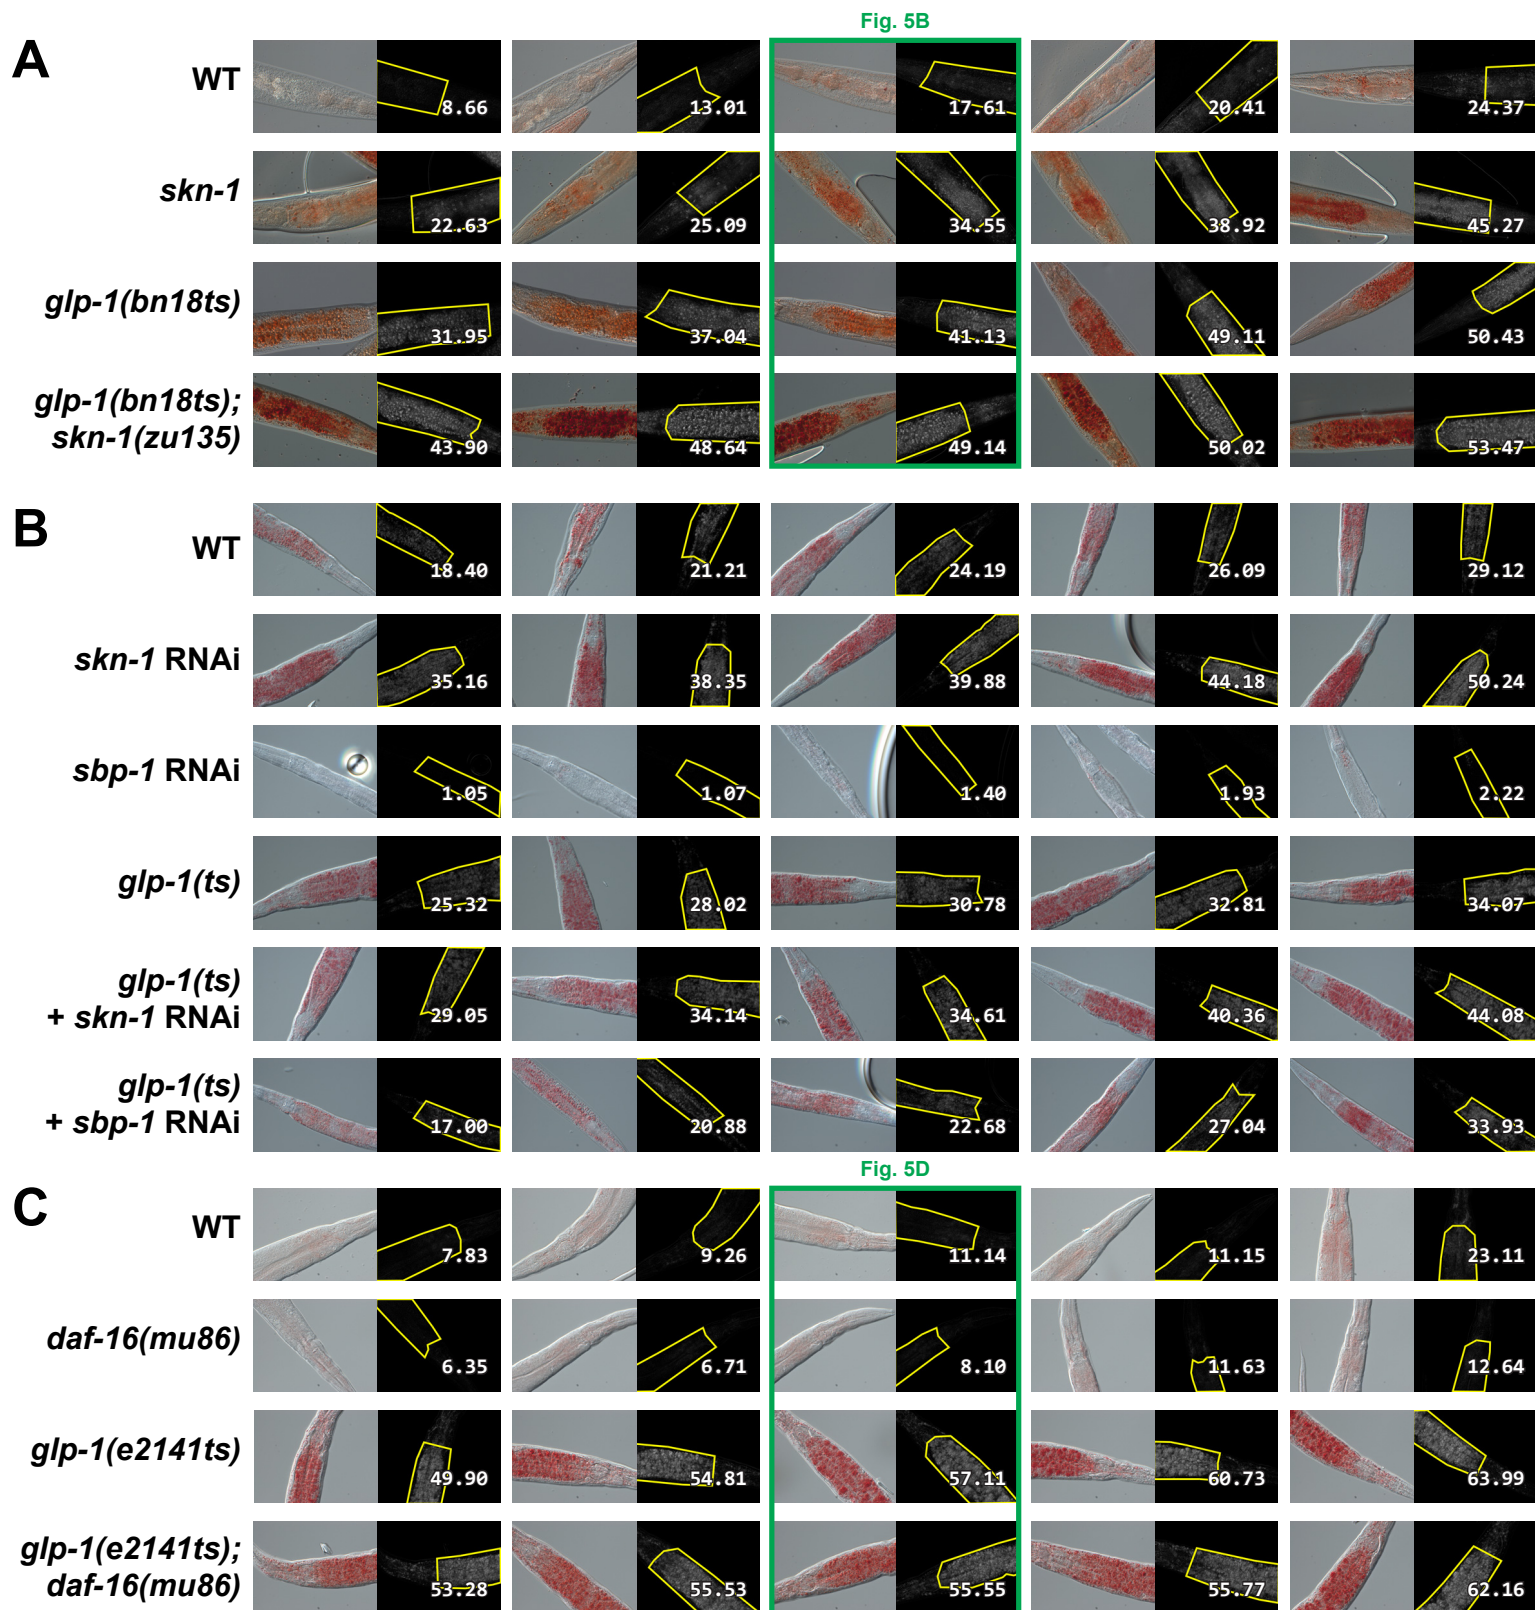

Supplement: supp [file elife-07836-supp-v1.zip]
